# Supplementary material for: Identification of a Selective RelA Inhibitor Based on DSE-FRET Screening Methods
Source: MDPI journal article supplement (doi:10.3390/ijms21239150), 2020-11-30
Supplement: s1 [file s1]

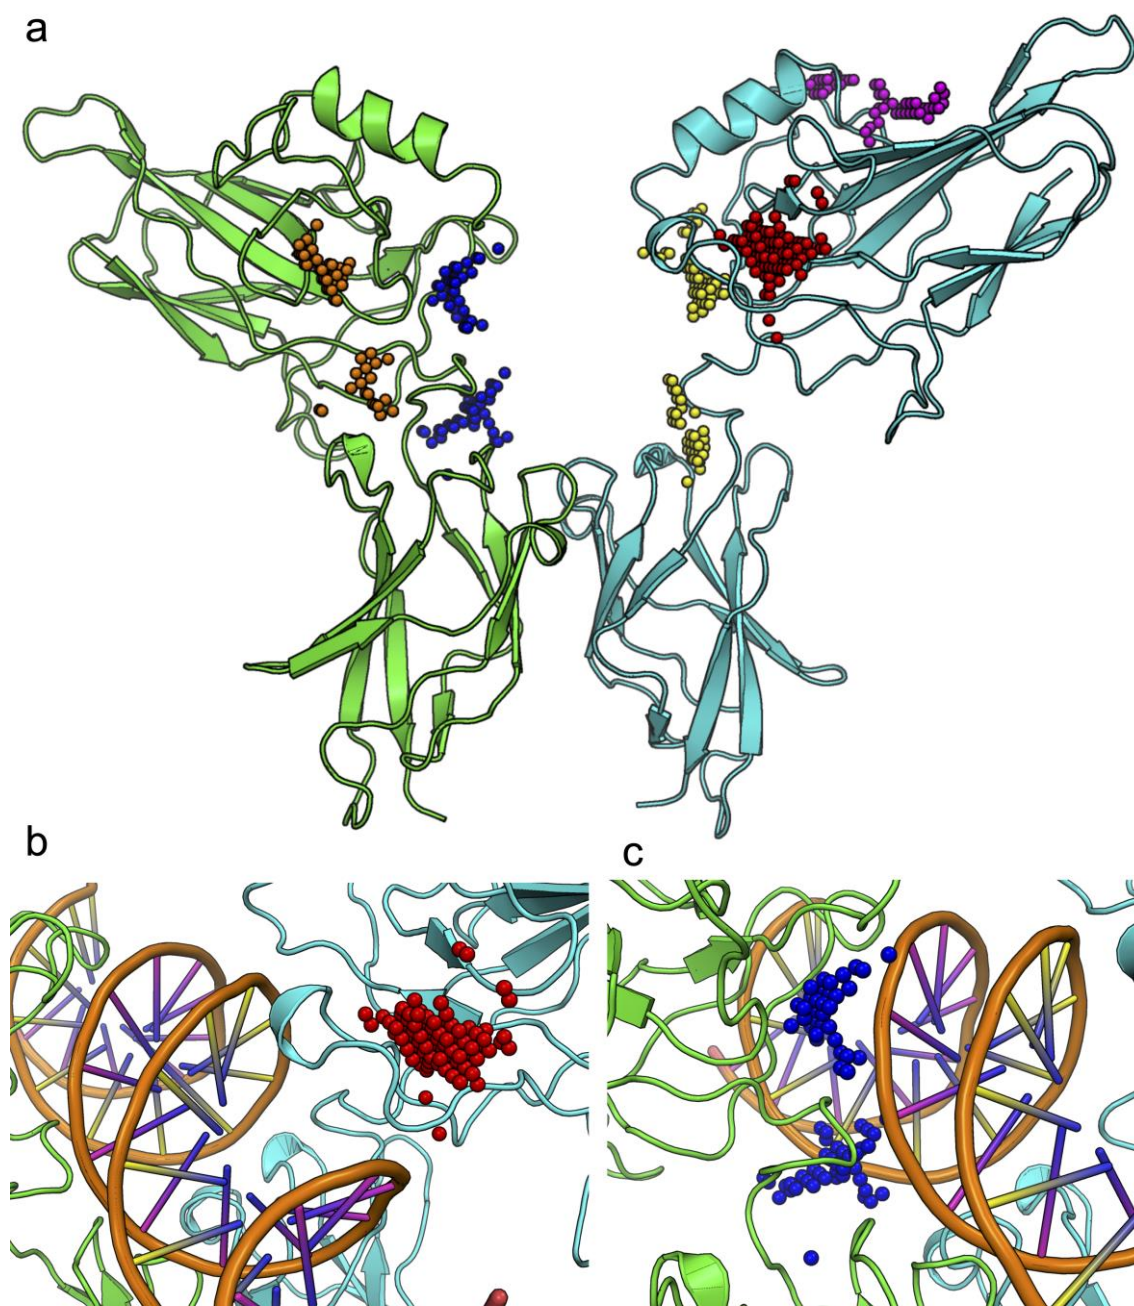

**Supplemental Figure S1.** Identification of putative small molecule binding pockets on the surface of NF- $\kappa$ B p55 (RelA) homodimer. Colored spheres shown in (A) represent site points belonging to a particular pocket. Red, yellow, blue, magenta, and orange represent the top 5 binding pockets, respectively, with Sitescore values in decreasing order. (B) and (C) show the close-up of binding pocket 1 (red) and 3 (blue), respectively. DNA molecule is also shown in the figure.

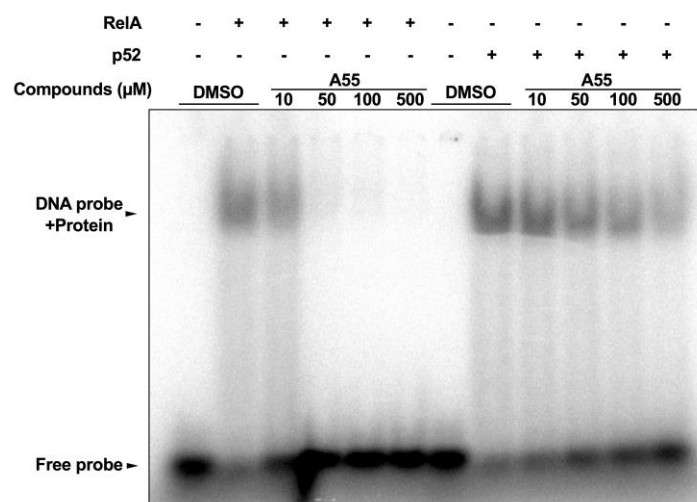

**Supplemental Figure S2.** EMSA with recombinant RelA or p52 were conducted using radiolabeled probes containing the NF- $\kappa$ B binding site.

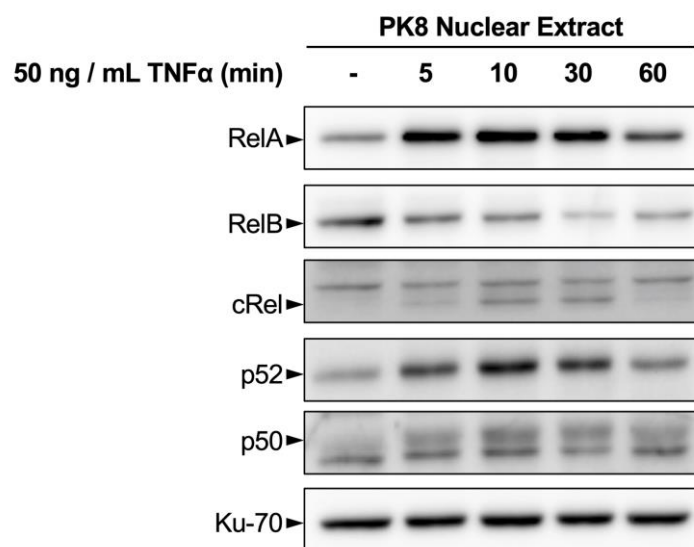

**Supplemental Figure S3.** NF- $\kappa$ B proteins of PK8 nuclear extract. PK8 cells were treated with TNF $\alpha$  (50 ng/mL) for 5 – 60 min; nuclear protein was then extracted. Ku-70 was used as loading control. EMSA was performed using PK8 nuclear extract of TNF $\alpha$  10 min treatment.

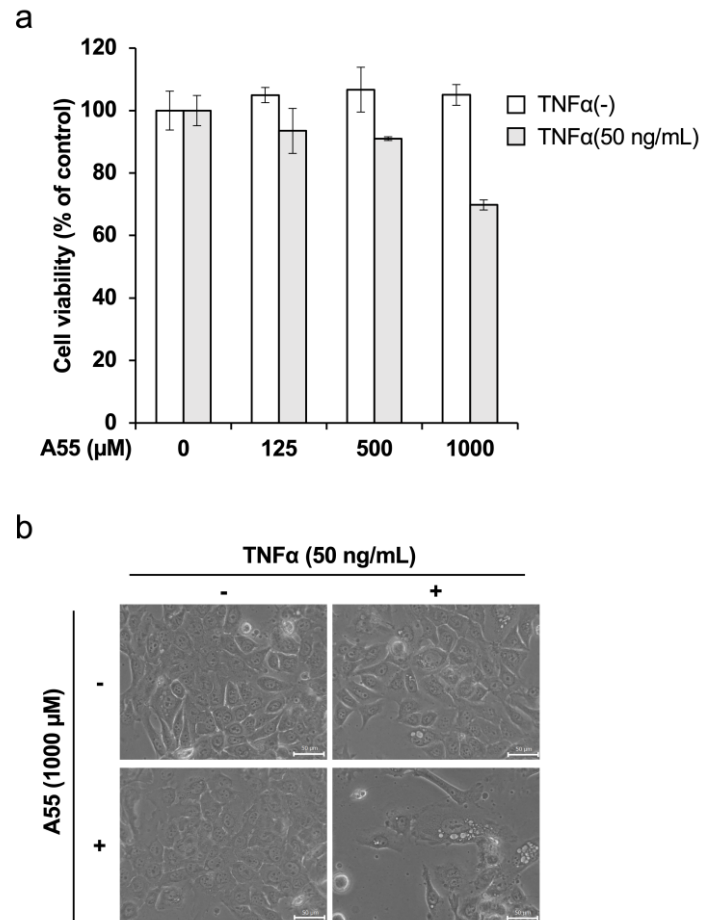

**Supplemental Figure S4.** Cell viability assay for PK8 cells treated with TNF $\alpha$  (50 ng/ mL) for 48 hr in the presence or absence of A55. (a): Cell viability was measured using Presto blue assay. TNF  $\alpha$  (-) in the absence of A55 was used as a control. Error bars represent SD (n = 3) (b): Cell morphology.
