# Supplementary material for: Identification of a Selective RelA Inhibitor Based on DSE-FRET Screening Methods
Source: Int J Mol Sci. 2020 Nov 30;21(23):9150. doi: 10.3390/ijms21239150 (PMC7734590; doi:10.3390/ijms21239150)
Supplement: Supplementary file 1 [file ijms-21-09150-s001.zip]

Archive with 8 entries (8 files):
- Supplementary_Figure_S1__S2__S3__S4_112720_Fri_2.pdf
- Table S1A. NF-kB_HTS_Todai Core.xlsx
- Table S1B. NF-kB_HTS_NPDepo.xlsx
- Table S1C. NF-kB_HTS_Known Drugs.xlsx
- Table S1D. NF-kB_Retest.xlsx
- Table S1E. p65_homodimer_VS_final_50 DSE inhibition rate, docking score.xlsx
- Table S1F. 2nd screening at 96 well plate.xlsx
- Table S2 SPR analysis.xlsx
