# Supplementary material for: Identification of a Selective RelA Inhibitor Based on DSE-FRET Screening Methods
Source: Int J Mol Sci. 2020 Nov 30;21(23):9150. doi: 10.3390/ijms21239150 (PMC7734590; doi:10.3390/ijms21239150)
Supplement: Supplementary file 1 [file ijms-21-09150-s001.zip › Table S1A. NF-kB_HTS_Todai Core.xlsx]

## Sheet: QC Date_RelA_Core Lib.
Plate ID	S/B	MLC	SDLC	CVLC	MHC	SDHC	CVHC	Z'
TC001RL110	3.98353	11605.9	314.811	2.71251	46580.4	553.002	1.1872	0.925562
TC002RL110	4.00823	11583.4	291.625	2.5176	46573	619.362	1.32987	0.921892
TC003RL110	4.10171	11349.3	320.535	2.82427	46748.8	678.706	1.45181	0.915317
TC004RL110	4.14527	11396.8	357.735	3.13892	47528.4	878.537	1.84844	0.897353
TC005RL110	4.105	12027.4	869.867	7.23236	48069.5	984	2.04704	0.845691
TC006RL110	4.05333	12086.7	311.845	2.58007	49325.4	750.742	1.52202	0.914396
TC007RL110	4.05274	12213	307.704	2.51948	49439.6	747.745	1.51244	0.914944
TC008RL110	4.036	12623.8	332.897	2.63705	50542.4	992.829	1.96435	0.895113
TC009RL110	3.87547	13076.2	406.892	3.11168	50515.1	922.491	1.82617	0.893475
TC010RL110	3.80143	13387.9	359.712	2.68683	50764.8	690.688	1.36057	0.915691
TC011RL110	4.24651	11794.4	310.296	2.63086	49574.5	930.062	1.87609	0.901507
TC012RL110	4.20166	11866.4	411.642	3.46898	49758.4	714.591	1.43612	0.910833
TC013RL110	4.18239	12219	402.362	3.29292	50948.7	780.512	1.53196	0.908375
TC014RL110	3.87889	12879.8	369.47	2.86861	50650.6	668.975	1.32076	0.91752
TC015RL110	3.65433	14410.4	1581.73	10.9763	51962.2	771.768	1.48525	0.81198
TC016RL110	4.23076	11628.7	678.265	5.83269	49746	777.051	1.56204	0.88546
TC017RL110	4.30196	11724.8	366.589	3.12663	49938	857.13	1.71639	0.90393
TC018RL110	4.20376	11797.2	326.192	2.76498	49648.3	568.449	1.14495	0.929092
TC019RL110	4.38778	11425.7	604.018	5.28649	50416.4	1062.69	2.10783	0.871761
TC020RL110	4.21644	12000.4	354.567	2.95462	50819.3	822.936	1.61934	0.909
TC021RL110	4.21539	12053.1	283.006	2.348	50899.6	870.891	1.711	0.910888
TC022RL110	4.25027	11945.6	308.382	2.58155	50930.4	665.606	1.30689	0.925049
TC023RL110	4.48204	11401.8	394.279	3.45805	51459.1	889.895	1.72933	0.903825
TC024RL110	4.42164	11708.2	237.098	2.02505	51942.1	838.839	1.61495	0.919774
TC025RL110	4.58279	11598.5	273.179	2.35529	53287.3	1335.91	2.50699	0.884207
TC026RL110	4.35411	12172.8	337.196	2.77007	52852.1	968.682	1.83282	0.903695
TC027RL110	4.24207	12233.1	255.93	2.09212	52262.4	1296.65	2.48103	0.883642
TC028RL110	4.24101	12467	403.817	3.23909	53103.3	1013.53	1.9086	0.895363
TC029RL110	4.09896	12916.5	370.674	2.86977	53106.8	1112.18	2.09422	0.889313
TC030RL110	3.82999	14179	1273.24	8.97979	52272.9	998.797	1.91073	0.821071

## Sheet: QC Date_p52_Core Lib.
Plate ID	S/B	MLC	SDLC	CVLC	MHC	SDHC	CVHC	Z'
TC00152110	4.93659	9856.12	303.685	3.08118	49040.4	1053.09	2.14739	0.896124
TC00252110	5.01419	10055.7	315.389	3.13643	50171.8	768.242	1.53122	0.918963
TC00352110	5.07912	9901.25	223.075	2.253	50167.1	714.703	1.42465	0.930131
TC00452110	5.08493	9939.38	255.647	2.57207	51315.2	994.556	1.93813	0.909353
TC00552110	5.19143	9994.62	224.058	2.24179	52138.1	844.723	1.62017	0.923918
TC00652110	5.03871	9312	277.439	2.97937	47118.9	874.335	1.85559	0.908606
TC00752110	4.97837	9465.81	234.299	2.47521	47126.2	771.254	1.63657	0.919898
TC00852110	4.96955	9489.94	299.759	3.1587	47458.3	661.865	1.39462	0.924019
TC00952110	4.94309	9586.56	340.668	3.5536	47429.6	770.708	1.62495	0.911896
TC01052110	4.79291	9886.5	214.974	2.17442	47318.5	765.979	1.61877	0.921381
TC01152110	5.36963	8860.5	234.358	2.64498	47670	983.91	2.064	0.905827
TC01252110	5.47052	8684	233.769	2.69195	47668.3	907.678	1.90415	0.912161
TC01352110	5.37424	8902.44	244.946	2.75145	47493.2	939.864	1.97894	0.907894
TC01452110	5.47603	8884.31	246.533	2.77493	48707.1	884.675	1.81632	0.914782
TC01552110	5.45456	9026.38	262.887	2.91243	49146.6	887.066	1.80494	0.914012
TC01652110	4.88973	9375.44	381.065	4.06451	45572.6	670.08	1.47036	0.912882
TC01752110	4.74241	9525.38	298.347	3.13213	45390.9	770.377	1.6972	0.910606
TC01852110	4.80358	9701	235.328	2.42581	46575.1	682.184	1.4647	0.925353
TC01952110	4.84114	9575.12	260.205	2.71751	46197.2	676.151	1.46362	0.923296
TC02052110	4.7966	9716.69	334.005	3.43743	46600.8	819.408	1.75836	0.906186
TC02152110	4.83458	9460.19	282.745	2.98879	46027.1	1132.75	2.46105	0.883871
TC02252110	4.80143	9542.56	272.343	2.85398	46119.6	851.629	1.84657	0.907813
TC02352110	4.78936	10113.9	1170.92	11.5773	47015.8	705.494	1.50055	0.847454
TC02452110	4.68062	10132.9	226.348	2.2338	47614.6	779.912	1.63797	0.91946
TC02552110	4.65295	10208.2	291.504	2.85559	47448.6	707.284	1.49063	0.91954
TC02652110	5.04824	9389	268.419	2.85887	47744.4	598.044	1.2526	0.932229
TC02752110	5.02782	9400.75	271.967	2.89304	47040.6	648.405	1.37839	0.926644
TC02852110	4.88888	9580.75	313.953	3.27691	47148.6	900.828	1.91062	0.902993
TC02952110	4.86307	9812.38	273.87	2.79106	48055.1	713.863	1.48551	0.922516
TC03052110	4.78271	10258.9	509.449	4.96594	48928.4	1130.7	2.31094	0.872756

## Sheet: HTS_Results
Plate ID	Row	Column	Inhibition % @ 10 mM			ReA																RelA	p52
			RelA	p52																-100~	-100	0	0
TC001RL110	A	3	0.294858	-0.227451																-100~-95	-95	0	0
TC001RL110	B	3	1.36421	0.933728																-95~-85	-85	0	0
TC001RL110	C	3	-0.608658	0.333998																-85~-80	-80	0	0
TC001RL110	D	3	0.589358	0.520297																-80~-75	-75	0	0
TC001RL110	E	3	-1.38923	-1.00072																-75~-70	-70	0	0
TC001RL110	F	3	0.946761	0.0277534																-70~-65	-65	0	0
TC001RL110	G	3	-0.542896	-0.0334955																-65~-60	-60	0	0
TC001RL110	H	3	0.454974	0.747429																-60~-55	-55	0	0
TC001RL110	I	3	-0.508585	-0.485207																-55~-50	-50	0	0
TC001RL110	J	3	0.480707	0.19874																-50~-45	-45	0	0
TC001RL110	K	3	0.743756	0.905656																-45~-40	-40	0	0
TC001RL110	L	3	0.480707	0.293166																-40~-35	-35	0	0
TC001RL110	M	3	-1.73519	-0.794004		Avg.		0.521366												-35~-30	-30	0	0
TC001RL110	N	3	-0.357046	0.744877		S.D.		3.44083												-30~-25	-25	0	0
TC001RL110	O	3	0.892436	0.275301		3S.D.		10.3225												-25~-20	-20	0	0
TC001RL110	P	3	0.783785	-0.232555		Avg.± 3S.D.		0.5 ± 10.3												-20~-15	-15	0	0
TC001RL110	A	4	-0.0596863	2.00048																-15~-10	-10	2	0
TC001RL110	B	4	0.632246	0.499881		p52														-10~-5	-5	13	0
TC001RL110	C	4	-0.411371	-0.000319005																-5~0	0	3454	4634
TC001RL110	D	4	1.42997	0.525402																0~5	5	5987	4920
TC001RL110	E	4	-1.43783	0.175772																5~0	10	93	16
TC001RL110	F	4	0.24911	0.655556																10~15	15	20	11
TC001RL110	G	4	-0.685857	0.451392																15~20	20	7	1
TC001RL110	H	4	1.3156	0.788262																20~25	25	4	5
TC001RL110	I	4	-1.92104	-0.41375																25~30	30	4	3
TC001RL110	J	4	-0.354187	0.275301																30~35	35	2	3
TC001RL110	K	4	0.686572	-0.77614																35~40	40	3	2
TC001RL110	L	4	0.923887	0.122179																40~45	45	1	0
TC001RL110	M	4	-0.920313	0.492225																45~50	50	1	0
TC001RL110	N	4	-0.428526	-0.546456																50~55	55	0	0
TC001RL110	O	4	0.340605	3.18463																55~60	60	0	0
TC001RL110	P	4	0.935324	1.14044		Avg.		0.184344												60~65	65	1	1
TC001RL110	A	5	1.15834	0.627483		S.D.		2.6273												65~70	70	1	0
TC001RL110	B	5	8.79248	0.928624		3S.D.		7.8819												70~75	75	1	0
TC001RL110	C	5	0.454974	0.305926		Avg.± 3S.D.		0.2 ± 7.9												75~80	80	1	0
TC001RL110	D	5	-0.348468	1.40841																80~85	85	0	0
TC001RL110	E	5	-0.214085	-0.480103																85~90	90	0	0
TC001RL110	F	5	0.260547	1.23232																90~95	95	0	0
TC001RL110	G	5	-0.468556	0.00478508																95~100	100	0	0
TC001RL110	H	5	0.517877	0.640243																100~		2	2
TC001RL110	I	5	-0.765915	-0.857805
TC001RL110	J	5	-0.0768417	0.163012
TC001RL110	K	5	0.0489643	0.93628
TC001RL110	L	5	0.283421	-0.115161
TC001RL110	M	5	-1.16907	0.339102
TC001RL110	N	5	4.15767	2.38839
TC001RL110	O	5	0.520737	0.0685861
TC001RL110	P	5	2.77953	2.84521
TC001RL110	A	6	0.961057	-0.0334955
TC001RL110	B	6	1.70731	0.206396
TC001RL110	C	6	-0.405653	-0.860357
TC001RL110	D	6	1.13261	0.265093
TC001RL110	E	6	-0.394216	0.280406
TC001RL110	F	6	1.72161	0.42332
TC001RL110	G	6	-0.906017	-1.02879
TC001RL110	H	6	2.70804	0.637691
TC001RL110	I	6	-0.168337	-0.061568
TC001RL110	J	6	0.117586	-0.0998486
TC001RL110	K	6	1.19837	-0.0283915
TC001RL110	L	6	1.43283	0.117075
TC001RL110	M	6	-2.25271	-0.571976
TC001RL110	N	6	-0.545755	-1.0441
TC001RL110	O	6	1.63869	0.908208
TC001RL110	P	6	3.33707	2.4037
TC001RL110	A	7	-0.354187	0.82399
TC001RL110	B	7	0.32345	0.68618
TC001RL110	C	7	-0.285565	0.277853
TC001RL110	D	7	1.57865	0.869927
TC001RL110	E	7	1.22125	0.395247
TC001RL110	F	7	1.19266	0.678524
TC001RL110	G	7	1.08972	1.24253
TC001RL110	H	7	1.32132	1.15576
TC001RL110	I	7	0.0175128	-0.17641
TC001RL110	J	7	-0.102575	0.191084
TC001RL110	K	7	0.0318089	-0.061568
TC001RL110	L	7	0.220518	0.316134
TC001RL110	M	7	-1.00037	-1.01858
TC001RL110	N	7	0.0575419	0.211501
TC001RL110	O	7	-	-
TC001RL110	P	7	0.723742	0.106867
TC001RL110	A	8	0.169052	0.903104
TC001RL110	B	8	-0.0225164	0.362071
TC001RL110	C	8	-0.560051	1.22721
TC001RL110	D	8	-0.179774	0.721909
TC001RL110	E	8	0.715164	0.780606
TC001RL110	F	8	1.09544	1.18128
TC001RL110	G	8	-0.948906	-0.0743282
TC001RL110	H	8	0.643683	1.03071
TC001RL110	I	8	0.352042	-0.0972966
TC001RL110	J	8	0.400649	0.778054
TC001RL110	K	8	0.523596	-0.255523
TC001RL110	L	8	0.0489643	0.300822
TC001RL110	M	8	-0.591502	-0.242763
TC001RL110	N	8	-0.419949	0.0992106
TC001RL110	O	8	1.19551	-0.171306
TC001RL110	P	8	1.00395	0.18598
TC001RL110	A	9	1.63583	1.03581
TC001RL110	B	9	-0.917454	0.0711382
TC001RL110	C	9	-0.093997	-0.487759
TC001RL110	D	9	0.0947119	-0.457134
TC001RL110	E	9	0.157615	0.658108
TC001RL110	F	9	0.377775	0.344207
TC001RL110	G	9	0.260547	-0.224899
TC001RL110	H	9	1.67586	1.74017
TC001RL110	I	9	-0.211225	-1.25337
TC001RL110	J	9	1.03826	0.601963
TC001RL110	K	9	-0.248395	-0.207034
TC001RL110	L	9	0.595076	0.18598
TC001RL110	M	9	-2.08974	-0.416302
TC001RL110	N	9	0.0746973	-0.0130792
TC001RL110	O	9	1.51289	-0.403542
TC001RL110	P	9	0.720882	1.43903
TC001RL110	A	10	2.32205	0.959249
TC001RL110	B	10	0.00893508	0.846959
TC001RL110	C	10	14.9398	0.150252
TC001RL110	D	10	0.815237	0.331446
TC001RL110	E	10	0.0632604	-0.523488
TC001RL110	F	10	0.709445	0.487121
TC001RL110	G	10	-0.408512	0.0660341
TC001RL110	H	10	1.09544	1.2706
TC001RL110	I	10	-0.0396718	-0.00797513
TC001RL110	J	10	-0.285565	1.31143
TC001RL110	K	10	1.50431	-0.0972966
TC001RL110	L	10	-0.0167979	0.614723
TC001RL110	M	10	-1.47786	-0.931814
TC001RL110	N	10	-0.425667	0.127283
TC001RL110	O	10	1.44713	0.119627
TC001RL110	P	10	1.14119	0.196188
TC001RL110	A	11	0.680853	0.387591
TC001RL110	B	11	0.855266	1.14555
TC001RL110	C	11	0.0746973	0.418216
TC001RL110	D	11	0.0260904	0.00733712
TC001RL110	E	11	0.0546827	0.706597
TC001RL110	F	11	0.10043	0.563682
TC001RL110	G	11	-0.279847	1.16086
TC001RL110	H	11	0.778067	0.966905
TC001RL110	I	11	0.557906	-0.291252
TC001RL110	J	11	0.260547	0.734669
TC001RL110	K	11	0.0289497	-0.00287105
TC001RL110	L	11	0.758052	0.32379
TC001RL110	M	11	-0.800226	0.0200973
TC001RL110	N	11	-0.371342	-0.30146
TC001RL110	O	11	0.423523	0.989873
TC001RL110	P	11	1.43283	1.46711
TC001RL110	A	12	-0.33989	1.17872
TC001RL110	B	12	1.02968	0.109419
TC001RL110	C	12	-0.494289	1.12768
TC001RL110	D	12	1.46142	0.900552
TC001RL110	E	12	1.07257	0.0175453
TC001RL110	F	12	1.20409	1.04857
TC001RL110	G	12	0.620809	0.451392
TC001RL110	H	12	0.786645	0.869927
TC001RL110	I	12	-0.537177	0.895448
TC001RL110	J	12	0.369198	1.0256
TC001RL110	K	12	0.186207	0.466705
TC001RL110	L	12	-0.154041	0.150252
TC001RL110	M	12	-0.594362	-0.0564639
TC001RL110	N	12	-0.454259	-0.296356
TC001RL110	O	12	0.317732	0.265093
TC001RL110	P	12	1.3156	0.81123
TC001RL110	A	13	0.21194	-0.0896405
TC001RL110	B	13	0.626528	1.29612
TC001RL110	C	13	0.858125	0.93628
TC001RL110	D	13	1.15834	0.275301
TC001RL110	E	13	-0.371342	0.617275
TC001RL110	F	13	-0.208366	0.563682
TC001RL110	G	13	0.39779	0.903104
TC001RL110	H	13	-0.191211	0.92352
TC001RL110	I	13	1.46428	0.550922
TC001RL110	J	13	0.46927	0.614723
TC001RL110	K	13	0.206222	0.0252014
TC001RL110	L	13	-0.322735	0.732117
TC001RL110	M	13	-1.04326	-0.758275
TC001RL110	N	13	0.1376	-0.487759
TC001RL110	O	13	1.08686	0.650452
TC001RL110	P	13	1.21553	1.26549
TC001RL110	A	14	1.48144	1.68658
TC001RL110	B	14	-0.0110795	0.550922
TC001RL110	C	14	0.10043	0.655556
TC001RL110	D	14	1.66443	1.35482
TC001RL110	E	14	-0.974639	-0.0794323
TC001RL110	F	14	0.366338	-0.799108
TC001RL110	G	14	0.54361	1.9622
TC001RL110	H	14	140.277	129.809
TC001RL110	I	14	1.11546	-0.102401
TC001RL110	J	14	0.00321663	0.487121
TC001RL110	K	14	-0.671561	0.242125
TC001RL110	L	14	0.166192	0.515193
TC001RL110	M	14	-1.20052	-0.845045
TC001RL110	N	14	0.0632604	-0.589841
TC001RL110	O	14	0.237673	0.0405137
TC001RL110	P	14	0.680853	0.69894
TC001RL110	A	15	23.5404	9.63109
TC001RL110	B	15	0.829533	0.78571
TC001RL110	C	15	0.763771	1.00008
TC001RL110	D	15	0.712305	-0.472447
TC001RL110	E	15	-0.528599	1.17617
TC001RL110	F	15	0.549329	-0.699578
TC001RL110	G	15	1.34705	0.844407
TC001RL110	H	15	-0.0596863	0.168116
TC001RL110	I	15	1.22125	0.282958
TC001RL110	J	15	1.02396	-0.148337
TC001RL110	K	15	0.583639	0.790814
TC001RL110	L	15	-0.111152	1.35482
TC001RL110	M	15	-2.21268	0.351863
TC001RL110	N	15	0.0346681	0.0941065
TC001RL110	O	15	2.55937	2.41136
TC001RL110	P	15	0.760911	0.78571
TC001RL110	A	16	0.963916	1.26294
TC001RL110	B	16	0.329168	0.875031
TC001RL110	C	16	-0.234099	0.313582
TC001RL110	D	16	-0.994653	0.303374
TC001RL110	E	16	0.577921	1.10216
TC001RL110	F	16	1.44141	1.22466
TC001RL110	G	16	0.0804157	0.482017
TC001RL110	H	16	1.57007	0.658108
TC001RL110	I	16	0.595076	0.134939
TC001RL110	J	16	0.477848	-0.102401
TC001RL110	K	16	0.54361	0.578994
TC001RL110	L	16	0.126163	0.635139
TC001RL110	M	16	-0.391357	-0.355053
TC001RL110	N	16	0.36062	0.362071
TC001RL110	O	16	0.835251	0.504985
TC001RL110	P	16	1.80167	1.22466
TC001RL110	A	17	1.1126	1.7708
TC001RL110	B	17	0.352042	0.0277534
TC001RL110	C	17	0.343465	0.313582
TC001RL110	D	17	0.612232	1.43903
TC001RL110	E	17	1.20981	0.635139
TC001RL110	F	17	0.712305	0.252333
TC001RL110	G	17	0.486426	0.351863
TC001RL110	H	17	0.10043	0.979665
TC001RL110	I	17	0.706586	0.550922
TC001RL110	J	17	-0.219803	0.43608
TC001RL110	K	17	0.0318089	0.331446
TC001RL110	L	17	-0.49143	1.31143
TC001RL110	M	17	0.660839	-0.408646
TC001RL110	N	17	-0.78593	-0.140681
TC001RL110	O	17	0.160474	-0.370365
TC001RL110	P	17	0.94962	0.369727
TC001RL110	A	18	0.921028	1.05367
TC001RL110	B	18	1.18122	1.11747
TC001RL110	C	18	-1.28629	0.872479
TC001RL110	D	18	-0.274128	1.59981
TC001RL110	E	18	0.0804157	1.52325
TC001RL110	F	18	0.171911	0.219157
TC001RL110	G	18	2.08187	0.563682
TC001RL110	H	18	0.723742	1.7759
TC001RL110	I	18	1.43569	-0.112609
TC001RL110	J	18	-0.717308	0.499881
TC001RL110	K	18	0.54361	1.44924
TC001RL110	L	18	-1.28915	0.806126
TC001RL110	M	18	-0.805944	0.344207
TC001RL110	N	18	0.283421	0.163012
TC001RL110	O	18	1.10402	0.119627
TC001RL110	P	18	1.3299	0.640243
TC001RL110	A	19	1.16978	0.744877
TC001RL110	B	19	-1.10044	0.469257
TC001RL110	C	19	1.67872	0.852063
TC001RL110	D	19	1.26128	0.862271
TC001RL110	E	19	0.363479	1.22211
TC001RL110	F	19	-0.234099	1.61512
TC001RL110	G	19	0.672276	1.13279
TC001RL110	H	19	0.1376	0.933728
TC001RL110	I	19	-0.465696	-0.112609
TC001RL110	J	19	0.194785	0.517745
TC001RL110	K	19	2.03613	0.716805
TC001RL110	L	19	0.443537	0.367175
TC001RL110	M	19	-0.0739825	-0.681714
TC001RL110	N	19	-0.199788	0.54837
TC001RL110	O	19	1.10402	0.464153
TC001RL110	P	19	1.62726	0.640243
TC001RL110	A	20	0.383494	1.92902
TC001RL110	B	20	0.566484	-0.255523
TC001RL110	C	20	-0.174055	1.18638
TC001RL110	D	20	0.906732	0.53561
TC001RL110	E	20	-0.0196572	0.402904
TC001RL110	F	20	-0.105434	0.382487
TC001RL110	G	20	1.48144	-0.061568
TC001RL110	H	20	-0.202648	1.03071
TC001RL110	I	20	1.39566	0.438632
TC001RL110	J	20	-0.537177	1.06133
TC001RL110	K	20	0.412086	1.21445
TC001RL110	L	20	0.8038	0.729565
TC001RL110	M	20	-1.15477	0.898
TC001RL110	N	20	-0.645828	-0.227451
TC001RL110	O	20	0.00321663	-0.52604
TC001RL110	P	20	0.220518	0.783158
TC001RL110	A	21	0.160474	0.790814
TC001RL110	B	21	1.55864	0.920968
TC001RL110	C	21	-0.411371	-0.227451
TC001RL110	D	21	-0.794507	0.282958
TC001RL110	E	21	-0.185492	0.451392
TC001RL110	F	21	-0.585784	0.609619
TC001RL110	G	21	0.0232312	0.599411
TC001RL110	H	21	0.5093	0.471809
TC001RL110	I	21	-0.774493	0.219157
TC001RL110	J	21	-0.788789	0.208948
TC001RL110	K	21	-1.27486	0.645347
TC001RL110	L	21	0.589358	1.06133
TC001RL110	M	21	-0.251254	-0.061568
TC001RL110	N	21	-0.49143	1.0843
TC001RL110	O	21	-0.219803	0.168116
TC001RL110	P	21	2.89961	1.09196
TC001RL110	A	22	0.372057	0.714253
TC001RL110	B	22	0.260547	1.18383
TC001RL110	C	22	-0.554332	0.882687
TC001RL110	D	22	1.16978	1.01284
TC001RL110	E	22	1.43283	0.52285
TC001RL110	F	22	-0.00536105	0.599411
TC001RL110	G	22	-0.285565	1.76314
TC001RL110	H	22	0.786645	0.331446
TC001RL110	I	22	0.0746973	-0.304012
TC001RL110	J	22	-1.08329	0.122179
TC001RL110	K	22	-0.777352	-0.771036
TC001RL110	L	22	-0.940328	1.0843
TC001RL110	M	22	-0.299861	-0.515831
TC001RL110	N	22	-1.12046	-0.16365
TC001RL110	O	22	4.09191	3.63634
TC001RL110	P	22	0.760911	1.49007
TC002RL110	A	3	0.378863	0.36223
TC002RL110	B	3	0.747544	-0.505253
TC002RL110	C	3	0.427449	-0.816849
TC002RL110	D	3	-0.218458	-0.163744
TC002RL110	E	3	-0.252754	-2.01338
TC002RL110	F	3	0.693242	0.247563
TC002RL110	G	3	0.233105	-0.0615402
TC002RL110	H	3	0.95332	-0.116381
TC002RL110	I	3	-0.778625	-0.485311
TC002RL110	J	3	0.355999	-0.293368
TC002RL110	K	3	0.556059	-0.111395
TC002RL110	L	3	-0.30134	0.631449
TC002RL110	M	3	-1.62173	-0.255976
TC002RL110	N	3	-0.438524	-1.0387
TC002RL110	O	3	0.107353	-0.343223
TC002RL110	P	3	1.15052	-0.246005
TC002RL110	A	4	0.613219	0.314868
TC002RL110	B	4	0.844716	0.0955041
TC002RL110	C	4	-0.564275	-0.0814823
TC002RL110	D	4	1.63638	-0.166236
TC002RL110	E	4	-1.69604	-0.861718
TC002RL110	F	4	0.527479	-0.208613
TC002RL110	G	4	-0.418518	0.534231
TC002RL110	H	4	0.393153	-0.537659
TC002RL110	I	4	0.124501	0.0905186
TC002RL110	J	4	0.235963	-0.963922
TC002RL110	K	4	-0.20131	-0.418006
TC002RL110	L	4	0.358857	0.277476
TC002RL110	M	4	-0.598571	-1.17581
TC002RL110	N	4	-0.0955642	-0.649833
TC002RL110	O	4	0.467461	0.147852
TC002RL110	P	4	-1.29878	-0.599978
TC002RL110	A	5	0.670378	-0.462876
TC002RL110	B	5	0.959036	-0.246005
TC002RL110	C	5	-1.03584	-0.213599
TC002RL110	D	5	-0.778625	-0.659804
TC002RL110	E	5	-0.24418	-0.186178
TC002RL110	F	5	1.11908	0.658869
TC002RL110	G	5	-0.17273	0.87574
TC002RL110	H	5	0.778982	-0.158758
TC002RL110	I	5	0.498899	-0.719631
TC002RL110	J	5	0.0644835	-0.116381
TC002RL110	K	5	-0.601429	0.279969
TC002RL110	L	5	1.06478	-0.0116849
TC002RL110	M	5	-1.7332	-0.682239
TC002RL110	N	5	-0.764335	-0.961429
TC002RL110	O	5	1.00476	0.0805475
TC002RL110	P	5	1.47062	0.0456488
TC002RL110	A	6	1.53349	-0.303339
TC002RL110	B	6	1.02763	-0.258469
TC002RL110	C	6	0.493183	-0.0440908
TC002RL110	D	6	0.0930635	0.793479
TC002RL110	E	6	-0.00410837	-1.39517
TC002RL110	F	6	0.215957	1.03029
TC002RL110	G	6	0.85329	-0.128845
TC002RL110	H	6	1.6078	0.564144
TC002RL110	I	6	4.8602	-0.80937
TC002RL110	J	6	0.215957	0.24507
TC002RL110	K	6	0.701816	-0.57505
TC002RL110	L	6	0.604645	0.962987
TC002RL110	M	6	-0.755761	-0.255976
TC002RL110	N	6	0.467461	-0.774472
TC002RL110	O	6	1.57922	-0.216092
TC002RL110	P	6	0.653231	0.579101
TC002RL110	A	7	-0.235606	-0.447919
TC002RL110	B	7	0.66752	1.37928
TC002RL110	C	7	0.275975	-0.221077
TC002RL110	D	7	-0.118428	0.494347
TC002RL110	E	7	0.164513	-0.629891
TC002RL110	F	7	-0.381364	0.437013
TC002RL110	G	7	0.89616	0.274983
TC002RL110	H	7	0.933314	0.419564
TC002RL110	I	7	-0.00410837	-0.418006
TC002RL110	J	7	0.793272	-0.253483
TC002RL110	K	7	0.0301876	0.531738
TC002RL110	L	7	-0.00125037	0.140374
TC002RL110	M	7	-0.524263	-0.216092
TC002RL110	N	7	-0.850075	-0.986357
TC002RL110	O	7	0.173087	-0.632384
TC002RL110	P	7	1.62781	-0.153773
TC002RL110	A	8	0.890444	0.631449
TC002RL110	B	8	0.91045	0.526753
TC002RL110	C	8	0.390295	0.160316
TC002RL110	D	8	0.313129	0.561652
TC002RL110	E	8	0.00446562	-0.889139
TC002RL110	F	8	0.0759155	-0.128845
TC002RL110	G	8	-0.0498363	0.456955
TC002RL110	H	8	0.947604	0.636435
TC002RL110	I	8	-1.21304	-0.682239
TC002RL110	J	8	0.416017	0.0655909
TC002RL110	K	8	0.873296	-0.0465836
TC002RL110	L	8	0.270259	0.167794
TC002RL110	M	8	-0.12986	-1.15836
TC002RL110	N	8	0.0387616	-0.654819
TC002RL110	O	8	0.476035	-0.348208
TC002RL110	P	8	1.06478	0.180258
TC002RL110	A	9	1.63352	-0.233541
TC002RL110	B	9	0.927598	0.631449
TC002RL110	C	9	-1.3045	-0.41302
TC002RL110	D	9	-0.52998	0.648898
TC002RL110	E	9	-0.507116	0.00576452
TC002RL110	F	9	-0.361358	0.43452
TC002RL110	G	9	1.4649	0.417071
TC002RL110	H	9	2.02221	0.845827
TC002RL110	I	9	-0.106996	0.464434
TC002RL110	J	9	-1.58172	0.102982
TC002RL110	K	9	0.756118	0.446984
TC002RL110	L	9	-0.164156	-0.0116849
TC002RL110	M	9	-0.367074	-0.405542
TC002RL110	N	9	-1.62459	-0.270933
TC002RL110	O	9	0.88187	0.252549
TC002RL110	P	9	1.72212	0.584086
TC002RL110	A	10	1.35915	0.414578
TC002RL110	B	10	0.384579	0.404607
TC002RL110	C	10	-0.507116	-0.19615
TC002RL110	D	10	-0.847217	-0.131338
TC002RL110	E	10	-0.121286	-0.231048
TC002RL110	F	10	1.10765	0.618985
TC002RL110	G	10	0.367431	-0.462876
TC002RL110	H	10	0.816136	0.611507
TC002RL110	I	10	0.973326	-0.0939462
TC002RL110	J	10	0.310271	-0.462876
TC002RL110	K	10	1.34486	-0.570065
TC002RL110	L	10	0.713248	0.235099
TC002RL110	M	10	-0.369932	-0.422991
TC002RL110	N	10	-0.321346	0.0630982
TC002RL110	O	10	0.0416195	0.529246
TC002RL110	P	10	0.701816	-0.156265
TC002RL110	A	11	-0.784341	-0.0964389
TC002RL110	B	11	0.227389	-0.00919208
TC002RL110	C	11	0.287407	0.135388
TC002RL110	D	11	-0.0698423	0.808435
TC002RL110	E	11	-0.409944	-0.418006
TC002RL110	F	11	0.756118	0.344781
TC002RL110	G	11	0.836142	-0.373136
TC002RL110	H	11	0.716106	0.0556199
TC002RL110	I	11	0.298839	-0.609949
TC002RL110	J	11	0.335993	-0.884153
TC002RL110	K	11	0.730396	0.414578
TC002RL110	L	11	1.64495	0.167794
TC002RL110	M	11	-0.972969	-1.49737
TC002RL110	N	11	-0.495683	0.716203
TC002RL110	O	11	0.341709	0.701247
TC002RL110	P	11	0.947604	0.733653
TC002RL110	A	12	0.736112	-0.415513
TC002RL110	B	12	0.450313	0.190229
TC002RL110	C	12	0.370289	1.40171
TC002RL110	D	12	-0.0126824	0.429535
TC002RL110	E	12	-0.0241143	0.444491
TC002RL110	F	12	-1.47026	0.250056
TC002RL110	G	12	-0.587139	0.73116
TC002RL110	H	12	0.578923	-0.545137
TC002RL110	I	12	0.247395	-0.442934
TC002RL110	J	12	-0.0727002	-0.221077
TC002RL110	K	12	-0.735755	-0.0141776
TC002RL110	L	12	1.40203	0.541709
TC002RL110	M	12	-0.489968	-0.866704
TC002RL110	N	12	-0.32992	-0.418006
TC002RL110	O	12	1.56493	-0.236034
TC002RL110	P	12	0.493183	-0.61992
TC002RL110	A	13	3.31688	2.10966
TC002RL110	B	13	-0.418518	0.402114
TC002RL110	C	13	0.138791	0.970465
TC002RL110	D	13	0.358857	0.581594
TC002RL110	E	13	0.141649	0.230114
TC002RL110	F	13	0.310271	0.307389
TC002RL110	G	13	0.573207	0.576608
TC002RL110	H	13	-0.224174	-0.0391053
TC002RL110	I	13	0.376005	0.432028
TC002RL110	J	13	0.0273296	-0.15128
TC002RL110	K	13	0.170229	0.756087
TC002RL110	L	13	0.0987795	-0.333252
TC002RL110	M	13	-1.02155	-0.275918
TC002RL110	N	13	-1.47598	-0.0889606
TC002RL110	O	13	0.879012	0.810928
TC002RL110	P	13	0.658946	0.140374
TC002RL110	A	14	1.06478	0.748609
TC002RL110	B	14	2.45948	0.207679
TC002RL110	C	14	0.0873475	0.673826
TC002RL110	D	14	2.11081	-0.270933
TC002RL110	E	14	0.573207	-0.747051
TC002RL110	F	14	0.347425	0.0257067
TC002RL110	G	14	0.247395	0.0979969
TC002RL110	H	14	-0.184162	-0.168729
TC002RL110	I	14	-0.584281	-0.181193
TC002RL110	J	14	1.18196	1.53383
TC002RL110	K	14	0.147365	-0.682239
TC002RL110	L	14	1.18768	0.890697
TC002RL110	M	14	0.0101816	-0.747051
TC002RL110	N	14	-2.75064	-1.57963
TC002RL110	O	14	-0.11557	0.0456488
TC002RL110	P	14	0.836142	0.0356777
TC002RL110	A	15	1.26484	0.696261
TC002RL110	B	15	-0.22989	0.741131
TC002RL110	C	15	0.121643	0.0955041
TC002RL110	D	15	0.118785	1.35186
TC002RL110	E	15	0.0959215	0.469419
TC002RL110	F	15	0.401727	0.466926
TC002RL110	G	15	0.396011	0.0506343
TC002RL110	H	15	0.436023	0.357245
TC002RL110	I	15	0.487467	0.923103
TC002RL110	J	15	-0.0155403	-0.390585
TC002RL110	K	15	0.224531	0.397129
TC002RL110	L	15	-0.178446	0.843334
TC002RL110	M	15	-1.42167	-1.36526
TC002RL110	N	15	-0.155582	0.484376
TC002RL110	O	15	0.207383	-0.345716
TC002RL110	P	15	0.62465	0.693768
TC002RL110	A	16	1.0705	-0.156265
TC002RL110	B	16	0.313129	-0.435455
TC002RL110	C	16	0.701816	-0.270933
TC002RL110	D	16	0.190235	-0.0889606
TC002RL110	E	16	-0.269902	0.00327176
TC002RL110	F	16	0.444597	0.282462
TC002RL110	G	16	-0.701459	0.0481416
TC002RL110	H	16	0.227389	0.461941
TC002RL110	I	16	-0.204168	0.292433
TC002RL110	J	16	-1.99042	0.581594
TC002RL110	K	16	1.05621	-0.218584
TC002RL110	L	16	0.161655	-0.074004
TC002RL110	M	16	0.130217	0.424549
TC002RL110	N	16	-0.610003	-0.659804
TC002RL110	O	16	1.09336	-0.111395
TC002RL110	P	16	1.53635	0.4071
TC002RL110	A	17	0.324561	1.02281
TC002RL110	B	17	-0.0898482	-0.00171378
TC002RL110	C	17	-2.40482	-1.19326
TC002RL110	D	17	-0.204168	0.033185
TC002RL110	E	17	0.86758	-0.0366125
TC002RL110	F	17	0.373147	0.698754
TC002RL110	G	17	0.85329	0.225128
TC002RL110	H	17	1.18482	-0.395571
TC002RL110	I	17	0.390295	0.748609
TC002RL110	J	17	-1.01584	0.982929
TC002RL110	K	17	0.235963	1.00786
TC002RL110	L	17	0.290265	0.212664
TC002RL110	M	17	-0.604287	-0.545137
TC002RL110	N	17	0.616077	0.908146
TC002RL110	O	17	0.107353	-0.522702
TC002RL110	P	17	0.99619	0.706232
TC002RL110	A	18	0.498899	-0.0540619
TC002RL110	B	18	0.839	0.394636
TC002RL110	C	18	1.07907	0.898175
TC002RL110	D	18	-0.11557	1.03528
TC002RL110	E	18	0.418875	0.255041
TC002RL110	F	18	0.487467	1.25713
TC002RL110	G	18	0.836142	0.26252
TC002RL110	H	18	0.267401	0.953016
TC002RL110	I	18	0.573207	0.277476
TC002RL110	J	18	1.20197	-0.156265
TC002RL110	K	18	0.487467	-0.168729
TC002RL110	L	18	-0.22989	0.643913
TC002RL110	M	18	-0.138434	0.37968
TC002RL110	N	18	-0.338494	0.237592
TC002RL110	O	18	1.43632	0.0157356
TC002RL110	P	18	0.744686	0.344781
TC002RL110	A	19	-0.804347	0.808435
TC002RL110	B	19	-0.20131	1.06021
TC002RL110	C	19	-0.972969	-0.315802
TC002RL110	D	19	0.987616	0.521767
TC002RL110	E	19	1.75356	-0.116381
TC002RL110	F	19	1.785	0.242577
TC002RL110	G	19	1.07907	0.043156
TC002RL110	H	19	1.14481	-0.659804
TC002RL110	I	19	0.656088	-1.01128
TC002RL110	J	19	0.0787735	-0.263454
TC002RL110	K	19	1.03906	0.292433
TC002RL110	L	19	-0.824353	0.0705765
TC002RL110	M	19	-0.269902	-0.562586
TC002RL110	N	19	-1.23876	-0.667283
TC002RL110	O	19	-1.03584	0.17278
TC002RL110	P	19	0.0359036	0.474405
TC002RL110	A	20	0.130217	-0.393078
TC002RL110	B	20	0.661805	0.651391
TC002RL110	C	20	-0.20131	0.399622
TC002RL110	D	20	0.264543	-0.370643
TC002RL110	E	20	-1.24734	0.0805475
TC002RL110	F	20	-0.212742	-1.20074
TC002RL110	G	20	0.841858	-0.00420654
TC002RL110	H	20	1.09336	0.4071
TC002RL110	I	20	0.647514	0.68629
TC002RL110	J	20	-0.650015	-0.0989317
TC002RL110	K	20	0.598929	-0.0939462
TC002RL110	L	20	-0.375648	0.399622
TC002RL110	M	20	-1.19303	-0.73708
TC002RL110	N	20	-1.04442	-0.597485
TC002RL110	O	20	-0.612861	-0.0341197
TC002RL110	P	20	0.673237	1.03279
TC002RL110	A	21	-0.364216	-0.031627
TC002RL110	B	21	0.578923	0.52426
TC002RL110	C	21	-0.152724	-0.677254
TC002RL110	D	21	-0.438524	1.36432
TC002RL110	E	21	-0.589997	0.195215
TC002RL110	F	21	0.233105	0.84832
TC002RL110	G	21	1.31628	-0.031627
TC002RL110	H	21	-0.149866	0.0905186
TC002RL110	I	21	-0.412802	-0.0490763
TC002RL110	J	21	1.00476	0.75858
TC002RL110	K	21	0.0330456	-0.0465836
TC002RL110	L	21	-0.169872	0.726174
TC002RL110	M	21	-0.790057	-0.702181
TC002RL110	N	21	0.0530515	0.327331
TC002RL110	O	21	1.23626	0.711218
TC002RL110	P	21	0.959036	0.900668
TC002RL110	A	22	1.05907	-0.515224
TC002RL110	B	22	0.813278	-0.265947
TC002RL110	C	22	0.381721	-0.550123
TC002RL110	D	22	-0.332778	-0.238527
TC002RL110	E	22	-0.670021	0.332317
TC002RL110	F	22	1.1791	0.167794
TC002RL110	G	22	0.124501	-0.00420654
TC002RL110	H	22	0.413159	0.491854
TC002RL110	I	22	-0.475678	-0.968907
TC002RL110	J	22	-0.761477	-0.418006
TC002RL110	K	22	-1.33308	-0.500267
TC002RL110	L	22	0.198809	-0.253483
TC002RL110	M	22	-1.53599	-0.814356
TC002RL110	N	22	-0.18702	-0.293368
TC002RL110	O	22	1.70212	0.529246
TC002RL110	P	22	-0.984401	0.257534
TC003RL110	A	3	-0.144953	0.431507
TC003RL110	B	3	0.88331	-0.440199
TC003RL110	C	3	-0.721232	0.294915
TC003RL110	D	3	0.380478	-0.0949936
TC003RL110	E	3	-0.865302	-0.507253
TC003RL110	F	3	1.82118	0.664955
TC003RL110	G	3	0.0245413	-0.393013
TC003RL110	H	3	0.736416	0.764295
TC003RL110	I	3	0.239234	0.0316645
TC003RL110	J	3	-0.492415	-0.273805
TC003RL110	K	3	0.826812	0.292431
TC003RL110	L	3	0.578221	-0.4551
TC003RL110	M	3	-0.192976	-0.303607
TC003RL110	N	3	-0.48959	-0.805272
TC003RL110	O	3	-0.0573808	-0.311057
TC003RL110	P	3	0.860711	0.133488
TC003RL110	A	4	0.857886	-0.281255
TC003RL110	B	4	0.129063	-0.201784
TC003RL110	C	4	-0.704283	-0.184399
TC003RL110	D	4	0.0697397	0.600384
TC003RL110	E	4	0.275957	-0.529605
TC003RL110	F	4	-0.274898	0.682339
TC003RL110	G	4	0.436976	0.371903
TC003RL110	H	4	0.33528	0.816448
TC003RL110	I	4	-0.204275	-0.19185
TC003RL110	J	4	0.123413	0.190608
TC003RL110	K	4	1.14885	0.414122
TC003RL110	L	4	0.753365	0.185641
TC003RL110	M	4	0.00194212	-0.879777
TC003RL110	N	4	-0.596936	-0.723317
TC003RL110	O	4	0.860711	1.21132
TC003RL110	P	4	1.09518	-0.281255
TC003RL110	A	5	1.2336	0.0664334
TC003RL110	B	5	0.880486	0.0788509
TC003RL110	C	5	0.0499654	-0.0130383
TC003RL110	D	5	-0.803154	0.868602
TC003RL110	E	5	-0.684508	-0.802789
TC003RL110	F	5	1.66863	0.664955
TC003RL110	G	5	-0.272073	-0.489869
TC003RL110	H	5	2.15169	0.615285
TC003RL110	I	5	0.143187	-0.467517
TC003RL110	J	5	-0.452867	0.262629
TC003RL110	K	5	-0.551738	0.116103
TC003RL110	L	5	0.578221	0.729526
TC003RL110	M	5	-0.885076	-1.23988
TC003RL110	N	5	0.239234	0.210476
TC003RL110	O	5	-0.404843	0.0068296
TC003RL110	P	5	1.02173	0.344585
TC003RL110	A	6	1.2449	0.111136
TC003RL110	B	6	0.533023	0.282497
TC003RL110	C	6	0.549972	-0.0974771
TC003RL110	D	6	0.985007	0.873568
TC003RL110	E	6	0.278782	-0.189366
TC003RL110	F	6	1.73078	0.727042
TC003RL110	G	6	-0.22405	-0.944348
TC003RL110	H	6	0.985007	0.178191
TC003RL110	I	6	-0.729707	-0.373145
TC003RL110	J	6	0.256183	-0.00558786
TC003RL110	K	6	0.242059	-0.782921
TC003RL110	L	6	0.589521	0.513462
TC003RL110	M	6	-1.40768	-0.0329063
TC003RL110	N	6	0.0584401	-0.633911
TC003RL110	O	6	-0.498065	0.304849
TC003RL110	P	6	0.391778	0.471243
TC003RL110	A	7	-0.136478	0.235311
TC003RL110	B	7	1.68276	0.381837
TC003RL110	C	7	1.0867	1.3802
TC003RL110	D	7	-0.0206571	1.0797
TC003RL110	E	7	0.34658	0.47621
TC003RL110	F	7	1.32964	0.565615
TC003RL110	G	7	-0.387894	-0.251454
TC003RL110	H	7	2.34378	-0.0478072
TC003RL110	I	7	0.852237	-0.328442
TC003RL110	J	7	0.736416	-0.0751257
TC003RL110	K	7	0.295732	0.106169
TC003RL110	L	7	0.951108	0.180674
TC003RL110	M	7	-0.887901	-0.904612
TC003RL110	N	7	-0.757956	-0.13473
TC003RL110	O	7	1.42852	0.749394
TC003RL110	P	7	1.97372	0.692274
TC003RL110	A	8	-0.133653	-0.0651917
TC003RL110	B	8	-0.125178	0.240278
TC003RL110	C	8	-0.444392	0.898403
TC003RL110	D	8	0.428502	1.01513
TC003RL110	E	8	0.448276	0.553198
TC003RL110	F	8	0.973707	0.212959
TC003RL110	G	8	1.17145	0.148389
TC003RL110	H	8	1.1658	0.578033
TC003RL110	I	8	1.02173	-0.29864
TC003RL110	J	8	1.324	-0.209234
TC003RL110	K	8	1.73078	-0.0602247
TC003RL110	L	8	0.400253	-0.445166
TC003RL110	M	8	-0.50089	-0.224135
TC003RL110	N	8	-0.537613	-0.0155218
TC003RL110	O	8	2.30706	-0.0701587
TC003RL110	P	8	1.03868	0.463792
TC003RL110	A	9	0.428502	-0.534572
TC003RL110	B	9	0.386128	0.950557
TC003RL110	C	9	-0.0856297	0.729526
TC003RL110	D	9	-0.190151	0.587967
TC003RL110	E	9	-0.831403	-0.589209
TC003RL110	F	9	1.47654	0.794097
TC003RL110	G	9	0.19686	-0.159564
TC003RL110	H	9	1.51891	0.791613
TC003RL110	I	9	0.549972	0.153356
TC003RL110	J	9	0.499124	-0.335892
TC003RL110	K	9	1.09518	0.0962353
TC003RL110	L	9	1.37202	0.712141
TC003RL110	M	9	-0.478291	-0.564374
TC003RL110	N	9	-0.729707	-0.447649
TC003RL110	O	9	0.583871	-0.383079
TC003RL110	P	9	0.866361	0.419089
TC003RL110	A	10	0.987832	-0.815206
TC003RL110	B	10	1.84378	1.07225
TC003RL110	C	10	-0.246649	0.292431
TC003RL110	D	10	0.510424	-0.0800926
TC003RL110	E	10	0.970882	0.0564995
TC003RL110	F	10	1.49066	0.222893
TC003RL110	G	10	0.880486	0.3272
TC003RL110	H	10	0.815513	0.59045
TC003RL110	I	10	0.154487	-0.330925
TC003RL110	J	10	1.10365	-0.296156
TC003RL110	K	10	1.06128	0.491111
TC003RL110	L	10	1.0867	0.299882
TC003RL110	M	10	-1.41616	-1.10577
TC003RL110	N	10	-0.859652	-0.114862
TC003RL110	O	10	0.374829	0.275047
TC003RL110	P	10	0.976532	0.759328
TC003RL110	A	11	0.420027	0.461309
TC003RL110	B	11	0.76184	0.366936
TC003RL110	C	11	0.247708	0.297398
TC003RL110	D	11	0.934159	-0.147147
TC003RL110	E	11	0.0640899	-0.127279
TC003RL110	F	11	1.91157	0.498561
TC003RL110	G	11	0.88896	0.841283
TC003RL110	H	11	0.49065	0.354519
TC003RL110	I	11	0.968058	0.361969
TC003RL110	J	11	0.499124	0.0788509
TC003RL110	K	11	0.18556	-0.189366
TC003RL110	L	11	0.561272	1.00768
TC003RL110	M	11	-0.433092	-0.976633
TC003RL110	N	11	-0.563038	0.0515325
TC003RL110	O	11	-0.797504	-0.0329063
TC003RL110	P	11	1.64886	-0.313541
TC003RL110	A	12	-0.142128	0.466276
TC003RL110	B	12	1.75055	1.54411
TC003RL110	C	12	0.61212	-0.467517
TC003RL110	D	12	0.0951638	-0.415364
TC003RL110	E	12	0.264658	0.662472
TC003RL110	F	12	1.37767	0.821415
TC003RL110	G	12	2.22514	-0.263871
TC003RL110	H	12	0.798563	0.463792
TC003RL110	I	12	0.832462	0.039115
TC003RL110	J	12	1.2223	0.714625
TC003RL110	K	12	1.18558	0.312299
TC003RL110	L	12	1.38332	-0.569341
TC003RL110	M	12	-1.79187	-0.517187
TC003RL110	N	12	-0.240999	0.0217306
TC003RL110	O	12	0.377654	-0.231586
TC003RL110	P	12	-0.450042	0.493594
TC003RL110	A	13	1.07823	1.13434
TC003RL110	B	13	0.578221	0.222893
TC003RL110	C	13	1.29292	-0.0428403
TC003RL110	D	13	0.855062	0.265113
TC003RL110	E	13	-0.64496	0.118587
TC003RL110	F	13	-0.277723	-0.941865
TC003RL110	G	13	0.420027	0.188125
TC003RL110	H	13	0.304206	0.555682
TC003RL110	I	13	0.694042	-0.0602247
TC003RL110	J	13	1.30705	-0.00807135
TC003RL110	K	13	0.061265	0.682339
TC003RL110	L	13	0.572572	0.513462
TC003RL110	M	13	-0.382244	-0.730768
TC003RL110	N	13	-0.918975	-0.159564
TC003RL110	O	13	0.863536	0.481177
TC003RL110	P	13	0.533023	-0.425298
TC003RL110	A	14	0.860711	0.111136
TC003RL110	B	14	-0.0912795	-0.00310437
TC003RL110	C	14	1.01043	0.049049
TC003RL110	D	14	0.230759	0.287464
TC003RL110	E	14	0.566922	-0.157081
TC003RL110	F	14	0.123413	0.0465655
TC003RL110	G	14	1.10365	0.299882
TC003RL110	H	14	1.00478	0.78913
TC003RL110	I	14	0.702517	-0.39798
TC003RL110	J	14	1.84095	-0.0155218
TC003RL110	K	14	0.931334	0.27753
TC003RL110	L	14	0.939809	-0.61156
TC003RL110	M	14	-1.32858	-0.589209
TC003RL110	N	14	0.533023	-0.0701587
TC003RL110	O	14	1.10365	0.771745
TC003RL110	P	14	0.549972	0.304849
TC003RL110	A	15	1.81835	-0.1993
TC003RL110	B	15	0.790089	0.324717
TC003RL110	C	15	1.07258	-0.30609
TC003RL110	D	15	-0.515014	-0.395496
TC003RL110	E	15	1.60366	0.101202
TC003RL110	F	15	-0.359645	0.48366
TC003RL110	G	15	2.04999	-0.517187
TC003RL110	H	15	-0.00653258	0.160806
TC003RL110	I	15	1.13755	0.667439
TC003RL110	J	15	1.19405	0.821415
TC003RL110	K	15	1.23925	0.399221
TC003RL110	L	15	0.920034	0.217926
TC003RL110	M	15	-0.64496	-0.4551
TC003RL110	N	15	-0.311622	-0.184399
TC003RL110	O	15	0.462401	-0.564374
TC003RL110	P	15	0.434152	-0.246487
TC003RL110	A	16	1.2562	0.394254
TC003RL110	B	16	0.575396	0.36942
TC003RL110	C	16	0.747715	0.513462
TC003RL110	D	16	-0.701458	0.605351
TC003RL110	E	16	1.0867	0.207992
TC003RL110	F	16	0.129063	0.446408
TC003RL110	G	16	1.23925	-0.137213
TC003RL110	H	16	1.36354	-0.179432
TC003RL110	I	16	1.34942	-0.288706
TC003RL110	J	16	0.428502	0.374387
TC003RL110	K	16	1.53869	-0.301123
TC003RL110	L	16	1.37767	0.00186262
TC003RL110	M	16	-0.0347816	-1.60744
TC003RL110	N	16	-0.322921	0.116103
TC003RL110	O	16	0.897435	-0.24897
TC003RL110	P	16	1.48501	0.0117966
TC003RL110	A	17	1.16863	0.853701
TC003RL110	B	17	1.78445	0.140938
TC003RL110	C	17	0.857886	0.183158
TC003RL110	D	17	-0.856827	-0.335892
TC003RL110	E	17	0.945458	-0.224135
TC003RL110	F	17	1.47371	-0.214201
TC003RL110	G	17	1.32964	0.530846
TC003RL110	H	17	1.77598	-0.234069
TC003RL110	I	17	0.157311	-0.229102
TC003RL110	J	17	1.2675	-0.353277
TC003RL110	K	17	0.775964	-0.0925101
TC003RL110	L	17	0.160136	-0.0825761
TC003RL110	M	17	-0.36247	-0.360727
TC003RL110	N	17	0.931334	-0.0925101
TC003RL110	O	17	0.713817	0.776712
TC003RL110	P	17	1.72795	0.496078
TC003RL110	A	18	0.146012	0.836316
TC003RL110	B	18	-0.00653258	0.53333
TC003RL110	C	18	0.462401	-0.181916
TC003RL110	D	18	-0.2071	0.0962353
TC003RL110	E	18	-0.184501	1.50189
TC003RL110	F	18	0.21381	0.42654
TC003RL110	G	18	2.16864	0.235311
TC003RL110	H	18	1.16298	-0.114862
TC003RL110	I	18	1.9257	-0.782921
TC003RL110	J	18	0.682743	0.602868
TC003RL110	K	18	0.996306	1.09708
TC003RL110	L	18	1.2562	1.06728
TC003RL110	M	18	-1.25796	-0.782921
TC003RL110	N	18	-0.0941044	-1.2076
TC003RL110	O	18	0.677093	0.347068
TC003RL110	P	18	1.1319	1.22126
TC003RL110	A	19	1.34377	0.347068
TC003RL110	B	19	0.646019	0.106169
TC003RL110	C	19	1.11778	-0.546989
TC003RL110	D	19	-0.684508	0.605351
TC003RL110	E	19	0.597996	0.116103
TC003RL110	F	19	1.49066	0.394254
TC003RL110	G	19	-0.9105	0.558165
TC003RL110	H	19	1.46806	0.215443
TC003RL110	I	19	0.459576	-0.66123
TC003RL110	J	19	0.259008	-0.276288
TC003RL110	K	19	0.281607	0.252695
TC003RL110	L	19	1.27315	0.265113
TC003RL110	M	19	-0.297497	-1.16786
TC003RL110	N	19	0.400253	-0.0751257
TC003RL110	O	19	1.10365	-0.0999606
TC003RL110	P	19	0.626245	-0.174465
TC003RL110	A	20	-0.176027	0.391771
TC003RL110	B	20	0.849412	0.280014
TC003RL110	C	20	0.120588	0.717109
TC003RL110	D	20	0.281607	-0.586725
TC003RL110	E	20	1.0528	0.118587
TC003RL110	F	20	0.369179	-0.442682
TC003RL110	G	20	0.846587	0.776712
TC003RL110	H	20	1.53586	0.0117966
TC003RL110	I	20	0.301381	-1.5379
TC003RL110	J	20	4.02177	1.04493
TC003RL110	K	20	0.597996	0.307332
TC003RL110	L	20	0.264658	-0.393013
TC003RL110	M	20	0.843762	-0.805272
TC003RL110	N	20	-0.565863	-0.494836
TC003RL110	O	20	1.7223	0.188125
TC003RL110	P	20	-0.365295	-0.0279393
TC003RL110	A	21	0.880486	0.463792
TC003RL110	B	21	1.16298	-0.0155218
TC003RL110	C	21	-0.749481	-0.636395
TC003RL110	D	21	0.0923389	0.257662
TC003RL110	E	21	2.06129	0.034148
TC003RL110	F	21	0.210985	-0.0453237
TC003RL110	G	21	0.0640899	-0.517187
TC003RL110	H	21	0.586696	0.215443
TC003RL110	I	21	0.177086	-0.929447
TC003RL110	J	21	0.360704	-0.244003
TC003RL110	K	21	1.06975	0.851217
TC003RL110	L	21	0.386128	0.669922
TC003RL110	M	21	0.033016	-0.435232
TC003RL110	N	21	-1.18169	-0.29864
TC003RL110	O	21	1.65451	-0.251454
TC003RL110	P	21	1.71101	0.0366315
TC003RL110	A	22	0.177086	0.329684
TC003RL110	B	22	0.942633	1.00271
TC003RL110	C	22	0.597996	0.302365
TC003RL110	D	22	0.321156	0.429023
TC003RL110	E	22	-0.418968	0.684823
TC003RL110	F	22	-0.00370768	-0.370661
TC003RL110	G	22	0.0669148	-0.0155218
TC003RL110	H	22	-0.49524	-0.678614
TC003RL110	I	22	0.832462	0.391771
TC003RL110	J	22	-0.226875	-0.169498
TC003RL110	K	22	0.730766	-0.777954
TC003RL110	L	22	0.996306	-0.40543
TC003RL110	M	22	-0.596936	-0.308574
TC003RL110	N	22	-0.314447	-0.651296
TC003RL110	O	22	0.976532	-0.626461
TC003RL110	P	22	1.49631	-0.112378
TC004RL110	A	3	0.465658	0.948923
TC004RL110	B	3	1.35684	0.871583
TC004RL110	C	3	-0.107247	-0.307849
TC004RL110	D	3	0.177822	0.388209
TC004RL110	E	3	-1.75677	-1.14409
TC004RL110	F	3	0.678767	0.71932
TC004RL110	G	3	-0.693989	-0.605123
TC004RL110	H	3	0.471193	1.03593
TC004RL110	I	3	-0.782554	-0.0299087
TC004RL110	J	3	-0.359103	-0.44561
TC004RL110	K	3	0.177822	0.463132
TC004RL110	L	3	-0.0906407	0.347123
TC004RL110	M	3	0.0947921	0.644397
TC004RL110	N	3	-1.59901	-0.428692
TC004RL110	O	3	0.465658	0.0329298
TC004RL110	P	3	1.25444	0.0933515
TC004RL110	A	4	0.0172978	0.00392741
TC004RL110	B	4	1.45648	0.736238
TC004RL110	C	4	-0.871119	0.274616
TC004RL110	D	4	-0.419992	0.791826
TC004RL110	E	4	-0.525162	-0.48428
TC004RL110	F	4	0.725817	0.48005
TC004RL110	G	4	0.471193	0.0764334
TC004RL110	H	4	1.67512	0.55739
TC004RL110	I	4	-1.2918	-0.44561
TC004RL110	J	4	0.402002	0.622645
TC004RL110	K	4	0.759029	1.35737
TC004RL110	L	4	0.125236	0.743489
TC004RL110	M	4	-1.26966	-1.25284
TC004RL110	N	4	0.271922	-0.0468268
TC004RL110	O	4	0.515475	0.4728
TC004RL110	P	4	0.651091	0.750739
TC004RL110	A	5	0.866968	0.741072
TC004RL110	B	5	0.269154	0.383376
TC004RL110	C	5	-0.0851053	-0.109665
TC004RL110	D	5	-0.0657318	0.690318
TC004RL110	E	5	-0.295447	-1.02082
TC004RL110	F	5	0.936159	0.685484
TC004RL110	G	5	-0.926472	0.0788503
TC004RL110	H	5	2.76004	0.115103
TC004RL110	I	5	-0.566677	0.31812
TC004RL110	J	5	-0.425527	0.847414
TC004RL110	K	5	0.269154	0.932005
TC004RL110	L	5	1.33747	0.0546816
TC004RL110	M	5	-0.998431	-1.05949
TC004RL110	N	5	0.158448	-0.817808
TC004RL110	O	5	-0.121085	1.60148
TC004RL110	P	5	2.42516	0.250448
TC004RL110	A	6	0.343881	0.327788
TC004RL110	B	6	0.966603	0.494551
TC004RL110	C	6	0.742423	0.277033
TC004RL110	D	6	1.13266	1.22686
TC004RL110	E	6	3.35509	1.76099
TC004RL110	F	6	0.55699	0.289118
TC004RL110	G	6	-0.273306	0.385792
TC004RL110	H	6	1.39005	0.646814
TC004RL110	I	6	0.0892568	1.87458
TC004RL110	J	6	0.277457	0.43413
TC004RL110	K	6	0.00899487	0.944089
TC004RL110	L	6	1.70003	-0.24501
TC004RL110	M	6	-0.20965	-0.670379
TC004RL110	N	6	0.0422067	1.39604
TC004RL110	O	6	0.523779	0.786992
TC004RL110	P	6	0.247013	0.163441
TC004RL110	A	7	0.634485	0.308453
TC004RL110	B	7	0.244245	0.973091
TC004RL110	C	7	0.197195	0.315703
TC004RL110	D	7	1.5229	0.315703
TC004RL110	E	7	-0.267771	-0.150752
TC004RL110	F	7	0.850362	0.349539
TC004RL110	G	7	0.0864892	0.0135949
TC004RL110	H	7	0.761797	0.905419
TC004RL110	I	7	-0.0906407	0.15619
TC004RL110	J	7	1.28488	0.255282
TC004RL110	K	7	0.152913	1.24861
TC004RL110	L	7	0.7701	1.16644
TC004RL110	M	7	-1.11744	-0.375521
TC004RL110	N	7	-0.547304	0.63473
TC004RL110	O	7	-0.342497	0.231113
TC004RL110	P	7	0.922321	0.765241
TC004RL110	A	8	0.0781862	0.301202
TC004RL110	B	8	0.565293	-0.20634
TC004RL110	C	8	-0.33973	-0.334434
TC004RL110	D	8	0.346649	0.695151
TC004RL110	E	8	0.263619	0.581559
TC004RL110	F	8	0.631717	0.322954
TC004RL110	G	8	77.0356	63.8672
TC004RL110	H	8	2.29784	0.388209
TC004RL110	I	8	0.421375	1.43471
TC004RL110	J	8	-0.422759	0.11027
TC004RL110	K	8	1.22123	0.574308
TC004RL110	L	8	0.803311	0.460715
TC004RL110	M	8	-0.61096	-0.177338
TC004RL110	N	8	-0.840675	0.306036
TC004RL110	O	8	-0.289912	0.494551
TC004RL110	P	8	-0.121085	0.538055
TC004RL110	A	9	-0.0684994	0.784576
TC004RL110	B	9	1.10775	-0.00815693
TC004RL110	C	9	-0.699524	-0.339268
TC004RL110	D	9	1.89377	-0.0951642
TC004RL110	E	9	-0.680151	0.992426
TC004RL110	F	9	-0.0408229	0.383376
TC004RL110	G	9	-1.00673	0.832913
TC004RL110	H	9	-0.22072	0.397877
TC004RL110	I	9	-1.10637	-0.158003
TC004RL110	J	9	-1.07316	-0.469779
TC004RL110	K	9	0.103095	-0.112082
TC004RL110	L	9	-0.0823377	0.917503
TC004RL110	M	9	-0.195811	-0.0395762
TC004RL110	N	9	-1.28903	-0.20634
TC004RL110	O	9	-0.57498	0.840163
TC004RL110	P	9	0.0145302	0.716903
TC004RL110	A	10	0.952765	0.770074
TC004RL110	B	10	-4.52165	-1.69513
TC004RL110	C	10	0.628949	0.702402
TC004RL110	D	10	1.57272	0.852248
TC004RL110	E	10	0.222104	-0.174921
TC004RL110	F	10	0.526546	0.750739
TC004RL110	G	10	1.04686	0.813578
TC004RL110	H	10	0.803311	0.516303
TC004RL110	I	10	-3.0631	-1.12717
TC004RL110	J	10	0.0366714	-0.404523
TC004RL110	K	10	1.71387	0.458298
TC004RL110	L	10	0.343881	-0.373104
TC004RL110	M	10	-0.743807	-0.281263
TC004RL110	N	10	0.576364	0.0788503
TC004RL110	O	10	-0.2567	0.980342
TC004RL110	P	10	-0.181973	-0.0154075
TC004RL110	A	11	-0.406153	1.36946
TC004RL110	B	11	0.565293	0.407544
TC004RL110	C	11	0.28576	-0.467362
TC004RL110	D	11	-0.217953	-0.358603
TC004RL110	E	11	1.12159	-0.0927473
TC004RL110	F	11	0.955532	0.0812672
TC004RL110	G	11	1.28765	0.859498
TC004RL110	H	11	1.15204	0.68065
TC004RL110	I	11	0.689838	0.376125
TC004RL110	J	11	0.761797	-0.25226
TC004RL110	K	11	0.822685	0.153773
TC004RL110	L	11	0.866968	0.011178
TC004RL110	M	11	-0.087873	-0.0564943
TC004RL110	N	11	0.581899	0.185193
TC004RL110	O	11	0.0588126	-0.230509
TC004RL110	P	11	1.38729	0.702402
TC004RL110	A	12	0.579132	0.136855
TC004RL110	B	12	0.936159	0.322954
TC004RL110	C	12	-0.0463582	0.168274
TC004RL110	D	12	-0.096176	0.204527
TC004RL110	E	12	0.0228331	0.562224
TC004RL110	F	12	1.27104	0.980342
TC004RL110	G	12	0.50994	0.226279
TC004RL110	H	12	3.78961	0.344706
TC004RL110	I	12	0.388163	0.380959
TC004RL110	J	12	0.565293	0.281867
TC004RL110	K	12	0.706444	0.223862
TC004RL110	L	12	0.343881	0.342289
TC004RL110	M	12	-0.580515	-0.909648
TC004RL110	N	12	-1.12574	0.206944
TC004RL110	O	12	0.0145302	0.465549
TC004RL110	P	12	1.43157	1.32354
TC004RL110	A	13	0.00345957	0.828079
TC004RL110	B	13	0.628949	0.281867
TC004RL110	C	13	0.446284	0.506636
TC004RL110	D	13	-0.0380552	0.422046
TC004RL110	E	13	0.728585	-0.20634
TC004RL110	F	13	0.529314	1.15436
TC004RL110	G	13	1.27658	-0.102415
TC004RL110	H	13	1.00258	1.09394
TC004RL110	I	13	0.385396	-0.0685786
TC004RL110	J	13	1.17418	0.678233
TC004RL110	K	13	2.02938	0.422046
TC004RL110	L	13	1.11606	0.690318
TC004RL110	M	13	0.426911	0.451048
TC004RL110	N	13	-0.732736	0.066766
TC004RL110	O	13	-0.30375	0.91992
TC004RL110	P	13	0.731352	0.801494
TC004RL110	A	14	1.59763	0.204527
TC004RL110	B	14	1.08838	0.368874
TC004RL110	C	14	-0.743807	0.383376
TC004RL110	D	14	2.46944	2.26612
TC004RL110	E	14	-0.312053	0.298785
TC004RL110	F	14	0.485031	0.876417
TC004RL110	G	14	0.861432	0.429296
TC004RL110	H	14	1.32086	0.197277
TC004RL110	I	14	-0.253932	-0.510865
TC004RL110	J	14	1.53397	1.29937
TC004RL110	K	14	1.75262	0.361624
TC004RL110	L	14	1.58656	0.308453
TC004RL110	M	14	-1.25859	0.542889
TC004RL110	N	14	0.0809539	0.322954
TC004RL110	O	14	0.119701	0.0498479
TC004RL110	P	14	2.45006	0.731405
TC004RL110	A	15	-0.0740347	0.284284
TC004RL110	B	15	2.05983	1.15194
TC004RL110	C	15	0.507173	-0.385188
TC004RL110	D	15	42.5866	35.7373
TC004RL110	E	15	0.338346	0.306036
TC004RL110	F	15	0.130772	-0.0299087
TC004RL110	G	15	-0.265003	-0.112082
TC004RL110	H	15	0.152913	0.625062
TC004RL110	I	15	-0.469809	-0.0564943
TC004RL110	J	15	1.67789	1.90842
TC004RL110	K	15	-0.289912	0.559807
TC004RL110	L	15	0.853129	-0.0903304
TC004RL110	M	15	-0.0352876	0.0425973
TC004RL110	N	15	-0.912634	-0.191839
TC004RL110	O	15	0.717514	-0.0879135
TC004RL110	P	15	0.963835	1.14711
TC004RL110	A	16	0.0394391	0.707236
TC004RL110	B	16	-0.267771	0.0546816
TC004RL110	C	16	1.04686	0.303619
TC004RL110	D	16	1.16311	0.146523
TC004RL110	E	16	0.612343	0.939255
TC004RL110	F	16	-0.0906407	0.559807
TC004RL110	G	16	0.346649	0.0135949
TC004RL110	H	16	0.598505	1.31145
TC004RL110	I	16	0.166751	0.51872
TC004RL110	J	16	0.485031	0.107853
TC004RL110	K	16	0.382628	1.50722
TC004RL110	L	16	1.27104	0.745906
TC004RL110	M	16	-0.685686	-1.02566
TC004RL110	N	16	-0.298215	-0.578538
TC004RL110	O	16	1.17971	-0.124167
TC004RL110	P	16	1.07731	0.405127
TC004RL110	A	17	0.792241	1.05285
TC004RL110	B	17	1.37345	0.103019
TC004RL110	C	17	0.902947	0.148939
TC004RL110	D	17	0.482264	0.308453
TC004RL110	E	17	1.26828	0.622645
TC004RL110	F	17	0.673232	0.378542
TC004RL110	G	17	0.548687	0.11752
TC004RL110	H	17	1.51737	0.187609
TC004RL110	I	17	0.925088	-0.0444099
TC004RL110	J	17	-0.431062	0.675817
TC004RL110	K	17	0.19166	1.01901
TC004RL110	L	17	1.55611	0.35679
TC004RL110	M	17	0.634485	-0.353769
TC004RL110	N	17	0.0311361	1.30904
TC004RL110	O	17	0.534849	0.245614
TC004RL110	P	17	-0.229023	1.25828
TC004RL110	A	18	-0.317588	-0.133834
TC004RL110	B	18	0.91125	0.649231
TC004RL110	C	18	0.244245	0.504219
TC004RL110	D	18	0.41584	-0.114499
TC004RL110	E	18	0.623414	0.617812
TC004RL110	F	18	-0.1626	0.144106
TC004RL110	G	18	0.789473	1.00451
TC004RL110	H	18	1.37898	0.815995
TC004RL110	I	18	1.37068	0.330205
TC004RL110	J	18	0.664929	0.228696
TC004RL110	K	18	0.839291	-0.158003
TC004RL110	L	18	0.822685	1.12777
TC004RL110	M	18	-0.370174	-0.3296
TC004RL110	N	18	0.736888	-0.841976
TC004RL110	O	18	1.01642	0.552556
TC004RL110	P	18	0.224872	1.27037
TC004RL110	A	19	2.10134	0.182776
TC004RL110	B	19	0.850362	0.815995
TC004RL110	C	19	0.767332	0.223862
TC004RL110	D	19	-0.336962	0.359207
TC004RL110	E	19	1.18248	-0.385188
TC004RL110	F	19	0.0615803	0.047431
TC004RL110	G	19	1.59763	0.815995
TC004RL110	H	19	-0.087873	0.235947
TC004RL110	I	19	0.402002	0.262532
TC004RL110	J	19	0.199963	0.854665
TC004RL110	K	19	1.83011	-0.119333
TC004RL110	L	19	-0.0103787	-0.0395762
TC004RL110	M	19	0.0311361	-0.399689
TC004RL110	N	19	-0.965219	-0.0903304
TC004RL110	O	19	0.00345957	0.267366
TC004RL110	P	19	0.0311361	0.605727
TC004RL110	A	20	1.16864	1.61598
TC004RL110	B	20	0.905715	-0.136251
TC004RL110	C	20	-0.779787	0.148939
TC004RL110	D	20	-0.489183	0.221445
TC004RL110	E	20	0.357719	0.658899
TC004RL110	F	20	0.00622722	0.161024
TC004RL110	G	20	0.908482	0.741072
TC004RL110	H	20	1.27381	1.67157
TC004RL110	I	20	-0.284376	0.0885178
TC004RL110	J	20	0.681535	0.264949
TC004RL110	K	20	0.745191	0.702402
TC004RL110	L	20	0.346649	-0.0999979
TC004RL110	M	20	-1.09253	-0.0709955
TC004RL110	N	20	-2.51787	-0.648627
TC004RL110	O	20	0.0754186	0.808744
TC004RL110	P	20	0.280225	1.0746
TC004RL110	A	21	0.111398	0.115103
TC004RL110	B	21	0.739655	0.0160118
TC004RL110	C	21	-0.491951	0.163441
TC004RL110	D	21	1.4371	0.228696
TC004RL110	E	21	-0.533465	0.852248
TC004RL110	F	21	0.186125	-0.119333
TC004RL110	G	21	0.208266	0.0981852
TC004RL110	H	21	-0.530698	0.047431
TC004RL110	I	21	0.482264	0.424462
TC004RL110	J	21	0.609576	-0.0540774
TC004RL110	K	21	-0.500253	-0.0178244
TC004RL110	L	21	-0.181973	0.944089
TC004RL110	M	21	-1.82042	-0.344102
TC004RL110	N	21	-0.198579	0.354373
TC004RL110	O	21	-0.0186817	-0.249844
TC004RL110	P	21	1.12436	0.709653
TC004RL110	A	22	1.11052	0.426879
TC004RL110	B	22	-0.245629	0.27945
TC004RL110	C	22	-0.348032	0.364041
TC004RL110	D	22	-1.17003	-0.600289
TC004RL110	E	22	0.739655	0.438964
TC004RL110	F	22	0.393699	0.559807
TC004RL110	G	22	0.772867	-0.218424
TC004RL110	H	22	0.930624	0.820829
TC004RL110	I	22	1.60593	1.34045
TC004RL110	J	22	-0.680151	-0.0129907
TC004RL110	K	22	-0.0518935	0.141689
TC004RL110	L	22	-0.0352876	0.883667
TC004RL110	M	22	-0.655242	-0.339268
TC004RL110	N	22	-1.89238	0.238364
TC004RL110	O	22	-0.378477	-0.334434
TC004RL110	P	22	0.819917	0.617812
TC005RL110	A	3	-1.0056	0.121905
TC005RL110	B	3	-1.03612	-0.397749
TC005RL110	C	3	-1.85183	0.124278
TC005RL110	D	3	-1.31634	0.769693
TC005RL110	E	3	-2.10709	-0.651644
TC005RL110	F	3	0.381672	0.323597
TC005RL110	G	3	-1.39403	-0.0536857
TC005RL110	H	3	0.467683	0.610712
TC005RL110	I	3	-1.82686	-0.639779
TC005RL110	J	3	-1.13322	-0.219785
TC005RL110	K	3	-0.958429	1.05444
TC005RL110	L	3	2.97586	0.27614
TC005RL110	M	3	-1.4301	0.380546
TC005RL110	N	3	2.18235	-0.226904
TC005RL110	O	3	-1.94339	0.124278
TC005RL110	P	3	2.93702	0.197836
TC005RL110	A	4	-1.37738	0.119532
TC005RL110	B	4	-1.34686	-0.0418215
TC005RL110	C	4	-1.68536	0.029364
TC005RL110	D	4	-0.631034	0.582238
TC005RL110	E	4	-1.46617	-0.483171
TC005RL110	F	4	-0.298089	-0.305208
TC005RL110	G	4	-0.348031	-0.136735
TC005RL110	H	4	0.217974	0.44224
TC005RL110	I	4	-0.950105	-0.231649
TC005RL110	J	4	-0.348031	0.311733
TC005RL110	K	4	-1.73807	-0.127244
TC005RL110	L	4	2.07137	0.250039
TC005RL110	M	4	-1.98223	0.627322
TC005RL110	N	4	1.22513	-0.594695
TC005RL110	O	4	-1.8768	-0.298089
TC005RL110	P	4	2.06304	0.824268
TC005RL110	A	5	-1.43842	1.42223
TC005RL110	B	5	-0.0428319	0.980876
TC005RL110	C	5	-1.77969	0.610712
TC005RL110	D	5	-0.47566	0.121905
TC005RL110	E	5	0.523173	1.36528
TC005RL110	F	5	0.0320806	0.368681
TC005RL110	G	5	-1.83518	0.534781
TC005RL110	H	5	-0.00953747	-0.397749
TC005RL110	I	5	-1.2997	-0.32419
TC005RL110	J	5	0.648027	0.461222
TC005RL110	K	5	-1.49946	-0.39063
TC005RL110	L	5	2.29888	0.698507
TC005RL110	M	5	-2.22639	0.221565
TC005RL110	N	5	1.01149	-0.305208
TC005RL110	O	5	-0.481209	0.551391
TC005RL110	P	5	2.05472	0.356817
TC005RL110	A	6	-2.05437	-0.623169
TC005RL110	B	6	0.187455	0.0530925
TC005RL110	C	6	-1.82408	0.0530925
TC005RL110	D	6	-0.680975	0.0981766
TC005RL110	E	6	-3.42777	0.266649
TC005RL110	F	6	-0.0983226	0.461222
TC005RL110	G	6	-2.50385	0.0103812
TC005RL110	H	6	1.26675	0.582238
TC005RL110	I	6	-2.66477	-0.105888
TC005RL110	J	6	-0.0955481	0.349699
TC005RL110	K	6	-1.66316	0.261903
TC005RL110	L	6	0.242945	-0.0774142
TC005RL110	M	6	-4.00209	-0.611305
TC005RL110	N	6	1.76062	0.162244
TC005RL110	O	6	-1.29692	0.598848
TC005RL110	P	6	0.384447	1.08291
TC005RL110	A	7	-1.32189	0.280886
TC005RL110	B	7	-0.839124	0.231056
TC005RL110	C	7	-0.153813	1.25613
TC005RL110	D	7	-0.250922	0.753083
TC005RL110	E	7	-1.19426	-0.172328
TC005RL110	F	7	1.15854	0.698507
TC005RL110	G	7	-0.822477	0.461222
TC005RL110	H	7	1.30837	0.610712
TC005RL110	I	7	-1.40513	0.795794
TC005RL110	J	7	-0.631034	0.598848
TC005RL110	K	7	-4.0881	-2.40043
TC005RL110	L	7	0.986521	0.145634
TC005RL110	M	7	-2.93112	-1.09537
TC005RL110	N	7	2.36269	0.254785
TC005RL110	O	7	-1.50501	0.859861
TC005RL110	P	7	0.628606	-0.236395
TC005RL110	A	8	-0.656004	-0.117753
TC005RL110	B	8	-1.16929	0.0720753
TC005RL110	C	8	-1.40236	0.34258
TC005RL110	D	8	-0.539474	-0.0940241
TC005RL110	E	8	-2.04882	0.30936
TC005RL110	F	8	2.34604	3.42016
TC005RL110	G	8	-1.39403	-0.0347029
TC005RL110	H	8	0.628606	0.240547
TC005RL110	I	8	-1.69091	0.496815
TC005RL110	J	8	-0.278667	-0.497408
TC005RL110	K	8	-0.733691	-0.0109744
TC005RL110	L	8	-0.381325	0.0934309
TC005RL110	M	8	-1.56605	0.0958038
TC005RL110	N	8	2.37101	-0.193684
TC005RL110	O	8	-1.65206	0.0649567
TC005RL110	P	8	1.80224	0.188345
TC005RL110	A	9	-1.12213	0.114787
TC005RL110	B	9	-0.794731	0.0958038
TC005RL110	C	9	-0.780859	0.200209
TC005RL110	D	9	-1.01669	0.223938
TC005RL110	E	9	-2.03217	-0.426223
TC005RL110	F	9	-0.348031	0.603593
TC005RL110	G	9	-0.916811	-0.113007
TC005RL110	H	9	-0.0955481	0.435121
TC005RL110	I	9	-1.34409	-0.0347029
TC005RL110	J	9	-0.958429	-0.58995
TC005RL110	K	9	-1.00282	0.029364
TC005RL110	L	9	-0.187108	0.311733
TC005RL110	M	9	-3.03656	-0.530628
TC005RL110	N	9	2.56801	0.579865
TC005RL110	O	9	-1.51334	-0.0869056
TC005RL110	P	9	0.553693	0.624949
TC005RL110	A	10	-0.0567046	0.247666
TC005RL110	B	10	-1.18039	0.333089
TC005RL110	C	10	-2.64812	0.00326267
TC005RL110	D	10	-0.744789	0.556136
TC005RL110	E	10	-0.47011	-0.124871
TC005RL110	F	10	0.473232	-0.11538
TC005RL110	G	10	-0.644906	0.261903
TC005RL110	H	10	-0.209304	-0.04894
TC005RL110	I	10	-0.0789009	-0.101143
TC005RL110	J	10	-0.492307	-0.105888
TC005RL110	K	10	-0.705946	0.252412
TC005RL110	L	10	-1.4301	-0.150973
TC005RL110	M	10	-3.49436	-0.293343
TC005RL110	N	10	1.43045	-0.321818
TC005RL110	O	10	-1.49114	-0.0536857
TC005RL110	P	10	0.00988428	0.71749
TC005RL110	A	11	-1.63264	-0.0631771
TC005RL110	B	11	-2.36512	-0.630288
TC005RL110	C	11	-1.96836	-0.0133473
TC005RL110	D	11	-1.72143	0.352071
TC005RL110	E	11	-1.64651	0.183599
TC005RL110	F	11	-1.2664	0.494442
TC005RL110	G	11	33.3293	28.5652
TC005RL110	H	11	0.811725	0.957148
TC005RL110	I	11	-1.52443	-0.416731
TC005RL110	J	11	-0.819702	-0.47368
TC005RL110	K	11	-1.36629	0.655796
TC005RL110	L	11	-0.436816	0.44224
TC005RL110	M	11	-3.35285	0.0103812
TC005RL110	N	11	1.23345	-0.219785
TC005RL110	O	11	-1.91564	-0.0987698
TC005RL110	P	11	-0.658779	-1.46553
TC005RL110	A	12	-1.41623	0.0649567
TC005RL110	B	12	0.2152	1.16833
TC005RL110	C	12	-1.23588	0.674779
TC005RL110	D	12	-1.18871	1.46968
TC005RL110	E	12	-0.755888	0.302242
TC005RL110	F	12	-1.7242	0.603593
TC005RL110	G	12	-0.373002	-0.471307
TC005RL110	H	12	0.634155	0.501561
TC005RL110	I	12	-0.980625	0.40902
TC005RL110	J	12	-1.85738	-0.30758
TC005RL110	K	12	-0.794731	0.145634
TC005RL110	L	12	-0.400747	0.44224
TC005RL110	M	12	-1.24421	-0.751303
TC005RL110	N	12	0.0792477	0.61783
TC005RL110	O	12	-1.04999	0.530035
TC005RL110	P	12	0.148611	-0.461816
TC005RL110	A	13	-0.625484	0.439867
TC005RL110	B	13	-1.18317	-0.305208
TC005RL110	C	13	0.492654	-0.150973
TC005RL110	D	13	-0.289766	0.254785
TC005RL110	E	13	-1.03057	-0.00385588
TC005RL110	F	13	-1.49669	0.847997
TC005RL110	G	13	-0.284216	0.931046
TC005RL110	H	13	-1.96281	0.779184
TC005RL110	I	13	-1.7131	0.145634
TC005RL110	J	13	-3.01991	-0.941131
TC005RL110	K	13	-0.220402	1.54087
TC005RL110	L	13	-0.692073	0.119532
TC005RL110	M	13	-2.47887	-0.509273
TC005RL110	N	13	-0.44514	-0.5069
TC005RL110	O	13	-1.02502	0.781557
TC005RL110	P	13	0.831147	0.349699
TC005RL110	A	14	-1.10548	0.909691
TC005RL110	B	14	-0.933458	-0.193684
TC005RL110	C	14	-2.66754	-0.253005
TC005RL110	D	14	-0.126068	0.34258
TC005RL110	E	14	-1.91287	1.08054
TC005RL110	F	14	-0.0955481	0.207328
TC005RL110	G	14	-1.21646	0.0981766
TC005RL110	H	14	-0.900164	0.608339
TC005RL110	I	14	-1.94339	-0.760795
TC005RL110	J	14	-2.32073	-0.430969
TC005RL110	K	14	-0.852996	-0.533001
TC005RL110	L	14	-1.76027	-0.321818
TC005RL110	M	14	-0.925134	0.114787
TC005RL110	N	14	-1.04721	-0.720456
TC005RL110	O	14	-1.21369	0.494442
TC005RL110	P	14	-0.167686	0.764947
TC005RL110	A	15	-0.489532	0.117159
TC005RL110	B	15	-0.797506	1.18731
TC005RL110	C	15	-0.0206356	0.541899
TC005RL110	D	15	-0.866869	-0.594695
TC005RL110	E	15	-1.67981	0.413766
TC005RL110	F	15	-1.01114	0.660542
TC005RL110	G	15	0.903285	0.838505
TC005RL110	H	15	0.406643	0.356817
TC005RL110	I	15	-1.24698	0.572746
TC005RL110	J	15	-0.619935	-0.00860158
TC005RL110	K	15	13.5136	13.1061
TC005RL110	L	15	-0.614386	1.28223
TC005RL110	M	15	-2.182	-0.703846
TC005RL110	N	15	-1.17762	0.285632
TC005RL110	O	15	3.42534	0.209701
TC005RL110	P	15	-0.434042	-0.559102
TC005RL110	A	16	-1.66594	0.354444
TC005RL110	B	16	-2.182	0.107668
TC005RL110	C	16	-1.07218	0.674779
TC005RL110	D	16	-1.55773	0.254785
TC005RL110	E	16	1.73565	0.437494
TC005RL110	F	16	-0.250922	0.791048
TC005RL110	G	16	-0.511729	0.499188
TC005RL110	H	16	-0.386874	-0.155718
TC005RL110	I	16	-0.711495	-0.35741
TC005RL110	J	16	-1.84351	-0.52351
TC005RL110	K	16	-2.05992	0.076821
TC005RL110	L	16	-2.13483	0.316479
TC005RL110	M	16	-2.50662	0.32597
TC005RL110	N	16	-1.59935	-0.637406
TC005RL110	O	16	-0.95288	-0.404867
TC005RL110	P	16	0.201327	0.757829
TC005RL110	A	17	-1.20814	0.461222
TC005RL110	B	17	-2.22084	0.70088
TC005RL110	C	17	-1.76859	0.188345
TC005RL110	D	17	-1.17207	0.539527
TC005RL110	E	17	0.956001	2.47577
TC005RL110	F	17	-1.72975	0.216819
TC005RL110	G	17	-0.972302	-0.0323301
TC005RL110	H	17	0.467683	0.731727
TC005RL110	I	17	-0.761437	-0.079787
TC005RL110	J	17	-0.789182	0.401901
TC005RL110	K	17	-0.9834	0.788676
TC005RL110	L	17	-0.497856	1.02359
TC005RL110	M	17	-1.62987	0.30936
TC005RL110	N	17	-0.822477	0.223938
TC005RL110	O	17	-0.900164	0.0744481
TC005RL110	P	17	-1.30525	0.174108
TC005RL110	A	18	-1.20814	0.764947
TC005RL110	B	18	-0.569994	0.890708
TC005RL110	C	18	-2.29298	-0.155718
TC005RL110	D	18	-1.01392	0.608339
TC005RL110	E	18	-2.25969	0.603593
TC005RL110	F	18	-0.628259	-0.0347029
TC005RL110	G	18	0.395545	0.202582
TC005RL110	H	18	-0.53115	0.586983
TC005RL110	I	18	-2.1598	0.738846
TC005RL110	J	18	-1.26085	1.25138
TC005RL110	K	18	-0.814153	0.662915
TC005RL110	L	18	-0.453463	0.461222
TC005RL110	M	18	-2.36512	-0.789269
TC005RL110	N	18	-1.69368	-0.416731
TC005RL110	O	18	-0.481209	1.00223
TC005RL110	P	18	-0.889065	0.204955
TC005RL110	A	19	-1.28305	0.378173
TC005RL110	B	19	-0.309187	-0.668253
TC005RL110	C	19	-1.52443	3.05237
TC005RL110	D	19	-1.81576	0.456477
TC005RL110	E	19	-1.31079	0.480205
TC005RL110	F	19	-3.26129	-0.186565
TC005RL110	G	19	-1.1582	-0.00385588
TC005RL110	H	19	-1.82131	0.0934309
TC005RL110	I	19	-1.57715	0.166989
TC005RL110	J	19	-1.44397	0.29275
TC005RL110	K	19	-0.281442	0.185972
TC005RL110	L	19	-1.36629	-0.231649
TC005RL110	M	19	-2.70361	-0.0133473
TC005RL110	N	19	-2.77298	-0.293343
TC005RL110	O	19	-0.00676293	0.802913
TC005RL110	P	19	-0.581092	0.32597
TC005RL110	A	20	-1.25253	0.0863124
TC005RL110	B	20	-1.63819	0.190718
TC005RL110	C	20	-0.919585	1.07105
TC005RL110	D	20	-2.21529	-0.35741
TC005RL110	E	20	-1.75195	0.893081
TC005RL110	F	20	-1.67981	-0.139108
TC005RL110	G	20	-0.816927	0.133769
TC005RL110	H	20	-3.17251	-0.338427
TC005RL110	I	20	-0.289766	0.0791938
TC005RL110	J	20	-1.44952	0.138515
TC005RL110	K	20	-0.325835	0.762574
TC005RL110	L	20	-1.32744	0.487324
TC005RL110	M	20	-3.35563	-0.0323301
TC005RL110	N	20	-1.46339	-0.317072
TC005RL110	O	20	-1.05276	0.601221
TC005RL110	P	20	-0.925134	-0.16521
TC005RL110	A	21	-1.8768	-0.238768
TC005RL110	B	21	-2.63147	-0.0347029
TC005RL110	C	21	-1.34409	-0.74893
TC005RL110	D	21	-1.91287	0.439867
TC005RL110	E	21	-1.68258	0.0317368
TC005RL110	F	21	-2.6509	0.3758
TC005RL110	G	21	-1.81021	-0.196057
TC005RL110	H	21	-2.25969	0.620203
TC005RL110	I	21	-2.3013	-1.12147
TC005RL110	J	21	-1.49669	-1.23299
TC005RL110	K	21	0.231847	0.00326267
TC005RL110	L	21	0.717391	0.594102
TC005RL110	M	21	-2.00998	-0.442833
TC005RL110	N	21	-2.48442	-0.696728
TC005RL110	O	21	-0.678201	-0.74893
TC005RL110	P	21	0.967099	2.11273
TC005RL110	A	22	-1.02779	0.0910581
TC005RL110	B	22	-1.62709	0.25953
TC005RL110	C	22	-2.00165	-0.00148303
TC005RL110	D	22	-1.40236	0.836132
TC005RL110	E	22	-2.50939	-0.177074
TC005RL110	F	22	-1.28582	0.418511
TC005RL110	G	22	-1.5605	0.506307
TC005RL110	H	22	-0.886291	0.762574
TC005RL110	I	22	-1.84351	-0.224531
TC005RL110	J	22	-2.182	-0.5069
TC005RL110	K	22	-1.34409	0.0364826
TC005RL110	L	22	-2.19865	0.776811
TC005RL110	M	22	-1.97391	-0.934013
TC005RL110	N	22	-1.21924	-0.544865
TC005RL110	O	22	-1.86015	-0.0323301
TC005RL110	P	22	-0.855771	0.61783
TC006RL110	A	3	0.562083	0.240697
TC006RL110	B	3	0.529859	0.132251
TC006RL110	C	3	-0.0824076	-0.655964
TC006RL110	D	3	-1.12702	0.113736
TC006RL110	E	3	-0.930987	-1.71926
TC006RL110	F	3	0.00889532	0.325337
TC006RL110	G	3	-0.4879	-0.523713
TC006RL110	H	3	0.371422	0.468168
TC006RL110	I	3	-1.13239	-0.317402
TC006RL110	J	3	-0.254272	0.396753
TC006RL110	K	3	0.422444	0.187796
TC006RL110	L	3	0.0921421	0.351787
TC006RL110	M	3	-0.888021	-1.21671
TC006RL110	N	3	-1.43584	0.907241
TC006RL110	O	3	-0.329462	-0.0423203
TC006RL110	P	3	0.580881	0.7697
TC006RL110	A	4	0.371422	0.798795
TC006RL110	B	4	0.567454	-0.399398
TC006RL110	C	4	0.371422	-1.00246
TC006RL110	D	4	-1.27472	0.177216
TC006RL110	E	4	-1.05183	-0.571324
TC006RL110	F	4	0.631903	0.7168
TC006RL110	G	4	-0.863853	0.169281
TC006RL110	H	4	0.693667	0.417913
TC006RL110	I	4	-1.17536	-0.968076
TC006RL110	J	4	-1.7554	0.624224
TC006RL110	K	4	-0.109261	0.298887
TC006RL110	L	4	-0.87728	0.190441
TC006RL110	M	4	-0.4879	0.211601
TC006RL110	N	4	-0.748382	-0.330627
TC006RL110	O	4	0.161962	1.0342
TC006RL110	P	4	0.747375	0.962786
TC006RL110	A	5	0.468095	-0.698285
TC006RL110	B	5	-0.63291	-0.174571
TC006RL110	C	5	0.00620994	-0.354432
TC006RL110	D	5	-1.00081	-0.370302
TC006RL110	E	5	0.744689	2.61857
TC006RL110	F	5	0.333826	0.0264502
TC006RL110	G	5	-0.426136	-0.600419
TC006RL110	H	5	-0.423451	-0.193086
TC006RL110	I	5	-0.694674	-0.674479
TC006RL110	J	5	-0.316036	0.169281
TC006RL110	K	5	0.390219	0.0978656
TC006RL110	L	5	25.3374	20.2132
TC006RL110	M	5	-2.39721	-1.17439
TC006RL110	N	5	-1.07331	0.190441
TC006RL110	O	5	-0.050183	-0.208956
TC006RL110	P	5	0.218355	0.74854
TC006RL110	A	6	1.11527	-0.349142
TC006RL110	B	6	0.841363	-0.105801
TC006RL110	C	6	0.215669	-0.782925
TC006RL110	D	6	0.672184	-0.425848
TC006RL110	E	6	-0.619483	-0.71151
TC006RL110	F	6	0.970261	0.457588
TC006RL110	G	6	-0.213991	-0.0661254
TC006RL110	H	6	35.5123	30.2299
TC006RL110	I	6	-0.995436	-0.457588
TC006RL110	J	6	0.417073	-0.605709
TC006RL110	K	6	-0.305294	0.407333
TC006RL110	L	6	1.40798	-0.195731
TC006RL110	M	6	-2.06959	-0.819955
TC006RL110	N	6	0.0652883	0.272437
TC006RL110	O	6	0.22104	-0.0952206
TC006RL110	P	6	0.494949	1.42037
TC006RL110	A	7	-0.759123	-0.661254
TC006RL110	B	7	0.709779	-0.735315
TC006RL110	C	7	-0.794033	-0.7168
TC006RL110	D	7	-0.619483	-0.542229
TC006RL110	E	7	-0.165654	-0.0925756
TC006RL110	F	7	0.277433	0.663899
TC006RL110	G	7	0.379478	-0.298887
TC006RL110	H	7	1.28445	0.0158701
TC006RL110	I	7	-0.114632	-1.06594
TC006RL110	J	7	-0.753752	0.825245
TC006RL110	K	7	-0.176396	0.314757
TC006RL110	L	7	2.19211	2.04989
TC006RL110	M	7	-1.45464	-1.50766
TC006RL110	N	7	-1.52983	-0.595129
TC006RL110	O	7	-0.415395	0.124316
TC006RL110	P	7	-0.528181	0.642739
TC006RL110	A	8	0.696352	-0.105801
TC006RL110	B	8	-1.31768	-0.433783
TC006RL110	C	8	0.425129	0.465523
TC006RL110	D	8	-0.324092	0.579259
TC006RL110	E	8	-1.20758	-0.203666
TC006RL110	F	8	0.102884	-0.288307
TC006RL110	G	8	-0.971268	0.417913
TC006RL110	H	8	0.0787152	0.825245
TC006RL110	I	8	0.75006	-0.386172
TC006RL110	J	8	-1.08405	-1.66372
TC006RL110	K	8	-0.13343	0.444363
TC006RL110	L	8	-0.726899	0.243342
TC006RL110	M	8	-1.85207	-2.09485
TC006RL110	N	8	-1.31768	-0.0317402
TC006RL110	O	8	-0.200564	0.182506
TC006RL110	P	8	-0.836999	-0.658609
TC006RL110	A	9	-0.200564	0.579259
TC006RL110	B	9	0.108254	0.491973
TC006RL110	C	9	-0.493271	0.111091
TC006RL110	D	9	0.578196	-0.317402
TC006RL110	E	9	-0.589944	-0.171926
TC006RL110	F	9	-5.59818	-1.68488
TC006RL110	G	9	-0.415395	-0.100511
TC006RL110	H	9	-0.0636099	-0.367657
TC006RL110	I	9	-0.420765	0.69564
TC006RL110	J	9	0.315028	0.417913
TC006RL110	K	9	0.0223222	0.388817
TC006RL110	L	9	-0.686618	1.43624
TC006RL110	M	9	-2.71408	-1.28548
TC006RL110	N	9	-0.162969	-0.407333
TC006RL110	O	9	0.280119	-0.169281
TC006RL110	P	9	-0.77255	-0.375592
TC006RL110	A	10	0.0894567	-1.23522
TC006RL110	B	10	-0.291867	0.526358
TC006RL110	C	10	-0.114632	-0.70093
TC006RL110	D	10	-1.06794	0.875501
TC006RL110	E	10	-0.447619	-0.658609
TC006RL110	F	10	0.328455	0.0846405
TC006RL110	G	10	-0.598	-1.06859
TC006RL110	H	10	0.0357491	1.77216
TC006RL110	I	10	-0.176396	0.378238
TC006RL110	J	10	0.285489	0.80144
TC006RL110	K	10	-0.289182	0.470813
TC006RL110	L	10	-0.20325	0.938981
TC006RL110	M	10	60.8757	14.0847
TC006RL110	N	10	-1.16999	0.314757
TC006RL110	O	10	-1.01692	-0.357077
TC006RL110	P	10	-0.444934	-0.0158701
TC006RL110	A	11	-0.799404	0.0317402
TC006RL110	B	11	-0.847741	0.402043
TC006RL110	C	11	1.26565	0.870211
TC006RL110	D	11	-1.41436	0.70093
TC006RL110	E	11	0.178074	1.14265
TC006RL110	F	11	1.6792	1.34896
TC006RL110	G	11	-0.45299	0.613644
TC006RL110	H	11	0.9998	-0.293597
TC006RL110	I	11	-0.0609245	0.0767055
TC006RL110	J	11	-0.498641	-0.343852
TC006RL110	K	11	0.580881	0.539583
TC006RL110	L	11	0.363365	0.190441
TC006RL110	M	11	-2.04273	-0.983946
TC006RL110	N	11	-0.965897	-1.10562
TC006RL110	O	11	-0.388541	-0.312112
TC006RL110	P	11	-0.17371	0.417913
TC006RL110	A	12	-0.831628	0.0634804
TC006RL110	B	12	-0.184452	0.203666
TC006RL110	C	12	0.127052	0.515778
TC006RL110	D	12	-0.724213	0.581904
TC006RL110	E	12	-0.299923	0.362367
TC006RL110	F	12	-1.08137	-0.111091
TC006RL110	G	12	-0.254272	-0.973366
TC006RL110	H	12	3.92149	0.404688
TC006RL110	I	12	-0.826258	0.626869
TC006RL110	J	12	-0.444934	-0.423203
TC006RL110	K	12	-0.396597	-0.0687704
TC006RL110	L	12	-0.321406	0.592484
TC006RL110	M	12	-1.46269	-1.41244
TC006RL110	N	12	-1.25592	-0.0105801
TC006RL110	O	12	-0.0582392	-0.140186
TC006RL110	P	12	1.13675	0.161346
TC006RL110	A	13	-0.050183	1.17174
TC006RL110	B	13	-1.00618	0.346497
TC006RL110	C	13	0.207613	1.0633
TC006RL110	D	13	-1.21564	0.555454
TC006RL110	E	13	-1.63993	-0.137541
TC006RL110	F	13	-0.834314	0.372947
TC006RL110	G	13	-0.514754	-0.0661254
TC006RL110	H	13	0.0572322	-0.534293
TC006RL110	I	13	-0.710786	0.0290952
TC006RL110	J	13	-0.117318	1.31722
TC006RL110	K	13	-1.18878	-0.920466
TC006RL110	L	13	1.95579	0.793505
TC006RL110	M	13	-1.91384	-0.923111
TC006RL110	N	13	-1.01692	-1.0342
TC006RL110	O	13	0.556713	0.536938
TC006RL110	P	13	1.20389	0.190441
TC006RL110	A	14	-0.530866	0.600419
TC006RL110	B	14	-0.968583	0.285662
TC006RL110	C	14	-1.19684	-0.293597
TC006RL110	D	14	-0.1388	0.81202
TC006RL110	E	14	-0.517439	0.251277
TC006RL110	F	14	-0.0743514	-0.486683
TC006RL110	G	14	-0.783292	-0.843761
TC006RL110	H	14	-0.66782	0.267147
TC006RL110	I	14	0.0652883	1.28812
TC006RL110	J	14	-1.15656	-1.45476
TC006RL110	K	14	-0.888021	0.298887
TC006RL110	L	14	-1.68289	0.222181
TC006RL110	M	14	-2.10718	-0.960141
TC006RL110	N	14	-0.826258	0.531648
TC006RL110	O	14	-0.0421269	-0.8226
TC006RL110	P	14	1.37038	-0.134896
TC006RL110	A	15	-0.0770368	1.21406
TC006RL110	B	15	-0.0662953	0.73796
TC006RL110	C	15	-0.581888	-0.0872856
TC006RL110	D	15	-0.855797	1.20348
TC006RL110	E	15	1.43215	1.51295
TC006RL110	F	15	-0.393912	-0.0661254
TC006RL110	G	15	-0.796718	0.444363
TC006RL110	H	15	-0.289182	0.481393
TC006RL110	I	15	-0.98201	0.75912
TC006RL110	J	15	-1.59159	0.148121
TC006RL110	K	15	-0.458361	-0.166636
TC006RL110	L	15	-0.77255	-0.0793505
TC006RL110	M	15	-2.177	-0.888726
TC006RL110	N	15	-0.447619	0.383528
TC006RL110	O	15	-0.890707	-0.573969
TC006RL110	P	15	0.0223222	0.280372
TC006RL110	A	16	-0.224733	0.169281
TC006RL110	B	16	0.143164	0.825245
TC006RL110	C	16	-0.447619	0.148121
TC006RL110	D	16	-1.82522	-0.616289
TC006RL110	E	16	-1.6265	-0.542229
TC006RL110	F	16	-1.0948	0.648029
TC006RL110	G	16	0.0357491	-0.510488
TC006RL110	H	16	-0.0662953	-0.301532
TC006RL110	I	16	-1.3687	1.34631
TC006RL110	J	16	-0.085093	0.174571
TC006RL110	K	16	-0.0233292	0.830535
TC006RL110	L	16	-0.850426	0.0846405
TC006RL110	M	16	-2.63889	-0.608354
TC006RL110	N	16	-1.23443	-0.618934
TC006RL110	O	16	0.599679	0.293597
TC006RL110	P	16	0.637274	0.359722
TC006RL110	A	17	0.237153	0.166636
TC006RL110	B	17	-0.085093	0.981301
TC006RL110	C	17	-0.775235	-0.227471
TC006RL110	D	17	2.55195	0.214246
TC006RL110	E	17	-0.917561	-0.71151
TC006RL110	F	17	-0.162969	0.72209
TC006RL110	G	17	-0.828943	0.0423203
TC006RL110	H	17	-0.691989	0.441718
TC006RL110	I	17	-0.861168	-0.407333
TC006RL110	J	17	0.309658	-0.251277
TC006RL110	K	17	5.46021	1.1929
TC006RL110	L	17	-0.957841	-0.499908
TC006RL110	M	17	-1.54057	-1.39921
TC006RL110	N	17	-0.146857	-0.981301
TC006RL110	O	17	-0.20325	-0.113736
TC006RL110	P	17	0.336512	-0.0978656
TC006RL110	A	18	-0.00453158	0.539583
TC006RL110	B	18	-0.267699	1.25903
TC006RL110	C	18	0.00352456	0.77499
TC006RL110	D	18	-1.83865	-0.298887
TC006RL110	E	18	0.0464906	0.391462
TC006RL110	F	18	-0.909504	0.983946
TC006RL110	G	18	-0.659764	1.21935
TC006RL110	H	18	-0.211306	-0.81202
TC006RL110	I	18	-0.332148	0.444363
TC006RL110	J	18	0.422444	-1.0633
TC006RL110	K	18	-0.380485	0.0396753
TC006RL110	L	18	-0.396597	-0.70093
TC006RL110	M	18	-1.18341	-1.06859
TC006RL110	N	18	-0.259643	-0.354432
TC006RL110	O	18	-0.0394415	-0.973366
TC006RL110	P	18	1.74634	1.03949
TC006RL110	A	19	-0.324092	1.0104
TC006RL110	B	19	-0.410024	1.4865
TC006RL110	C	19	-0.326777	0.428493
TC006RL110	D	19	-0.326777	-0.354432
TC006RL110	E	19	-0.759123	0.00529003
TC006RL110	F	19	-0.992751	0.621579
TC006RL110	G	19	0.0357491	0.404688
TC006RL110	H	19	0.127052	-0.632159
TC006RL110	I	19	-0.909504	-0.203666
TC006RL110	J	19	-1.7178	0.251277
TC006RL110	K	19	0.983688	-0.00529003
TC006RL110	L	19	-0.858482	-0.603064
TC006RL110	M	19	-2.36767	-1.04478
TC006RL110	N	19	-1.315	0.0238052
TC006RL110	O	19	-0.0689807	-0.542229
TC006RL110	P	19	-0.259643	0.814665
TC006RL110	A	20	0.124367	0.671834
TC006RL110	B	20	0.148535	0.949561
TC006RL110	C	20	-0.192508	0.80673
TC006RL110	D	20	-0.0555538	0.904596
TC006RL110	E	20	-0.321406	0.351787
TC006RL110	F	20	-1.1485	-0.584549
TC006RL110	G	20	-0.192508	0.330627
TC006RL110	H	20	-0.224733	-0.219536
TC006RL110	I	20	-0.619483	0.208956
TC006RL110	J	20	0.0814006	0.0238052
TC006RL110	K	20	1.27908	-0.521068
TC006RL110	L	20	0.212984	-0.275082
TC006RL110	M	20	-1.79568	-0.219536
TC006RL110	N	20	-1.46269	0.161346
TC006RL110	O	20	0.0572322	-0.179861
TC006RL110	P	20	0.596993	0.195731
TC006RL110	A	21	-0.753752	0.372947
TC006RL110	B	21	-0.587259	0.0185151
TC006RL110	C	21	-0.361687	1.00511
TC006RL110	D	21	-0.622169	-0.174571
TC006RL110	E	21	-1.79568	0.0370302
TC006RL110	F	21	-1.07331	-0.290952
TC006RL110	G	21	0.92998	-0.100511
TC006RL110	H	21	-0.59263	0.238051
TC006RL110	I	21	-1.46806	-0.370302
TC006RL110	J	21	-0.764494	0.240697
TC006RL110	K	21	-0.732269	-0.640094
TC006RL110	L	21	-0.930987	-0.0740605
TC006RL110	M	21	1.21195	0.293597
TC006RL110	N	21	-1.31231	-1.10033
TC006RL110	O	21	0.717835	-0.507843
TC006RL110	P	21	0.50032	-0.341207
TC006RL110	A	22	-1.12971	0.100511
TC006RL110	B	22	-1.43584	0.412623
TC006RL110	C	22	-0.0018462	-0.72738
TC006RL110	D	22	0.0867713	-0.523713
TC006RL110	E	22	0.376792	-0.870211
TC006RL110	F	22	-1.57279	0.142831
TC006RL110	G	22	-0.748382	-0.420558
TC006RL110	H	22	-0.622169	-0.402043
TC006RL110	I	22	-0.533551	-0.8226
TC006RL110	J	22	-1.77151	-2.19272
TC006RL110	K	22	-0.56309	0.0449653
TC006RL110	L	22	-1.01423	-0.269792
TC006RL110	M	22	-1.20221	-0.923111
TC006RL110	N	22	-1.26666	-0.396753
TC006RL110	O	22	-1.11091	-1.06065
TC006RL110	P	22	1.3113	-0.148121
TC007RL110	A	3	1.42908	0.0270509
TC007RL110	B	3	-0.491584	-0.992587
TC007RL110	C	3	-1.04226	-0.334071
TC007RL110	D	3	-0.206841	-0.150855
TC007RL110	E	3	-0.0617837	-0.944791
TC007RL110	F	3	0.263252	0.528904
TC007RL110	G	3	-0.0617837	-0.0871272
TC007RL110	H	3	1.31358	-0.602257
TC007RL110	I	3	-1.13897	-0.904962
TC007RL110	J	3	0.118195	0.273994
TC007RL110	K	3	-0.894521	-0.0685401
TC007RL110	L	3	0.572171	-0.416385
TC007RL110	M	3	0.118195	-0.339381
TC007RL110	N	3	-0.851541	-0.142889
TC007RL110	O	3	-0.985854	0.183714
TC007RL110	P	3	1.7783	1.02014
TC007RL110	A	4	0.633955	-0.429662
TC007RL110	B	4	-0.0456662	-0.36859
TC007RL110	C	4	-1.21956	-0.774852
TC007RL110	D	4	0.17192	0.871438
TC007RL110	E	4	-0.419055	-1.01914
TC007RL110	F	4	0.456662	0.133263
TC007RL110	G	4	0.926756	-0.41373
TC007RL110	H	4	0.341154	-0.0818166
TC007RL110	I	4	0.335781	1.29363
TC007RL110	J	4	-0.327722	-0.58898
TC007RL110	K	4	-0.166547	1.11307
TC007RL110	L	4	-0.631269	-0.0472976
TC007RL110	M	4	-0.821992	-0.129612
TC007RL110	N	4	-2.1302	-0.71909
TC007RL110	O	4	0.741405	-0.0924379
TC007RL110	P	4	-0.2149	0.196991
TC007RL110	A	5	0.805875	-0.607567
TC007RL110	B	5	0.333095	0.0748464
TC007RL110	C	5	-1.06644	-1.10676
TC007RL110	D	5	-0.0402937	0.0668805
TC007RL110	E	5	0.177292	0.337722
TC007RL110	F	5	3.14291	1.79814
TC007RL110	G	5	-0.910639	-0.0605742
TC007RL110	H	5	0.00805875	-0.355313
TC007RL110	I	5	-0.556054	0.0403275
TC007RL110	J	5	-0.77364	-0.0818166
TC007RL110	K	5	0.02149	-0.201305
TC007RL110	L	5	-0.010745	0.297892
TC007RL110	M	5	-2.25645	-1.37495
TC007RL110	N	5	-0.120881	-1.12535
TC007RL110	O	5	-0.0349212	-1.59534
TC007RL110	P	5	-0.338467	0.0350169
TC007RL110	A	6	2.1302	-0.421696
TC007RL110	B	6	0.639327	0.284616
TC007RL110	C	6	2.25914	1.51933
TC007RL110	D	6	1.13628	-0.326105
TC007RL110	E	6	-0.693052	-0.660673
TC007RL110	F	6	0.290115	-0.015434
TC007RL110	G	6	0.0268625	-0.785473
TC007RL110	H	6	-0.682307	0.316479
TC007RL110	I	6	-1.5231	-0.482768
TC007RL110	J	6	-0.308919	0.189025
TC007RL110	K	6	-0.467407	0.0482934
TC007RL110	L	6	-0.445917	-0.19865
TC007RL110	M	6	-1.2706	-0.944791
TC007RL110	N	6	-2.43912	-1.51568
TC007RL110	O	6	0.797816	-0.570393
TC007RL110	P	6	-0.136999	0.372241
TC007RL110	A	7	0.934815	-1.03507
TC007RL110	B	7	-0.521132	0.539525
TC007RL110	C	7	-1.24373	-1.06163
TC007RL110	D	7	0.351899	0.372241
TC007RL110	E	7	-0.566799	0.130608
TC007RL110	F	7	-0.550681	0.0137744
TC007RL110	G	7	1.22762	0.722741
TC007RL110	H	7	-0.17192	0.0801571
TC007RL110	I	7	-0.813934	-0.54384
TC007RL110	J	7	-0.733346	0.268684
TC007RL110	K	7	0.188037	-0.0924379
TC007RL110	L	7	0.126254	-0.97931
TC007RL110	M	7	-1.11479	-1.00321
TC007RL110	N	7	-0.435172	-0.857166
[truncated: 7,602 more rows]
