# Supplementary material for: Identification of a Selective RelA Inhibitor Based on DSE-FRET Screening Methods
Source: Int J Mol Sci. 2020 Nov 30;21(23):9150. doi: 10.3390/ijms21239150 (PMC7734590; doi:10.3390/ijms21239150)
Supplement: Supplementary file 1 [file ijms-21-09150-s001.zip › Table S1B. NF-kB_HTS_NPDepo.xlsx]

## Sheet: QC Date_RelA_NPDepo
Plate ID	S/B	MLC	SDLC	CVLC	MHC	SDHC	CVHC	Z'
NP001RL105	3.37151	12048.5	553.421	4.59328	40973.8	536.407	1.30915	0.886968
NP002RL105	3.30644	12536.4	434.389	3.46502	41601.5	425.081	1.02179	0.911289
NP003RL105	3.33526	12185.7	318.314	2.6122	40930.9	583.814	1.42634	0.905849
NP004RL105	3.19653	12830.9	405.907	3.16351	40972	864.161	2.10915	0.864604
NP005RL105	3.16248	12947.7	495.981	3.83065	40855.2	1001.39	2.45108	0.839035
NP006RL105	3.26277	12662.2	458.389	3.62013	40984.3	681.043	1.66172	0.879306
NP007RL105	2.757	15499.2	789.579	5.09432	42139.3	744.862	1.76762	0.827203
NP008RL105	2.38693	17984.8	968.367	5.38438	42559.2	516.41	1.21339	0.818741
NP009RL105	2.64285	15771.7	367.04	2.32721	41796.4	606.854	1.45193	0.887734
NP010RL105	2.49971	17019.8	631.128	3.7082	42391.5	663.315	1.56474	0.846942
NP011RL105	2.98668	14181.6	791.251	5.57941	41800.4	569.982	1.36358	0.85214
NP012RL105	3.28849	12871.2	450.001	3.49619	41690	688.545	1.65158	0.881479
NP013RL105	3.44756	12022.5	470.388	3.91256	41631.5	618.858	1.48651	0.889637
NP014RL105	3.6004	11459	410.239	3.58006	41422.2	727.194	1.75557	0.886117
NP015RL105	3.53354	12086.8	1255.18	10.3847	41069.7	792.187	1.92888	0.788078
NP016RL105	3.70678	10887.7	607.101	5.57603	40052	824.509	2.0586	0.852737
NP017RL105	2.73329	14818.1	503.879	3.40043	40455.8	893.607	2.20885	0.836473
NP018RL105	2.92008	13854.1	454.091	3.27767	40119.5	686.456	1.71103	0.869728
NP019RL105	3.07836	13045.6	369.438	2.83191	39780.8	835.919	2.10131	0.864745
NP020RL105	3.22009	12440.2	419.36	3.37101	39578.8	782.186	1.97628	0.867177
NP021RL105	3.22829	12759.9	440.156	3.44952	40854.6	858.099	2.10037	0.86137
NP022RL105	3.36865	12072.4	284.87	2.35967	40539.9	846.368	2.08774	0.880786
NP023RL105	3.44277	11933.4	387.703	3.2489	40763.2	955.466	2.34394	0.860231
NP024RL105	3.49203	11751.3	368.916	3.13936	40606.1	805.213	1.98299	0.877927
NP025RL105	3.13872	13144.8	425.426	3.23647	40965.4	759.475	1.85394	0.872228
NP026RL105	3.23713	12633.3	358.775	2.83991	40384.8	806.091	1.99603	0.874075
NP027RL105	3.24035	12558.1	282.496	2.24952	40512.2	800.564	1.9761	0.883768
NP028RL105	3.25451	12369.7	271.689	2.19641	40342.4	952.482	2.361	0.868711
NP029RL105	3.0994	12965.6	316.622	2.44202	39981.1	871.248	2.17915	0.86809
NP030RL105	3.26942	12805.4	1362.17	10.6375	40267.8	774.697	1.92386	0.766568
NP031RL105	3.64213	11496.1	469.61	4.08494	42097.3	1085.5	2.57855	0.847544
NP032RL105	3.53802	11919.7	483.056	4.05259	42106.1	824.059	1.9571	0.870096
NP033RL105	3.63418	11596.8	318.779	2.74885	42320.3	720.736	1.70305	0.898496
NP034RL105	3.94305	10655.7	288.047	2.70322	42029.7	765.501	1.82134	0.899259
NP035RL105	3.6743	11521.6	489.431	4.24794	42540.1	880.154	2.069	0.867538
NP036RL105	3.73742	11454.6	532.07	4.64505	42394.4	917.553	2.16432	0.859441
NP037RL105	2.59581	16822.6	574.026	3.41223	43015.3	876.445	2.03752	0.833869
NP038RL105	2.58776	16864	571.046	3.38618	43252.1	854.486	1.97559	0.837935
NP039RL105	2.52887	17119.4	619.656	3.61962	43348.3	632.331	1.45872	0.856801
NP040RL105	2.96349	14447.6	495.468	3.42943	42846.1	1055.11	2.46257	0.836198
NP041RL105	2.43676	17862.1	1102.17	6.17044	43605.9	887.398	2.03504	0.76815
NP042RL105	3.01745	14650	686.149	4.68361	43563.7	889.89	2.04273	0.836475
NP043RL105	3.36048	12936.1	686.238	5.30482	42817.6	846.135	1.97614	0.846155
NP044RL105	3.52853	12179.6	383.491	3.14864	42709.8	838.175	1.96249	0.879955
NP045RL105	3.70716	11606.8	288.691	2.48727	42666.9	946.468	2.21827	0.8807
NP046RL105	3.66629	11628.8	276.747	2.37984	42679.1	942.432	2.20818	0.882206
NP047RL105	2.38649	17305.1	1161.95	6.7145	41033.9	603.088	1.46973	0.776848
NP048RL105	2.57918	16270.6	1222.93	7.51618	41217	487.455	1.18266	0.794313
NP049RL105	2.84783	14534.6	478.371	3.29127	40938.7	1028.8	2.51302	0.828758
NP050RL105	3.04793	13339.9	498.625	3.73783	40446.6	832.658	2.05866	0.852661
NP051RL105	3.10661	13363.4	518.33	3.87872	41143.1	845.682	2.05547	0.852696
NP052RL105	2.93062	14328	532.008	3.71306	41630	636.958	1.53005	0.871552
NP053RL105	2.96156	13786.6	496.604	3.60207	40840.3	1063.16	2.60322	0.827036
NP054RL105	2.77995	14920.7	590.114	3.95501	41223.1	567.387	1.37638	0.867978
NP055RL105	3.42321	12133.3	313.043	2.58003	41172.9	1126.65	2.7364	0.851269
NP056RL105	3.19822	12857.8	413.729	3.21774	41040.3	627.929	1.53003	0.889117
NP057RL105	3.11498	13001.1	338.431	2.60309	40329.5	683.992	1.69601	0.887763
NP058RL105	3.04394	13347.6	389.066	2.91488	40425.1	793.628	1.96321	0.868966
NP059RL105	1.97379	21368.8	664.852	3.11132	41962.9	865.664	2.06292	0.777046
NP060RL105	1.98629	20994.1	758.289	3.61191	42109.3	688.772	1.63568	0.794404
NP061RL105	2.46944	16758.1	961.527	5.73768	41275.3	623.351	1.51023	0.806069
NP062RL105	2.03874	20392.1	819.762	4.01999	41449.3	656.795	1.58457	0.789636

## Sheet: QC Date_p52_NPDepo
Plate ID	S/B	MLC	SDLC	CVLC	MHC	SDHC	CVHC	Z'
NP00152105	4.23524	9545.25	328.013	3.4364	40666.3	602.631	1.48189	0.910288
NP00252105	4.28661	9494.75	229.539	2.41753	40619.4	929.92	2.28935	0.888244
NP00352105	4.35208	9369.06	202.641	2.16288	40567.8	877.451	2.16292	0.896141
NP00452105	4.3739	9300.5	198.298	2.13212	40452.1	713.609	1.76408	0.91218
NP00552105	4.40271	9160.19	265.591	2.8994	40478.2	776.99	1.91953	0.90013
NP00652105	4.21493	9717.81	258.835	2.66351	40807.8	768.715	1.88375	0.900848
NP00752105	4.37221	9371.12	279.592	2.98355	40759.1	822.127	2.01704	0.8947
NP00852105	4.44383	9152.19	353.195	3.85913	40621.7	730.98	1.79948	0.896645
NP00952105	4.43617	9118.19	238.324	2.61372	40543.3	1029.86	2.54014	0.878933
NP01052105	4.51288	9032.19	236.758	2.62127	40441.4	748.743	1.85143	0.905872
NP01152105	4.07453	10290.8	287.551	2.79425	41702.7	916.657	2.19808	0.884992
NP01252105	3.70689	11255.9	355.636	3.15954	41801.3	895.888	2.14321	0.877082
NP01352105	4.21712	9797.25	259.418	2.64786	41294.9	828.41	2.00608	0.89639
NP01452105	4.28583	9601.88	170.663	1.77739	40749.9	835.352	2.04995	0.903106
NP01552105	4.22912	9584.25	400.666	4.18046	40271.1	1005.91	2.49785	0.86249
NP01652105	4.09567	10005	318.113	3.17954	40954.9	719.114	1.75587	0.899461
NP01752105	3.66281	11271.2	387.647	3.43928	41501.3	818.615	1.9725	0.880292
NP01852105	4.32461	9482.25	225.127	2.37419	40873.8	766.716	1.87581	0.905212
NP01952105	4.37124	9457.06	971.85	10.2764	40641.9	836.863	2.05912	0.826001
NP02052105	4.46687	9055.06	259.469	2.86545	40559.9	914.929	2.25575	0.88817
NP02152105	4.65067	8749.56	243.121	2.77867	40999.4	914.935	2.23158	0.892273
NP02252105	4.71568	8630.69	131.947	1.52881	40609.4	710.461	1.7495	0.920972
NP02352105	4.70313	8633	229.404	2.65729	40662.1	1079.18	2.65402	0.877432
NP02452105	4.66981	8628.81	264.139	3.06113	40470.7	916.929	2.26566	0.888725
NP02552105	4.74731	8596.62	201.246	2.34099	40629.1	863.301	2.12484	0.9003
NP02652105	4.27283	9341.38	286.243	3.06425	39793.6	743.751	1.86902	0.89853
NP02752105	4.35731	9318.56	257.26	2.76073	40245.5	855.397	2.12545	0.892069
NP02852105	4.47753	8989.88	248.941	2.76913	40019.8	759.478	1.89776	0.902505
NP02952105	4.4277	9025.12	227.959	2.52583	39973.7	757.952	1.89613	0.904431
NP03052105	4.41352	9144	273.098	2.98664	40138.4	861.943	2.14743	0.890138
NP03152105	4.53213	9093.12	441.237	4.85242	41134.3	803.61	1.95362	0.883446
NP03252105	4.49855	9143	272.921	2.98503	40862.6	825.538	2.02028	0.896109
NP03352105	4.4994	9170.25	203.513	2.21928	41175.7	751.187	1.82435	0.910512
NP03452105	4.57566	8969.44	267.184	2.97882	40909.4	883.661	2.16004	0.891906
NP03552105	4.55716	9083.06	285.29	3.1409	41342.1	992.909	2.40169	0.881131
NP03652105	4.49041	9235.56	276.133	2.98989	41165.9	691.487	1.67975	0.909088
NP03752105	4.5527	9061	298.117	3.29011	40862.8	773.041	1.8918	0.898953
NP03852105	4.62334	8872.19	232.157	2.61668	41049	688.963	1.67839	0.914119
NP03952105	4.6055	8870.25	172.164	1.94092	40840.3	620.362	1.51899	0.925631
NP04052105	4.65083	8840.06	265.055	2.99833	41003.4	921.684	2.24782	0.889308
NP04152105	4.62524	8822.25	237.134	2.68791	40874.2	759.421	1.85795	0.906724
NP04252105	4.78955	8654.44	236.891	2.73722	41000.4	554.002	1.35121	0.926647
NP04352105	4.72438	8600.19	224.085	2.60558	40684.5	698.556	1.71701	0.91373
NP04452105	4.67743	8729.19	237.222	2.71758	40964.4	860.168	2.09979	0.89787
NP04552105	4.60443	8902.88	226.647	2.54578	40966.9	804.689	1.96424	0.903505
NP04652105	4.55187	8914.31	270.916	3.03911	40871.4	1009.46	2.46983	0.879804
NP04752105	4.53886	9011.25	371.154	4.11878	41171.8	830.005	2.01596	0.887953
NP04852105	4.66928	8869.94	176.348	1.98816	41384.4	857.453	2.07192	0.904615
NP04952105	4.76377	8725.81	239.85	2.74874	41369.1	885.894	2.14144	0.896541
NP05052105	4.66806	8867.31	561.309	6.33009	41010.4	661.488	1.61298	0.885873
NP05152105	4.64313	8883.12	185.54	2.08868	41288	865.868	2.09714	0.902662
NP05252105	4.71068	8900.25	206.262	2.31749	41517.2	784.62	1.88987	0.908862
NP05352105	4.72582	8805.19	300.191	3.40925	41269.9	846.28	2.0506	0.894057
NP05452105	4.72356	8788.19	263.606	2.99955	41751.1	979.222	2.34538	0.886888
NP05552105	4.77066	8755.06	296.392	3.38538	41413.5	813.753	1.96495	0.898022
NP05652105	4.70043	8876.19	387.696	4.36782	41486.9	864.966	2.08491	0.884762
NP05752105	4.67158	8925.94	268.532	3.00844	41417	913.957	2.20672	0.890817
NP05852105	4.69923	8761.69	229.782	2.62258	41270.3	872.913	2.11511	0.89824
NP05952105	4.74043	8702.62	228.488	2.62551	40913.4	918.195	2.24424	0.893202
NP06052105	4.719	8652.75	254.036	2.9359	40835.8	841.929	2.06174	0.897837
NP06152105	4.42429	9374.56	161.984	1.72791	41576.8	724.2	1.74184	0.917442
NP06252105	4.25655	9604.44	329.496	3.43067	40944.5	878.641	2.14593	0.884352

## Sheet: HTS_Results_NPDepo
Plate No.	Well No.	Plate/Well No.	Inhibition % @ 5 mg/ml			RelA												RelA	p52
			RelA	p52												-100~	-100	0	0
AA00009	A02	AA00009A02	2.36298	1.84361												-100~-95	-95	0	0
AA00010	A02	AA00010A02	2.72253	0.368721												-95~-85	-85	0	0
AA00009	A03	AA00009A03	2.51164	0.29803												-85~-80	-80	0	0
AA00010	A03	AA00010A03	1.61623	0.844283												-80~-75	-75	0	0
AA00009	A04	AA00009A04	3.65597	-0.28357												-75~-70	-70	0	0
AA00010	A04	AA00010A04	-	-												-70~-65	-65	0	0
AA00009	A05	AA00009A05	3.573	0.352655												-65~-60	-60	0	0
AA00010	A05	AA00010A05	1.63698	0.179139												-60~-55	-55	0	0
AA00009	A06	AA00009A06	2.44941	1.3809												-55~-50	-50	0	0
AA00010	A06	AA00010A06	2.58424	0.0345425												-50~-45	-45	0	0
AA00009	A07	AA00009A07	1.92047	-0.453873												-45~-40	-40	1	0
AA00010	A07	AA00010A07	1.99998	1.40339		Avg.	0.50972									-40~-35	-35	0	0
AA00009	A08	AA00009A08	0.945539	0.185566		S.D.	9.60102									-35~-30	-30	2	0
AA00010	A08	AA00010A08	0.620564	1.36162		3S.D.	28.8031									-30~-25	-25	5	0
AA00009	A09	AA00009A09	2.5635	-0.428167		Avg.± 3S.D.	0.5 ± 28.8									-25~-20	-20	8	0
AA00010	A09	AA00010A09	3.56954	1.27486												-20~-15	-15	23	0
AA00009	A10	AA00009A10	5.67497	0.898909		p52										-15~-10	-10	65	3
AA00010	A10	AA00010A10	4.73807	0.837857												-10~-5	-5	1187	20
AA00009	A11	AA00009A11	3.24802	-0.322129												-5~0	0	8844	8586
AA00010	A11	AA00010A11	1.93775	-0.0457889												0~5	5	8395	10818
AA00011	A02	AA00011A02	0.150388	-0.386394												5~0	10	936	148
AA00012	A02	AA00012A02	2.47016	1.50943												10~15	15	116	57
AA00011	A03	AA00011A03	4.22641	0.500465												15~20	20	45	27
AA00012	A03	AA00012A03	2.18667	1.00816												20~25	25	24	20
AA00011	A04	AA00011A04	-1.32929	-0.816971												25~30	30	19	13
AA00012	A04	AA00012A04	4.70695	3.29279												30~35	35	11	16
AA00011	A05	AA00011A05	1.03888	-0.16468												35~40	40	11	8
AA00012	A05	AA00012A05	2.80205	0.690047												40~45	45	10	12
AA00011	A06	AA00011A06	1.99998	-0.142187												45~50	50	7	9
AA00012	A06	AA00012A06	1.54709	0.452266		Avg.	0.752886									50~55	55	11	1
AA00011	A07	AA00011A07	2.80205	1.58655		S.D.	7.81275									55~60	60	5	6
AA00012	A07	AA00012A07	1.89972	0.0506088		3S.D.	23.4382									60~65	65	8	5
AA00011	A08	AA00011A08	-0.489191	-2.62282		Avg.± 3S.D.	0.8 ± 23.4									65~70	70	5	5
AA00012	A08	AA00012A08	1.47449	0.645062												70~75	75	5	2
AA00011	A09	AA00011A09	2.57042	0.0538221												75~80	80	3	9
AA00012	A09	AA00012A09	3.32062	0.85071												80~85	85	10	3
AA00011	A10	AA00011A10	3.27222	1.28771												85~90	90	8	3
AA00012	A10	AA00012A10	3.02676	1.63796												90~95	95	4	2
AA00011	A11	AA00011A11	2.77439	1.59297												95~100	100	2	1
AA00012	A11	AA00012A11	2.52893	1.05957												100~		34	30
AA00009	B02	AA00009B02	1.13914	-0.473152
AA00010	B02	AA00010B02	2.77093	-0.322129
AA00009	B03	AA00009B03	0.599821	-0.0779215
AA00010	B03	AA00010B03	1.27052	-0.540631
AA00009	B04	AA00009B04	0.796881	-0.701294
AA00010	B04	AA00010B04	2.13481	0.513318
AA00009	B05	AA00009B05	1.58512	0.400854
AA00010	B05	AA00010B05	1.12186	0.432986
AA00009	B06	AA00009B06	0.841824	0.323736
AA00010	B06	AA00010B06	0.496106	1.06279
AA00009	B07	AA00009B07	1.91355	-0.110054
AA00010	B07	AA00010B07	1.65426	-0.392821
AA00009	B08	AA00009B08	0.845281	0.272324
AA00010	B08	AA00010B08	2.32841	0.465119
AA00009	B09	AA00009B09	2.13135	-0.466726
AA00010	B09	AA00010B09	5.80634	1.06279
AA00009	B10	AA00009B10	7.21341	-0.299636
AA00010	B10	AA00010B10	2.53239	1.1624
AA00009	B11	AA00009B11	3.09591	0.0795281
AA00010	B11	AA00010B11	2.70179	0.137367
AA00011	B02	AA00011B02	3.46928	0.551877
AA00012	B02	AA00012B02	3.27914	0.249831
AA00011	B03	AA00011B03	2.94379	0.551877
AA00012	B03	AA00012B03	2.48744	-0.444233
AA00011	B04	AA00011B04	3.28951	0.539024
AA00012	B04	AA00012B04	-15.8218	-5.92284
AA00011	B05	AA00011B05	3.00948	0.0827414
AA00012	B05	AA00012B05	1.87552	0.114874
AA00011	B06	AA00011B06	2.11407	1.30699
AA00012	B06	AA00012B06	2.1763	0.609716
AA00011	B07	AA00011B07	2.4909	1.23951
AA00012	B07	AA00012B07	1.52289	0.918188
AA00011	B08	AA00011B08	1.50906	0.616142
AA00012	B08	AA00012B08	2.19013	0.343015
AA00011	B09	AA00011B09	2.54276	1.40982
AA00012	B09	AA00012B09	2.25236	-0.116481
AA00011	B10	AA00011B10	3.47966	1.39375
AA00012	B10	AA00012B10	1.54363	0.0506088
AA00011	B11	AA00011B11	7.90485	0.420133
AA00012	B11	AA00012B11	2.03801	0.474759
AA00009	C02	AA00009C02	0.364733	-1.41142
AA00010	C02	AA00010C02	-0.471905	-0.720573
AA00009	C03	AA00009C03	0.720823	-0.453873
AA00010	C03	AA00010C03	-0.143473	-0.354262
AA00009	C04	AA00009C04	0.181502	0.188779
AA00010	C04	AA00010C04	-0.506477	0.191992
AA00009	C05	AA00009C05	0.222988	-0.238584
AA00010	C05	AA00010C05	-0.371647	0.265897
AA00009	C06	AA00009C06	1.41572	-0.190386
AA00010	C06	AA00010C06	-0.0432148	1.4066
AA00009	C07	AA00009C07	1.00777	0.304456
AA00010	C07	AA00010C07	1.17371	-1.25719
AA00009	C08	AA00009C08	3.68017	1.65402
AA00010	C08	AA00010C08	-0.893682	0.571157
AA00009	C09	AA00009C09	1.07346	0.243404
AA00010	C09	AA00010C09	2.05875	0.728606
AA00009	C10	AA00009C10	1.51943	-0.177533
AA00010	C10	AA00010C10	76.5161	78.467
AA00009	C11	AA00009C11	0.914425	0.632208
AA00010	C11	AA00010C11	2.15555	0.959961
AA00011	C02	AA00011C02	2.76748	0.699687
AA00012	C02	AA00012C02	2.13135	1.17846
AA00011	C03	AA00011C03	-4.45458	2.618
AA00012	C03	AA00012C03	3.02331	2.02034
AA00011	C04	AA00011C04	1.87206	1.83397
AA00012	C04	AA00012C04	1.35349	0.98888
AA00011	C05	AA00011C05	2.83662	1.92073
AA00012	C05	AA00012C05	-0.88331	0.455479
AA00011	C06	AA00011C06	1.04926	1.73436
AA00012	C06	AA00012C06	2.42867	2.65656
AA00011	C07	AA00011C07	2.70179	0.985667
AA00012	C07	AA00012C07	1.554	2.68227
AA00011	C08	AA00011C08	-0.309418	0.368721
AA00012	C08	AA00012C08	1.91701	0.98888
AA00011	C09	AA00011C09	3.34137	0.776805
AA00012	C09	AA00012C09	11.5453	11.3163
AA00011	C10	AA00011C10	1.83058	1.27165
AA00012	C10	AA00012C10	0.800338	1.00173
AA00011	C11	AA00011C11	2.48744	1.41946
AA00012	C11	AA00012C11	2.12444	-0.498858
AA00009	D02	AA00009D02	-0.115816	-0.222518
AA00010	D02	AA00010D02	0.651679	0.0955944
AA00009	D03	AA00009D03	0.229903	-0.344622
AA00010	D03	AA00010D03	-0.00518577	-0.563123
AA00009	D04	AA00009D04	1.3362	0.230551
AA00010	D04	AA00010D04	2.13135	2.29025
AA00009	D05	AA00009D05	2.01727	0.040969
AA00010	D05	AA00010D05	10.8953	0.905335
AA00009	D06	AA00009D06	-0.364733	-0.0618552
AA00010	D06	AA00010D06	0.541049	-0.113267
AA00009	D07	AA00009D07	1.37077	1.01137
AA00010	D07	AA00010D07	1.63698	0.0827414
AA00009	D08	AA00009D08	-0.101987	0.281963
AA00010	D08	AA00010D08	0.966283	0.844283
AA00009	D09	AA00009D09	1.07691	1.84361
AA00010	D09	AA00010D09	1.82712	0.429773
AA00009	D10	AA00009D10	0.800338	1.06279
AA00010	D10	AA00010D10	2.5635	0.121301
AA00009	D11	AA00009D11	2.29038	2.03961
AA00010	D11	AA00010D11	3.7424	1.10456
AA00011	D02	AA00011D02	2.82279	0.69326
AA00012	D02	AA00012D02	1.91701	1.01137
AA00011	D03	AA00011D03	2.69487	0.792871
AA00012	D03	AA00012D03	1.20137	1.63153
AA00011	D04	AA00011D04	1.2878	1.066
AA00012	D04	AA00012D04	3.13048	2.10067
AA00011	D05	AA00011D05	0.948997	0.654701
AA00012	D05	AA00012D05	-17.4985	-6.22488
AA00011	D06	AA00011D06	2.81242	-0.161466
AA00012	D06	AA00012D06	2.30767	-0.142187
AA00011	D07	AA00011D07	1.04234	0.927828
AA00012	D07	AA00012D07	6.06563	3.86153
AA00011	D08	AA00011D08	2.99911	0.651488
AA00012	D08	AA00012D08	2.76402	1.32627
AA00011	D09	AA00011D09	0.693165	1.65081
AA00012	D09	AA00012D09	3.59028	2.65656
AA00011	D10	AA00011D10	2.03455	1.7697
AA00012	D10	AA00012D10	2.51164	1.10456
AA00011	D11	AA00011D11	4.58941	2.04926
AA00012	D11	AA00012D11	3.01985	1.18168
AA00009	E02	AA00009E02	0.350904	-0.804118
AA00010	E02	AA00010E02	1.32929	0.13094
AA00009	E03	AA00009E03	-0.285218	0.86999
AA00010	E03	AA00010E03	-7.53839	-3.45184
AA00009	E04	AA00009E04	0.983568	0.796085
AA00010	E04	AA00010E04	0.783052	-0.28357
AA00009	E05	AA00009E05	1.22903	0.326949
AA00010	E05	AA00010E05	0.464991	-0.476365
AA00009	E06	AA00009E06	-0.229903	-0.98406
AA00010	E06	AA00010E06	1.24286	0.214485
AA00009	E07	AA00009E07	1.57129	0.404067
AA00010	E07	AA00010E07	1.76835	-0.1454
AA00009	E08	AA00009E08	0.39239	-0.228945
AA00010	E08	AA00010E08	0.212617	0.346228
AA00009	E09	AA00009E09	1.3604	0.7029
AA00010	E09	AA00010E09	0.202245	0.911762
AA00009	E10	AA00009E10	2.78476	1.32627
AA00010	E10	AA00010E10	2.20741	-0.0490022
AA00009	E11	AA00009E11	0.890225	1.44838
AA00010	E11	AA00010E11	3.46237	0.240191
AA00011	E02	AA00011E02	1.77181	0.780018
AA00012	E02	AA00012E02	-4.68621	-2.9088
AA00011	E03	AA00011E03	1.433	1.28129
AA00012	E03	AA00012E03	3.68709	1.47408
AA00011	E04	AA00011E04	0.817624	0.683621
AA00012	E04	AA00012E04	2.1521	1.94
AA00011	E05	AA00011E05	-0.309418	-0.16468
AA00012	E05	AA00012E05	2.02764	-0.113267
AA00011	E06	AA00011E06	1.58858	0.108448
AA00012	E06	AA00012E06	8.59974	0.42656
AA00011	E07	AA00011E07	19.4933	16.9716
AA00012	E07	AA00012E07	1.2636	0.995307
AA00011	E08	AA00011E08	1.88244	1.15918
AA00012	E08	AA00012E08	0.90751	0.609716
AA00011	E09	AA00011E09	2.14173	-0.0393624
AA00012	E09	AA00012E09	2.3457	-0.193599
AA00011	E10	AA00011E10	3.08208	1.00495
AA00012	E10	AA00012E10	2.13135	1.39696
AA00011	E11	AA00011E11	2.30421	0.85071
AA00012	E11	AA00012E11	-17.1079	-9.0397
AA00009	F02	AA00009F02	-6.81238	-2.23402
AA00010	F02	AA00010F02	-0.610193	0.628995
AA00009	F03	AA00009F03	-0.219531	0.792871
AA00010	F03	AA00010F03	4.39235	0.14058
AA00009	F04	AA00009F04	-0.171131	1.04351
AA00010	F04	AA00010F04	2.82279	0.134154
AA00009	F05	AA00009F05	-0.58945	-0.399247
AA00010	F05	AA00010F05	1.29126	-0.633815
AA00009	F06	AA00009F06	0.288675	1.2845
AA00010	F06	AA00010F06	-0.285218	-0.084348
AA00009	F07	AA00009F07	-0.181502	1.87895
AA00010	F07	AA00010F07	1.1184	0.821791
AA00009	F08	AA00009F08	0.713908	0.818577
AA00010	F08	AA00010F08	1.38806	1.14633
AA00009	F09	AA00009F09	0.810709	1.61868
AA00010	F09	AA00010F09	3.00948	0.673981
AA00009	F10	AA00009F10	1.64389	1.48051
AA00010	F10	AA00010F10	2.0553	0.281963
AA00009	F11	AA00009F11	-19.3308	-9.01399
AA00010	F11	AA00010F11	2.0553	0.0506088
AA00011	F02	AA00011F02	1.86169	1.76327
AA00012	F02	AA00012F02	1.2878	0.86999
AA00011	F03	AA00011F03	2.66722	0.799298
AA00012	F03	AA00012F03	0.741566	0.471546
AA00011	F04	AA00011F04	1.98269	-0.0650685
AA00012	F04	AA00012F04	0.980111	-0.617749
AA00011	F05	AA00011F05	0.28176	2.00106
AA00012	F05	AA00012F05	17.661	14.7448
AA00011	F06	AA00011F06	1.42955	1.81469
AA00012	F06	AA00012F06	2.64993	0.825004
AA00011	F07	AA00011F07	2.04147	0.169499
AA00012	F07	AA00012F07	1.42609	0.349442
AA00011	F08	AA00011F08	2.75365	0.54545
AA00012	F08	AA00012F08	1.94812	1.24594
AA00011	F09	AA00011F09	2.19704	1.76649
AA00012	F09	AA00012F09	2.23507	0.857136
AA00011	F10	AA00011F10	2.20741	0.609716
AA00012	F10	AA00012F10	1.39152	1.52228
AA00011	F11	AA00011F11	3.90489	1.44195
AA00012	F11	AA00012F11	2.56004	2.2774
AA00009	G02	AA00009G02	-0.561792	-0.138973
AA00010	G02	AA00010G02	-0.869482	-0.289996
AA00009	G03	AA00009G03	-0.921339	-0.720573
AA00010	G03	AA00010G03	85.3803	38.6097
AA00009	G04	AA00009G04	-1.58858	0.307669
AA00010	G04	AA00010G04	87.4028	83.8042
AA00009	G05	AA00009G05	0.198788	-0.312489
AA00010	G05	AA00010G05	-1.14606	-0.489219
AA00009	G06	AA00009G06	-0.371647	0.29803
AA00010	G06	AA00010G06	10.1935	0.725393
AA00009	G07	AA00009G07	1.72686	0.696474
AA00010	G07	AA00010G07	-1.89627	-2.60354
AA00009	G08	AA00009G08	-3.06825	0.040969
AA00010	G08	AA00010G08	-0.157302	-0.563123
AA00009	G09	AA00009G09	0.41659	1.33591
AA00010	G09	AA00010G09	0.399305	-0.203239
AA00009	G10	AA00009G10	-0.226445	0.201632
AA00010	G10	AA00010G10	-0.492649	1.31985
AA00009	G11	AA00009G11	1.51598	-0.447446
AA00010	G11	AA00010G11	-0.278303	0.230551
AA00011	G02	AA00011G02	1.91009	0.0859546
AA00012	G02	AA00012G02	3.89797	0.028116
AA00011	G03	AA00011G03	-0.0950725	1.10456
AA00012	G03	AA00012G03	-0.274846	0.802511
AA00011	G04	AA00011G04	0.585993	0.346228
AA00012	G04	AA00012G04	-1.12877	0.567943
AA00011	G05	AA00011G05	1.13914	0.317309
AA00012	G05	AA00012G05	0.731194	-0.238584
AA00011	G06	AA00011G06	0.14693	-0.733426
AA00012	G06	AA00012G06	0.0674151	0.532597
AA00011	G07	AA00011G07	1.02506	1.6958
AA00012	G07	AA00012G07	0.426962	1.07885
AA00011	G08	AA00011G08	2.13827	0.561517
AA00012	G08	AA00012G08	1.42609	1.49336
AA00011	G09	AA00011G09	-0.174588	1.46444
AA00012	G09	AA00012G09	5.39839	3.06786
AA00011	G10	AA00011G10	-0.496106	0.754312
AA00012	G10	AA00012G10	2.62227	0.105234
AA00011	G11	AA00011G11	1.42955	1.19774
AA00012	G11	AA00012G11	2.15901	-0.193599
AA00009	H02	AA00009H02	2.95071	1.42588
AA00010	H02	AA00010H02	1.22211	0.97924
AA00009	H03	AA00009H03	1.00431	1.1399
AA00010	H03	AA00010H03	52.5267	1.62832
AA00009	H04	AA00009H04	0.617107	0.696474
AA00010	H04	AA00010H04	2.56696	1.47408
AA00009	H05	AA00009H05	1.10457	-0.511711
AA00010	H05	AA00010H05	1.70266	1.62832
AA00009	H06	AA00009H06	-1.19446	0.609716
AA00010	H06	AA00010H06	1.10803	1.93037
AA00009	H07	AA00009H07	70.5213	75.0834
AA00010	H07	AA00010H07	1.41572	0.667554
AA00009	H08	AA00009H08	1.2152	0.976027
AA00010	H08	AA00010H08	1.93775	0.506891
AA00009	H09	AA00009H09	1.81675	2.12959
AA00010	H09	AA00010H09	1.42609	1.19131
AA00009	H10	AA00009H10	2.16247	0.982454
AA00010	H10	AA00010H10	1.09766	1.1142
AA00009	H11	AA00009H11	3.54534	3.02287
AA00010	H11	AA00010H11	0.869482	1.92394
AA00011	H02	AA00011H02	1.23594	1.60583
AA00012	H02	AA00012H02	0.620564	1.75685
AA00011	H03	AA00011H03	2.52893	2.0846
AA00012	H03	AA00012H03	1.1426	0.673981
AA00011	H04	AA00011H04	-1.24631	0.330162
AA00012	H04	AA00012H04	0.848738	0.947108
AA00011	H05	AA00011H05	4.45804	0.632208
AA00012	H05	AA00012H05	0.952454	1.52228
AA00011	H06	AA00011H06	1.73378	2.38022
AA00012	H06	AA00012H06	2.86428	1.93679
AA00011	H07	AA00011H07	1.32583	1.83075
AA00012	H07	AA00012H07	2.33533	0.603289
AA00011	H08	AA00011H08	1.84095	1.9625
AA00012	H08	AA00012H08	3.32754	2.04926
AA00011	H09	AA00011H09	1.06308	1.18489
AA00012	H09	AA00012H09	2.7087	1.05957
AA00011	H10	AA00011H10	5.8824	2.97146
AA00012	H10	AA00012H10	4.69658	1.61868
AA00011	H11	AA00011H11	0.890225	1.97535
AA00012	H11	AA00012H11	3.94637	3.33456
AA00013	A02	AA00013A02	0.538876	1.54942
AA00014	A02	AA00014A02	1.01711	0.633743
AA00013	A03	AA00013A03	1.97015	0.694788
AA00014	A03	AA00014A03	-0.094185	0.171086
AA00013	A04	AA00013A04	2.21786	-0.243376
AA00014	A04	AA00014A04	3.40141	-0.670691
AA00013	A05	AA00013A05	2.54816	1.11246
AA00014	A05	AA00014A05	1.6777	0.482737
AA00013	A06	AA00013A06	-13.0135	-1.92372
AA00014	A06	AA00014A06	21.9873	8.89087
AA00013	A07	AA00013A07	1.89101	-0.58073
AA00014	A07	AA00014A07	2.07336	-0.70282
AA00013	A08	AA00013A08	2.69266	0.0104419
AA00014	A08	AA00014A08	3.30508	-0.307634
AA00013	A09	AA00013A09	1.67082	0.550207
AA00014	A09	AA00014A09	3.17778	1.25383
AA00013	A10	AA00013A10	4.02071	0.206428
AA00014	A10	AA00014A10	2.01143	-0.468279
AA00013	A11	AA00013A11	21.1065	18.3368
AA00014	A11	AA00014A11	2.67202	-0.924509
AA00015	A02	AA00015A02	1.14097	-0.365466
AA00016	A02	AA00016A02	1.9323	-0.731736
AA00015	A03	AA00015A03	2.13529	1.17993
AA00016	A03	AA00016A03	1.19946	0.174299
AA00015	A04	AA00015A04	1.6605	0.890774
AA00016	A04	AA00016A04	2.01487	0.434543
AA00015	A05	AA00015A05	0.198262	-0.606433
AA00016	A05	AA00016A05	2.81652	-0.285144
AA00015	A06	AA00015A06	2.39333	0.559846
AA00016	A06	AA00016A06	2.05616	1.1703
AA00015	A07	AA00015A07	2.98855	-0.397595
AA00016	A07	AA00016A07	2.789	-0.224099
AA00015	A08	AA00015A08	2.14561	0.132532
AA00016	A08	AA00016A08	3.17434	-0.317273
AA00015	A09	AA00015A09	2.14217	0.302815
AA00016	A09	AA00016A09	3.28099	0.768684
AA00015	A10	AA00015A10	4.92558	-0.760652
AA00016	A10	AA00016A10	1.45406	-0.60322
AA00015	A11	AA00015A11	2.75803	-0.497195
AA00016	A11	AA00016A11	2.57912	-0.29157
AA00013	B02	AA00013B02	-0.407275	-0.773503
AA00014	B02	AA00014B02	-0.0150524	-0.519685
AA00013	B03	AA00013B03	54.8479	2.82172
AA00014	B03	AA00014B03	3.8246	4.02656
AA00013	B04	AA00013B04	-0.331583	0.807239
AA00014	B04	AA00014B04	0.886372	-0.48113
AA00013	B05	AA00013B05	2.14905	0.110042
AA00014	B05	AA00014B05	0.968945	-0.297996
AA00013	B06	AA00013B06	-5.4236	-2.55987
AA00014	B06	AA00014B06	0.298038	0.739768
AA00013	B07	AA00013B07	1.91166	-0.108435
AA00014	B07	AA00014B07	0.955183	-0.815271
AA00013	B08	AA00013B08	3.4771	-0.420085
AA00014	B08	AA00014B08	2.15593	-0.0152612
AA00013	B09	AA00013B09	1.97015	0.0104419
AA00014	B09	AA00014B09	3.11585	-0.130925
AA00013	B10	AA00013B10	1.16162	0.784748
AA00014	B10	AA00014B10	2.86125	0.559846
AA00013	B11	AA00013B11	2.09056	0.521291
AA00014	B11	AA00014B11	2.52063	0.434543
AA00015	B02	AA00015B02	1.1857	0.0265063
AA00016	B02	AA00016B02	1.72587	0.283538
AA00015	B03	AA00015B03	2.15593	0.161448
AA00016	B03	AA00016B03	2.09056	0.0554224
AA00015	B04	AA00015B04	2.12841	0.351008
AA00016	B04	AA00016B04	2.36581	0.0779126
AA00015	B05	AA00015B05	1.43686	0.955032
AA00016	B05	AA00016B05	2.90942	1.49158
AA00015	B06	AA00015B06	1.66394	0.595188
AA00016	B06	AA00016B06	1.69834	-0.387956
AA00015	B07	AA00015B07	1.60201	0.322092
AA00016	B07	AA00016B07	2.53783	0.752619
AA00015	B08	AA00015B08	1.7121	0.582336
AA00016	B08	AA00016B08	3.23627	1.05784
AA00015	B09	AA00015B09	1.50223	-0.741374
AA00016	B09	AA00016B09	2.68922	-0.535749
AA00015	B10	AA00015B10	3.01607	-0.378318
AA00016	B10	AA00016B10	3.04704	0.514866
AA00015	B11	AA00015B11	2.55848	-0.0345386
AA00016	B11	AA00016B11	2.47935	0.036145
AA00013	C02	AA00013C02	-3.57946	-1.93978
AA00014	C02	AA00014C02	-1.74565	-0.404021
AA00013	C03	AA00013C03	-2.11035	-0.712458
AA00014	C03	AA00014C03	-1.61147	0.065061
AA00013	C04	AA00013C04	0.153534	0.511653
AA00014	C04	AA00014C04	-2.28237	0.826516
AA00013	C05	AA00013C05	1.17194	0.723704
AA00014	C05	AA00014C05	-1.20892	0.633743
AA00013	C06	AA00013C06	0.0365558	0.537356
AA00014	C06	AA00014C06	1.49879	-0.217673
AA00013	C07	AA00013C07	1.9151	1.00644
AA00014	C07	AA00014C07	1.38181	0.421692
AA00013	C08	AA00013C08	2.36237	0.389563
AA00014	C08	AA00014C08	-0.276534	-0.622497
AA00013	C09	AA00013C09	-	-
AA00014	C09	AA00014C09	1.36117	0.338157
AA00013	C10	AA00013C10	2.094	0.431331
AA00014	C10	AA00014C10	1.88757	-0.208035
AA00013	C11	AA00013C11	1.66738	0.405627
AA00014	C11	AA00014C11	2.12153	-0.0666675
AA00015	C02	AA00015C02	3.08832	1.9928
AA00016	C02	AA00016C02	1.53663	0.0746997
AA00015	C03	AA00015C03	2.43118	0.765471
AA00016	C03	AA00016C03	2.56536	2.39119
AA00015	C04	AA00015C04	0.927658	1.27953
AA00016	C04	AA00016C04	1.27859	1.15102
AA00015	C05	AA00015C05	-0.431359	1.1478
AA00016	C05	AA00016C05	0.655855	0.203215
AA00015	C06	AA00015C06	1.37493	1.1703
AA00016	C06	AA00016C06	2.37957	1.34379
AA00015	C07	AA00015C07	0.4391	-0.326912
AA00016	C07	AA00016C07	1.65017	-0.246589
AA00015	C08	AA00015C08	1.35773	0.351008
AA00016	C08	AA00016C08	2.02519	0.710852
AA00015	C09	AA00015C09	2.33828	0.791174
AA00016	C09	AA00016C09	2.789	1.54942
AA00015	C10	AA00015C10	2.04928	1.06106
AA00016	C10	AA00016C10	2.77867	-0.734949
AA00015	C11	AA00015C11	2.41053	-0.866677
AA00016	C11	AA00016C11	3.93126	0.65302
AA00013	D02	AA00013D02	-1.12979	-0.950212
AA00014	D02	AA00014D02	-0.441681	0.0393579
AA00013	D03	AA00013D03	0.456303	-0.317273
AA00014	D03	AA00014D03	-1.8179	0.418479
AA00013	D04	AA00013D04	0.924218	-0.159841
AA00014	D04	AA00014D04	-0.118269	-0.114861
AA00013	D05	AA00013D05	0.556079	0.816877
AA00014	D05	AA00014D05	1.55728	-0.0859448
AA00013	D06	AA00013D06	0.452862	-0.233738
AA00014	D06	AA00014D06	0.724666	0.103616
AA00013	D07	AA00013D07	1.22355	0.550207
AA00014	D07	AA00014D07	1.80844	0.582336
AA00013	D08	AA00013D08	27.5025	-1.87553
AA00014	D08	AA00014D08	4.11361	-0.821697
AA00013	D09	AA00013D09	3.63193	-0.596794
AA00014	D09	AA00014D09	3.97599	0.598401
AA00013	D10	AA00013D10	2.6961	0.591975
AA00014	D10	AA00014D10	1.98047	0.469885
AA00013	D11	AA00013D11	2.12153	1.37913
AA00014	D11	AA00014D11	1.75339	0.807239
AA00015	D02	AA00015D02	1.85317	1.83536
AA00016	D02	AA00016D02	0.62489	0.971096
AA00015	D03	AA00015D03	1.21322	0.916477
AA00016	D03	AA00016D03	1.76027	0.672297
AA00015	D04	AA00015D04	2.2041	0.929328
AA00016	D04	AA00016D04	2.81308	0.395989
AA00015	D05	AA00015D05	0.87949	1.21206
AA00016	D05	AA00016D05	1.30956	1.86428
AA00015	D06	AA00015D06	1.17194	1.26989
AA00016	D06	AA00016D06	2.19378	0.232131
AA00015	D07	AA00015D07	2.78556	0.261047
AA00016	D07	AA00016D07	2.41053	0.550207
AA00015	D08	AA00015D08	1.50567	-0.111648
AA00016	D08	AA00016D08	1.72587	1.00323
AA00015	D09	AA00015D09	1.67082	0.643381
AA00016	D09	AA00016D09	2.84404	0.800813
AA00015	D10	AA00015D10	1.77059	0.389563
AA00016	D10	AA00016D10	1.06184	-0.429724
AA00015	D11	AA00015D11	1.18226	-0.163054
AA00016	D11	AA00016D11	1.36805	0.768684
AA00013	E02	AA00013E02	-2.13787	-0.956638
AA00014	E02	AA00014E02	-0.445121	0.874709
AA00013	E03	AA00013E03	-0.593065	-1.45785
AA00014	E03	AA00014E03	-0.520813	0.591975
AA00013	E04	AA00013E04	-0.434799	-0.924509
AA00014	E04	AA00014E04	0.432219	0.55342
AA00013	E05	AA00013E05	-1.50481	0.627317
AA00014	E05	AA00014E05	0.081283	-0.333337
AA00013	E06	AA00013E06	5.38661	1.15423
AA00014	E06	AA00014E06	-0.107947	0.347795
AA00013	E07	AA00013E07	0.480387	-0.0441772
AA00014	E07	AA00014E07	1.26827	-0.118074
AA00013	E08	AA00013E08	0.432219	-1.18154
AA00014	E08	AA00014E08	0.924218	-0.378318
AA00013	E09	AA00013E09	2.79244	0.534143
AA00014	E09	AA00014E09	2.53439	1.07712
AA00013	E10	AA00013E10	-1.0369	2.87955
AA00014	E10	AA00014E10	1.03432	1.40162
AA00013	E11	AA00013E11	1.06528	-0.0313257
AA00014	E11	AA00014E11	0.920777	-0.124499
AA00015	E02	AA00015E02	-0.300618	1.53014
AA00016	E02	AA00016E02	-0.12859	0.26426
AA00015	E03	AA00015E03	0.958623	-0.330124
AA00016	E03	AA00016E03	0.538876	-0.452214
AA00015	E04	AA00015E04	0.648974	-0.426511
AA00016	E04	AA00016E04	0.0984857	0.174299
AA00015	E05	AA00015E05	-0.606827	0.122893
AA00016	E05	AA00016E05	0.765952	-0.33655
AA00015	E06	AA00015E06	0.580163	0.376711
AA00016	E06	AA00016E06	0.325562	0.235344
AA00015	E07	AA00015E07	1.18914	0.34137
AA00016	E07	AA00016E07	1.28892	-0.950212
AA00015	E08	AA00015E08	2.56192	-0.612859
AA00016	E08	AA00016E08	1.12033	1.26989
AA00015	E09	AA00015E09	0.882931	-0.375105
AA00016	E09	AA00016E09	1.16162	0.283538
AA00015	E10	AA00015E10	1.83252	-0.538962
AA00016	E10	AA00016E10	1.27515	0.691575
AA00015	E11	AA00015E11	0.710904	1.96067
AA00016	E11	AA00016E11	1.77403	-1.28114
AA00013	F02	AA00013F02	-2.20668	-1.28114
AA00014	F02	AA00014F02	-0.610267	-0.439363
AA00013	F03	AA00013F03	-1.44288	0.457034
AA00014	F03	AA00014F03	-1.61147	-0.619285
AA00013	F04	AA00013F04	-0.0150524	-0.294783
AA00014	F04	AA00014F04	0.525114	0.193577
AA00013	F05	AA00013F05	-0.149234	0.624104
AA00014	F05	AA00014F05	-1.04722	-0.201609
AA00013	F06	AA00013F06	-1.29838	-0.320486
AA00014	F06	AA00014F06	1.44718	0.926116
AA00013	F07	AA00013F07	0.955183	1.2956
AA00014	F07	AA00014F07	1.0412	1.46909
AA00013	F08	AA00013F08	1.67082	0.672297
AA00014	F08	AA00014F08	1.313	-0.468279
AA00013	F09	AA00013F09	2.46558	1.39841
AA00014	F09	AA00014F09	1.70866	0.0746997
AA00013	F10	AA00013F10	-	-
AA00014	F10	AA00014F10	1.03776	0.344583
AA00013	F11	AA00013F11	11.9477	20.4894
AA00014	F11	AA00014F11	0.638652	-0.050603
AA00015	F02	AA00015F02	1.60889	0.216067
AA00016	F02	AA00016F02	1.45406	0.129319
AA00015	F03	AA00015F03	0.452862	0.826516
AA00016	F03	AA00016F03	0.741869	0.373499
AA00015	F04	AA00015F04	0.256751	1.37271
AA00016	F04	AA00016F04	-0.524254	-1.3454
AA00015	F05	AA00015F05	1.16162	-0.265867
AA00016	F05	AA00016F05	2.40709	0.36386
AA00015	F06	AA00015F06	2.15593	1.59761
AA00016	F06	AA00016F06	1.90821	1.79038
AA00015	F07	AA00015F07	2.53095	0.67551
AA00016	F07	AA00016F07	0.793477	0.662659
AA00015	F08	AA00015F08	1.81188	1.47552
AA00016	F08	AA00016F08	1.74651	0.749407
AA00015	F09	AA00015F09	2.50343	1.18636
AA00016	F09	AA00016F09	2.59633	-0.693181
AA00015	F10	AA00015F10	0.0709613	0.40884
AA00016	F10	AA00016F10	1.49535	0.270686
AA00015	F11	AA00015F11	2.97134	2.1181
AA00016	F11	AA00016F11	2.99887	0.832942
AA00013	G02	AA00013G02	-0.321261	-0.198396
AA00014	G02	AA00014G02	-2.07938	-0.821697
AA00013	G03	AA00013G03	-0.741008	-0.89238
AA00014	G03	AA00014G03	-2.08626	-0.934148
AA00013	G04	AA00013G04	-2.23765	-0.60322
AA00014	G04	AA00014G04	-0.541457	-0.70282
AA00013	G05	AA00013G05	-1.86607	1.61689
AA00014	G05	AA00014G05	-1.44288	-0.844187
AA00013	G06	AA00013G06	-2.35463	-1.22009
AA00014	G06	AA00014G06	-0.861428	-1.74701
AA00013	G07	AA00013G07	-1.10915	-0.0763061
AA00014	G07	AA00014G07	1.90821	0.277112
AA00013	G08	AA00013G08	-2.0553	-1.43215
AA00014	G08	AA00014G08	0.101926	-0.130925
AA00013	G09	AA00013G09	-0.820141	0.611252
AA00014	G09	AA00014G09	1.313	-0.70282
AA00013	G10	AA00013G10	-0.403834	-1.57351
AA00014	G10	AA00014G10	-0.882071	-1.00162
AA00013	G11	AA00013G11	-0.293737	-0.635349
AA00014	G11	AA00014G11	0.769393	0.656233
AA00015	G02	AA00015G02	-0.682519	1.08033
AA00016	G02	AA00016G02	-1.26397	0.183938
AA00015	G03	AA00015G03	-0.159555	-0.465066
AA00016	G03	AA00016G03	0.101926	0.662659
AA00015	G04	AA00015G04	0.734987	-0.555027
AA00016	G04	AA00016G04	-0.462324	0.595188
AA00015	G05	AA00015G05	-0.778854	0.203215
AA00016	G05	AA00016G05	0.384051	0.289963
AA00015	G06	AA00015G06	0.538876	0.428118
AA00016	G06	AA00016G06	-0.610267	-0.619285
AA00015	G07	AA00015G07	-0.238688	0.174299
AA00016	G07	AA00016G07	-0.396953	0.636955
AA00015	G08	AA00015G08	0.167297	0.357434
AA00016	G08	AA00016G08	-0.833903	-0.227312
AA00015	G09	AA00015G09	-0.259331	0.126106
AA00016	G09	AA00016G09	-0.396953	0.151809
AA00015	G10	AA00015G10	-0.0356957	-0.561453
AA00016	G10	AA00016G10	1.1685	0.110042
AA00015	G11	AA00015G11	1.67426	-0.0538159
AA00016	G11	AA00016G11	-6.59682	-2.67875
AA00013	H02	AA00013H02	-0.262772	-0.715671
AA00014	H02	AA00014H02	0.239548	-0.105222
AA00013	H03	AA00013H03	-0.985287	-0.474704
AA00014	H03	AA00014H03	-0.369429	-0.0666675
AA00013	H04	AA00013H04	-0.476086	0.171086
AA00014	H04	AA00014H04	-0.548338	-0.860251
AA00013	H05	AA00013H05	-12.9928	-4.22415
AA00014	H05	AA00014H05	0.335884	0.450608
AA00013	H06	AA00013H06	-0.864868	-0.567878
AA00014	H06	AA00014H06	-0.679079	-0.111648
AA00013	H07	AA00013H07	5.00815	4.53419
AA00014	H07	AA00014H07	-10.1475	3.13658
AA00013	H08	AA00013H08	0.848526	-0.442576
AA00014	H08	AA00014H08	0.418457	0.710852
AA00013	H09	AA00013H09	1.0412	-0.387956
AA00014	H09	AA00014H09	-2.42344	0.0393579
AA00013	H10	AA00013H10	1.37149	1.37592
AA00014	H10	AA00014H10	1.67082	1.845
AA00013	H11	AA00013H11	0.0744019	1.78396
AA00014	H11	AA00014H11	3.72138	2.28195
AA00015	H02	AA00015H02	1.01711	0.922903
AA00016	H02	AA00016H02	-1.13667	0.296389
AA00015	H03	AA00015H03	0.12257	0.48595
AA00016	H03	AA00016H03	1.04464	1.09319
AA00015	H04	AA00015H04	0.845085	0.222493
AA00016	H04	AA00016H04	-4.81462	8.91015
AA00015	H05	AA00015H05	0.559519	0.212854
AA00016	H05	AA00016H05	0.335884	0.910051
AA00015	H06	AA00015H06	0.418457	0.620891
AA00016	H06	AA00016H06	2.3314	-0.127712
AA00015	H07	AA00015H07	1.15473	1.41769
AA00016	H07	AA00016H07	0.793477	-0.571091
AA00015	H08	AA00015H08	1.43686	-0.0730932
AA00016	H08	AA00016H08	1.25451	0.874709
AA00015	H09	AA00015H09	1.12377	0.36386
AA00016	H09	AA00016H09	2.27291	-0.118074
AA00015	H10	AA00015H10	-0.0391362	-0.468279
AA00016	H10	AA00016H10	128.201	126.868
AA00015	H11	AA00015H11	2.59633	1.24098
AA00016	H11	AA00016H11	3.20874	1.83858
AA00142	A02	AA00142A02	-0.00587055	1.65051
AA00143	A02	AA00143A02	0.380281	0.797909
AA00142	A03	AA00142A03	0.223733	0.419688
AA00143	A03	AA00143A03	1.50395	0.836372
AA00142	A04	AA00142A04	1.10736	0.153652
AA00143	A04	AA00143A04	0.101974	0.954966
AA00142	A05	AA00142A05	0.679462	0.400457
AA00143	A05	AA00143A05	0.00804483	-0.070716
AA00142	A06	AA00142A06	1.33348	-0.442526
AA00143	A06	AA00143A06	-0.586838	0.720982
AA00142	A07	AA00142A07	-0.478993	-0.314316
AA00143	A07	AA00143A07	-1.47046	-0.0643055
AA00142	A08	AA00142A08	0.742081	0.515846
AA00143	A08	AA00143A08	1.52134	0.150447
AA00142	A09	AA00142A09	2.79808	0.679314
AA00143	A09	AA00143A09	1.59788	0.714572
AA00142	A10	AA00142A10	1.75095	-0.0643055
AA00143	A10	AA00143A10	1.96663	0.865219
AA00142	A11	AA00142A11	-0.0789263	-0.25021
AA00143	A11	AA00143A11	0.815137	0.451741
AA00144	A02	AA00144A02	-0.131109	0.650467
AA00145	A02	AA00145A02	-0.736428	0.496615
AA00144	A03	AA00144A03	2.18928	0.698546
AA00145	A03	AA00145A03	0.627279	1.55114
AA00144	A04	AA00144A04	1.2987	0.179294
AA00145	A04	AA00145A04	-0.538134	0.336352
AA00144	A05	AA00144A05	0.738602	1.36524
AA00145	A05	AA00145A05	0.0845794	0.656877
AA00144	A06	AA00144A06	2.00142	0.663288
AA00145	A06	AA00145A06	0.237649	0.743419
AA00144	A07	AA00144A07	7.01096	6.88469
AA00145	A07	AA00145A07	0.275916	-0.753436
AA00144	A08	AA00144A08	0.0323967	0.791498
AA00145	A08	AA00145A08	0.996037	-0.105974
AA00144	A09	AA00144A09	0.818616	0.349173
AA00145	A09	AA00145A09	0.571618	0.281862
AA00144	A10	AA00144A10	2.53021	0.262631
AA00145	A10	AA00145A10	0.529872	-0.352779
AA00144	A11	AA00144A11	0.195902	-0.144437
AA00145	A11	AA00145A11	1.21868	0.410073
AA00142	B02	AA00142B02	-2.74024	-0.843183
AA00143	B02	AA00143B02	-0.0928417	-0.0611002
AA00142	B03	AA00142B03	-0.938201	0.579951
AA00143	B03	AA00143B03	-0.722512	0.698546
AA00142	B04	AA00142B04	0.41507	1.07356
AA00143	B04	AA00143B04	-1.42524	0.769061
AA00142	B05	AA00142B05	0.00804483	-0.179695
AA00143	B05	AA00143B05	0.540308	0.698546
AA00142	B06	AA00142B06	-0.416374	-0.525862
AA00143	B06	AA00143B06	-0.736428	-0.150847
AA00142	B07	AA00142B07	0.258522	0.387636
AA00143	B07	AA00143B07	0.0358756	-0.285468
AA00142	B08	AA00142B08	0.17155	-0.0130213
AA00143	B08	AA00143B08	0.56466	0.0574943
AA00142	B09	AA00142B09	0.216776	0.291478
AA00143	B09	AA00143B09	0.77339	1.48383
AA00142	B10	AA00142B10	2.04665	1.22421
AA00143	B10	AA00143B10	0.693377	0.903682
AA00142	B11	AA00142B11	1.14563	0.0510838
AA00143	B11	AA00143B11	0.996037	1.02869
AA00144	B02	AA00144B02	0.237649	0.413278
AA00145	B02	AA00145B02	-0.517261	0.538283
AA00144	B03	AA00144B03	0.17155	1.43575
AA00145	B03	AA00145B03	1.99099	1.60884
AA00144	B04	AA00144B04	2.59631	0.858808
AA00145	B04	AA00145B04	2.03621	0.224168
AA00144	B05	AA00144B05	0.345493	-0.0643055
AA00145	B05	AA00145B05	-1.50873	-0.602789
AA00144	B06	AA00144B06	-1.794	-0.221363
AA00145	B06	AA00145B06	-8.92563	-3.20225
AA00144	B07	AA00144B07	0.874277	0.442125
AA00145	B07	AA00145B07	0.38376	-0.128411
AA00144	B08	AA00144B08	-0.538134	-0.830362
AA00145	B08	AA00145B08	0.846446	1.4005
AA00144	B09	AA00144B09	1.48307	1.17613
AA00145	B09	AA00145B09	1.34044	0.313915
AA00144	B10	AA00144B10	1.51091	1.36524
AA00145	B10	AA00145B10	-0.0232648	0.663288
AA00144	B11	AA00144B11	1.38567	-0.497015
AA00145	B11	AA00145B11	0.0567486	0.144036
AA00142	C02	AA00142C02	-0.705118	-0.230979
AA00143	C02	AA00143C02	-1.20607	-0.599583
AA00142	C03	AA00142C03	-1.57831	-1.32397
AA00143	C03	AA00143C03	-1.74181	0.740214
AA00142	C04	AA00142C04	0.119368	2.16014
AA00143	C04	AA00143C04	-1.65484	0.624825
AA00142	C05	AA00142C05	-1.24434	0.224168
AA00143	C05	AA00143C05	-0.155461	-0.339958
AA00142	C06	AA00142C06	-0.858187	-0.291879
AA00143	C06	AA00143C06	-0.0441378	0.054289
AA00142	C07	AA00142C07	25.5184	27.8375
AA00143	C07	AA00143C07	-0.840793	0.336352
AA00142	C08	AA00142C08	0.710771	-0.163668
AA00143	C08	AA00143C08	-1.3	-0.070716
AA00142	C09	AA00142C09	-0.0128282	-0.801515
AA00143	C09	AA00143C09	-0.301572	1.11523
AA00142	C10	AA00142C10	-1.16085	0.413278
AA00143	C10	AA00143C10	1.61179	-0.641252
AA00142	C11	AA00142C11	0.679462	1.93578
AA00143	C11	AA00143C11	0.0845794	-0.785488
AA00144	C02	AA00144C02	1.59788	0.743419
AA00145	C02	AA00145C02	2.59631	1.37485
AA00144	C03	AA00144C03	-4.17701	-1.97784
AA00145	C03	AA00145C03	0.648152	1.49986
AA00144	C04	AA00144C04	0.794264	0.970992
AA00145	C04	AA00145C04	0.00804483	1.37485
AA00144	C05	AA00144C05	-0.0789263	1.76269
AA00145	C05	AA00145C05	-0.708597	-0.503426
AA00144	C06	AA00144C06	-0.378107	1.1569
AA00145	C06	AA00145C06	-0.378107	0.583156
AA00144	C07	AA00144C07	0.543787	0.682519
AA00145	C07	AA00145C07	0.286352	1.04792
AA00144	C08	AA00144C08	-0.33984	0.932529
AA00145	C08	AA00145C08	0.71425	0.62803
AA00144	C09	AA00144C09	-0.625105	1.48383
AA00145	C09	AA00145C09	1.98403	3.51597
AA00144	C10	AA00144C10	0.526393	0.785088
AA00145	C10	AA00145C10	1.60483	3.19865
AA00144	C11	AA00144C11	1.59788	0.929324
AA00145	C11	AA00145C11	1.98403	-0.179695
AA00142	D02	AA00142D02	-0.225038	-0.112384
AA00143	D02	AA00143D02	-1.31044	0.618414
AA00142	D03	AA00142D03	0.373323	-0.25021
AA00143	D03	AA00143D03	0.982121	0.118394
AA00142	D04	AA00142D04	-0.945159	-0.612404
AA00143	D04	AA00143D04	0.8047	-0.452141
AA00142	D05	AA00142D05	-2.35061	-0.791899
AA00143	D05	AA00143D05	-1.21999	0.993429
AA00142	D06	AA00142D06	-0.576401	0.0510838
AA00143	D06	AA00143D06	-2.80286	0.246604
AA00142	D07	AA00142D07	-1.17476	1.69859
AA00143	D07	AA00143D07	0.115889	0.13442
AA00142	D08	AA00142D08	1.29174	0.0639048
AA00143	D08	AA00143D08	-0.719034	-0.320726
AA00142	D09	AA00142D09	1.00299	0.845987
AA00143	D09	AA00143D09	1.06214	1.14408
AA00142	D10	AA00142D10	7.03183	7.21483
AA00143	D10	AA00143D10	0.672504	0.474178
AA00142	D11	AA00142D11	1.08301	0.105573
AA00143	D11	AA00143D11	-0.0963205	-0.336752
AA00144	D02	AA00144D02	0.554223	0.804319
AA00145	D02	AA00145D02	1.86227	1.58961
AA00144	D03	AA00144D03	-0.165897	0.493409
AA00145	D03	AA00145D03	2.55804	3.40699
AA00144	D04	AA00144D04	1.10388	1.22741
AA00145	D04	AA00145D04	1.37871	0.592772
AA00144	D05	AA00144D05	1.78921	1.16331
AA00145	D05	AA00145D05	1.22216	0.778677
AA00144	D06	AA00144D06	2.59283	1.56076
AA00145	D06	AA00145D06	0.481168	0.307504
AA00144	D07	AA00144D07	-0.468557	0.496615
AA00145	D07	AA00145D07	1.48655	0.711367
AA00144	D08	AA00144D08	0.105453	1.44537
AA00145	D08	AA00145D08	-0.423332	0.281862
AA00144	D09	AA00144D09	0.749039	1.83641
AA00145	D09	AA00145D09	0.14372	1.39729
AA00144	D10	AA00144D10	0.38376	0.820345
AA00145	D10	AA00145D10	-0.395501	-0.779078
AA00144	D11	AA00144D11	1.21868	0.605593
AA00145	D11	AA00145D11	-0.962553	-0.913698
AA00142	E02	AA00142E02	0.411591	-0.708562
AA00143	E02	AA00143E02	0.0532698	0.0767258
AA00142	E03	AA00142E03	0.0393544	0.381225
AA00143	E03	AA00143E03	-0.273742	-0.474578
AA00142	E04	AA00142E04	0.0602275	-0.80472
AA00143	E04	AA00143E04	-0.534655	0.0799311
AA00142	E05	AA00142E05	0.0602275	0.323531
AA00143	E05	AA00143E05	-0.430289	-0.948956
AA00142	E06	AA00142E06	-0.468557	0.397251
AA00143	E06	AA00143E06	-0.927764	-0.0739212
AA00142	E07	AA00142E07	-2.80982	0.868424
AA00143	E07	AA00143E07	-0.76078	0.746625
AA00142	E08	AA00142E08	0.602927	0.105573
AA00143	E08	AA00143E08	0.884714	1.19536
AA00142	E09	AA00142E09	0.721208	-0.279058
AA00143	E09	AA00143E09	-0.962553	0.208141
AA00142	E10	AA00142E10	0.818616	-0.00661084
AA00143	E10	AA00143E10	0.296789	-0.00661084
AA00142	E11	AA00142E11	2.63457	0.0703153
AA00143	E11	AA00143E11	1.0517	-0.125205
AA00144	E02	AA00144E02	-1.80443	2.05757
AA00145	E02	AA00145E02	0.188945	0.435715
AA00144	E03	AA00144E03	-0.764259	0.551104
AA00145	E03	AA00145E03	0.898629	-0.458552
AA00144	E04	AA00144E04	0.140241	-0.923314
AA00145	E04	AA00145E04	-1.0043	-0.070716
AA00144	E05	AA00144E05	0.801221	-1.57398
AA00145	E05	AA00145E05	0.150677	-0.416884
AA00144	E06	AA00144E06	0.133283	0.605593
AA00145	E06	AA00145E06	0.92646	-0.939341
AA00144	E07	AA00144E07	0.856883	0.413278
AA00145	E07	AA00145E07	-0.0267436	-0.564326
AA00144	E08	AA00144E08	-0.440726	0.551104
AA00145	E08	AA00145E08	0.884714	-0.532273
AA00144	E09	AA00144E09	1.01343	1.37165
AA00145	E09	AA00145E09	0.679462	0.813935
AA00144	E10	AA00144E10	-1.09475	0.150447
AA00145	E10	AA00145E10	0.526393	-0.0739212
AA00144	E11	AA00144E11	-0.39898	-0.253416
AA00145	E11	AA00145E11	-0.176334	-0.279058
AA00142	F02	AA00142F02	0.14372	-0.170079
AA00143	F02	AA00143F02	-0.207644	-0.0098161
AA00142	F03	AA00142F03	-0.204165	0.0510838
AA00143	F03	AA00143F03	-0.725991	-0.3656
AA00142	F04	AA00142F04	-0.204165	-0.484194
AA00143	F04	AA00143F04	0.435943	0.137626
AA00142	F05	AA00142F05	-0.371149	0.269041
AA00143	F05	AA00143F05	0.4429	0.285067
AA00142	F06	AA00142F06	0.418548	0.75624
AA00143	F06	AA00143F06	0.279395	0.43892
AA00142	F07	AA00142F07	2.16145	0.160062
AA00143	F07	AA00143F07	0.209818	-0.279058
AA00142	F08	AA00142F08	1.32653	1.56717
AA00143	F08	AA00143F08	1.1004	0.166473
AA00142	F09	AA00142F09	1.8414	0.804319
AA00143	F09	AA00143F09	1.82052	0.573541
AA00142	F10	AA00142F10	0.289831	-0.477784
AA00143	F10	AA00143F10	1.14563	0.387636
AA00142	F11	AA00142F11	-1.51569	-0.314316
AA00143	F11	AA00143F11	-0.771216	0.0703153
AA00144	F02	AA00144F02	-0.499866	0.75624
AA00145	F02	AA00145F02	-0.948637	1.74346
AA00144	F03	AA00144F03	1.37523	0.503025
AA00145	F03	AA00145F03	-0.719034	0.124805
AA00144	F04	AA00144F04	-0.221559	-0.211747
AA00145	F04	AA00145F04	-0.085884	-0.112384
AA00144	F05	AA00144F05	-0.162418	-0.436115
AA00145	F05	AA00145F05	0.971685	0.220962
AA00144	F06	AA00144F06	0.0845794	-0.641252
AA00145	F06	AA00145F06	-0.134588	0.18891
AA00144	F07	AA00144F07	1.32653	0.849193
AA00145	F07	AA00145F07	1.07257	0.448536
AA00144	F08	AA00144F08	2.16493	-0.320726
AA00145	F08	AA00145F08	0.724687	-0.323931
AA00144	F09	AA00144F09	0.209818	-0.173284
AA00145	F09	AA00145F09	-0.0545744	1.47422
AA00144	F10	AA00144F10	3.41035	0.400457
AA00145	F10	AA00145F10	-0.336361	1.57679
AA00144	F11	AA00144F11	0.310704	0.977403
AA00145	F11	AA00145F11	0.460295	0.913298
AA00142	G02	AA00142G02	-3.18553	-0.416884
AA00143	G02	AA00143G02	-0.513782	0.509436
AA00142	G03	AA00142G03	-0.378107	-0.942546
AA00143	G03	AA00143G03	-2.62196	-1.08999
AA00142	G04	AA00142G04	-2.43758	-0.785488
AA00143	G04	AA00143G04	-2.18711	-1.16691
AA00142	G05	AA00142G05	-1.70703	-1.26948
AA00143	G05	AA00143G05	-1.85662	-0.62202
AA00142	G06	AA00142G06	-1.67224	-0.282263
AA00143	G06	AA00143G06	0.380281	-0.881646
AA00142	G07	AA00142G07	0.916023	-0.910493
AA00143	G07	AA00143G07	-1.48786	-0.0226371
AA00142	G08	AA00142G08	-2.09318	-0.0322529
AA00143	G08	AA00143G08	-1.25478	-0.641252
AA00142	G09	AA00142G09	-0.844272	-1.13166
AA00143	G09	AA00143G09	0.693377	-1.18615
AA00142	G10	AA00142G10	-0.611189	-1.16691
AA00143	G10	AA00143G10	1.07953	-1.2182
AA00142	G11	AA00142G11	-0.461599	0.217757
AA00143	G11	AA00143G11	-1.73833	-0.763051
AA00144	G02	AA00144G02	0.742081	-0.807925
AA00145	G02	AA00145G02	0.286352	0.156857
AA00144	G03	AA00144G03	1.42046	-0.330342
AA00145	G03	AA00145G03	-1.72442	0.397251
AA00144	G04	AA00144G04	-0.652936	0.910092
AA00145	G04	AA00145G04	-1.44611	-0.186105
AA00144	G05	AA00144G05	-0.040659	-0.400857
AA00145	G05	AA00145G05	-0.0824051	-0.426499
AA00144	G06	AA00144G06	0.491604	-0.0098161
AA00145	G06	AA00145G06	0.735123	-0.551504
AA00144	G07	AA00144G07	0.613364	-0.279058
AA00145	G07	AA00145G07	-0.468557	-0.795104
AA00144	G08	AA00144G08	0.0323967	0.0126207
AA00145	G08	AA00145G08	1.01343	0.833166
AA00144	G09	AA00144G09	1.08301	-0.474578
AA00145	G09	AA00145G09	-1.41828	-0.56112
AA00144	G10	AA00144G10	-1.01821	0.313915
AA00145	G10	AA00145G10	-0.214601	0.275452
AA00144	G11	AA00144G11	0.119368	-0.583557
AA00145	G11	AA00145G11	1.11432	-0.105974
AA00142	H02	AA00142H02	0.547266	-0.138026
AA00143	H02	AA00143H02	0.481168	0.496615
AA00142	H03	AA00142H03	1.91097	0.403662
AA00143	H03	AA00143H03	0.829052	1.66012
AA00142	H04	AA00142H04	-0.381586	1.22421
AA00143	H04	AA00143H04	0.0358756	0.169678
AA00142	H05	AA00142H05	3.91131	-0.25021
AA00143	H05	AA00143H05	0.321141	-0.125205
AA00142	H06	AA00142H06	0.495083	-0.349573
AA00143	H06	AA00143H06	1.55265	-0.81113
AA00142	H07	AA00142H07	1.07257	-0.711767
AA00143	H07	AA00143H07	0.65511	0.0639048
AA00142	H08	AA00142H08	1.20825	0.788293
AA00143	H08	AA00143H08	1.35088	0.666493
AA00142	H09	AA00142H09	1.35088	0.512641
AA00143	H09	AA00143H09	1.86923	0.692135
AA00142	H10	AA00142H10	0.992558	-1.43295
AA00143	H10	AA00143H10	1.96663	0.342762
AA00142	H11	AA00142H11	2.89201	-0.75023
AA00143	H11	AA00143H11	0.168072	0.349173
AA00144	H02	AA00144H02	1.66745	0.881245
AA00145	H02	AA00145H02	-0.263305	0.836372
AA00144	H03	AA00144H03	0.394197	0.201731
AA00145	H03	AA00145H03	-0.0719686	-0.0162266
AA00144	H04	AA00144H04	0.909065	-0.99383
AA00145	H04	AA00145H04	1.33696	-0.352779
AA00144	H05	AA00144H05	0.56466	0.326736
AA00145	H05	AA00145H05	2.33539	-0.0450739
AA00144	H06	AA00144H06	1.81009	0.387636
AA00145	H06	AA00145H06	1.07953	0.862014
AA00144	H07	AA00144H07	0.679462	1.49666
AA00145	H07	AA00145H07	2.23103	0.166473
AA00144	H08	AA00144H08	2.83982	0.0703153
AA00145	H08	AA00145H08	2.16841	0.602388
AA00144	H09	AA00144H09	1.31609	0.538283
AA00145	H09	AA00145H09	2.14405	-0.394447
AA00144	H10	AA00144H10	2.83982	0.461357
AA00145	H10	AA00145H10	3.15292	1.1601
AA00144	H11	AA00144H11	1.91097	0.961377
AA00145	H11	AA00145H11	1.8901	0.333146
AA00146	A02	AA00146A02	0.17812	1.25997
AA00147	A02	AA00147A02	-0.696045	0.951796
AA00146	A03	AA00146A03	0.519258	0.393238
AA00147	A03	AA00147A03	0.266958	0.0337061
AA00146	A04	AA00146A04	-0.0102164	0.650046
AA00147	A04	AA00147A04	-0.0812867	0.75919
AA00146	A05	AA00146A05	0.0501934	1.23429
AA00147	A05	AA00147A05	-1.64484	2.10743
AA00146	A06	AA00146A06	-0.884382	0.44781
AA00147	A06	AA00147A06	0.494383	0.845863
AA00146	A07	AA00146A07	0.817753	0.560163
AA00147	A07	AA00147A07	-1.03008	-0.210262
AA00146	A08	AA00146A08	0.067961	1.3338
AA00147	A08	AA00147A08	-0.8524	-0.242363
AA00146	A09	AA00146A09	0.473062	0.76561
AA00147	A09	AA00147A09	0.0182118	-0.213472
AA00146	A10	AA00146A10	15.8562	0.823392
AA00147	A10	AA00147A10	-0.390443	-0.585844
AA00146	A11	AA00146A11	0.419759	-0.274464
AA00147	A11	AA00147A11	-0.934131	-0.778451
AA00148	A02	AA00148A02	1.6244	0.736719
AA00149	A02	AA00149A02	-0.0173234	0.512012
AA00148	A03	AA00148A03	0.0928357	1.01921
AA00149	A03	AA00149A03	1.24062	-0.0337061
AA00148	A04	AA00148A04	0.576114	0.7624
AA00149	A04	AA00149A04	1.33657	0.833022
AA00148	A05	AA00148A05	1.40053	-0.107538
AA00149	A05	AA00149A05	1.35434	-0.650046
AA00148	A06	AA00148A06	-0.180785	0.290515
AA00149	A06	AA00149A06	-1.77632	-0.197421
AA00148	A07	AA00148A07	-0.763562	0.0497566
AA00149	A07	AA00149A07	0.888824	0.537693
AA00148	A08	AA00148A08	-0.859507	-0.101118
AA00149	A08	AA00149A08	-0.298051	-0.971057
AA00148	A09	AA00148A09	0.29894	-0.0272859
AA00149	A09	AA00149A09	-0.21632	0.650046
AA00148	A10	AA00148A10	-1.49203	-0.672517
AA00149	A10	AA00149A10	-0.592993	-0.938956
AA00148	A11	AA00148A11	-0.827526	-0.524852
AA00149	A11	AA00149A11	0.672059	1.2375
AA00146	B02	AA00146B02	-1.44939	-0.181371
AA00147	B02	AA00147B02	-1.53112	-0.399658
AA00146	B03	AA00146B03	-0.51837	-0.518432
AA00147	B03	AA00147B03	-0.177232	0.633996
AA00146	B04	AA00146B04	-1.35345	-1.02242
AA00147	B04	AA00147B04	-0.0919473	0.518432
AA00146	B05	AA00146B05	-2.0606	0.174951
AA00147	B05	AA00147B05	-3.21194	-0.325826
AA00146	B06	AA00146B06	-3.75207	-1.14761
AA00147	B06	AA00147B06	-0.880828	1.08662
AA00146	B07	AA00146B07	-0.738688	-0.0112354
AA00147	B07	AA00147B07	-0.436639	-0.865123
AA00146	B08	AA00146B08	-1.44584	-0.0850678
AA00147	B08	AA00147B08	-1.18288	-0.030496
AA00146	B09	AA00146B09	-4.56938	-0.733509
AA00147	B09	AA00147B09	-1.69103	0.733509
AA00146	B10	AA00146B10	0.188781	-0.325826
AA00147	B10	AA00147B10	-1.13313	-0.624366
AA00146	B11	AA00146B11	-1.57376	-1.15724
AA00147	B11	AA00147B11	-1.39964	-0.345086
AA00148	B02	AA00148B02	1.22285	0.354717
AA00149	B02	AA00149B02	1.67415	0.556953
AA00148	B03	AA00148B03	1.06295	-0.290515
AA00149	B03	AA00149B03	1.08427	0.630786
AA00148	B04	AA00148B04	1.16244	0.171741
AA00149	B04	AA00149B04	0.842628	-0.650046
AA00148	B05	AA00148B05	-0.802651	-0.508802
AA00149	B05	AA00149B05	-0.653403	-0.45423
AA00148	B06	AA00148B06	-0.401103	0.502382
AA00149	B06	AA00149B06	2.24982	-0.861913
AA00148	B07	AA00148B07	-0.219874	-0.685357
AA00149	B07	AA00149B07	-0.177232	0.390028
AA00148	B08	AA00148B08	0.505044	-0.524852
AA00149	B08	AA00149B08	-0.610761	0.216682
AA00148	B09	AA00148B09	-1.12247	1.00316
AA00149	B09	AA00149B09	1.16244	0.0818577
AA00148	B10	AA00148B10	1.43251	-1.10588
AA00149	B10	AA00149B10	-0.923471	-0.425339
AA00148	B11	AA00148B11	-0.717367	1.4943
AA00149	B11	AA00149B11	-1.16866	-1.21503
AA00146	C02	AA00146C02	-3.21194	-1.13477
AA00147	C02	AA00147C02	-1.54178	-0.030496
AA00146	C03	AA00146C03	-2.91699	-1.29207
AA00147	C03	AA00147C03	-1.39964	-1.41405
AA00146	C04	AA00146C04	-1.79053	0.104328
AA00147	C04	AA00147C04	-1.12602	-0.422129
AA00146	C05	AA00146C05	-1.33923	0.251993
AA00147	C05	AA00147C05	-2.73576	-0.329036
AA00146	C06	AA00146C06	-2.08902	0.390028
AA00147	C06	AA00147C06	-1.76565	-0.409288
AA00146	C07	AA00146C07	-1.1509	-0.550533
AA00147	C07	AA00147C07	-2.20984	-0.16853
AA00146	C08	AA00146C08	-1.95399	-0.399658
AA00147	C08	AA00147C08	-1.95044	0.174951
AA00146	C09	AA00146C09	0.17812	-0.354717
AA00147	C09	AA00147C09	-1.53823	-0.229522
AA00146	C10	AA00146C10	-1.58442	-0.804131
AA00147	C10	AA00147C10	-1.357	-0.300145
AA00146	C11	AA00146C11	-3.44647	-0.999948
AA00147	C11	AA00147C11	-0.617868	-0.191001
AA00148	C02	AA00148C02	1.11625	0.531273
AA00149	C02	AA00149C02	0.853289	-0.261624
AA00148	C03	AA00148C03	-0.404657	0.00160505
AA00149	C03	AA00149C03	2.26759	0.515222
AA00148	C04	AA00148C04	1.1198	0.476701
AA00149	C04	AA00149C04	-0.351354	1.01921
AA00148	C05	AA00148C05	-0.610761	-0.0658072
AA00149	C05	AA00149C05	-0.344247	0.701408
AA00148	C06	AA00148C06	1.22285	0.701408
AA00149	C06	AA00149C06	-1.18288	-0.059387
AA00148	C07	AA00148C07	-1.3108	1.08662
AA00149	C07	AA00149C07	-0.760009	0.393238
AA00148	C08	AA00148C08	0.0466399	0.76882
AA00149	C08	AA00149C08	-0.493495	-0.258414
AA00148	C09	AA00148C09	-0.0102164	0.922905
AA00149	C09	AA00149C09	-2.0606	-0.418919
AA00148	C10	AA00148C10	-0.742241	0.550533
AA00149	C10	AA00149C10	0.412652	0.319406
AA00148	C11	AA00148C11	0.11771	0.46707
AA00149	C11	AA00149C11	-0.578779	-0.117169
AA00146	D02	AA00146D02	-1.06561	-0.537693
AA00147	D02	AA00147D02	-1.57021	-0.633996
AA00146	D03	AA00146D03	-0.834633	0.364347
AA00147	D03	AA00147D03	-2.13522	-0.306565
AA00146	D04	AA00146D04	-0.902149	0.14285
AA00147	D04	AA00147D04	-0.84174	-0.030496
AA00146	D05	AA00146D05	-2.48346	-0.14285
AA00147	D05	AA00147D05	-0.738688	-0.0625971
AA00146	D06	AA00146D06	-1.66616	0.0337061
AA00147	D06	AA00147D06	-1.45294	-0.810552
AA00146	D07	AA00146D07	-0.301605	0.316195
AA00147	D07	AA00147D07	-1.73012	0.245573
AA00146	D08	AA00146D08	-1.42452	-0.200632
AA00147	D08	AA00147D08	-0.838186	0.608315
AA00146	D09	AA00146D09	0.252744	1.50714
AA00147	D09	AA00147D09	-0.351354	-0.76882
AA00146	D10	AA00146D10	-1.15445	0.624366
AA00147	D10	AA00147D10	-1.61285	-0.181371
AA00146	D11	AA00146D11	-0.603654	-0.736719
AA00147	D11	AA00147D11	-0.795544	-0.00802526
AA00148	D02	AA00148D02	1.90158	-0.184581
AA00149	D02	AA00149D02	1.62796	0.45744
AA00148	D03	AA00148D03	0.650738	-0.361137
AA00149	D03	AA00149D03	0.455294	-0.0946981
AA00148	D04	AA00148D04	-0.0670727	0.354717
AA00149	D04	AA00149D04	-0.415317	0.778451
AA00148	D05	AA00148D05	-0.0848403	0.351506
AA00149	D05	AA00149D05	-0.411764	-0.104328
AA00148	D06	AA00148D06	-0.14525	1.63555
AA00149	D06	AA00149D06	-0.863061	-0.030496
AA00148	D07	AA00148D07	-0.223428	-0.0882779
AA00149	D07	AA00149D07	-1.54178	0.0754375
AA00148	D08	AA00148D08	-0.465067	-0.14927
AA00149	D08	AA00149D08	-1.19354	0.528062
AA00148	D09	AA00148D09	-1.47427	0.694988
AA00149	D09	AA00149D09	-0.994541	0.0850678
AA00148	D10	AA00148D10	-2.24183	-0.675727
AA00149	D10	AA00149D10	-2.1601	-1.02884
AA00148	D11	AA00148D11	-0.450853	-0.662887
AA00149	D11	AA00149D11	-0.72092	0.030496
AA00146	E02	AA00146E02	-2.16365	-0.126799
AA00147	E02	AA00147E02	-1.12247	0.675727
AA00146	E03	AA00146E03	-2.91699	-0.540903
AA00147	E03	AA00147E03	-1.69458	-0.778451
AA00146	E04	AA00146E04	-1.35345	-2.12027
AA00147	E04	AA00147E04	-1.06916	-0.486331
AA00146	E05	AA00146E05	-2.50479	0.13964
AA00147	E05	AA00147E05	-2.35198	-0.698198
AA00146	E06	AA00146E06	-2.42661	0.187791
AA00147	E06	AA00147E06	-1.37832	-0.836233
AA00146	E07	AA00146E07	-1.68037	0.409288
AA00147	E07	AA00147E07	-1.43162	0.345086
AA00146	E08	AA00146E08	-2.04994	-0.210262
AA00147	E08	AA00147E08	-2.80683	-0.367557
AA00146	E09	AA00146E09	-0.870168	-0.210262
AA00147	E09	AA00147E09	-1.60219	-0.0208657
AA00146	E10	AA00146E10	-1.01941	-0.0401263
AA00147	E10	AA00147E10	-1.38187	-0.0561768
AA00146	E11	AA00146E11	-1.56666	-0.178161
AA00147	E11	AA00147E11	-1.11536	0.926115
AA00148	E02	AA00148E02	1.17311	-0.325826
AA00149	E02	AA00149E02	-6.37101	-1.66123
AA00148	E03	AA00148E03	-0.0244304	-0.797711
AA00149	E03	AA00149E03	0.0750681	0.338666
AA00148	E04	AA00148E04	0.423313	-1.43331
AA00149	E04	AA00149E04	-0.934131	-0.733509
AA00148	E05	AA00148E05	-2.22761	-0.0818577
AA00149	E05	AA00149E05	-1.46716	-0.293725
AA00148	E06	AA00148E06	-0.575226	0.309775
AA00149	E06	AA00149E06	-2.35554	-0.14606
AA00148	E07	AA00148E07	-0.13459	-0.967847
AA00149	E07	AA00149E07	-2.37331	-0.598685
AA00148	E08	AA00148E08	-1.53112	-1.16045
AA00149	E08	AA00149E08	-0.838186	-0.547323
AA00148	E09	AA00148E09	-1.14734	-1.12193
AA00149	E09	AA00149E09	-1.00165	1.13798
AA00148	E10	AA00148E10	-2.3129	-0.739929
AA00149	E10	AA00149E10	-3.04137	-0.688568
AA00148	E11	AA00148E11	-1.66616	-0.251993
AA00149	E11	AA00149E11	-1.47427	-0.126799
AA00146	F02	AA00146F02	-1.21131	-0.531273
AA00147	F02	AA00147F02	-0.688938	-0.200632
AA00146	F03	AA00146F03	-1.34279	-0.489541
AA00147	F03	AA00147F03	-1.5631	-0.174951
AA00146	F04	AA00146F04	-1.59864	0.842653
AA00147	F04	AA00147F04	-0.230535	-0.0144455
AA00146	F05	AA00146F05	-0.891489	-0.816972
AA00147	F05	AA00147F05	-0.219874	0.296935
AA00146	F06	AA00146F06	-2.91699	0.1589
AA00147	F06	AA00147F06	-2.02861	0.412498
AA00146	F07	AA00146F07	-1.51691	0.75919
AA00147	F07	AA00147F07	-2.25604	-0.383608
AA00146	F08	AA00146F08	-0.859507	0.431759
AA00147	F08	AA00147F08	-1.58087	0.0497566
AA00146	F09	AA00146F09	-0.987434	0.906855
AA00147	F09	AA00147F09	-2.91344	0.329036
AA00146	F10	AA00146F10	-1.09404	-0.325826
AA00147	F10	AA00147F10	1.03807	1.10909
AA00146	F11	AA00146F11	-0.827526	0.0529667
AA00147	F11	AA00147F11	-2.30224	-0.836233
AA00148	F02	AA00148F02	1.25128	-0.232733
AA00149	F02	AA00149F02	1.0203	-0.76561
AA00148	F03	AA00148F03	-2.00019	-0.739929
AA00149	F03	AA00149F03	1.38987	1.12193
AA00148	F04	AA00148F04	-0.0173234	-0.300145
AA00149	F04	AA00149F04	-1.7621	0.711038
AA00148	F05	AA00148F05	-0.13459	-0.483121
AA00149	F05	AA00149F05	1.09493	0.354717
AA00148	F06	AA00148F06	-0.315819	0.030496
AA00149	F06	AA00149F06	-1.06561	-0.16532
AA00148	F07	AA00148F07	-1.8083	0.0882779
AA00149	F07	AA00149F07	-0.301605	-0.518432
AA00148	F08	AA00148F08	-0.674724	-0.906855
AA00149	F08	AA00149F08	-1.49914	0.415709
AA00148	F09	AA00148F09	0.37001	0.508802
AA00149	F09	AA00149F09	-1.95754	0.367557
AA00148	F10	AA00148F10	-1.89358	-1.28565
AA00149	F10	AA00149F10	-2.6185	-0.582634
AA00148	F11	AA00148F11	-2.18852	0.746349
AA00149	F11	AA00149F11	-0.454406	0.553743
AA00146	G02	AA00146G02	-0.760009	-1.14119
AA00147	G02	AA00147G02	-1.21131	-1.16687
AA00146	G03	AA00146G03	-3.46779	-1.39479
AA00147	G03	AA00147G03	-3.35408	-0.44781
AA00146	G04	AA00146G04	-1.38898	-1.27602
AA00147	G04	AA00147G04	-1.91846	0.386818
AA00146	G05	AA00146G05	-2.13522	-0.974267
AA00147	G05	AA00147G05	-3.51043	-0.46707
AA00146	G06	AA00146G06	-2.45504	-1.26318
AA00147	G06	AA00147G06	-3.43581	-1.41405
AA00146	G07	AA00146G07	-2.78551	-0.682147
AA00147	G07	AA00147G07	-2.92766	-0.983897
AA00146	G08	AA00146G08	-1.43873	-0.874754
AA00147	G08	AA00147G08	-0.585886	-1.52961
AA00146	G09	AA00146G09	-2.34843	-1.07699
AA00147	G09	AA00147G09	-2.1139	0.839443
AA00146	G10	AA00146G10	-2.28802	-0.605105
AA00147	G10	AA00147G10	-3.69522	-0.784871
AA00146	G11	AA00146G11	-2.7713	-0.434969
AA00147	G11	AA00147G11	-3.0236	-0.560163
AA00148	G02	AA00148G02	-0.550351	-0.46065
AA00149	G02	AA00149G02	-0.717367	1.10267
AA00148	G03	AA00148G03	0.199441	-0.383608
AA00149	G03	AA00149G03	-2.30934	0.216682
AA00148	G04	AA00148G04	-0.930578	-0.284094
AA00149	G04	AA00149G04	-1.8083	-0.810552
AA00148	G05	AA00148G05	-2.16365	-0.791291
AA00149	G05	AA00149G05	-1.98242	-0.881174
AA00148	G06	AA00148G06	-3.19772	-0.903645
AA00149	G06	AA00149G06	-2.94187	-0.107538
AA00148	G07	AA00148G07	-0.0564121	-0.415709
AA00149	G07	AA00149G07	-1.08693	-0.727089
AA00148	G08	AA00148G08	-2.64337	0.107538
AA00149	G08	AA00149G08	-3.14087	-0.361137
AA00148	G09	AA00148G09	-2.77841	-0.274464
AA00149	G09	AA00149G09	-1.51336	-0.306565
AA00148	G10	AA00148G10	-3.1231	-0.788081
AA00149	G10	AA00149G10	-1.95044	-0.675727
AA00148	G11	AA00148G11	-1.22552	-0.550533
AA00149	G11	AA00149G11	-2.70734	-0.284094
AA00146	H02	AA00146H02	0.11771	0.492751
AA00147	H02	AA00147H02	-0.511262	0.961427
AA00146	H03	AA00146H03	0.68272	0.653257
AA00147	H03	AA00147H03	-1.21486	0.229522
AA00146	H04	AA00146H04	0.252744	-0.104328
AA00147	H04	AA00147H04	-0.980327	-0.550533
AA00146	H05	AA00146H05	-0.0670727	0.232733
AA00147	H05	AA00147H05	-0.546798	0.842653
AA00146	H06	AA00146H06	-0.994541	-0.258414
AA00147	H06	AA00147H06	-2.23472	-0.130009
AA00146	H07	AA00146H07	-1.93267	0.903645
AA00147	H07	AA00147H07	-1.33923	-0.544113
AA00146	H08	AA00146H08	-0.624975	0.239153
AA00147	H08	AA00147H08	-2.20629	-0.226312
AA00146	H09	AA00146H09	-1.62707	0.0401263
AA00147	H09	AA00147H09	-1.58442	-0.871544
AA00146	H10	AA00146H10	-2.11035	-0.0786476
AA00147	H10	AA00147H10	-1.52046	-1.15082
AA00146	H11	AA00146H11	-1.46361	0.354717
AA00147	H11	AA00147H11	-1.31791	0.492751
AA00148	H02	AA00148H02	0.362903	0.117169
AA00149	H02	AA00149H02	1.18377	0.996738
AA00148	H03	AA00148H03	-0.596547	0.836233
AA00149	H03	AA00149H03	-1.58798	0.900435
AA00148	H04	AA00148H04	0.817753	0.422129
AA00149	H04	AA00149H04	-1.82962	0.746349
AA00148	H05	AA00148H05	-0.46862	0.274464
AA00149	H05	AA00149H05	0.3096	0.621155
AA00148	H06	AA00148H06	-0.33714	-0.0625971
AA00149	H06	AA00149H06	-0.717367	1.10267
AA00148	H07	AA00148H07	-0.891489	-0.235943
AA00149	H07	AA00149H07	-0.035091	-0.364347
AA00148	H08	AA00148H08	0.782218	0.287304
AA00149	H08	AA00149H08	0.50149	-0.75277
AA00148	H09	AA00148H09	-0.123929	-0.245573
AA00149	H09	AA00149H09	-1.39254	0.210262
AA00148	H10	AA00148H10	-0.39755	0.0561768
AA00149	H10	AA00149H10	-1.12957	0.219892
AA00148	H11	AA00148H11	-0.237642	1.06415
AA00149	H11	AA00149H11	-1.84383	0.16853
AA00150	A02	AA00150A02	0.807355	0.245266
AA00151	A02	AA00151A02	0.610275	0.593309
AA00150	A03	AA00150A03	-0.912613	-0.0293362
AA00151	A03	AA00151A03	-0.0956284	1.41073
AA00150	A04	AA00150A04	0.463361	0.258039
AA00151	A04	AA00151A04	-0.37154	1.46501
AA00150	A05	AA00150A05	1.00443	1.4714
AA00151	A05	AA00151A05	-0.608035	1.1936
AA00150	A06	AA00150A06	0.327197	0.558185
AA00151	A06	AA00151A06	-1.20286	1.64382
AA00150	A07	AA00150A07	-1.24944	1.64063
AA00151	A07	AA00151A07	-1.02369	-0.444433
AA00150	A08	AA00150A08	1.25885	0.695487
AA00151	A08	AA00151A08	-1.25661	-0.0612667
AA00150	A09	AA00150A09	-0.683284	0.111158
AA00151	A09	AA00151A09	1.21226	1.34048
AA00150	A10	AA00150A10	1.50968	0.96051
AA00151	A10	AA00151A10	0.595942	1.61189
AA00150	A11	AA00150A11	-0.790782	0.462394
AA00151	A11	AA00151A11	1.01877	1.73323
AA00152	A02	AA00152A02	0.520693	-0.134707
AA00153	A02	AA00153A02	1.78917	-0.70307
AA00152	A03	AA00152A03	1.48101	0.625239
AA00153	A03	AA00153A03	0.280614	0.679521
AA00152	A04	AA00152A04	1.56701	0.733803
AA00153	A04	AA00153A04	-1.32469	0.970089
AA00152	A05	AA00152A05	-1.17419	0.184598
AA00153	A05	AA00153A05	-1.34977	0.23888
AA00152	A06	AA00152A06	0.148034	-0.450819
AA00153	A06	AA00153A06	-0.321374	0.692294
AA00152	A07	AA00152A07	-0.0884619	1.12336
AA00153	A07	AA00153A07	-1.13119	0.558185
AA00152	A08	AA00152A08	0.169533	0.81363
AA00153	A08	AA00153A08	0.0512855	-0.208147
AA00152	A09	AA00152A09	-0.378707	0.369795
AA00153	A09	AA00153A09	-0.346457	0.388954
AA00152	A10	AA00152A10	2.20841	0.363409
AA00153	A10	AA00153A10	-1.61852	0.851946
AA00152	A11	AA00152A11	-0.21746	1.5161
AA00153	A11	AA00153A11	-2.58242	-0.227305
AA00150	B02	AA00150B02	-0.479038	0.0185596
AA00151	B02	AA00151B02	0.183866	-0.0453014
AA00150	B03	AA00150B03	-0.321374	-1.08304
AA00151	B03	AA00151B03	-0.314208	0.31232
AA00150	B04	AA00150B04	-0.615202	-0.0900042
AA00151	B04	AA00151B04	-0.647451	-0.955321
AA00150	B05	AA00150B05	-1.75826	0.653977
AA00151	B05	AA00151B05	0.323614	-0.35822
AA00150	B06	AA00150B06	-0.367957	-0.0931972
AA00151	B06	AA00151B06	-2.42117	0.663556
AA00150	B07	AA00150B07	-0.726283	0.16544
AA00151	B07	AA00151B07	-0.690451	0.519869
AA00150	B08	AA00150B08	-1.09894	0.178212
AA00151	B08	AA00151B08	-0.482621	0.756155
AA00150	B09	AA00150B09	-0.504121	-0.0421084
AA00151	B09	AA00151B09	-0.672534	0.440043
AA00150	B10	AA00150B10	-0.403789	0.270811
AA00151	B10	AA00151B10	-0.754949	-0.827599
AA00150	B11	AA00150B11	-0.38229	-0.0069848
AA00151	B11	AA00151B11	-0.246126	0.0472971
AA00152	B02	AA00152B02	0.53861	-0.121935
AA00153	B02	AA00153B02	-0.0490459	-0.667947
AA00152	B03	AA00152B03	1.954	1.42989
AA00153	B03	AA00153B03	0.309281	0.213336
AA00152	B04	AA00152B04	1.62076	0.369795
AA00153	B04	AA00153B04	1.66734	0.181405
AA00152	B05	AA00152B05	1.14776	0.328286
AA00153	B05	AA00153B05	-0.643868	-0.632823
AA00152	B06	AA00152B06	0.585192	0.044104
AA00153	B06	AA00153B06	1.35559	-0.521066
AA00152	B07	AA00152B07	0.0620353	0.184598
AA00153	B07	AA00153B07	-0.518454	0.749768
AA00152	B08	AA00152B08	-1.07744	-0.584927
AA00153	B08	AA00153B08	-0.289125	-0.849951
AA00152	B09	AA00152B09	-0.0167966	0.417691
AA00153	B09	AA00153B09	-0.0275464	0.440043
AA00152	B10	AA00152B10	0.359446	0.883877
AA00153	B10	AA00153B10	-0.0167966	-0.25285
AA00152	B11	AA00152B11	-1.15627	0.839174
AA00153	B11	AA00153B11	-0.776449	0.491131
AA00150	C02	AA00150C02	-10.8024	-4.31122
AA00151	C02	AA00151C02	-2.14526	0.433656
AA00150	C03	AA00150C03	-2.99807	-0.760545
AA00151	C03	AA00151C03	-0.640285	-0.192182
AA00150	C04	AA00150C04	-3.16649	-0.428468
AA00151	C04	AA00151C04	-0.916196	0.609274
AA00150	C05	AA00150C05	-1.39635	0.197371
AA00151	C05	AA00151C05	-1.7081	0.736996
AA00150	C06	AA00150C06	-0.600869	1.06269
AA00151	C06	AA00151C06	0.997268	1.35006
AA00150	C07	AA00150C07	-1.45369	0.689101
AA00151	C07	AA00151C07	0.0405357	0.152668
AA00150	C08	AA00150C08	-1.03086	-0.102776
AA00151	C08	AA00151C08	-1.84068	0.51029
AA00150	C09	AA00150C09	0.599525	0.155861
AA00151	C09	AA00151C09	-0.952029	-0.303939
AA00150	C10	AA00150C10	-1.33186	0.516676
AA00151	C10	AA00151C10	-0.844531	1.08504
AA00150	C11	AA00150C11	-1.34261	0.663556
AA00151	C11	AA00151C11	-1.48235	0.0568762
AA00152	C02	AA00152C02	-0.432455	0.433656
AA00153	C02	AA00153C02	1.32334	1.23511
AA00152	C03	AA00152C03	1.91458	0.452815
AA00153	C03	AA00153C03	-0.113545	0.0664554
AA00152	C04	AA00152C04	1.15851	0.216529
AA00153	C04	AA00153C04	0.524277	0.462394
AA00152	C05	AA00152C05	-1.23152	-0.827599
AA00153	C05	AA00153C05	1.26243	0.449622
AA00152	C06	AA00152C06	0.563693	0.331479
AA00153	C06	AA00153C06	0.0907014	0.532641
AA00152	C07	AA00152C07	-0.20671	0.334672
AA00153	C07	AA00153C07	-0.160127	1.4235
AA00152	C08	AA00152C08	-0.751366	0.114351
AA00153	C08	AA00153C08	-1.79768	0.77212
AA00152	C09	AA00152C09	-0.19596	0.77212
AA00153	C09	AA00153C09	0.803771	0.117544
AA00152	C10	AA00152C10	0.377363	0.39534
AA00153	C10	AA00153C10	-0.844531	1.62147
AA00152	C11	AA00152C11	-0.916196	1.45863
AA00153	C11	AA00153C11	-0.410956	0.979668
AA00150	D02	AA00150D02	-1.88726	-0.0644597
AA00151	D02	AA00151D02	-1.56477	0.299548
AA00150	D03	AA00150D03	-1.08819	-0.696684
AA00151	D03	AA00151D03	-1.8371	0.162247
AA00150	D04	AA00150D04	-0.0562125	0.711452
AA00151	D04	AA00151D04	1.07968	0.114351
AA00150	D05	AA00150D05	-1.52893	0.267618
AA00151	D05	AA00151D05	0.348697	0.382568
AA00150	D06	AA00150D06	-0.690451	0.357023
AA00151	D06	AA00151D06	-0.500537	0.947738
AA00150	D07	AA00150D07	-1.52893	0.0696484
AA00151	D07	AA00151D07	-1.15986	1.75558
AA00150	D08	AA00150D08	-0.199543	-0.613665
AA00151	D08	AA00151D08	-1.32469	-0.607279
AA00150	D09	AA00150D09	0.542193	0.401726
AA00151	D09	AA00151D09	-0.636702	0.919
AA00150	D10	AA00150D10	0.427528	1.14251
AA00151	D10	AA00151D10	-1.11686	0.117544
AA00150	D11	AA00150D11	-2.00193	1.48417
AA00151	D11	AA00151D11	-1.37127	0.382568
AA00152	D02	AA00152D02	0.148034	1.17125
AA00153	D02	AA00153D02	1.71392	0.242073
AA00152	D03	AA00152D03	0.488444	1.101
AA00153	D03	AA00153D03	3.16873	0.117544
AA00152	D04	AA00152D04	-0.468288	0.341058
AA00153	D04	AA00153D04	1.0331	1.12974
AA00152	D05	AA00152D05	0.936352	0.679521
AA00153	D05	AA00153D05	0.746439	0.794471
AA00152	D06	AA00152D06	-0.697617	0.986054
AA00153	D06	AA00153D06	-0.496954	0.762541
AA00152	D07	AA00152D07	-1.02369	0.254846
AA00153	D07	AA00153D07	-0.446788	0.0664554
AA00152	D08	AA00152D08	-0.500537	1.59593
AA00153	D08	AA00153D08	-0.772866	-0.00379175
AA00152	D09	AA00152D09	-1.55402	0.0983859
AA00153	D09	AA00153D09	-1.3211	0.606081
AA00152	D10	AA00152D10	0.0656186	-0.214533
AA00153	D10	AA00153D10	-1.46802	-0.0229501
AA00152	D11	AA00152D11	-0.53637	0.494324
AA00153	D11	AA00153D11	-0.794365	-1.03195
AA00150	E02	AA00150E02	-0.790782	-0.527452
AA00151	E02	AA00151E02	-0.776449	0.631626
AA00150	E03	AA00150E03	-0.783616	-1.02876
AA00151	E03	AA00151E03	-0.357207	1.71088
AA00150	E04	AA00150E04	-0.840948	0.701873
AA00151	E04	AA00151E04	-1.07744	0.0728415
AA00150	E05	AA00150E05	-1.16344	0.31232
AA00151	E05	AA00151E05	-2.28142	-0.386958
AA00150	E06	AA00150E06	-1.90159	-0.109162
AA00151	E06	AA00151E06	-1.19927	0.181405
AA00150	E07	AA00150E07	-1.60418	-0.355027
AA00151	E07	AA00151E07	-0.310624	0.50071
AA00150	E08	AA00150E08	-0.830198	0.430463
AA00151	E08	AA00151E08	-2.82249	0.963703
AA00150	E09	AA00150E09	-1.54685	0.612467
AA00151	E09	AA00151E09	-1.36052	-0.0389153
AA00150	E10	AA00150E10	-0.894697	-0.444433
AA00151	E10	AA00151E10	-1.70093	0.574151
AA00150	E11	AA00150E11	-2.39967	-0.728615
AA00151	E11	AA00151E11	-0.353624	0.219722
AA00152	E02	AA00152E02	-0.407373	-0.105969
AA00153	E02	AA00153E02	0.474111	0.372988
AA00152	E03	AA00152E03	0.836021	0.982861
AA00153	E03	AA00153E03	1.0761	-0.268815
AA00152	E04	AA00152E04	-1.07028	0.529448
AA00153	E04	AA00153E04	-0.102795	-0.195375
AA00152	E05	AA00152E05	-0.980695	-0.153865
AA00153	E05	AA00153E05	-1.05236	0.226108
AA00152	E06	AA00152E06	0.0727851	0.289969
AA00153	E06	AA00153E06	0.32003	-0.533838
AA00152	E07	AA00152E07	0.273448	-0.32629
AA00153	E07	AA00153E07	-0.923363	0.641205
AA00152	E08	AA00152E08	-0.826615	0.226108
AA00153	E08	AA00153E08	-0.21746	0.203757
AA00152	E09	AA00152E09	-1.08461	0.388954
AA00153	E09	AA00153E09	0.101451	0.788085
AA00152	E10	AA00152E10	-0.00604676	0.503903
AA00153	E10	AA00153E10	-0.708367	-0.1379
AA00152	E11	AA00152E11	-1.74393	0.12393
AA00153	E11	AA00153E11	-1.6221	0.267618
AA00150	F02	AA00150F02	-0.170877	0.973282
AA00151	F02	AA00151F02	-0.188793	0.200564
AA00150	F03	AA00150F03	0.115784	0.797664
AA00151	F03	AA00151F03	-0.690451	-0.667947
AA00150	F04	AA00150F04	0.524277	-0.268815
AA00151	F04	AA00151F04	-0.554287	0.631626
AA00150	F05	AA00150F05	-0.697617	1.17764
AA00151	F05	AA00151F05	0.621025	0.417691
AA00150	F06	AA00150F06	-2.36025	0.044104
AA00151	F06	AA00151F06	-0.138628	0.842367
AA00150	F07	AA00150F07	-1.44652	0.305934
AA00151	F07	AA00151F07	-1.26377	0.966896
AA00150	F08	AA00150F08	-1.25302	0.23888
AA00151	F08	AA00151F08	-0.511287	1.06588
AA00150	F09	AA00150F09	-0.238959	0.315513
AA00151	F09	AA00151F09	-0.740616	0.928579
AA00150	F10	AA00150F10	-1.96609	0.42727
AA00151	F10	AA00151F10	2.04717	1.53207
AA00150	F11	AA00150F11	-2.62541	0.995633
AA00151	F11	AA00151F11	-2.23842	-0.380572
AA00152	F02	AA00152F02	0.456195	0.599695
AA00153	F02	AA00153F02	1.51684	0.392147
AA00152	F03	AA00152F03	1.11193	1.19999
AA00153	F03	AA00153F03	0.345113	0.040911
AA00152	F04	AA00152F04	-1.76543	-0.434854
AA00153	F04	AA00153F04	-1.32469	0.570958
AA00152	F05	AA00152F05	-0.514871	-0.0484945
AA00153	F05	AA00153F05	-0.977112	0.203757
AA00152	F06	AA00152F06	0.653274	0.28039
AA00153	F06	AA00153F06	-0.35004	0.274004
AA00152	F07	AA00152F07	-0.446788	0.344251
AA00153	F07	AA00153F07	-0.565036	0.532641
AA00152	F08	AA00152F08	0.230449	-0.0389153
AA00153	F08	AA00153F08	-1.11686	0.609274
AA00152	F09	AA00152F09	-0.414539	-1.06388
AA00153	F09	AA00153F09	-0.926946	0.20695
AA00152	F10	AA00152F10	-1.19569	0.673135
AA00153	F10	AA00153F10	-1.70452	0.867911
AA00152	F11	AA00152F11	-0.704784	0.398533
AA00153	F11	AA00153F11	0.097868	0.366602
AA00150	G02	AA00150G02	-2.67558	-0.521066
AA00151	G02	AA00151G02	-0.869614	1.72684
AA00150	G03	AA00150G03	-3.25607	-0.802055
AA00151	G03	AA00151G03	-1.94459	-0.543417
AA00150	G04	AA00150G04	-1.76901	-1.21715
AA00151	G04	AA00151G04	-0.740616	0.366602
AA00150	G05	AA00150G05	-2.61825	-0.910618
AA00151	G05	AA00151G05	-1.72243	-0.897846
AA00150	G06	AA00150G06	-2.328	-0.961707
AA00151	G06	AA00151G06	-2.04851	-0.505101
AA00150	G07	AA00150G07	-3.58573	-0.897846
AA00151	G07	AA00151G07	-1.31394	-0.294359
AA00150	G08	AA00150G08	-2.16676	-0.687105
AA00151	G08	AA00151G08	-1.74393	-0.313518
AA00150	G09	AA00150G09	-2.04134	-0.572155
AA00151	G09	AA00151G09	-1.5146	-0.080425
AA00150	G10	AA00150G10	-1.61852	-1.4694
AA00151	G10	AA00151G10	-3.19874	-0.584927
AA00150	G11	AA00150G11	-3.66814	-0.019757
AA00151	G11	AA00151G11	4.5662	-0.390151
AA00152	G02	AA00152G02	-0.446788	-0.47317
AA00153	G02	AA00153G02	-0.794365	-0.546611
AA00152	G03	AA00152G03	-1.09178	-0.0644597
AA00153	G03	AA00153G03	-0.769282	0.861525
AA00152	G04	AA00152G04	-1.91951	-0.862723
AA00153	G04	AA00153G04	-0.661784	0.258039
AA00152	G05	AA00152G05	-1.69735	0.107965
AA00153	G05	AA00153G05	-1.80126	0.727417
AA00152	G06	AA00152G06	-1.4716	-0.112355
AA00153	G06	AA00153G06	-1.34977	0.171826
AA00152	G07	AA00152G07	-0.238959	0.922193
AA00153	G07	AA00153G07	-1.4286	-0.798862
AA00152	G08	AA00152G08	-1.19569	0.357023
AA00153	G08	AA00153G08	-1.8156	0.752962
AA00152	G09	AA00152G09	-1.58985	-0.150672
AA00153	G09	AA00153G09	-2.14884	-0.655174
AA00152	G10	AA00152G10	-2.66841	-0.0133709
AA00153	G10	AA00153G10	-1.25302	0.446429
AA00152	G11	AA00152G11	-2.53942	-0.236884
AA00153	G11	AA00153G11	22.5148	-0.626437
AA00150	H02	AA00150H02	-1.32469	0.519869
AA00151	H02	AA00151H02	0.0405357	-0.0421084
AA00150	H03	AA00150H03	-0.615202	0.998827
AA00151	H03	AA00151H03	-0.468288	-0.307132
AA00150	H04	AA00150H04	-2.25634	0.350637
AA00151	H04	AA00151H04	-0.708367	0.0919998
AA00150	H05	AA00150H05	-0.672534	0.385761
AA00151	H05	AA00151H05	-0.808698	1.00202
AA00150	H06	AA00150H06	-2.29217	0.424077
AA00151	H06	AA00151H06	-1.03444	0.143089
AA00150	H07	AA00150H07	-2.05567	0.925386
AA00151	H07	AA00151H07	-2.6075	0.242073
AA00150	H08	AA00150H08	-2.3495	0.0504901
AA00151	H08	AA00151H08	-2.20975	1.2415
AA00150	H09	AA00150H09	-1.77618	-0.651981
AA00151	H09	AA00151H09	-1.84785	0.871104
AA00150	H10	AA00150H10	-2.61108	0.382568
AA00151	H10	AA00151H10	0.975768	0.503903
AA00150	H11	AA00150H11	-1.32827	-1.19161
AA00151	H11	AA00151H11	-2.22767	0.880684
AA00152	H02	AA00152H02	-0.117128	0.653977
AA00153	H02	AA00153H02	-1.61852	0.369795
AA00152	H03	AA00152H03	-1.31752	1.16167
AA00153	H03	AA00153H03	-0.56862	0.925386
AA00152	H04	AA00152H04	-1.48952	-0.70307
AA00153	H04	AA00153H04	-0.378707	0.513483
AA00152	H05	AA00152H05	-0.851698	0.80405
AA00153	H05	AA00153H05	-1.82276	-0.0995833
AA00152	H06	AA00152H06	-0.235376	0.861525
AA00153	H06	AA00153H06	-1.42502	1.1936
AA00152	H07	AA00152H07	0.262698	1.48098
AA00153	H07	AA00153H07	-0.0454627	1.3788
AA00152	H08	AA00152H08	-2.03417	0.660363
AA00153	H08	AA00153H08	0.456195	1.29578
AA00152	H09	AA00152H09	0.0333692	0.61566
AA00153	H09	AA00153H09	-1.95176	0.638012
AA00152	H10	AA00152H10	-1.3856	1.13294
AA00153	H10	AA00153H10	-0.930529	0.251652
AA00152	H11	AA00152H11	-1.15627	0.040911
AA00153	H11	AA00153H11	-1.20644	1.00841
AA00154	A02	AA00154A02	0.500494	-0.98042
AA00155	A02	AA00155A02	0.669973	0.383363
AA00154	A03	AA00154A03	-1.39909	-2.11262
AA00155	A03	AA00155A03	-0.67527	-0.288879
AA00154	A04	AA00154A04	-1.49795	59.8237
AA00155	A04	AA00155A04	-0.594061	0.37693
AA00154	A05	AA00154A05	-0.742355	-0.887142
AA00155	A05	AA00155A05	-2.12644	-1.25704
AA00154	A06	AA00154A06	-2.02758	-0.809947
AA00155	A06	AA00155A06	-3.55289	-0.588011
AA00154	A07	AA00154A07	-1.15546	-2.11583
AA00155	A07	AA00155A07	-1.64625	-0.411105
AA00154	A08	AA00154A08	-1.83338	0.154994
AA00155	A08	AA00155A08	-2.83613	-1.18949
AA00154	A09	AA00154A09	0.083857	-1.08013
AA00155	A09	AA00155A09	-0.223325	0.936595
AA00154	A10	AA00154A10	-1.02835	0.659979
AA00155	A10	AA00155A10	-0.442236	-0.459352
AA00154	A11	AA00154A11	-1.15193	0.228972
AA00155	A11	AA00155A11	-2.34535	1.09099
AA00156	A02	AA00156A02	2.05406	-0.356425
AA00157	A02	AA00157A02	0.0379563	-0.266364
AA00156	A03	AA00156A03	-0.551691	0.187158
AA00157	A03	AA00157A03	0.115634	0.0488501
AA00156	A04	AA00156A04	0.705282	-0.552629
AA00157	A04	AA00157A04	0.468717	-0.851761
AA00156	A05	AA00156A05	-0.781194	-0.983636
AA00157	A05	AA00157A05	0.045018	0.135695
AA00156	A06	AA00156A06	-1.51914	-0.0605098
AA00157	A06	AA00157A06	-1.90753	0.328683
AA00156	A07	AA00156A07	-0.37515	-0.523681
AA00157	A07	AA00157A07	-1.63212	0.733958
AA00156	A08	AA00156A08	0.143881	-1.27312
AA00157	A08	AA00157A08	-0.583468	-0.626608
AA00156	A09	AA00156A09	-1.94637	-0.890359
AA00157	A09	AA00157A09	0.581703	-0.128056
AA00156	A10	AA00156A10	0.246275	0.643897
AA00157	A10	AA00157A10	-0.985982	1.32579
AA00156	A11	AA00156A11	-2.18646	0.0327678
AA00157	A11	AA00157A11	17.9039	18.8845
AA00154	B02	AA00154B02	-2.89263	-0.559062
AA00155	B02	AA00155B02	-0.474013	0.949461
AA00154	B03	AA00154B03	-1.06366	-1.92284
AA00155	B03	AA00155B03	-1.50854	-0.591227
AA00154	B04	AA00154B04	-1.17312	-0.703804
AA00155	B04	AA00155B04	-0.103277	0.248271
AA00154	B05	AA00154B05	0.556987	1.37082
AA00155	B05	AA00155B05	-1.96049	-1.52079
AA00154	B06	AA00154B06	-1.45558	-0.600877
AA00155	B06	AA00155B06	-1.5721	-1.1123
AA00154	B07	AA00154B07	-1.64978	-0.742401
AA00155	B07	AA00155B07	-0.608184	-0.430404
AA00154	B08	AA00154B08	-2.4195	-1.11873
AA00155	B08	AA00155B08	-0.947143	-0.481867
AA00154	B09	AA00154B09	-0.781194	0.280436
AA00155	B09	AA00155B09	-1.56504	-0.710236
AA00154	B10	AA00154B10	-1.18724	-1.33423
AA00155	B10	AA00155B10	-1.44499	0.177509
AA00154	B11	AA00154B11	-3.0162	0.280436
AA00155	B11	AA00155B11	-2.5113	-0.678072
AA00156	B02	AA00156B02	-0.488136	-0.700587
AA00157	B02	AA00157B02	1.44675	0.274003
AA00156	B03	AA00156B03	0.369854	-0.22455
AA00157	B03	AA00157B03	0.415754	-0.961121
AA00156	B04	AA00156B04	-0.957735	1.43193
AA00157	B04	AA00157B04	-1.08131	-0.562279
AA00156	B05	AA00156B05	0.281583	0.701793
AA00157	B05	AA00157B05	-2.38772	-0.430404
AA00156	B06	AA00156B06	0.461655	-0.607309
AA00157	B06	AA00157B06	-2.21471	-1.18949
AA00156	B07	AA00156B07	0.0873878	-0.0251287
AA00157	B07	AA00157B07	-0.657616	-1.25704
AA00156	B08	AA00156B08	-1.73805	-1.0544
AA00157	B08	AA00157B08	-2.69137	-0.896792
AA00156	B09	AA00156B09	-1.27551	-0.842112
AA00157	B09	AA00157B09	-1.41674	0.701793
AA00156	B10	AA00156B10	-1.17312	-0.0122628
AA00157	B10	AA00157B10	-1.35319	-1.24739
AA00156	B11	AA00156B11	-0.869465	-0.166653
AA00157	B11	AA00157B11	-0.498729	-0.674855
AA00154	C02	AA00154C02	-3.64469	-1.71056
AA00155	C02	AA00155C02	-2.15115	0.0810148
AA00154	C03	AA00154C03	-2.02758	-1.59476
AA00155	C03	AA00155C03	-1.78042	-1.72664
AA00154	C04	AA00154C04	-2.78317	-0.430404
AA00155	C04	AA00155C04	-2.70549	-0.362858
AA00154	C05	AA00154C05	-1.35319	-0.780999
AA00155	C05	AA00155C05	-2.86438	-0.427187
AA00154	C06	AA00154C06	-1.82279	-0.314611
AA00155	C06	AA00155C06	-1.78748	0.975193
AA00154	C07	AA00154C07	-1.81219	-1.27633
AA00155	C07	AA00155C07	-1.53679	-0.758483
AA00154	C08	AA00154C08	-2.16175	-0.900008
AA00155	C08	AA00155C08	-2.87144	-0.945039
AA00154	C09	AA00154C09	-1.07425	0.881915
AA00155	C09	AA00155C09	-1.86516	-0.250281
AA00154	C10	AA00154C10	-2.70549	-0.124839
AA00155	C10	AA00155C10	-3.0621	-0.0540769
AA00154	C11	AA00154C11	1.16429	0.399445
AA00155	C11	AA00155C11	-1.14487	0.746824
AA00156	C02	AA00156C02	0.0767954	-0.864627
AA00157	C02	AA00157C02	-0.93302	1.08455
AA00156	C03	AA00156C03	-0.650554	0.183942
AA00157	C03	AA00157C03	-1.59681	0.347982
AA00156	C04	AA00156C04	-0.403396	0.274003
AA00157	C04	AA00157C04	-1.81573	1.79539
AA00156	C05	AA00156C05	-0.301003	-0.0862416
AA00157	C05	AA00157C05	-0.918896	0.293302
AA00156	C06	AA00156C06	-2.06288	0.656763
AA00157	C06	AA00157C06	-1.19783	1.05239
AA00156	C07	AA00156C07	-0.615246	-0.0444275
AA00157	C07	AA00157C07	-0.180955	-0.166653
AA00156	C08	AA00156C08	0.302768	-0.485084
AA00157	C08	AA00157C08	-1.14487	1.18748
AA00156	C09	AA00156C09	-2.53601	0.820802
AA00157	C09	AA00157C09	-0.774133	0.949461
AA00156	C10	AA00156C10	-1.39203	-0.218117
AA00157	C10	AA00157C10	-1.53679	0.0970971
AA00156	C11	AA00156C11	-1.58622	0.370497
AA00157	C11	AA00157C11	-0.989513	-0.176303
AA00154	D02	AA00154D02	-1.9393	-1.31172
AA00155	D02	AA00155D02	-2.12291	-0.674855
AA00154	D03	AA00154D03	-1.76629	0.0810148
AA00155	D03	AA00155D03	-1.98521	-0.391806
AA00154	D04	AA00154D04	-0.622307	-1.21844
AA00155	D04	AA00155D04	-2.1794	-0.295312
AA00154	D05	AA00154D05	-3.19981	0.791854
AA00155	D05	AA00155D05	-1.97108	-0.800297
AA00154	D06	AA00154D06	-0.908304	0.315817
AA00155	D06	AA00155D06	-1.55798	-0.0508604
AA00154	D07	AA00154D07	-0.643492	-1.1123
AA00155	D07	AA00155D07	-1.14134	-1.53365
AA00154	D08	AA00154D08	-0.812972	1.81147
AA00155	D08	AA00155D08	-1.04601	-0.469001
AA00154	D09	AA00154D09	-1.08131	0.37693
AA00155	D09	AA00155D09	-1.24726	0.849751
AA00154	D10	AA00154D10	-1.36025	0.164643
AA00155	D10	AA00155D10	-0.940081	0.0231184
AA00154	D11	AA00154D11	-0.929489	-0.903224
AA00155	D11	AA00155D11	0.828861	0.251488
AA00156	D02	AA00156D02	0.278052	-0.00582985
AA00157	D02	AA00157D02	1.49619	1.4255
AA00156	D03	AA00156D03	-0.07503	1.14567
AA00157	D03	AA00157D03	0.0132406	0.11318
AA00156	D04	AA00156D04	1.16429	0.0745819
AA00157	D04	AA00157D04	0.359261	0.894781
AA00156	D05	AA00156D05	-1.26139	0.116396
AA00157	D05	AA00157D05	-0.385742	1.45445
AA00156	D06	AA00156D06	0.143881	0.582784
AA00157	D06	AA00157D06	-0.858873	0.47664
AA00156	D07	AA00156D07	-1.47677	-0.256714
AA00157	D07	AA00157D07	-0.0820916	0.569918
AA00156	D08	AA00156D08	-1.87575	0.54097
AA00157	D08	AA00157D08	-1.31082	0.962327
AA00156	D09	AA00156D09	-2.02051	-0.0540769
AA00157	D09	AA00157D09	-0.424581	-0.504382
AA00156	D10	AA00156D10	-1.39909	-0.0926745
AA00157	D10	AA00157D10	-1.33906	-0.59766
AA00156	D11	AA00156D11	-2.58544	-0.111973
AA00157	D11	AA00157D11	-1.79454	0.727525
AA00154	E02	AA00154E02	-0.985982	-0.43362
AA00155	E02	AA00155E02	-0.876527	0.360847
AA00154	E03	AA00154E03	-0.989513	-0.555846
AA00155	E03	AA00155E03	-1.46617	-0.237416
AA00154	E04	AA00154E04	-0.858873	-1.90998
AA00155	E04	AA00155E04	-2.13703	-0.111973
AA00154	E05	AA00154E05	-2.76552	0.0359842
AA00155	E05	AA00155E05	-1.92165	-0.317827
AA00154	E06	AA00154E06	-1.39556	-0.973987
AA00155	E06	AA00155E06	-2.4654	-0.793865
AA00154	E07	AA00154E07	-1.32847	-1.0351
AA00155	E07	AA00155E07	-2.29239	-0.700587
AA00154	E08	AA00154E08	-2.39125	-0.382157
AA00155	E08	AA00155E08	-1.85103	0.161427
AA00154	E09	AA00154E09	-0.707047	0.0295513
AA00155	E09	AA00155E09	-1.72039	0.251488
AA00154	E10	AA00154E10	-1.618	-0.472218
AA00155	E10	AA00155E10	-0.985982	0.827236
AA00154	E11	AA00154E11	-0.657616	0.801504
AA00155	E11	AA00155E11	-0.869465	-0.259931
AA00156	E02	AA00156E02	-0.124462	-1.15089
AA00157	E02	AA00157E02	0.083857	-0.349992
AA00156	E03	AA00156E03	0.394569	-0.671639
AA00157	E03	AA00157E03	-0.876527	0.013469
AA00156	E04	AA00156E04	-0.964797	0.75004
AA00157	E04	AA00157E04	0.0520796	-0.0765921
AA00156	E05	AA00156E05	-1.30376	-0.571928
AA00157	E05	AA00157E05	-0.639961	0.00381956
AA00156	E06	AA00156E06	-1.55091	-0.150571
AA00157	E06	AA00157E06	-2.10878	-0.163437
AA00156	E07	AA00156E07	-0.784725	-0.700587
AA00157	E07	AA00157E07	-0.707047	-0.00904632
AA00156	E08	AA00156E08	-1.0566	-0.501166
AA00157	E08	AA00157E08	-1.24373	-0.179519
AA00156	E09	AA00156E09	-0.830626	-0.33391
AA00157	E09	AA00157E09	-0.791787	-0.317827
AA00156	E10	AA00156E10	-0.841218	-0.375724
AA00157	E10	AA00157E10	0.0944495	-0.990069
AA00156	E11	AA00156E11	-0.530506	-0.198818
AA00157	E11	AA00157E11	-0.781194	-0.459352
AA00154	F02	AA00154F02	-0.971859	-0.0251287
AA00155	F02	AA00155F02	-1.91106	-0.137705
AA00154	F03	AA00154F03	-2.06288	-0.163437
AA00155	F03	AA00155F03	-3.29161	-0.356425
AA00154	F04	AA00154F04	-0.509321	0.69536
AA00155	F04	AA00155F04	-1.36378	0.460558
AA00154	F05	AA00154F05	-0.636431	-0.128056
AA00155	F05	AA00155F05	-2.02404	-0.497949
AA00154	F06	AA00154F06	-1.37084	1.11993
AA00155	F06	AA00155F06	-0.752948	-0.826029
AA00154	F07	AA00154F07	-0.749417	-0.530114
AA00155	F07	AA00155F07	-2.53248	0.762906
AA00154	F08	AA00154F08	-0.583468	-0.356425
AA00155	F08	AA00155F08	-1.85456	0.277219
AA00154	F09	AA00154F09	-2.26414	0.428393
AA00155	F09	AA00155F09	-1.31788	0.611732
AA00154	F10	AA00154F10	-1.47324	0.875483
AA00155	F10	AA00155F10	-1.63212	0.576351
AA00154	F11	AA00154F11	-1.71686	0.209674
AA00155	F11	AA00155F11	-1.99933	-0.771349
AA00156	F02	AA00156F02	0.345138	0.0263348
AA00157	F02	AA00157F02	0.0697337	0.489506
AA00156	F03	AA00156F03	-0.346903	0.299735
AA00157	F03	AA00157F03	-0.452828	-0.111973
AA00156	F04	AA00156F04	-1.96049	0.795071
AA00157	F04	AA00157F04	0.3981	0.820802
AA00156	F05	AA00156F05	-0.950674	0.80472
AA00157	F05	AA00157F05	-2.57132	0.00381956
AA00156	F06	AA00156F06	-0.523444	-0.253498
AA00157	F06	AA00157F06	-0.650554	0.505589
AA00156	F07	AA00156F07	-0.699986	-0.0830251
AA00157	F07	AA00157F07	-2.00286	-0.961121
AA00156	F08	AA00156F08	-1.12722	0.0584995
AA00157	F08	AA00157F08	-1.09897	0.200024
AA00156	F09	AA00156F09	-0.103277	0.711443
AA00157	F09	AA00157F09	-1.60034	-0.266364
AA00156	F10	AA00156F10	-3.04445	0.409095
AA00157	F10	AA00157F10	-2.17234	1.00414
AA00156	F11	AA00156F11	-0.855342	0.206457
AA00157	F11	AA00157F11	-1.15899	-0.594444
AA00154	G02	AA00154G02	-1.0566	-1.12516
AA00155	G02	AA00155G02	-2.71255	-0.0476439
AA00154	G03	AA00154G03	-3.64822	-1.47254
AA00155	G03	AA00155G03	-2.47599	-0.298528
AA00154	G04	AA00154G04	-3.78945	-0.420754
AA00155	G04	AA00155G04	-2.9703	0.502372
AA00154	G05	AA00154G05	-2.63841	-0.0347781
AA00155	G05	AA00155G05	-1.95343	-1.49184
AA00154	G06	AA00154G06	-2.45833	-1.15733
AA00155	G06	AA00155G06	-3.73649	-0.784215
AA00154	G07	AA00154G07	-2.21824	0.0263348
AA00155	G07	AA00155G07	-2.12291	0.43161
AA00154	G08	AA00154G08	-1.84397	0.450909
AA00155	G08	AA00155G08	-3.18568	-0.507599
AA00154	G09	AA00154G09	-2.49364	-0.674855
AA00155	G09	AA00155G09	-3.19981	8.07072
AA00154	G10	AA00154G10	-2.9809	-0.822813
AA00155	G10	AA00155G10	-3.67647	-1.11873
AA00154	G11	AA00154G11	-2.50424	-0.620175
AA00155	G11	AA00155G11	-3.45756	-0.546196
AA00156	G02	AA00156G02	14.7332	12.1138
AA00157	G02	AA00157G02	0.0873878	0.54097
AA00156	G03	AA00156G03	6.00152	5.45252
AA00157	G03	AA00157G03	-1.00717	0.505589
AA00156	G04	AA00156G04	17.2013	19.2512
AA00157	G04	AA00157G04	-2.0876	-0.414321
AA00156	G05	AA00156G05	-1.35319	0.206457
AA00157	G05	AA00157G05	-1.33553	-0.739185
AA00156	G06	AA00156G06	0.00264812	-0.497949
AA00157	G06	AA00157G06	-1.20842	0.364064
AA00156	G07	AA00156G07	-1.88281	-0.00261338
AA00157	G07	AA00157G07	-1.16605	0.688927
AA00156	G08	AA00156G08	-3.16097	-0.38859
AA00157	G08	AA00157G08	-0.968328	0.26757
AA00156	G09	AA00156G09	0.564049	2.2264
AA00157	G09	AA00157G09	-1.77336	-0.613742
AA00156	G10	AA00156G10	-2.11938	-0.176303
AA00157	G10	AA00157G10	-3.35163	0.598866
AA00156	G11	AA00156G11	-1.45205	0.203241
AA00157	G11	AA00157G11	-1.31788	0.0842313
AA00154	H02	AA00154H02	-1.43793	0.8594
AA00155	H02	AA00155H02	-0.399866	0.222539
AA00154	H03	AA00154H03	-0.41752	0.669628
AA00155	H03	AA00155H03	-1.62153	0.936595
AA00154	H04	AA00154H04	-1.06719	0.949461
AA00155	H04	AA00155H04	-2.49717	2.03984
AA00154	H05	AA00154H05	-0.530506	1.55416
AA00155	H05	AA00155H05	-1.97814	1.30006
AA00154	H06	AA00154H06	-0.368088	0.357631
AA00155	H06	AA00155H06	-0.364557	-0.221333
AA00154	H07	AA00154H07	-2.00992	-0.92574
AA00155	H07	AA00155H07	-2.31357	-0.668422
AA00154	H08	AA00154H08	-0.820033	0.0681489
AA00155	H08	AA00155H08	-1.76276	0.399445
AA00154	H09	AA00154H09	-0.311595	0.0874477
AA00155	H09	AA00155H09	-2.42303	0.537753
AA00154	H10	AA00154H10	-0.1174	0.0842313
AA00155	H10	AA00155H10	-1.88634	0.582784
AA00154	H11	AA00154H11	1.86339	0.434826
AA00155	H11	AA00155H11	-2.1794	0.653546
AA00156	H02	AA00156H02	-0.791787	0.598866
AA00157	H02	AA00157H02	0.186251	0.994492
AA00156	H03	AA00156H03	0.0485488	0.69536
AA00157	H03	AA00157H03	1.11133	1.65065
AA00156	H04	AA00156H04	0.857107	0.463774
AA00157	H04	AA00157H04	0.821799	0.791854
AA00156	H05	AA00156H05	-0.015006	0.946245
AA00157	H05	AA00157H05	0.560518	1.06847
AA00156	H06	AA00156H06	1.761	1.44158
AA00157	H06	AA00157H06	0.288645	2.30681
AA00156	H07	AA00156H07	-0.0255985	1.36117
AA00157	H07	AA00157H07	0.539333	0.824019
AA00156	H08	AA00156H08	1.62329	3.74457
AA00157	H08	AA00157H08	1.55268	1.32257
AA00156	H09	AA00156H09	-0.406927	1.55737
AA00157	H09	AA00157H09	-0.823564	0.624598
AA00156	H10	AA00156H10	-0.269225	0.553836
AA00157	H10	AA00157H10	0.556987	1.1907
AA00156	H11	AA00156H11	0.158004	1.88224
AA00157	H11	AA00157H11	-0.20567	1.51556
AA00158	A02	AA00158A02	3.32511	1.36318
AA00159	A02	AA00159A02	2.99854	-0.277575
AA00158	A03	AA00158A03	3.8619	0.589
AA00159	A03	AA00159A03	4.7215	0.655905
AA00158	A04	AA00158A04	3.47526	-0.471917
AA00159	A04	AA00159A04	4.28607	0.869363
AA00158	A05	AA00158A05	4.94673	1.07008
AA00159	A05	AA00159A05	3.85064	0.238547
AA00158	A06	AA00158A06	4.17721	0.302266
AA00159	A06	AA00159A06	2.92346	-0.0195139
AA00158	A07	AA00158A07	4.13967	0.088808
AA00159	A07	AA00159A07	5.57736	-0.491033
AA00158	A08	AA00158A08	4.10964	0.815202
AA00159	A08	AA00159A08	6.13666	-0.0226998
AA00158	A09	AA00158A09	5.58111	1.18158
AA00159	A09	AA00159A09	7.03756	0.920338
AA00158	A10	AA00158A10	5.25829	1.41734
AA00159	A10	AA00159A10	8.58035	0.104738
AA00158	A11	AA00158A11	6.58711	0.843875
AA00159	A11	AA00159A11	7.95723	0.633603
AA00160	A02	AA00160A02	3.6667	0.251291
AA00161	A02	AA00161A02	2.82586	1.14973
AA00160	A03	AA00160A03	2.79208	-0.169253
AA00161	A03	AA00161A03	4.6652	1.57983
AA00160	A04	AA00160A04	4.86039	0.853433
AA00161	A04	AA00161A04	3.74553	-0.143765
AA00160	A05	AA00160A05	3.85814	0.1812
AA00161	A05	AA00161A05	5.37841	0.550769
AA00160	A06	AA00160A06	3.99328	0.107924
AA00161	A06	AA00161A06	3.82811	0.292708
AA00160	A07	AA00160A07	5.37466	0.225803
AA00161	A07	AA00161A07	5.13066	0.859805
AA00160	A08	AA00160A08	4.33862	0.0346471
AA00161	A08	AA00161A08	3.15244	1.21663
AA00160	A09	AA00160A09	5.43847	-0.121464
AA00161	A09	AA00161A09	5.90018	0.50298
AA00160	A10	AA00160A10	7.21399	1.59894
AA00161	A10	AA00161A10	7.74702	1.16884
AA00160	A11	AA00160A11	6.39943	0.541211
AA00161	A11	AA00161A11	7.31534	0.639975
AA00158	B02	AA00158B02	-0.90911	-0.468731
AA00159	B02	AA00159B02	2.23653	0.158899
AA00158	B03	AA00158B03	2.82586	-0.0258857
AA00159	B03	AA00159B03	13.5653	8.03772
AA00158	B04	AA00158B04	2.63818	0.152527
AA00159	B04	AA00159B04	4.58262	-1.01034
AA00158	B05	AA00158B05	3.44523	0.123853
AA00159	B05	AA00159B05	3.50529	0.391472
AA00158	B06	AA00158B06	2.8071	0.506166
AA00159	B06	AA00159B06	2.66821	0.7929
AA00158	B07	AA00158B07	2.85214	0.608116
AA00159	B07	AA00159B07	4.76655	0.346869
AA00158	B08	AA00158B08	4.69147	0.429703
AA00159	B08	AA00159B08	3.69298	-0.679003
AA00158	B09	AA00158B09	6.01655	-0.510148
AA00159	B09	AA00159B09	5.44222	-0.0258857
AA00158	B10	AA00158B10	5.71625	1.26761
AA00159	B10	AA00159B10	6.41069	0.961755
AA00158	B11	AA00158B11	6.78606	1.12424
AA00159	B11	AA00159B11	4.74403	0.346869
AA00160	B02	AA00160B02	2.78833	0.0250893
AA00161	B02	AA00161B02	1.17797	-1.20787
AA00160	B03	AA00160B03	1.69974	0.0569486
AA00161	B03	AA00161B03	4.09463	-0.0736748
AA00160	B04	AA00160B04	4.37991	-0.0418154
AA00161	B04	AA00161B04	1.73352	0.206688
AA00160	B05	AA00160B05	2.35289	-0.710862
AA00161	B05	AA00161B05	3.90694	0.29908
AA00160	B06	AA00160B06	2.67196	1.17203
AA00161	B06	AA00161B06	1.76355	-0.283947
AA00160	B07	AA00160B07	2.14268	-0.672631
AA00161	B07	AA00161B07	5.47976	0.796086
AA00160	B08	AA00160B08	3.54283	0.710066
AA00161	B08	AA00161B08	2.32286	1.15928
AA00160	B09	AA00160B09	3.54283	-0.812812
AA00161	B09	AA00161B09	4.93171	0.464749
AA00160	B10	AA00160B10	5.88892	0.190758
AA00161	B10	AA00161B10	6.86489	0.974499
[truncated: 17,842 more rows]

## Sheet: Hit
Plate/Well No.	RelA	p52
B00045DG08	172.927	107.832
B00043DD06	147.713	121.825
AA00179D01	146.592	103.983
B00137DG11	136.695	107.396
AA00016H10	128.201	126.868
B00028DH03	125.028	108.157
B00135DH10	118.171	88.65
AA00012E12	115.904	126.74
B00006DF05	112.811	101.937
B00104DC04	112.437	87.8513
B00135DH12	111.371	75.3067
B00069DG08	107.727	115.024
B00136DA01	105.269	63.6615
B00129DE09	104.418	102.396
B00146DC08	101.836	73.3188
AA00013A01	99.2748	86.6534
B00143DC05	95.5267	81.9234
B00118DC10	94.1279	154.073
B00055DH06	92.8162	2.29353
B00029DF04	91.1726	83.4222
B00028DG02	90.6597	91.1102
B00006DE01	89.7349	31.3363
B00098DC12	89.2594	52.1359
B00045DE03	88.8985	21.3669
AA00010G04	87.4028	83.8042
AA00179C12	86.5293	61.4777
B00057DF10	86.2936	44.7701
B00102DC06	86.0272	79.267
AA00010G03	85.3803	38.6097
B00116DD12	84.5642	31.3714
B00118DC09	84.1247	41.7518
B00011DC10	83.9426	75.5088
B00118DD03	83.8889	72.5039
B00111DD10	83.4448	58.7231
B00112DC10	82.4418	63.7901
B00041DH08	82.1091	79.4661
B00036DH11	82.0305	69.3434
AA00009H12	80.712	77.7685
AA00169F09	80.563	65.7112
B00143DC04	78.3685	67.3604
AA00010C10	76.5161	78.467
B00022DE10	75.8507	75.3408
B00041DD01	73.7434	7.24834
B00143DE08	73.4214	15.9403
B00106DE01	71.1284	44.3037
B00043DE07	71.1062	91.6153
AA00009H07	70.5213	75.0834
B00137DG06	69.0095	59.1001
AA00174H05	68.0095	61.1494
B00025DF01	67.8514	-0.981846
B00135DH11	66.901	58.2113
B00062DE08	66.37	42.8732
B00135DF05	64.1792	61.0561
AA00178A02	63.8847	66.0888
B00012DA11	63.153	58.7685
B00044DA09	62.8517	66.5008
B00006DB01	62.7821	4.03246
B00115DA11	62.2422	48.6992
B00013DG04	61.6754	77.1625
AA00167C02	60.3668	-0.471557
AA00182B10	58.4705	56.8034
B00141DE12	57.8569	44.0915
AA00159C12	57.731	46.3082
B00037DC06	57.1453	-0.451116
B00044DE07	56.946	44.5446
AA00013B03	54.8479	2.82172
B00112DH08	54.6764	45.1943
B00137DG09	53.6887	46.3304
B00012DH05	53.123	48.1511
AA00010H03	52.5267	1.62832
AA00013F01	52.5126	4.36505
B00105DE08	51.631	48.07
B00038DE12	51.3088	30.3532
B00111DH12	50.9912	31.94
B00022DE11	50.1274	42.4208
B00067DF09	50.0297	42.8477
B00044DE10	48.023	44.6316
B00062DE10	47.1665	8.31031
AA00183A10	47.1529	39.9482
B00117DH01	46.8283	23.5474
AA00174F06	46.5241	45.1077
B00118DD02	45.5039	46.1446
B00104DF02	45.18	44.5722
B00138DA11	44.9302	1.37911
AA00198B04	44.5316	38.8811
B00034DE06	44.2812	36.735
AA00182B09	43.8127	37.8941
B00011DG08	41.8696	34.6294
AA00194H10	41.6993	37.3539
B00034DA02	41.4525	37.0207
AA00174G11	41.2233	32.6316
AA00176G01	40.3929	37.3961
AA00186A01	40.1495	3.1909
B00004DC02	39.2225	47.9484
B00117DG12	39.0046	20.1014
B00037DE12	38.2199	12.8807
B00001DE02	37.3547	32.768
B00121DG04	36.9943	33.8878
AA00183B01	36.1233	29.4993
AA00183A12	35.9256	32.7696
B00079DF01	35.7053	19.2153
B00141DG11	35.5075	34.0994
B00007DC10	35.1874	9.11642
AA00199G06	35.1431	41.3819
AA00016G12	34.0744	24.2105
B00056DA11	33.7728	6.12922
B00080DC04	33.5719	20.7032
B00137DG10	33.2127	30.3313
AA00174F03	31.8312	41.7587
AA00182C03	30.9687	30.0935
B00034DA08	30.808	28.9556
B00052DH01	30.7515	23.8775
B00043DD04	30.1162	33.4553
AA00183A09	30.0973	22.912
AA00182D08	30.0298	25.0106
B00020DB03	28.9227	31.9598
AA00199G05	28.3718	33.337
AA00199G07	23.1217	32.4339
AA00154A04	-1.49795	59.8237
B00003DF04	-3.60955	99.7075
