# Supplementary material for: Identification of a Selective RelA Inhibitor Based on DSE-FRET Screening Methods
Source: Int J Mol Sci. 2020 Nov 30;21(23):9150. doi: 10.3390/ijms21239150 (PMC7734590; doi:10.3390/ijms21239150)
Supplement: Supplementary file 1 [file ijms-21-09150-s001.zip › Table S1C. NF-kB_HTS_Known Drugs.xlsx]

## Sheet: QC_Date_RelA_Known Lib.
Plate ID	S/B	MLC	SDLC	CVLC	MHC	SDHC	CVHC	Z'
CM001RL110	3.47435	12025.9	517.318	4.30169	41751.3	996.747	2.38734	0.847195
CM002RL110	3.3501	12630.3	436.992	3.45987	41930.6	899.847	2.14604	0.863123
CM003RL110	3.38326	12459.2	470.935	3.77982	41576.4	799.382	1.92268	0.869117
CM004RL110	3.69016	11272.9	323.047	2.86569	41240.5	727.511	1.76407	0.89483
CM005RL110	3.48955	11851.8	498.351	4.20487	41608.1	859.722	2.06624	0.863081
CM006RL110	3.50897	11895.3	546.58	4.59492	41622.6	707.163	1.69899	0.873476
CM007RL110	3.74022	10993.8	275.633	2.50717	41133.4	757.548	1.84169	0.89716
CM008RL110	3.63611	11432.4	434.141	3.79747	41507.4	795.624	1.91683	0.87733
CM009RL110	3.69484	11407.9	454.286	3.98221	41901.6	793.907	1.8947	0.877202
CM010RL110	3.63249	11415.2	422.396	3.7003	41607.7	903.457	2.17137	0.86826
CM011RL110	3.38017	12500	484.106	3.87285	41905.8	757.981	1.80877	0.873282
CM012RL110	2.14478	19961.1	990.181	4.96056	42976.1	549.887	1.27952	0.799253
CM013RL110	2.53351	16474.3	1076.62	6.53516	41879.7	1029.36	2.4579	0.751314

## Sheet: QC_Date_p52_Known Lib.
Plate ID	S/B	MLC	SDLC	CVLC	MHC	SDHC	CVHC	Z'
CM00152110	4.53228	9192.19	390.028	4.24304	41524.6	843.988	2.0325	0.8855
CM00252110	4.45324	9456.81	235.505	2.49032	41945.6	798.828	1.90444	0.90449
CM00352110	4.39807	9576.75	223.873	2.33767	42106.9	777.939	1.84753	0.907611
CM00452110	4.32049	9758.38	293.966	3.01245	41687.9	778.125	1.86655	0.89927
CM00552110	4.19477	9986.75	384.093	3.84602	41884.3	853.655	2.03813	0.883588
CM00652110	4.2309	9880.19	252.876	2.55943	41807.8	908.911	2.17402	0.890836
CM00752110	3.72667	11262.2	406.956	3.61347	41926.4	768.699	1.83345	0.884981
CM00852110	3.80391	11077.3	309.058	2.79001	41994.3	1071.09	2.55056	0.866079
CM00952110	3.72875	11267	261.347	2.31958	41798.1	868.922	2.07885	0.888939
CM01052110	3.30415	12984.2	334.752	2.57814	42976.9	949.753	2.20991	0.871518
CM01152110	4.42378	9488.88	288.138	3.03659	41752	799.867	1.91576	0.898831
CM01252110	4.49919	9264.75	211.13	2.27885	41661.5	768.088	1.84364	0.909323
CM01352110	4.49976	9265.56	310.119	3.34701	41425.4	923.753	2.22992	0.8849

## Sheet: HTS_Results_Known Lib.
Mother plate info.						HTS Results						RelA												RelA	p52
Mother Plate No.	Well No.	Vender	Vender Compound ID	Vender Plate No.	Vender Well No.	Plate ID	Row	Column	Inhibition % @ 10 mM													-100~	-100	0	0
									RelA	p52												-100~-95	-95	0	0
20120514A1	A03	Tocris	0114	1	A02	CM001RL110	A	3	1.73947	-0.282032												-95~-85	-85	0	0
20120514A1	A04	Tocris	0691	3	A02	CM001RL110	A	4	156.883	150.591												-85~-80	-80	0	0
20120514A1	A05	Tocris	0162	1	A03	CM001RL110	A	5	1.99514	1.17471												-80~-75	-75	0	0
20120514A1	A06	Tocris	0692	3	A03	CM001RL110	A	6	1.1171	0.958211												-75~-70	-70	0	0
20120514A1	A07	Tocris	0169	1	A04	CM001RL110	A	7	-0.0603441	-0.668641												-70~-65	-65	0	0
20120514A1	A08	Tocris	0694	3	A04	CM001RL110	A	8	0.784052	0.237571												-65~-60	-60	0	0
20120514A1	A09	Tocris	0180	1	A05	CM001RL110	A	9	0.71677	-0.0407873												-60~-55	-55	0	0
20120514A1	A10	Tocris	0695	3	A05	CM001RL110	A	10	1.01618	0.540673												-55~-50	-50	1	0
20120514A1	A11	Tocris	0186	1	A06	CM001RL110	A	11	0.770596	0.327265												-50~-45	-45	0	0
20120514A1	A12	Tocris	0699	3	A06	CM001RL110	A	12	0.83115	1.06337												-45~-40	-40	0	0
20120514A1	A13	Tocris	0188	1	A07	CM001RL110	A	13	1.31559	0.797382		Avg.	0.339381									-40~-35	-35	0	0
20120514A1	A14	Tocris	0701	3	A07	CM001RL110	A	14	-2.04854	-1.9893		S.D.	9.43489									-35~-30	-30	0	0
20120514A1	A15	Tocris	0189	1	A08	CM001RL110	A	15	1.14065	0.701503		3S.D.	28.3047									-30~-25	-25	1	0
20120514A1	A16	Tocris	0702	3	A08	CM001RL110	A	16	-1.35553	1.33864		Avg.± 3S.D.	0.3 ± 28.3									-25~-20	-20	4	0
20120514A1	A17	Tocris	0197	1	A09	CM001RL110	A	17	0.444275	0.78501												-20~-15	-15	5	2
20120514A1	A18	Tocris	0703	3	A09	CM001RL110	A	18	-0.282377	0.243757		p52										-15~-10	-10	13	5
20120514A1	A19	Tocris	0216	1	A10	CM001RL110	A	19	-0.104078	0.253036												-10~-5	-5	106	33
20120514A1	A20	Tocris	0705	3	A10	CM001RL110	A	20	0.245792	1.41905												-5~0	0	2205	2665
20120514A1	A21	Tocris	0222	1	A11	CM001RL110	A	21	-1.86352	-0.427397												0~5	5	1705	1394
20120514A1	A22	Tocris	0706	3	A11	CM001RL110	A	22	-0.453947	0.942747												5~0	10	63	8
20120514A1	B03	Tocris	0495	2	A02	CM001RL110	B	3	-0.194909	0.0952992												10~15	15	9	10
20120514A1	B04	Tocris	0870	4	A02	CM001RL110	B	4	0.403906	1.04481												15~20	20	4	2
20120514A1	B05	Tocris	0496	2	A03	CM001RL110	B	5	2.03551	0.645831												20~25	25	1	1
20120514A1	B06	Tocris	0871	4	A03	CM001RL110	B	6	0.171781	0.689131												25~30	30	3	0
20120514A1	B07	Tocris	0498	2	A04	CM001RL110	B	7	1.12719	1.36956												30~35	35	1	5
20120514A1	B08	Tocris	0876	4	A04	CM001RL110	B	8	-0.998936	0.750989												35~40	40	4	3
20120514A1	B09	Tocris	0504	2	A05	CM001RL110	B	9	-5.51023	-3.81719												40~45	45	1	1
20120514A1	B10	Tocris	0877	4	A05	CM001RL110	B	10	-1.13014	-0.445954												45~50	50	1	0
20120514A1	B11	Tocris	0506	2	A06	CM001RL110	B	11	0.0674928	0.120042		Avg.	-0.102712									50~55	55	0	1
20120514A1	B12	Tocris	0878	4	A06	CM001RL110	B	12	-0.98548	2.02216		S.D.	8.76313									55~60	60	3	1
20120514A1	B13	Tocris	0507	2	A07	CM001RL110	B	13	-2.60026	-0.947		3S.D.	26.2894									60~65	65	1	2
20120514A1	B14	Tocris	0879	4	A07	CM001RL110	B	14	-1.86015	0.652017		Avg.± 3S.D.	-0.1 ± 26.3									65~70	70	1	0
20120514A1	B15	Tocris	0511	2	A08	CM001RL110	B	15	-0.0805288	0.426237												70~75	75	0	4
20120514A1	B16	Tocris	0880	4	A08	CM001RL110	B	16	-0.824001	0.466444												75~80	80	2	0
20120514A1	B17	Tocris	0512	2	A09	CM001RL110	B	17	1.33913	0.339636												80~85	85	2	1
20120514A1	B18	Tocris	0881	4	A09	CM001RL110	B	18	0.208786	0.488094												85~90	90	0	1
20120514A1	B19	Tocris	0513	2	A10	CM001RL110	B	19	0.0271233	0.123135												90~95	95	4	0
20120514A1	B20	Tocris	0882	4	A10	CM001RL110	B	20	-0.965295	1.29224												95~100	100	3	2
20120514A1	B21	Tocris	0514	2	A11	CM001RL110	B	21	-1.59775	0.324172												100~		8	10
20120514A1	B22	Tocris	0883	4	A11	CM001RL110	B	22	0.0338516	0.738617
20120514A1	C03	Tocris	0223	1	B02	CM001RL110	C	3	-0.15454	1.59225
20120514A1	C04	Tocris	0713	3	B02	CM001RL110	C	4	-0.42367	-1.05216
20120514A1	C05	Tocris	0225	1	B03	CM001RL110	C	5	0.131411	-0.937721
20120514A1	C06	Tocris	0719	3	B03	CM001RL110	C	6	1.76974	-0.217081
20120514A1	C07	Tocris	0234	1	B04	CM001RL110	C	7	0.0674928	0.72006
20120514A1	C08	Tocris	0723	3	B04	CM001RL110	C	8	-1.1806	0.747896
20120514A1	C09	Tocris	0235	1	B05	CM001RL110	C	9	-0.776904	0.0179773
20120514A1	C10	Tocris	0724	3	B05	CM001RL110	C	10	-1.55402	0.444794
20120514A1	C11	Tocris	0237	1	B06	CM001RL110	C	11	-1.69195	-0.170688
20120514A1	C12	Tocris	0725	3	B06	CM001RL110	C	12	-0.877827	-0.282032
20120514A1	C13	Tocris	0245	1	B07	CM001RL110	C	13	-0.501045	0.259222
20120514A1	C14	Tocris	0726	3	B07	CM001RL110	C	14	-2.11583	-0.0655303
20120514A1	C15	Tocris	0246	1	B08	CM001RL110	C	15	-1.06286	-0.0933662
20120514A1	C16	Tocris	0727	3	B08	CM001RL110	C	16	-1.65158	0.166435
20120514A1	C17	Tocris	0254	1	B09	CM001RL110	C	17	-1.18733	1.23348
20120514A1	C18	Tocris	0728	3	B09	CM001RL110	C	18	-2.30758	0.113856
20120514A1	C19	Tocris	0281	1	B10	CM001RL110	C	19	0.289525	0.645831
20120514A1	C20	Tocris	0729	3	B10	CM001RL110	C	20	-1.27143	0.45098
20120514A1	C21	Tocris	0282	1	B11	CM001RL110	C	21	-1.48001	1.14069
20120514A1	C22	Tocris	0730	3	B11	CM001RL110	C	22	-1.06622	0.352008
20120514A1	D03	Tocris	0515	2	B02	CM001RL110	D	3	0.390449	-0.260381
20120514A1	D04	Tocris	0884	4	B02	CM001RL110	D	4	-0.854279	0.976769
20120514A1	D05	Tocris	0518	2	B03	CM001RL110	D	5	-0.178089	0.345822
20120514A1	D06	Tocris	0885	4	B03	CM001RL110	D	6	-1.33198	-0.0129514
20120514A1	D07	Tocris	0522	2	B04	CM001RL110	D	7	-0.918197	0.679853
20120514A1	D08	Tocris	0888	4	B04	CM001RL110	D	8	0.0304874	1.19946
20120514A1	D09	Tocris	0529	2	B05	CM001RL110	D	9	0.198694	1.08811
20120514A1	D10	Tocris	0889	4	B05	CM001RL110	D	10	-0.205002	0.69841
20120514A1	D11	Tocris	0535	2	B06	CM001RL110	D	11	-0.736534	0.488094
20120514A1	D12	Tocris	0890	4	B06	CM001RL110	D	12	-2.71801	1.40049
20120514A1	D13	Tocris	0537	2	B07	CM001RL110	D	13	-0.844186	-0.0438802
20120514A1	D14	Tocris	0891	4	B07	CM001RL110	D	14	-0.420306	0.877797
20120514A1	D15	Tocris	0538	2	B08	CM001RL110	D	15	-0.57842	-0.532554
20120514A1	D16	Tocris	0892	4	B08	CM001RL110	D	16	-0.965295	-1.92744
20120514A1	D17	Tocris	0541	2	B09	CM001RL110	D	17	-1.01576	-0.201617
20120514A1	D18	Tocris	0894	4	B09	CM001RL110	D	18	1.03973	0.964397
20120514A1	D19	Tocris	0543	2	B10	CM001RL110	D	19	-1.46319	1.36028
20120514A1	D20	Tocris	0895	4	B10	CM001RL110	D	20	-2.11583	0.222107
20120514A1	D21	Tocris	0544	2	B11	CM001RL110	D	21	-3.23945	-1.49135
20120514A1	D22	Tocris	0896	4	B11	CM001RL110	D	22	-1.35217	0.172621
20120514A1	E03	Tocris	0286	1	C02	CM001RL110	E	3	-1.2647	-0.328425
20120514A1	E04	Tocris	0731	3	C02	CM001RL110	E	4	0.104498	-0.337703
20120514A1	E05	Tocris	0310	1	C03	CM001RL110	E	5	0.854699	-0.207803
20120514A1	E06	Tocris	0735	3	C03	CM001RL110	E	6	1.30213	0.191178
20120514A1	E07	Tocris	0312	1	C04	CM001RL110	E	7	1.78656	-0.755242
20120514A1	E08	Tocris	0736	3	C04	CM001RL110	E	8	-1.8837	0.237571
20120514A1	E09	Tocris	0320	1	C05	CM001RL110	E	9	-0.161268	1.08193
20120514A1	E10	Tocris	0737	3	C05	CM001RL110	E	10	-1.49683	-0.278939
20120514A1	E11	Tocris	0328	1	C06	CM001RL110	E	11	-0.601969	1.61699
20120514A1	E12	Tocris	0740	3	C06	CM001RL110	E	12	-1.14696	-0.804727
20120514A1	E13	Tocris	0329	1	C07	CM001RL110	E	13	-1.6684	-0.254196
20120514A1	E14	Tocris	0741	3	C07	CM001RL110	E	14	-6.9198	-2.41921
20120514A1	E15	Tocris	0342	1	C08	CM001RL110	E	15	-2.67091	0.169528
20120514A1	E16	Tocris	0742	3	C08	CM001RL110	E	16	-1.03258	0.837589
20120514A1	E17	Tocris	0347	1	C09	CM001RL110	E	17	-3.21926	-1.4264
20120514A1	E18	Tocris	0743	3	C09	CM001RL110	E	18	-0.94511	0.636552
20120514A1	E19	Tocris	0348	1	C10	CM001RL110	E	19	-0.0805288	0.862332
20120514A1	E20	Tocris	0744	3	C10	CM001RL110	E	20	0.25252	-0.210895
20120514A1	E21	Tocris	0351	1	C11	CM001RL110	E	21	-0.615425	-0.49544
20120514A1	E22	Tocris	0748	3	C11	CM001RL110	E	22	-1.7155	1.58607
20120514A1	F03	Tocris	0545	2	C02	CM001RL110	F	3	0.979172	0.76336
20120514A1	F04	Tocris	0897	4	C02	CM001RL110	F	4	0.380357	0.775732
20120514A1	F05	Tocris	0552	2	C03	CM001RL110	F	5	1.28867	0.243757
20120514A1	F06	Tocris	0899	4	C03	CM001RL110	F	6	3.16922	-0.136666
20120514A1	F07	Tocris	0553	2	C04	CM001RL110	F	7	-0.972023	0.166435
20120514A1	F08	Tocris	0905	4	C04	CM001RL110	F	8	0.0372157	-1.00886
20120514A1	F09	Tocris	0554	2	C05	CM001RL110	F	9	-0.797088	-0.381004
20120514A1	F10	Tocris	0906	4	C05	CM001RL110	F	10	-0.262192	-0.115016
20120514A1	F11	Tocris	0556	2	C06	CM001RL110	F	11	-0.564963	0.939654
20120514A1	F12	Tocris	0907	4	C06	CM001RL110	F	12	-0.0233386	0.534488
20120514A1	F13	Tocris	0557	2	C07	CM001RL110	F	13	-0.470768	0.0643705
20120514A1	F14	Tocris	0909	4	C07	CM001RL110	F	14	-0.527958	0.754082
20120514A1	F15	Tocris	0558	2	C08	CM001RL110	F	15	0.0103027	0.695317
20120514A1	F16	Tocris	0911	4	C08	CM001RL110	F	16	-0.686072	1.04791
20120514A1	F17	Tocris	0566	2	C09	CM001RL110	F	17	-1.43964	1.17471
20120514A1	F18	Tocris	0912	4	C09	CM001RL110	F	18	25.9747	30.7766
20120514A1	F19	Tocris	0568	2	C10	CM001RL110	F	19	-1.61794	-0.22636
20120514A1	F20	Tocris	0914	4	C10	CM001RL110	F	20	-0.470768	1.76236
20120514A1	F21	Tocris	0569	2	C11	CM001RL110	F	21	-0.696164	0.126228
20120514A1	F22	Tocris	0915	4	C11	CM001RL110	F	22	-0.763447	1.11904
20120514A1	G03	Tocris	0352	1	D02	CM001RL110	G	3	3.83195	-0.56039
20120514A1	G04	Tocris	0750	3	D02	CM001RL110	G	4	-0.706257	-0.49544
20120514A1	G05	Tocris	0357	1	D03	CM001RL110	G	5	1.06664	-0.507811
20120514A1	G06	Tocris	0751	3	D03	CM001RL110	G	6	0.740319	0.184993
20120514A1	G07	Tocris	0360	1	D04	CM001RL110	G	7	1.05318	0.466444
20120514A1	G08	Tocris	0752	3	D04	CM001RL110	G	8	-0.379936	-0.900607
20120514A1	G09	Tocris	0373	1	D05	CM001RL110	G	9	0.188602	0.296336
20120514A1	G10	Tocris	0754	3	D05	CM001RL110	G	10	-3.76089	-1.16041
20120514A1	G11	Tocris	0378	1	D06	CM001RL110	G	11	-2.29076	-1.84393
20120514A1	G12	Tocris	0757	3	D06	CM001RL110	G	12	0.128047	-0.309867
20120514A1	G13	Tocris	0382	1	D07	CM001RL110	G	13	-0.396757	-1.04906
20120514A1	G14	Tocris	0760	3	D07	CM001RL110	G	14	-1.75587	0.500466
20120514A1	G15	Tocris	0383	1	D08	CM001RL110	G	15	-1.86688	1.0077
20120514A1	G16	Tocris	0761	3	D08	CM001RL110	G	16	-1.59439	1.78401
20120514A1	G17	Tocris	0385	1	D09	CM001RL110	G	17	-0.63561	0.887075
20120514A1	G18	Tocris	0763	3	D09	CM001RL110	G	18	-1.73904	1.15616
20120514A1	G19	Tocris	0386	1	D10	CM001RL110	G	19	0.0136668	0.416958
20120514A1	G20	Tocris	0764	3	D10	CM001RL110	G	20	-2.22348	0.352008
20120514A1	G21	Tocris	0387	1	D11	CM001RL110	G	21	-2.11919	1.06956
20120514A1	G22	Tocris	0767	3	D11	CM001RL110	G	22	-1.83997	0.652017
20120514A1	H03	Tocris	0571	2	D02	CM001RL110	H	3	0.767232	0.986047
20120514A1	H04	Tocris	0916	4	D02	CM001RL110	H	4	0.794145	1.484
20120514A1	H05	Tocris	0572	2	D03	CM001RL110	H	5	1.62508	1.93556
20120514A1	H06	Tocris	0917	4	D03	CM001RL110	H	6	0.844607	-0.0593445
20120514A1	H07	Tocris	0573	2	D04	CM001RL110	H	7	0.437547	0.389122
20120514A1	H08	Tocris	0918	4	D04	CM001RL110	H	8	-0.221822	0.401494
20120514A1	H09	Tocris	0577	2	D05	CM001RL110	H	9	0.117955	-0.551112
20120514A1	H10	Tocris	0919	4	D05	CM001RL110	H	10	-0.551507	0.38603
20120514A1	H11	Tocris	0581	2	D06	CM001RL110	H	11	-1.38581	1.04172
20120514A1	H12	Tocris	0922	4	D06	CM001RL110	H	12	-1.34881	1.48091
20120514A1	H13	Tocris	0582	2	D07	CM001RL110	H	13	-2.10574	-0.804727
20120514A1	H14	Tocris	0924	4	D07	CM001RL110	H	14	-0.595241	-0.0655303
20120514A1	H15	Tocris	0583	2	D08	CM001RL110	H	15	-1.19406	0.423144
20120514A1	H16	Tocris	0925	4	D08	CM001RL110	H	16	-0.73317	-0.00985854
20120514A1	H17	Tocris	0584	2	D09	CM001RL110	H	17	-0.968659	-0.02223
20120514A1	H18	Tocris	0926	4	D09	CM001RL110	H	18	-0.98548	0.209736
20120514A1	H19	Tocris	0588	2	D10	CM001RL110	H	19	-1.72222	0.265407
20120514A1	H20	Tocris	0927	4	D10	CM001RL110	H	20	-2.18647	0.364379
20120514A1	H21	Tocris	0589	2	D11	CM001RL110	H	21	-0.107442	1.11904
20120514A1	H22	Tocris	0928	4	D11	CM001RL110	H	22	-0.975387	1.24276
20120514A1	I03	Tocris	0391	1	E02	CM001RL110	I	3	-2.02836	-0.461418
20120514A1	I04	Tocris	0768	3	E02	CM001RL110	I	4	-0.346295	0.222107
20120514A1	I05	Tocris	0393	1	E03	CM001RL110	I	5	-1.80633	-0.832563
20120514A1	I06	Tocris	0773	3	E03	CM001RL110	I	6	0.0742211	-0.548019
20120514A1	I07	Tocris	0395	1	E04	CM001RL110	I	7	0.0372157	0.621088
20120514A1	I08	Tocris	0775	3	E04	CM001RL110	I	8	-0.719713	-0.309867
20120514A1	I09	Tocris	0405	1	E05	CM001RL110	I	9	-2.36814	-0.356261
20120514A1	I10	Tocris	0778	3	E05	CM001RL110	I	10	-1.66503	-0.374818
20120514A1	I11	Tocris	0411	1	E06	CM001RL110	I	11	-1.77941	0.129321
20120514A1	I12	Tocris	0779	3	E06	CM001RL110	I	12	-1.6213	-0.29131
20120514A1	I13	Tocris	0412	1	E07	CM001RL110	I	13	-1.21761	0.228293
20120514A1	I14	Tocris	0780	3	E07	CM001RL110	I	14	-2.43878	0.772639
20120514A1	I15	Tocris	0415	1	E08	CM001RL110	I	15	-1.41272	-0.476883
20120514A1	I16	Tocris	0781	3	E08	CM001RL110	I	16	-6.20324	-1.92125
20120514A1	I17	Tocris	0416	1	E09	CM001RL110	I	17	-0.689436	0.413865
20120514A1	I18	Tocris	0782	3	E09	CM001RL110	I	18	-2.60026	0.500466
20120514A1	I19	Tocris	0420	1	E10	CM001RL110	I	19	-4.17131	-0.408839
20120514A1	I20	Tocris	0783	3	E10	CM001RL110	I	20	-1.47664	0.277779
20120514A1	I21	Tocris	0421	1	E11	CM001RL110	I	21	-2.9434	-0.127388
20120514A1	I22	Tocris	0784	3	E11	CM001RL110	I	22	-1.02249	-0.0500659
20120514A1	J03	Tocris	0590	2	E02	CM001RL110	J	3	2.56031	3.5686
20120514A1	J04	Tocris	0929	4	E02	CM001RL110	J	4	-0.554871	0.299429
20120514A1	J05	Tocris	0593	2	E03	CM001RL110	J	5	-0.11417	1.04172
20120514A1	J06	Tocris	0930	4	E03	CM001RL110	J	6	-0.36648	-0.000579914
20120514A1	J07	Tocris	0597	2	E04	CM001RL110	J	7	-1.20078	-0.272753
20120514A1	J08	Tocris	0932	4	E04	CM001RL110	J	8	-0.813909	0.231386
20120514A1	J09	Tocris	0599	2	E05	CM001RL110	J	9	-0.568327	-0.235638
20120514A1	J10	Tocris	0933	4	E05	CM001RL110	J	10	-1.38245	0.413865
20120514A1	J11	Tocris	0600	2	E06	CM001RL110	J	11	-3.13179	0.20355
20120514A1	J12	Tocris	0934	4	E06	CM001RL110	J	12	-1.67513	0.961304
20120514A1	J13	Tocris	0601	2	E07	CM001RL110	J	13	-3.74743	0.0705562
20120514A1	J14	Tocris	0935	4	E07	CM001RL110	J	14	-2.22011	-0.739777
20120514A1	J15	Tocris	0602	2	E08	CM001RL110	J	15	-1.31516	0.475723
20120514A1	J16	Tocris	0937	4	E08	CM001RL110	J	16	-0.894648	-0.272753
20120514A1	J17	Tocris	0604	2	E09	CM001RL110	J	17	0.841243	1.9201
20120514A1	J18	Tocris	0946	4	E09	CM001RL110	J	18	-1.33535	0.682945
20120514A1	J19	Tocris	2239	2	E10	CM001RL110	J	19	-1.72222	0.0396275
20120514A1	J20	Tocris	0947	4	E10	CM001RL110	J	20	-2.08891	-1.25629
20120514A1	J21	Tocris	0609	2	E11	CM001RL110	J	21	-0.908105	0.621088
20120514A1	J22	Tocris	0948	4	E11	CM001RL110	J	22	-2.7281	0.240664
20120514A1	K03	Tocris	0424	1	F02	CM001RL110	K	3	-3.7037	-1.71403
20120514A1	K04	Tocris	0785	3	F02	CM001RL110	K	4	0.000210258	0.3118
20120514A1	K05	Tocris	0425	1	F03	CM001RL110	K	5	-0.793724	1.03553
20120514A1	K06	Tocris	0786	3	F03	CM001RL110	K	6	0.683129	0.0952992
20120514A1	K07	Tocris	0426	1	F04	CM001RL110	K	7	-0.0603441	0.0334417
20120514A1	K08	Tocris	0787	3	F04	CM001RL110	K	8	-0.726442	1.31389
20120514A1	K09	Tocris	0427	1	F05	CM001RL110	K	9	0.972444	1.56751
20120514A1	K10	Tocris	0788	3	F05	CM001RL110	K	10	-0.908105	0.355101
20120514A1	K11	Tocris	0430	1	F06	CM001RL110	K	11	-0.15454	0.376751
20120514A1	K12	Tocris	0790	3	F06	CM001RL110	K	12	-0.57842	-0.49544
20120514A1	K13	Tocris	0431	1	F07	CM001RL110	K	13	-0.470768	1.23038
20120514A1	K14	Tocris	0791	3	F07	CM001RL110	K	14	-1.12341	-0.585133
20120514A1	K15	Tocris	0432	1	F08	CM001RL110	K	15	-2.06536	-0.232546
20120514A1	K16	Tocris	0792	3	F08	CM001RL110	K	16	-1.45309	0.404587
20120514A1	K17	Tocris	0433	1	F09	CM001RL110	K	17	-0.988844	0.138599
20120514A1	K18	Tocris	0793	3	F09	CM001RL110	K	18	-0.94511	-0.702663
20120514A1	K19	Tocris	0438	1	F10	CM001RL110	K	19	-1.22097	1.32008
20120514A1	K20	Tocris	0800	3	F10	CM001RL110	K	20	-0.447219	0.871611
20120514A1	K21	Tocris	0439	1	F11	CM001RL110	K	21	-0.810545	1.62009
20120514A1	K22	Tocris	0805	3	F11	CM001RL110	K	22	-1.55065	0.528302
20120514A1	L03	Tocris	0610	2	F02	CM001RL110	L	3	2.12298	0.00560584
20120514A1	L04	Tocris	0950	4	F02	CM001RL110	L	4	1.56117	0.40768
20120514A1	L05	Tocris	0620	2	F03	CM001RL110	L	5	-0.15454	-0.071716
20120514A1	L06	Tocris	0952	4	F03	CM001RL110	L	6	-0.0603441	0.342729
20120514A1	L07	Tocris	0623	2	F04	CM001RL110	L	7	-1.14696	-0.588226
20120514A1	L08	Tocris	0955	4	F04	CM001RL110	L	8	0.104498	-0.235638
20120514A1	L09	Tocris	0624	2	F05	CM001RL110	L	9	1.17093	0.47263
20120514A1	L10	Tocris	0956	4	F05	CM001RL110	L	10	0.141504	0.614902
20120514A1	L11	Tocris	0627	2	F06	CM001RL110	L	11	0.124683	-0.303682
20120514A1	L12	Tocris	0959	4	F06	CM001RL110	L	12	-0.231915	-0.467604
20120514A1	L13	Tocris	0629	2	F07	CM001RL110	L	13	-1.06286	0.982954
20120514A1	L14	Tocris	0961	4	F07	CM001RL110	L	14	-0.410214	-0.0129514
20120514A1	L15	Tocris	0630	2	F08	CM001RL110	L	15	1.14401	0.330358
20120514A1	L16	Tocris	0963	4	F08	CM001RL110	L	16	-0.601969	-0.387189
20120514A1	L17	Tocris	0631	2	F09	CM001RL110	L	17	-0.242007	-0.498533
20120514A1	L18	Tocris	0964	4	F09	CM001RL110	L	18	-0.659159	1.44689
20120514A1	L19	Tocris	2559	2	F10	CM001RL110	L	19	-1.51701	0.0179773
20120514A1	L20	Tocris	0969	4	F10	CM001RL110	L	20	-0.450583	0.986047
20120514A1	L21	Tocris	0636	2	F11	CM001RL110	L	21	-0.107442	1.40977
20120514A1	L22	Tocris	0985	4	F11	CM001RL110	L	22	-1.04267	-1.47279
20120514A1	M03	Tocris	0440	1	G02	CM001RL110	M	3	-1.0965	-0.643898
20120514A1	M04	Tocris	0807	3	G02	CM001RL110	M	4	-0.501045	-0.58204
20120514A1	M05	Tocris	0442	1	G03	CM001RL110	M	5	-3.04769	-0.229453
20120514A1	M06	Tocris	0821	3	G03	CM001RL110	M	6	-3.1217	-0.943907
20120514A1	M07	Tocris	0443	1	G04	CM001RL110	M	7	-1.14023	0.107671
20120514A1	M08	Tocris	0825	3	G04	CM001RL110	M	8	-1.00566	0.0643705
20120514A1	M09	Tocris	0448	1	G05	CM001RL110	M	9	-1.65158	-1.27175
20120514A1	M10	Tocris	0826	3	G05	CM001RL110	M	10	-1.95771	1.42214
20120514A1	M11	Tocris	0454	1	G06	CM001RL110	M	11	-1.76932	-0.381004
20120514A1	M12	Tocris	0829	3	G06	CM001RL110	M	12	-3.18562	-0.532554
20120514A1	M13	Tocris	0455	1	G07	CM001RL110	M	13	-1.1335	-1.55939
20120514A1	M14	Tocris	0830	3	G07	CM001RL110	M	14	-1.15032	-0.282032
20120514A1	M15	Tocris	0456	1	G08	CM001RL110	M	15	-2.24366	1.50565
20120514A1	M16	Tocris	0833	3	G08	CM001RL110	M	16	-0.393393	-0.767613
20120514A1	M17	Tocris	0457	1	G09	CM001RL110	M	17	-3.33701	-0.922257
20120514A1	M18	Tocris	0834	3	G09	CM001RL110	M	18	-2.52289	-0.427397
20120514A1	M19	Tocris	0458	1	G10	CM001RL110	M	19	-3.23272	-1.30268
20120514A1	M20	Tocris	0835	3	G10	CM001RL110	M	20	-3.54558	0.599438
20120514A1	M21	Tocris	0460	1	G11	CM001RL110	M	21	-2.14947	0.280872
20120514A1	M22	Tocris	0836	3	G11	CM001RL110	M	22	-1.94089	1.81803
20120514A1	N03	Tocris	0640	2	G02	CM001RL110	N	3	0.710041	0.475723
20120514A1	N04	Tocris	0986	4	G02	CM001RL110	N	4	-0.786996	0.806661
20120514A1	N05	Tocris	0641	2	G03	CM001RL110	N	5	-0.73317	1.04791
20120514A1	N06	Tocris	0987	4	G03	CM001RL110	N	6	0.625938	-0.20471
20120514A1	N07	Tocris	0644	2	G04	CM001RL110	N	7	-1.35553	0.534488
20120514A1	N08	Tocris	0988	4	G04	CM001RL110	N	8	0.0674928	-0.662455
20120514A1	N09	Tocris	0646	2	G05	CM001RL110	N	9	-1.85343	0.215921
20120514A1	N10	Tocris	0989	4	G05	CM001RL110	N	10	1.87403	0.67676
20120514A1	N11	Tocris	0649	2	G06	CM001RL110	N	11	-1.2647	-0.263474
20120514A1	N12	Tocris	0990	4	G06	CM001RL110	N	12	-2.25039	-0.10883
20120514A1	N13	Tocris	0653	2	G07	CM001RL110	N	13	-2.66754	-0.149038
20120514A1	N14	Tocris	0991	4	G07	CM001RL110	N	14	-10.3579	-5.45023
20120514A1	N15	Tocris	0658	2	G08	CM001RL110	N	15	-1.64149	0.645831
20120514A1	N16	Tocris	0992	4	G08	CM001RL110	N	16	-1.56075	0.0458132
20120514A1	N17	Tocris	0659	2	G09	CM001RL110	N	17	-2.03172	0.908725
20120514A1	N18	Tocris	0995	4	G09	CM001RL110	N	18	-2.33449	-0.80782
20120514A1	N19	Tocris	0660	2	G10	CM001RL110	N	19	-0.235279	-0.170688
20120514A1	N20	Tocris	0997	4	G10	CM001RL110	N	20	-1.26134	-0.207803
20120514A1	N21	Tocris	2828	2	G11	CM001RL110	N	21	-1.67849	0.361287
20120514A1	N22	Tocris	0998	4	G11	CM001RL110	N	22	-1.37572	0.648924
20120514A1	O03	Tocris	0464	1	H02	CM001RL110	O	3	0.989264	-0.67792
20120514A1	O04	Tocris	0837	3	H02	CM001RL110	O	4	0.138139	0.348915
20120514A1	O05	Tocris	0469	1	H03	CM001RL110	O	5	1.44679	1.38193
20120514A1	O06	Tocris	0839	3	H03	CM001RL110	O	6	-0.601969	0.314893
20120514A1	O07	Tocris	0474	1	H04	CM001RL110	O	7	-0.649067	0.206643
20120514A1	O08	Tocris	0841	3	H04	CM001RL110	O	8	0.525014	1.50874
20120514A1	O09	Tocris	0475	1	H05	CM001RL110	O	9	1.50061	0.67676
20120514A1	O10	Tocris	0843	3	H05	CM001RL110	O	10	0.898433	-0.981021
20120514A1	O11	Tocris	0478	1	H06	CM001RL110	O	11	-1.00566	-0.51709
20120514A1	O12	Tocris	0847	3	H06	CM001RL110	O	12	-0.776904	1.9603
20120514A1	O13	Tocris	0481	1	H07	CM001RL110	O	13	-0.824001	-0.510904
20120514A1	O14	Tocris	0855	3	H07	CM001RL110	O	14	0.403906	0.45098
20120514A1	O15	Tocris	0482	1	H08	CM001RL110	O	15	-1.14696	0.200457
20120514A1	O16	Tocris	0864	3	H08	CM001RL110	O	16	-1.62803	-1.05525
20120514A1	O17	Tocris	0483	1	H09	CM001RL110	O	17	1.00608	0.191178
20120514A1	O18	Tocris	0867	3	H09	CM001RL110	O	18	0.370264	0.738617
20120514A1	O19	Tocris	0485	1	H10	CM001RL110	O	19	0.471188	0.321079
20120514A1	O20	Tocris	0868	3	H10	CM001RL110	O	20	-0.0771647	1.66957
20120514A1	O21	Tocris	0486	1	H11	CM001RL110	O	21	-1.76932	-0.186152
20120514A1	O22	Tocris	0869	3	H11	CM001RL110	O	22	-0.0670723	0.296336
20120514A1	P03	Tocris	0662	2	H02	CM001RL110	P	3	1.80002	-0.0376944
20120514A1	P04	Tocris	0999	4	H02	CM001RL110	P	4	0.434183	0.277779
20120514A1	P05	Tocris	0665	2	H03	CM001RL110	P	5	1.40978	0.887075
20120514A1	P06	Tocris	1000	4	H03	CM001RL110	P	6	3.32397	0.992233
20120514A1	P07	Tocris	0668	2	H04	CM001RL110	P	7	-0.252099	0.129321
20120514A1	P08	Tocris	1002	4	H04	CM001RL110	P	8	1.41651	1.50565
20120514A1	P09	Tocris	0670	2	H05	CM001RL110	P	9	1.15747	-0.133574
20120514A1	P10	Tocris	1004	4	H05	CM001RL110	P	10	0.09777	-0.316053
20120514A1	P11	Tocris	0671	2	H06	CM001RL110	P	11	1.05991	0.611809
20120514A1	P12	Tocris	1006	4	H06	CM001RL110	P	12	-0.0401593	0.144785
20120514A1	P13	Tocris	0675	2	H07	CM001RL110	P	13	1.92786	0.1819
20120514A1	P14	Tocris	1007	4	H07	CM001RL110	P	14	-0.924925	0.141692
20120514A1	P15	Tocris	0678	2	H08	CM001RL110	P	15	1.23821	1.08502
20120514A1	P16	Tocris	1014	4	H08	CM001RL110	P	16	-0.258828	-0.346982
20120514A1	P17	Tocris	0680	2	H09	CM001RL110	P	17	-0.205002	-0.00367279
20120514A1	P18	Tocris	1015	4	H09	CM001RL110	P	18	0.585569	0.664388
20120514A1	P19	Tocris	0681	2	H10	CM001RL110	P	19	-0.221822	1.04791
20120514A1	P20	Tocris	1018	4	H10	CM001RL110	P	20	-1.07631	0.423144
20120514A1	P21	Tocris	0685	2	H11	CM001RL110	P	21	0.609118	1.50874
20120514A1	P22	Tocris	1025	4	H11	CM001RL110	P	22	-0.403485	0.574695
20120514B1	A03	Tocris	1027	5	A02	CM002RL110	A	3	-2.96691	1.4226
20120514B1	A04	Tocris	1430	7	A02	CM002RL110	A	4	-1.01812	1.19791
20120514B1	A05	Tocris	1028	5	A03	CM002RL110	A	5	-1.67682	0.228348
20120514B1	A06	Tocris	1435	7	A03	CM002RL110	A	6	-2.60855	1.19176
20120514B1	A07	Tocris	1029	5	A04	CM002RL110	A	7	-1.17853	0.899348
20120514B1	A08	Tocris	1437	7	A04	CM002RL110	A	8	-3.4379	0.871646
20120514B1	A09	Tocris	1031	5	A05	CM002RL110	A	9	-2.04883	1.84429
20120514B1	A10	Tocris	1440	7	A05	CM002RL110	A	10	-3.78943	0.468431
20120514B1	A11	Tocris	1032	5	A06	CM002RL110	A	11	-2.93278	0.98861
20120514B1	A12	Tocris	1441	7	A06	CM002RL110	A	12	-2.64609	0.92705
20120514B1	A13	Tocris	1033	5	A07	CM002RL110	A	13	-3.15462	0.554614
20120514B1	A14	Tocris	1442	7	A07	CM002RL110	A	14	-2.83381	0.902426
20120514B1	A15	Tocris	1034	5	A08	CM002RL110	A	15	-3.67339	0.631564
20120514B1	A16	Tocris	1447	7	A08	CM002RL110	A	16	-2.9123	0.548458
20120514B1	A17	Tocris	1035	5	A09	CM002RL110	A	17	-3.18534	0.243738
20120514B1	A18	Tocris	1448	7	A09	CM002RL110	A	18	-3.14438	0.474587
20120514B1	A19	Tocris	1036	5	A10	CM002RL110	A	19	-4.96007	-0.0363587
20120514B1	A20	Tocris	1453	7	A10	CM002RL110	A	20	-3.07954	0.594628
20120514B1	A21	Tocris	1041	5	A11	CM002RL110	A	21	-3.41059	0.166788
20120514B1	A22	Tocris	1454	7	A11	CM002RL110	A	22	-2.885	1.27794
20120514B1	B03	Tocris	1224	6	A02	CM002RL110	B	3	-0.796282	1.63806
20120514B1	B04	Tocris	1671	8	A02	CM002RL110	B	4	-4.93618	-1.94779
20120514B1	B05	Tocris	1226	6	A03	CM002RL110	B	5	-0.20243	0.893192
20120514B1	B06	Tocris	1672	8	A03	CM002RL110	B	6	-2.05907	0.683889
20120514B1	B07	Tocris	1227	6	A04	CM002RL110	B	7	-2.47545	-0.294909
20120514B1	B08	Tocris	1675	8	A04	CM002RL110	B	8	62.4421	63.8533
20120514B1	B09	Tocris	1228	6	A05	CM002RL110	B	9	-2.41402	0.8501
20120514B1	B10	Tocris	1676	8	A05	CM002RL110	B	10	-3.41742	1.77042
20120514B1	B11	Tocris	1231	6	A06	CM002RL110	B	11	-1.85771	0.434573
20120514B1	B12	Tocris	1677	8	A06	CM002RL110	B	12	0.118386	1.7735
20120514B1	B13	Tocris	1236	6	A07	CM002RL110	B	13	-4.00786	0.948596
20120514B1	B14	Tocris	1682	8	A07	CM002RL110	B	14	-4.45837	1.64114
20120514B1	B15	Tocris	1238	6	A08	CM002RL110	B	15	-2.72801	1.16713
20120514B1	B16	Tocris	1691	8	A08	CM002RL110	B	16	-5.24676	1.49648
20120514B1	B17	Tocris	1242	6	A09	CM002RL110	B	17	-13.3866	-3.62221
20120514B1	B18	Tocris	1692	8	A09	CM002RL110	B	18	-3.50616	0.653109
20120514B1	B19	Tocris	1243	6	A10	CM002RL110	B	19	-4.68362	0.917816
20120514B1	B20	Tocris	1694	8	A10	CM002RL110	B	20	-4.13755	0.871646
20120514B1	B21	Tocris	1244	6	A11	CM002RL110	B	21	-5.48225	0.373013
20120514B1	B22	Tocris	1695	8	A11	CM002RL110	B	22	-6.02491	-2.28021
20120514B1	C03	Tocris	1042	5	B02	CM002RL110	C	3	2.94771	0.028279
20120514B1	C04	Tocris	1459	7	B02	CM002RL110	C	4	1.0706	2.68458
20120514B1	C05	Tocris	1043	5	B03	CM002RL110	C	5	-2.61538	0.822399
20120514B1	C06	Tocris	1460	7	B03	CM002RL110	C	6	-2.11368	0.219114
20120514B1	C07	Tocris	1044	5	B04	CM002RL110	C	7	10.2992	13.0512
20120514B1	C08	Tocris	1461	7	B04	CM002RL110	C	8	-2.31845	0.671577
20120514B1	C09	Tocris	1046	5	B05	CM002RL110	C	9	-2.65975	-0.0948403
20120514B1	C10	Tocris	1470	7	B05	CM002RL110	C	10	-4.01127	0.948596
20120514B1	C11	Tocris	1047	5	B06	CM002RL110	C	11	-2.79627	-0.0517486
20120514B1	C12	Tocris	1471	7	B06	CM002RL110	C	12	-3.34916	0.86549
20120514B1	C13	Tocris	1048	5	B07	CM002RL110	C	13	-2.39012	0.831632
20120514B1	C14	Tocris	1472	7	B07	CM002RL110	C	14	67.5342	4.74683
20120514B1	C15	Tocris	1049	5	B08	CM002RL110	C	15	-3.39012	0.274518
20120514B1	C16	Tocris	1477	7	B08	CM002RL110	C	16	-10.9976	-4.04081
20120514B1	C17	Tocris	1050	5	B09	CM002RL110	C	17	-2.71094	0.0898386
20120514B1	C18	Tocris	1479	7	B09	CM002RL110	C	18	-3.04882	0.557692
20120514B1	C19	Tocris	1052	5	B10	CM002RL110	C	19	-2.88159	0.683889
20120514B1	C20	Tocris	1480	7	B10	CM002RL110	C	20	-4.47543	-0.319533
20120514B1	C21	Tocris	1057	5	B11	CM002RL110	C	21	-11.902	-4.63179
20120514B1	C22	Tocris	1484	7	B11	CM002RL110	C	22	-3.48568	0.108306
20120514B1	D03	Tocris	1248	6	B02	CM002RL110	D	3	-1.26044	0.0529028
20120514B1	D04	Tocris	1697	8	B02	CM002RL110	D	4	-0.267276	-0.00557884
20120514B1	D05	Tocris	1249	6	B03	CM002RL110	D	5	-0.526659	6.1904
20120514B1	D06	Tocris	1698	8	B03	CM002RL110	D	6	1.65762	1.25332
20120514B1	D07	Tocris	1250	6	B04	CM002RL110	D	7	-0.308231	1.35181
20120514B1	D08	Tocris	1699	8	B04	CM002RL110	D	8	-3.1751	-0.738139
20120514B1	D09	Tocris	1251	6	B05	CM002RL110	D	9	3.85897	1.48724
20120514B1	D10	Tocris	1701	8	B05	CM002RL110	D	10	-3.3594	0.92705
20120514B1	D11	Tocris	1255	6	B06	CM002RL110	D	11	-1.91573	1.60421
20120514B1	D12	Tocris	1702	8	B06	CM002RL110	D	12	-2.21606	0.428417
20120514B1	D13	Tocris	1256	6	B07	CM002RL110	D	13	-1.49252	0.57616
20120514B1	D14	Tocris	1705	8	B07	CM002RL110	D	14	-3.13415	0.200646
20120514B1	D15	Tocris	1259	6	B08	CM002RL110	D	15	-2.77579	0.588472
20120514B1	D16	Tocris	1706	8	B08	CM002RL110	D	16	-3.88499	0.409949
20120514B1	D17	Tocris	1262	6	B09	CM002RL110	D	17	-2.31163	0.797775
20120514B1	D18	Tocris	1709	8	B09	CM002RL110	D	18	-3.43448	-0.56885
20120514B1	D19	Tocris	1263	6	B10	CM002RL110	D	19	-2.07272	-0.941286
20120514B1	D20	Tocris	1710	8	B10	CM002RL110	D	20	-0.902083	-0.510368
20120514B1	D21	Tocris	1264	6	B11	CM002RL110	D	21	-3.49592	-0.525758
20120514B1	D22	Tocris	1742	8	B11	CM002RL110	D	22	-3.80991	0.440729
20120514B1	E03	Tocris	1059	5	C02	CM002RL110	E	3	-1.95327	-1.28602
20120514B1	E04	Tocris	1493	7	C02	CM002RL110	E	4	-1.73143	0.533068
20120514B1	E05	Tocris	1060	5	C03	CM002RL110	E	5	-1.63586	-0.473432
20120514B1	E06	Tocris	1496	7	C03	CM002RL110	E	6	10.3538	13.4483
20120514B1	E07	Tocris	1061	5	C04	CM002RL110	E	7	-2.48227	0.262206
20120514B1	E08	Tocris	1497	7	C04	CM002RL110	E	8	-2.34576	-0.439574
20120514B1	E09	Tocris	1066	5	C05	CM002RL110	E	9	-3.1751	0.477664
20120514B1	E10	Tocris	1505	7	C05	CM002RL110	E	10	-0.472052	0.890114
20120514B1	E11	Tocris	1070	5	C06	CM002RL110	E	11	-2.79627	-0.978221
20120514B1	E12	Tocris	1506	7	C06	CM002RL110	E	12	-2.42425	-0.611941
20120514B1	E13	Tocris	1072	5	C07	CM002RL110	E	13	-1.75532	-0.119464
20120514B1	E14	Tocris	1507	7	C07	CM002RL110	E	14	-3.66656	0.348389
20120514B1	E15	Tocris	1074	5	C08	CM002RL110	E	15	-2.75872	-0.655033
20120514B1	E16	Tocris	1508	7	C08	CM002RL110	E	16	-3.18534	0.0713707
20120514B1	E17	Tocris	1075	5	C09	CM002RL110	E	17	-2.05566	0.671577
20120514B1	E18	Tocris	1509	7	C09	CM002RL110	E	18	-2.48569	0.890114
20120514B1	E19	Tocris	1076	5	C10	CM002RL110	E	19	-1.48911	0.206802
20120514B1	E20	Tocris	1510	7	C10	CM002RL110	E	20	-2.31504	0.332999
20120514B1	E21	Tocris	1079	5	C11	CM002RL110	E	21	-2.85428	-0.359547
20120514B1	E22	Tocris	1511	7	C11	CM002RL110	E	22	-2.14439	-0.0486706
20120514B1	F03	Tocris	1267	6	C02	CM002RL110	F	3	1.53476	0.449963
20120514B1	F04	Tocris	1746	8	C02	CM002RL110	F	4	-0.867953	0.022123
20120514B1	F05	Tocris	1274	6	C03	CM002RL110	F	5	1.27196	-0.11023
20120514B1	F06	Tocris	1747	8	C03	CM002RL110	F	6	2.06718	-0.254895
20120514B1	F07	Tocris	1282	6	C04	CM002RL110	F	7	-2.37989	-0.547304
20120514B1	F08	Tocris	1757	8	C04	CM002RL110	F	8	-1.87818	0.770073
20120514B1	F09	Tocris	1284	6	C05	CM002RL110	F	9	-0.997645	-0.184102
20120514B1	F10	Tocris	1758	8	C05	CM002RL110	F	10	-0.332122	0.730059
20120514B1	F11	Tocris	1295	6	C06	CM002RL110	F	11	1.84533	1.06248
20120514B1	F12	Tocris	1760	8	C06	CM002RL110	F	12	-0.946451	1.50263
20120514B1	F13	Tocris	1296	6	C07	CM002RL110	F	13	0.357292	1.33334
20120514B1	F14	Tocris	1761	8	C07	CM002RL110	F	14	-2.10685	0.0959946
20120514B1	F15	Tocris	1302	6	C08	CM002RL110	F	15	0.616676	0.588472
20120514B1	F16	Tocris	1762	8	C08	CM002RL110	F	16	-2.41402	-0.0517486
20120514B1	F17	Tocris	1304	6	C09	CM002RL110	F	17	-1.08297	-0.11023
20120514B1	F18	Tocris	1767	8	C09	CM002RL110	F	18	-1.75873	-0.368781
20120514B1	F19	Tocris	1305	6	C10	CM002RL110	F	19	-2.3321	0.292986
20120514B1	F20	Tocris	1771	8	C10	CM002RL110	F	20	-2.98398	0.182178
20120514B1	F21	Tocris	1307	6	C11	CM002RL110	F	21	-1.56419	0.951674
20120514B1	F22	Tocris	1772	8	C11	CM002RL110	F	22	-1.51982	0.305297
20120514B1	G03	Tocris	1081	5	D02	CM002RL110	G	3	-1.44815	-0.0917624
20120514B1	G04	Tocris	1512	7	D02	CM002RL110	G	4	-1.49935	-1.23062
20120514B1	G05	Tocris	1082	5	D03	CM002RL110	G	5	-1.61539	0.246816
20120514B1	G06	Tocris	1513	7	D03	CM002RL110	G	6	-0.89867	-0.294909
20120514B1	G07	Tocris	1088	5	D04	CM002RL110	G	7	-0.475465	-0.384171
20120514B1	G08	Tocris	1514	7	D04	CM002RL110	G	8	-3.3321	0.0621368
20120514B1	G09	Tocris	1089	5	D05	CM002RL110	G	9	-2.4106	-0.325689
20120514B1	G10	Tocris	1516	7	D05	CM002RL110	G	10	-2.04201	0.48382
20120514B1	G11	Tocris	1091	5	D06	CM002RL110	G	11	-1.61539	-0.81201
20120514B1	G12	Tocris	1518	7	D06	CM002RL110	G	12	-1.27409	-0.439574
20120514B1	G13	Tocris	1093	5	D07	CM002RL110	G	13	-1.06249	0.742371
20120514B1	G14	Tocris	1524	7	D07	CM002RL110	G	14	-1.38672	1.71809
20120514B1	G15	Tocris	1097	5	D08	CM002RL110	G	15	-2.32187	-0.571928
20120514B1	G16	Tocris	1526	7	D08	CM002RL110	G	16	-3.571	0.182178
20120514B1	G17	Tocris	1098	5	D09	CM002RL110	G	17	-2.65633	0.493054
20120514B1	G18	Tocris	3862	7	D09	CM002RL110	G	18	-1.42085	-0.322611
20120514B1	G19	Tocris	1099	5	D10	CM002RL110	G	19	-1.16488	-0.439574
20120514B1	G20	Tocris	1530	7	D10	CM002RL110	G	20	-2.19559	0.400715
20120514B1	G21	Tocris	1101	5	D11	CM002RL110	G	21	-1.27751	-0.411872
20120514B1	G22	Tocris	1531	7	D11	CM002RL110	G	22	-2.56419	1.24408
20120514B1	H03	Tocris	3857	6	D02	CM002RL110	H	3	0.0433017	0.683889
20120514B1	H04	Tocris	1777	8	D02	CM002RL110	H	4	0.486984	0.296063
20120514B1	H05	Tocris	1312	6	D03	CM002RL110	H	5	0.394834	1.16098
20120514B1	H06	Tocris	1778	8	D03	CM002RL110	H	6	0.398247	0.831632
20120514B1	H07	Tocris	1317	6	D04	CM002RL110	H	7	-5.18532	-0.913584
20120514B1	H08	Tocris	1779	8	D04	CM002RL110	H	8	-0.454988	0.770073
20120514B1	H09	Tocris	1321	6	D05	CM002RL110	H	9	-0.762152	-0.0363587
20120514B1	H10	Tocris	1780	8	D05	CM002RL110	H	10	-2.68705	-0.427262
20120514B1	H11	Tocris	1322	6	D06	CM002RL110	H	11	-1.46863	-0.325689
20120514B1	H12	Tocris	1795	8	D06	CM002RL110	H	12	-2.42084	-1.57843
20120514B1	H13	Tocris	1324	6	D07	CM002RL110	H	13	-0.710958	0.443807
20120514B1	H14	Tocris	1797	8	D07	CM002RL110	H	14	-2.20924	0.243738
20120514B1	H15	Tocris	1325	6	D08	CM002RL110	H	15	-2.14439	0.520756
20120514B1	H16	Tocris	1798	8	D08	CM002RL110	H	16	-1.63586	0.434573
20120514B1	H17	Tocris	1327	6	D09	CM002RL110	H	17	-1.86112	-0.485744
20120514B1	H18	Tocris	1801	8	D09	CM002RL110	H	18	-1.60856	-0.0794504
20120514B1	H19	Tocris	1328	6	D10	CM002RL110	H	19	-0.721197	1.11481
20120514B1	H20	Tocris	1804	8	D10	CM002RL110	H	20	-2.94302	0.391481
20120514B1	H21	Tocris	3858	6	D11	CM002RL110	H	21	-3.2809	0.0559808
20120514B1	H22	Tocris	1807	8	D11	CM002RL110	H	22	-1.96351	-1.08287
20120514B1	I03	Tocris	1102	5	E02	CM002RL110	I	3	5.48694	-1.36605
20120514B1	I04	Tocris	1540	7	E02	CM002RL110	I	4	0.026237	0.923972
20120514B1	I05	Tocris	1104	5	E03	CM002RL110	I	5	-1.36966	-0.898194
20120514B1	I06	Tocris	1542	7	E03	CM002RL110	I	6	-0.356012	-0.639643
20120514B1	I07	Tocris	1105	5	E04	CM002RL110	I	7	-2.69046	-1.87084
20120514B1	I08	Tocris	1544	7	E04	CM002RL110	I	8	-0.932799	-0.251818
20120514B1	I09	Tocris	1107	5	E05	CM002RL110	I	9	-1.48911	-0.642721
20120514B1	I10	Tocris	1546	7	E05	CM002RL110	I	10	-1.41402	-0.147166
20120514B1	I11	Tocris	1109	5	E06	CM002RL110	I	11	-2.32528	-0.381093
20120514B1	I12	Tocris	1547	7	E06	CM002RL110	I	12	1.13203	0.357623
20120514B1	I13	Tocris	1110	5	E07	CM002RL110	I	13	-2.35941	-0.56885
20120514B1	I14	Tocris	1548	7	E07	CM002RL110	I	14	-1.93962	-0.56885
20120514B1	I15	Tocris	1114	5	E08	CM002RL110	I	15	-1.72119	-1.00284
20120514B1	I16	Tocris	1549	7	E08	CM002RL110	I	16	0.114973	-0.168712
20120514B1	I17	Tocris	1115	5	E09	CM002RL110	I	17	-3.03858	0.025201
20120514B1	I18	Tocris	1550	7	E09	CM002RL110	I	18	43.7426	-0.602707
20120514B1	I19	Tocris	1116	5	E10	CM002RL110	I	19	-3.03176	-0.236428
20120514B1	I20					CM002RL110	I	20	-0.772391	-0.137932
20120514B1	I21	Tocris	1117	5	E11	CM002RL110	I	21	-1.70754	-0.162556
20120514B1	I22	Tocris	1554	7	E11	CM002RL110	I	22	-2.30821	-0.0394366
20120514B1	J03	Tocris	1348	6	E02	CM002RL110	J	3	0.620089	-0.747373
20120514B1	J04	Tocris	1808	8	E02	CM002RL110	J	4	0.265143	-0.701203
20120514B1	J05	Tocris	1349	6	E03	CM002RL110	J	5	0.858994	-0.405717
20120514B1	J06	Tocris	1809	8	E03	CM002RL110	J	6	-0.00789242	-1.47686
20120514B1	J07	Tocris	1350	6	E04	CM002RL110	J	7	-0.86454	-0.221038
20120514B1	J08	Tocris	1810	8	E04	CM002RL110	J	8	-0.847476	-0.344157
20120514B1	J09	Tocris	1356	6	E05	CM002RL110	J	9	-1.70412	-0.8274
20120514B1	J10	Tocris	1813	8	E05	CM002RL110	J	10	-8.9498	-5.53979
20120514B1	J11	Tocris	1357	6	E06	CM002RL110	J	11	-1.05225	-0.978221
20120514B1	J12	Tocris	1816	8	E06	CM002RL110	J	12	-0.441336	-0.239506
20120514B1	J13	Tocris	1361	6	E07	CM002RL110	J	13	-0.338948	-1.34758
20120514B1	J14	Tocris	1821	8	E07	CM002RL110	J	14	0.213949	-0.59963
20120514B1	J15	Tocris	1363	6	E08	CM002RL110	J	15	-0.888431	1.06248
20120514B1	J16	Tocris	1838	8	E08	CM002RL110	J	16	0.0569534	1.13328
20120514B1	J17	Tocris	1366	6	E09	CM002RL110	J	17	-1.53006	-0.56885
20120514B1	J18	Tocris	1842	8	E09	CM002RL110	J	18	-0.762152	0.437651
20120514B1	J19	Tocris	1367	6	E10	CM002RL110	J	19	-2.91913	-0.0732945
20120514B1	J20	Tocris	1847	8	E10	CM002RL110	J	20	-2.7792	-0.41495
20120514B1	J21	Tocris	1371	6	E11	CM002RL110	J	21	-0.588092	-0.630409
20120514B1	J22	Tocris	1849	8	E11	CM002RL110	J	22	-0.60857	0.0498248
20120514B1	K03	Tocris	1120	5	F02	CM002RL110	K	3	-0.960103	-0.90435
20120514B1	K04	Tocris	1558	7	F02	CM002RL110	K	4	0.650805	-0.885882
20120514B1	K05	Tocris	1122	5	F03	CM002RL110	K	5	0.26173	-0.464198
20120514B1	K06	Tocris	1579	7	F03	CM002RL110	K	6	0.268556	0.409949
20120514B1	K07	Tocris	1123	5	F04	CM002RL110	K	7	-1.78603	-1.32603
20120514B1	K08	Tocris	1580	7	F04	CM002RL110	K	8	-0.523246	-2.58185
20120514B1	K09	Tocris	1124	5	F05	CM002RL110	K	9	-3.27408	-0.968987
20120514B1	K10	Tocris	1581	7	F05	CM002RL110	K	10	0.210536	-1.07364
20120514B1	K11	Tocris	1126	5	F06	CM002RL110	K	11	-0.0283701	-0.104074
20120514B1	K12	Tocris	1586	7	F06	CM002RL110	K	12	0.712238	0.456119
20120514B1	K13	Tocris	1129	5	F07	CM002RL110	K	13	1.08083	-0.0394366
20120514B1	K14	Tocris	1588	7	F07	CM002RL110	K	14	0.760019	-0.251818
20120514B1	K15	Tocris	1130	5	F08	CM002RL110	K	15	-0.844063	-0.313377
20120514B1	K16	Tocris	1591	7	F08	CM002RL110	K	16	0.708825	-0.0579045
20120514B1	K17	Tocris	1131	5	F09	CM002RL110	K	17	0.114973	1.22254
20120514B1	K18	Tocris	1594	7	F09	CM002RL110	K	18	-0.31847	0.228348
20120514B1	K19	Tocris	1132	5	F10	CM002RL110	K	19	-2.09661	-0.901272
20120514B1	K20	Tocris	1612	7	F10	CM002RL110	K	20	-0.51642	-0.479588
20120514B1	K21	Tocris	1133	5	F11	CM002RL110	K	21	1.6781	1.82274
20120514B1	K22	Tocris	1614	7	F11	CM002RL110	K	22	-1.21607	-0.384171
20120514B1	L03	Tocris	1375	6	F02	CM002RL110	L	3	1.39141	-0.0979183
20120514B1	L04	Tocris	1850	8	F02	CM002RL110	L	4	-0.089803	-0.775074
20120514B1	L05	Tocris	1376	6	F03	CM002RL110	L	5	1.28561	0.212958
20120514B1	L06	Tocris	1854	8	F03	CM002RL110	L	6	-0.0966289	0.111384
20120514B1	L07	Tocris	1379	6	F04	CM002RL110	L	7	1.13544	-0.242584
20120514B1	L08	Tocris	1856	8	F04	CM002RL110	L	8	0.72589	-0.362625
20120514B1	L09	Tocris	1380	6	F05	CM002RL110	L	9	0.684934	-0.79662
20120514B1	L10	Tocris	1858	8	F05	CM002RL110	L	10	0.534765	0.323765
20120514B1	L11	Tocris	1381	6	F06	CM002RL110	L	11	96.7421	96.8555
20120514B1	L12	Tocris	1862	8	F06	CM002RL110	L	12	-0.51642	-1.14135
20120514B1	L13	Tocris	1382	6	F07	CM002RL110	L	13	0.476745	-0.11023
20120514B1	L14	Tocris	1866	8	F07	CM002RL110	L	14	-0.960103	-0.196414
20120514B1	L15	Tocris	1383	6	F08	CM002RL110	L	15	-0.110281	-1.03978
20120514B1	L16	Tocris	1867	8	F08	CM002RL110	L	16	37.4798	39.5096
20120514B1	L17	Tocris	1385	6	F09	CM002RL110	L	17	-0.89867	-0.725827
20120514B1	L18	Tocris	1870	8	F09	CM002RL110	L	18	-0.0966289	-0.224116
20120514B1	L19	Tocris	1393	6	F10	CM002RL110	L	19	0.166167	-0.131776
20120514B1	L20	Tocris	1937	8	F10	CM002RL110	L	20	-0.659764	-1.1352
20120514B1	L21	Tocris	1394	6	F11	CM002RL110	L	21	0.316337	-0.0209688
20120514B1	L22	Tocris	1941	8	F11	CM002RL110	L	22	-0.185365	-0.550382
20120514B1	M03	Tocris	1134	5	G02	CM002RL110	M	3	-0.509595	-0.990533
20120514B1	M04	Tocris	1615	7	G02	CM002RL110	M	4	-1.55054	-0.719671
20120514B1	M05	Tocris	1139	5	G03	CM002RL110	M	5	-1.98399	-0.18718
20120514B1	M06	Tocris	1616	7	G03	CM002RL110	M	6	145.496	18.647
20120514B1	M07	Tocris	1140	5	G04	CM002RL110	M	7	-0.95669	-1.18445
20120514B1	M08	Tocris	1617	7	G04	CM002RL110	M	8	-0.837237	-0.679657
20120514B1	M09	Tocris	1141	5	G05	CM002RL110	M	9	-1.26044	-0.338001
20120514B1	M10	Tocris	1621	7	G05	CM002RL110	M	10	-0.117107	-1.20599
20120514B1	M11	Tocris	1145	5	G06	CM002RL110	M	11	-0.472052	-2.3787
20120514B1	M12	Tocris	1622	7	G06	CM002RL110	M	12	0.138864	-1.65538
20120514B1	M13	Tocris	1147	5	G07	CM002RL110	M	13	-0.328709	-1.31988
20120514B1	M14	Tocris	1625	7	G07	CM002RL110	M	14	-0.939625	0.0806047
20120514B1	M15	Tocris	1148	5	G08	CM002RL110	M	15	-0.611983	-1.69539
20120514B1	M16	Tocris	1636	7	G08	CM002RL110	M	16	0.26173	-1.03363
20120514B1	M17	Tocris	1202	5	G09	CM002RL110	M	17	-0.205843	-1.39683
20120514B1	M18	Tocris	1638	7	G09	CM002RL110	M	18	-1.07614	-1.35373
20120514B1	M19	Tocris	1206	5	G10	CM002RL110	M	19	-0.427684	-1.62768
20120514B1	M20	Tocris	1639	7	G10	CM002RL110	M	20	-0.915735	-0.8274
20120514B1	M21	Tocris	1207	5	G11	CM002RL110	M	21	-3.1751	-1.53226
20120514B1	M22	Tocris	1641	7	G11	CM002RL110	M	22	-2.07613	-1.66153
20120514B1	N03	Tocris	1395	6	G02	CM002RL110	N	3	2.1798	-1.20599
20120514B1	N04	Tocris	1942	8	G02	CM002RL110	N	4	1.5996	0.702357
20120514B1	N05	Tocris	1396	6	G03	CM002RL110	N	5	-1.22631	-0.968987
20120514B1	N06	Tocris	1944	8	G03	CM002RL110	N	6	0.28562	-0.362625
20120514B1	N07	Tocris	1397	6	G04	CM002RL110	N	7	0.254904	-0.381093
20120514B1	N08	Tocris	1949	8	G04	CM002RL110	N	8	2.92724	-0.621175
20120514B1	N09	Tocris	1398	6	G05	CM002RL110	N	9	0.654218	-1.76311
20120514B1	N10	Tocris	1952	8	G05	CM002RL110	N	10	0.476745	-0.731983
20120514B1	N11	Tocris	1399	6	G06	CM002RL110	N	11	1.25148	-2.25866
20120514B1	N12	Tocris	1953	8	G06	CM002RL110	N	12	0.497223	-0.676579
20120514B1	N13	Tocris	1400	6	G07	CM002RL110	N	13	1.22759	-0.784308
20120514B1	N14	Tocris	1955	8	G07	CM002RL110	N	14	-1.79969	-2.26482
20120514B1	N15	Tocris	1401	6	G08	CM002RL110	N	15	-1.22972	-1.66769
20120514B1	N16	Tocris	1956	8	G08	CM002RL110	N	16	-0.219495	-1.35066
20120514B1	N17	Tocris	1402	6	G09	CM002RL110	N	17	0.524526	-1.32911
20120514B1	N18	Tocris	1957	8	G09	CM002RL110	N	18	-0.134171	-1.02131
20120514B1	N19	Tocris	1403	6	G10	CM002RL110	N	19	-1.2502	-0.676579
20120514B1	N20	Tocris	1960	8	G10	CM002RL110	N	20	-3.15804	-0.701203
20120514B1	N21	Tocris	1405	6	G11	CM002RL110	N	21	-0.239972	-0.128698
20120514B1	N22	Tocris	1961	8	G11	CM002RL110	N	22	-1.1171	-0.328767
20120514B1	O03	Tocris	1210	5	H02	CM002RL110	O	3	1.26855	-0.285675
20120514B1	O04	Tocris	1643	7	H02	CM002RL110	O	4	2.14226	0.219114
20120514B1	O05	Tocris	1211	5	H03	CM002RL110	O	5	2.4426	-1.4707
20120514B1	O06	Tocris	1646	7	H03	CM002RL110	O	6	0.92384	-0.596552
20120514B1	O07	Tocris	1212	5	H04	CM002RL110	O	7	2.05011	-0.301065
20120514B1	O08	Tocris	1657	7	H04	CM002RL110	O	8	1.10131	0.428417
20120514B1	O09	Tocris	1213	5	H05	CM002RL110	O	9	-0.359425	1.09634
20120514B1	O10	Tocris	1658	7	H05	CM002RL110	O	10	0.220775	0.228348
20120514B1	O11	Tocris	1214	5	H06	CM002RL110	O	11	1.67469	0.19449
20120514B1	O12	Tocris	1659	7	H06	CM002RL110	O	12	1.71564	-0.424185
20120514B1	O13	Tocris	1215	5	H07	CM002RL110	O	13	0.507462	-1.05517
20120514B1	O14	Tocris	1660	7	H07	CM002RL110	O	14	0.224188	-0.470354
20120514B1	O15	Tocris	1217	5	H08	CM002RL110	O	15	0.8078	-0.196414
20120514B1	O16	Tocris	1661	7	H08	CM002RL110	O	16	-0.557376	-0.765841
20120514B1	O17	Tocris	1218	5	H09	CM002RL110	O	17	0.995512	0.745449
20120514B1	O18	Tocris	1662	7	H09	CM002RL110	O	18	0.172993	-1.18445
20120514B1	O19	Tocris	1219	5	H10	CM002RL110	O	19	-8.08291	-0.738139
20120514B1	O20	Tocris	1663	7	H10	CM002RL110	O	20	0.0330629	-0.00557884
20120514B1	O21	Tocris	1223	5	H11	CM002RL110	O	21	1.20029	-1.56304
20120514B1	O22	Tocris	1664	7	H11	CM002RL110	O	22	2.45966	0.28683
20120514B1	P03	Tocris	1407	6	H02	CM002RL110	P	3	3.11495	0.468431
20120514B1	P04	Tocris	1962	8	H02	CM002RL110	P	4	3.21051	-0.276441
20120514B1	P05	Tocris	1410	6	H03	CM002RL110	P	5	0.323163	-0.910506
20120514B1	P06	Tocris	1963	8	H03	CM002RL110	P	6	0.507462	0.486898
20120514B1	P07	Tocris	1414	6	H04	CM002RL110	P	7	1.71905	0.585394
20120514B1	P08	Tocris	1965	8	H04	CM002RL110	P	8	1.08083	-1.18445
20120514B1	P09	Tocris	1415	6	H05	CM002RL110	P	9	2.15932	-0.593473
20120514B1	P10	Tocris	1967	8	H05	CM002RL110	P	10	0.572307	-0.624253
20120514B1	P11	Tocris	1417	6	H06	CM002RL110	P	11	0.930666	-0.922818
20120514B1	P12	Tocris	1972	8	H06	CM002RL110	P	12	2.79413	-0.0979183
20120514B1	P13	Tocris	1418	6	H07	CM002RL110	P	13	0.299272	-1.12904
20120514B1	P14	Tocris	1974	8	H07	CM002RL110	P	14	1.56889	-1.09826
20120514B1	P15	Tocris	1419	6	H08	CM002RL110	P	15	1.5996	-0.279519
20120514B1	P16	Tocris	1975	8	H08	CM002RL110	P	16	0.626914	-0.177946
20120514B1	P17	Tocris	1422	6	H09	CM002RL110	P	17	1.14909	-0.439574
20120514B1	P18	Tocris	1982	8	H09	CM002RL110	P	18	0.466506	0.60694
20120514B1	P19	Tocris	1425	6	H10	CM002RL110	P	19	1.43237	-0.390327
20120514B1	P20	Tocris	1994	8	H10	CM002RL110	P	20	0.121799	-0.544226
20120514B1	P21	Tocris	1426	6	H11	CM002RL110	P	21	0.992099	0.462274
20120514B1	P22	Tocris	1995	8	H11	CM002RL110	P	22	1.27879	-0.0332807
20120514C1	A03	Tocris	1996	9	A02	CM003RL110	A	3	1.50706	-0.361972
20120514C1	A04	Tocris	2471	11	A02	CM003RL110	A	4	-9.4418	-6.48859
20120514C1	A05	Tocris	1997	9	A03	CM003RL110	A	5	0.978159	-0.106824
20120514C1	A06	Tocris	2473	11	A03	CM003RL110	A	6	5.85844	0.996766
20120514C1	A07	Tocris	1999	9	A04	CM003RL110	A	7	2.95294	0.111435
20120514C1	A08	Tocris	2474	11	A04	CM003RL110	A	8	4.09659	-0.995229
20120514C1	A09	Tocris	2000	9	A05	CM003RL110	A	9	1.7509	-0.558712
20120514C1	A10	Tocris	2475	11	A05	CM003RL110	A	10	1.03654	-0.444971
20120514C1	A11	Tocris	2001	9	A06	CM003RL110	A	11	1.0022	-1.62849
20120514C1	A12	Tocris	2476	11	A06	CM003RL110	A	12	2.05313	0.148324
20120514C1	A13	Tocris	2002	9	A07	CM003RL110	A	13	-9.08806	-2.68904
20120514C1	A14	Tocris	2478	11	A07	CM003RL110	A	14	1.86767	-1.24116
20120514C1	A15	Tocris	2004	9	A08	CM003RL110	A	15	0.871693	-0.263601
20120514C1	A16	Tocris	2479	11	A08	CM003RL110	A	16	1.42806	-0.601749
20120514C1	A17	Tocris	2005	9	A09	CM003RL110	A	17	2.09777	-0.420379
20120514C1	A18	Tocris	2481	11	A09	CM003RL110	A	18	-3.12595	-1.53319
20120514C1	A19	Tocris	2007	9	A10	CM003RL110	A	19	2.25919	0.219027
20120514C1	A20	Tocris	2483	11	A10	CM003RL110	A	20	2.99415	-0.0484166
20120514C1	A21	Tocris	2008	9	A11	CM003RL110	A	21	1.08463	0.412694
20120514C1	A22	Tocris	2484	11	A11	CM003RL110	A	22	1.83676	-0.863044
20120514C1	B03	Tocris	2255	10	A02	CM003RL110	B	3	2.33131	0.391175
20120514C1	B04	Tocris	2677	12	A02	CM003RL110	B	4	0.452697	0.670915
20120514C1	B05	Tocris	2266	10	A03	CM003RL110	B	5	1.18079	0.378879
20120514C1	B06	Tocris	2678	12	A03	CM003RL110	B	6	3.90427	-0.380416
20120514C1	B07	Tocris	2268	10	A04	CM003RL110	B	7	1.77151	0.274361
20120514C1	B08	Tocris	2681	12	A04	CM003RL110	B	8	2.22485	-0.365046
20120514C1	B09	Tocris	2270	10	A05	CM003RL110	B	9	0.792702	-0.617119
20120514C1	B10	Tocris	2682	12	A05	CM003RL110	B	10	0.724014	-0.106824
20120514C1	B11	Tocris	2271	10	A06	CM003RL110	B	11	0.456131	-1.23193
20120514C1	B12	Tocris	2684	12	A06	CM003RL110	B	12	38.1555	35.7737
20120514C1	B13	Tocris	2272	10	A07	CM003RL110	B	13	-	-
20120514C1	B14	Tocris	2685	12	A07	CM003RL110	B	14	-0.316609	-2.87656
20120514C1	B15	Tocris	2275	10	A08	CM003RL110	B	15	2.5099	0.212879
20120514C1	B16	Tocris	2688	12	A08	CM003RL110	B	16	-2.03724	-2.16337
20120514C1	B17	Tocris	2276	10	A09	CM003RL110	B	17	2.23858	-0.0914535
20120514C1	B18	Tocris	2691	12	A09	CM003RL110	B	18	1.28382	-0.411157
20120514C1	B19	Tocris	2280	10	A10	CM003RL110	B	19	-1.68006	-2.38163
20120514C1	B20	Tocris	2693	12	A10	CM003RL110	B	20	100.905	103.074
20120514C1	B21	Tocris	2281	10	A11	CM003RL110	B	21	2.32101	-0.715489
20120514C1	B22	Tocris	2694	12	A11	CM003RL110	B	22	-5.00113	-3.88178
20120514C1	C03	Tocris	2009	9	B02	CM003RL110	C	3	0.435525	-0.847674
20120514C1	C04	Tocris	2491	11	B02	CM003RL110	C	4	-1.86896	-0.0484166
20120514C1	C05	Tocris	2011	9	B03	CM003RL110	C	5	1.07776	-0.546416
20120514C1	C06	Tocris	2492	11	B03	CM003RL110	C	6	0.607244	-2.6583
20120514C1	C07	Tocris	2012	9	B04	CM003RL110	C	7	0.77553	-0.776971
20120514C1	C08	Tocris	2495	11	B04	CM003RL110	C	8	0.823612	-0.798489
20120514C1	C09	Tocris	2013	9	B05	CM003RL110	C	9	2.1802	-1.01367
20120514C1	C10	Tocris	2496	11	B05	CM003RL110	C	10	0.0646096	-0.454194
20120514C1	C11	Tocris	2018	9	B06	CM003RL110	C	11	0.741186	-0.386564
20120514C1	C12	Tocris	2498	11	B06	CM003RL110	C	12	0.160773	-1.07208
20120514C1	C13	Tocris	2019	9	B07	CM003RL110	C	13	0.504212	-1.27497
20120514C1	C14	Tocris	2499	11	B07	CM003RL110	C	14	-0.605098	-1.30264
20120514C1	C15	Tocris	2020	9	B08	CM003RL110	C	15	2.58889	-0.275898
20120514C1	C16	Tocris	2504	11	B08	CM003RL110	C	16	1.08806	-0.500305
20120514C1	C17	Tocris	2021	9	B09	CM003RL110	C	17	3.27921	-0.813859
20120514C1	C18	Tocris	2508	11	B09	CM003RL110	C	18	1.48645	-0.989081
20120514C1	C19	Tocris	2022	9	B10	CM003RL110	C	19	1.2117	-0.28512
20120514C1	C20	Tocris	2510	11	B10	CM003RL110	C	20	1.02281	-0.183675
20120514C1	C21	Tocris	2023	9	B11	CM003RL110	C	21	1.62039	-0.371194
20120514C1	C22	Tocris	2513	11	B11	CM003RL110	C	22	0.541991	-0.365046
20120514C1	D03	Tocris	2282	10	B02	CM003RL110	D	3	2.04626	0.612508
20120514C1	D04	Tocris	2700	12	B02	CM003RL110	D	4	1.67534	-0.531045
20120514C1	D05	Tocris	2284	10	B03	CM003RL110	D	5	0.579769	-0.248231
20120514C1	D06	Tocris	2706	12	B03	CM003RL110	D	6	2.18363	0.252842
20120514C1	D07	Tocris	2288	10	B04	CM003RL110	D	7	1.99131	-0.737008
20120514C1	D08	Tocris	2709	12	B04	CM003RL110	D	8	1.94322	-1.0106
20120514C1	D09	Tocris	2291	10	B05	CM003RL110	D	9	1.23574	0.212879
20120514C1	D10	Tocris	2718	12	B05	CM003RL110	D	10	2.54425	-0.432675
20120514C1	D11	Tocris	2292	10	B06	CM003RL110	D	11	2.46182	-0.715489
20120514C1	D12	Tocris	2719	12	B06	CM003RL110	D	12	1.19453	0.00691665
20120514C1	D13	Tocris	2293	10	B07	CM003RL110	D	13	3.25173	0.418842
20120514C1	D14	Tocris	2725	12	B07	CM003RL110	D	14	0.050872	-1.12127
20120514C1	D15	Tocris	2294	10	B08	CM003RL110	D	15	0.706842	-0.875341
20120514C1	D16	Tocris	2731	12	B08	CM003RL110	D	16	0.617548	-1.26575
20120514C1	D17	Tocris	2295	10	B09	CM003RL110	D	17	2.69192	0.292805
20120514C1	D18	Tocris	2737	12	B09	CM003RL110	D	18	1.5414	0.0591758
20120514C1	D19	Tocris	2296	10	B10	CM003RL110	D	19	0.881996	-0.395786
20120514C1	D20	Tocris	2742	12	B10	CM003RL110	D	20	16.7386	12.5583
20120514C1	D21	Tocris	2301	10	B11	CM003RL110	D	21	0.112691	-1.88363
20120514C1	D22	Tocris	2743	12	B11	CM003RL110	D	22	1.13614	-0.8446
20120514C1	E03	Tocris	2025	9	C02	CM003RL110	E	3	1.63413	-0.992155
20120514C1	E04	Tocris	2514	11	C02	CM003RL110	E	4	-1.10652	-1.15508
20120514C1	E05	Tocris	2037	9	C03	CM003RL110	E	5	-0.0384223	-1.28419
20120514C1	E06	Tocris	2517	11	C03	CM003RL110	E	6	-2.67604	-2.20641
20120514C1	E07	Tocris	2072	9	C04	CM003RL110	E	7	-1.34693	-1.15816
20120514C1	E08	Tocris	2520	11	C04	CM003RL110	E	8	-1.12369	-1.0936
20120514C1	E09	Tocris	2078	9	C05	CM003RL110	E	9	-0.0555943	-0.684749
20120514C1	E10	Tocris	2524	11	C05	CM003RL110	E	10	0.147035	-0.527971
20120514C1	E11	Tocris	2079	9	C06	CM003RL110	E	11	-0.275396	-0.558712
20120514C1	E12	Tocris	2531	11	C06	CM003RL110	E	12	1.13958	-1.47478
20120514C1	E13	Tocris	2086	9	C07	CM003RL110	E	13	-1.5839	-0.269749
20120514C1	E14	Tocris	2533	11	C07	CM003RL110	E	14	0.00965924	-0.205194
20120514C1	E15	Tocris	2088	9	C08	CM003RL110	E	15	-0.10711	-0.524897
20120514C1	E16	Tocris	2536	11	C08	CM003RL110	E	16	-0.65318	-1.45327
20120514C1	E17	Tocris	2089	9	C09	CM003RL110	E	17	-1.29198	-0.143713
20120514C1	E18	Tocris	2539	11	C09	CM003RL110	E	18	-14.2465	-7.05114
20120514C1	E19	Tocris	2095	9	C10	CM003RL110	E	19	-1.12026	0.587916
20120514C1	E20	Tocris	2542	11	C10	CM003RL110	E	20	-1.45339	1.08591
20120514C1	E21	Tocris	2096	9	C11	CM003RL110	E	21	-0.182667	-0.614045
20120514C1	E22	Tocris	2545	11	C11	CM003RL110	E	22	1.27008	-0.0853054
20120514C1	F03	Tocris	2303	10	C02	CM003RL110	F	3	2.66788	0.0653239
20120514C1	F04	Tocris	2747	12	C02	CM003RL110	F	4	-2.64513	-3.23008
20120514C1	F05	Tocris	2308	10	C03	CM003RL110	F	5	1.58605	-0.066861
20120514C1	F06	Tocris	2748	12	C03	CM003RL110	F	6	2.25919	2.18336
20120514C1	F07	Tocris	2310	10	C04	CM003RL110	F	7	2.56828	1.47017
20120514C1	F08	Tocris	2755	12	C04	CM003RL110	F	8	0.483606	-0.906081
20120514C1	F09	Tocris	2311	10	C05	CM003RL110	F	9	-1.99259	0.231324
20120514C1	F10	Tocris	2764	12	C05	CM003RL110	F	10	1.11553	-0.205194
20120514C1	F11	Tocris	2312	10	C06	CM003RL110	F	11	1.37655	-0.414231
20120514C1	F12	Tocris	2768	12	C06	CM003RL110	F	12	-2.47684	-5.33889
20120514C1	F13	Tocris	2313	10	C07	CM003RL110	F	13	1.17049	-0.776971
20120514C1	F14	Tocris	2777	12	C07	CM003RL110	F	14	0.566032	-0.491082
20120514C1	F15	Tocris	2315	10	C08	CM003RL110	F	15	-0.392165	-0.0545647
20120514C1	F16	Tocris	2814	12	C08	CM003RL110	F	16	-1.83118	-0.0545647
20120514C1	F17	Tocris	2316	10	C09	CM003RL110	F	17	-1.39501	-0.294342
20120514C1	F18	Tocris	2902	12	C09	CM003RL110	F	18	1.76464	0.375805
20120514C1	F19	Tocris	2318	10	C10	CM003RL110	F	19	-0.670351	-0.365046
20120514C1	F20	Tocris	2908	12	C10	CM003RL110	F	20	-1.77966	-1.28727
20120514C1	F21	Tocris	2322	10	C11	CM003RL110	F	21	0.0268312	-0.46649
20120514C1	F22	Tocris	2926	12	C11	CM003RL110	F	22	3.82184	1.97432
20120514C1	G03	Tocris	2097	9	D02	CM003RL110	G	3	-2.5627	-1.33645
20120514C1	G04	Tocris	2554	11	D02	CM003RL110	G	4	-0.519238	-0.540267
20120514C1	G05	Tocris	2098	9	D03	CM003RL110	G	5	-1.69724	-0.712415
20120514C1	G06	Tocris	2558	11	D03	CM003RL110	G	6	-9.76807	-5.053
20120514C1	G07	Tocris	2132	9	D04	CM003RL110	G	7	-0.831768	0.0714721
20120514C1	G08	Tocris	2560	11	D04	CM003RL110	G	8	203.621	185.158
20120514C1	G09	Tocris	2137	9	D05	CM003RL110	G	9	-1.86209	0.0653239
20120514C1	G10	Tocris	2563	11	D05	CM003RL110	G	10	-0.972579	-0.405008
20120514C1	G11	Tocris	2139	9	D06	CM003RL110	G	11	-0.735605	-0.693971
20120514C1	G12	Tocris	2571	11	D06	CM003RL110	G	12	-2.64513	-1.26882
20120514C1	G13	Tocris	2141	9	D07	CM003RL110	G	13	-1.60451	-0.248231
20120514C1	G14	Tocris	2574	11	D07	CM003RL110	G	14	-1.67663	-1.21964
20120514C1	G15	Tocris	2143	9	D08	CM003RL110	G	15	-0.986316	-0.245157
20120514C1	G16	Tocris	2577	11	D08	CM003RL110	G	16	-0.326912	0.541804
20120514C1	G17	Tocris	2147	9	D09	CM003RL110	G	17	0.497344	-0.9276
20120514C1	G18	Tocris	2578	11	D09	CM003RL110	G	18	-0.0658975	1.03058
20120514C1	G19	Tocris	2148	9	D10	CM003RL110	G	19	0.998766	1.75606
20120514C1	G20	Tocris	2579	11	D10	CM003RL110	G	20	-1.20612	8.12553
20120514C1	G21	Tocris	2150	9	D11	CM003RL110	G	21	1.56201	0.415768
20120514C1	G22	Tocris	2580	11	D11	CM003RL110	G	22	0.754923	0.0714721
20120514C1	H03	Tocris	2324	10	D02	CM003RL110	H	3	1.30786	-2.08038
20120514C1	H04	Tocris	2938	12	D02	CM003RL110	H	4	0.971291	0.154472
20120514C1	H05	Tocris	2329	10	D03	CM003RL110	H	5	0.435525	0.701656
20120514C1	H06	Tocris	2977	12	D03	CM003RL110	H	6	-2.8615	-1.37027
20120514C1	H07	Tocris	2330	10	D04	CM003RL110	H	7	0.868259	-0.0484166
20120514C1	H08	Tocris	3000	12	D04	CM003RL110	H	8	-1.75562	-1.03519
20120514C1	H09	Tocris	2333	10	D05	CM003RL110	H	9	-0.811162	-0.706267
20120514C1	H10	Tocris	3037	12	D05	CM003RL110	H	10	113.183	110.055
20120514C1	H11	Tocris	2337	10	D06	CM003RL110	H	11	-1.03783	-0.604823
20120514C1	H12	Tocris	2910	12	D06	CM003RL110	H	12	-1.12713	-1.59467
20120514C1	H13	Tocris	2339	10	D07	CM003RL110	H	13	-1.32976	0.246694
20120514C1	H14	Tocris	3063	12	D07	CM003RL110	H	14	-1.74875	-1.06593
20120514C1	H15	Tocris	2342	10	D08	CM003RL110	H	15	-3.14999	-0.813859
20120514C1	H16	Tocris	3194	12	D08	CM003RL110	H	16	-6.63933	-4.24759
20120514C1	H17	Tocris	2344	10	D09	CM003RL110	H	17	-0.831768	0.0192129
20120514C1	H18	Tocris	3269	12	D09	CM003RL110	H	18	-6.92782	-2.4923
20120514C1	H19	Tocris	2345	10	D10	CM003RL110	H	19	-0.574188	-0.337379
20120514C1	H20	Tocris	3271	12	D10	CM003RL110	H	20	-0.969144	-0.58023
20120514C1	H21	Tocris	2347	10	D11	CM003RL110	H	21	-0.326912	-0.171379
20120514C1	H22	Tocris	3314	12	D11	CM003RL110	H	22	-0.690958	-0.205194
20120514C1	I03	Tocris	2151	9	E02	CM003RL110	I	3	-2.26391	-1.53012
20120514C1	I04	Tocris	2581	11	E02	CM003RL110	I	4	-1.77279	0.185213
20120514C1	I05	Tocris	2152	9	E03	CM003RL110	I	5	-2.27765	-2.10189
20120514C1	I06	Tocris	2582	11	E03	CM003RL110	I	6	-1.00349	-0.45112
20120514C1	I07	Tocris	2154	9	E04	CM003RL110	I	7	-1.86896	0.0315092
20120514C1	I08	Tocris	2583	11	E04	CM003RL110	I	8	-1.63198	-0.463416
20120514C1	I09	Tocris	2155	9	E05	CM003RL110	I	9	-3.92959	-1.44404
20120514C1	I10	Tocris	2586	11	E05	CM003RL110	I	10	-3.39383	-0.583304
20120514C1	I11	Tocris	2156	9	E06	CM003RL110	I	11	-1.35036	-1.74838
20120514C1	I12	Tocris	2591	11	E06	CM003RL110	I	12	-1.7934	-0.174453
20120514C1	I13	Tocris	2160	9	E07	CM003RL110	I	13	-8.31189	-4.17382
20120514C1	I14	Tocris	2596	11	E07	CM003RL110	I	14	-1.25763	-0.162157
20120514C1	I15	Tocris	2161	9	E08	CM003RL110	I	15	-15.0708	-7.64136
20120514C1	I16	Tocris	2600	11	E08	CM003RL110	I	16	-1.8037	-1.04134
20120514C1	I17	Tocris	2162	9	E09	CM003RL110	I	17	-2.5421	-0.740082
20120514C1	I18	Tocris	2605	11	E09	CM003RL110	I	18	-0.701261	-0.30049
20120514C1	I19	Tocris	2172	9	E10	CM003RL110	I	19	-1.63198	-0.930674
20120514C1	I20	Tocris	2609	11	E10	CM003RL110	I	20	18.2394	11.7529
20120514C1	I21	Tocris	2173	9	E11	CM003RL110	I	21	-0.931366	-0.395786
20120514C1	I22	Tocris	2611	11	E11	CM003RL110	I	22	-2.19522	0.959878
20120514C1	J03	Tocris	2348	10	E02	CM003RL110	J	3	0.373705	-0.288194
20120514C1	J04	Tocris	3318	12	E02	CM003RL110	J	4	-0.471156	-0.527971
20120514C1	J05	Tocris	2372	10	E03	CM003RL110	J	5	-1.52552	0.280509
20120514C1	J06	Tocris	3335	12	E03	CM003RL110	J	6	29.9027	33.7756
20120514C1	J07	Tocris	2373	10	E04	CM003RL110	J	7	-1.43966	-1.13664
20120514C1	J08	Tocris	3336	12	E04	CM003RL110	J	8	-0.70813	0.163694
20120514C1	J09	Tocris	2374	10	E05	CM003RL110	J	9	-2.80998	-0.242083
20120514C1	J10	Tocris	3341	12	E05	CM003RL110	J	10	-1.44653	-0.607897
20120514C1	J11	Tocris	2382	10	E06	CM003RL110	J	11	-2.39099	-0.374268
20120514C1	J12	Tocris	3342	12	E06	CM003RL110	J	12	0.816743	0.391175
20120514C1	J13	Tocris	2385	10	E07	CM003RL110	J	13	-1.75562	0.136027
20120514C1	J14	Tocris	3344	12	E07	CM003RL110	J	14	-2.10936	-0.91223
20120514C1	J15	Tocris	2386	10	E08	CM003RL110	J	15	-1.11339	-0.789267
20120514C1	J16	Tocris	3347	12	E08	CM003RL110	J	16	-2.3429	-1.26882
20120514C1	J17	Tocris	2390	10	E09	CM003RL110	J	17	-2.07159	-1.27497
20120514C1	J18	Tocris	3350	12	E09	CM003RL110	J	18	-1.4843	0.520286
20120514C1	J19	Tocris	2392	10	E10	CM003RL110	J	19	-2.64513	1.12588
20120514C1	J20	Tocris	3353	12	E10	CM003RL110	J	20	-2.1231	-0.432675
20120514C1	J21	Tocris	2394	10	E11	CM003RL110	J	21	-3.01261	0.0530277
20120514C1	J22	Tocris	3360	12	E11	CM003RL110	J	22	7.80574	7.93801
20120514C1	K03	Tocris	2175	9	F02	CM003RL110	K	3	-1.23016	0.302027
20120514C1	K04	Tocris	2615	11	F02	CM003RL110	K	4	1.52766	3.34228
20120514C1	K05	Tocris	2176	9	F03	CM003RL110	K	5	34.3983	38.2299
20120514C1	K06	Tocris	2623	11	F03	CM003RL110	K	6	-2.06815	0.286657
20120514C1	K07	Tocris	2183	9	F04	CM003RL110	K	7	-4.19061	0.584841
20120514C1	K08	Tocris	2624	11	F04	CM003RL110	K	8	-0.859243	0.169842
20120514C1	K09	Tocris	2184	9	F05	CM003RL110	K	9	-1.67663	-0.30049
20120514C1	K10	Tocris	2625	11	F05	CM003RL110	K	10	-1.57703	0.455731
20120514C1	K11	Tocris	2186	9	F06	CM003RL110	K	11	-2.84432	-0.131416
20120514C1	K12	Tocris	2626	11	F06	CM003RL110	K	12	-1.93077	0.0376573
20120514C1	K13	Tocris	2190	9	F07	CM003RL110	K	13	-0.646311	0.225176
20120514C1	K14	Tocris	2629	11	F07	CM003RL110	K	14	-2.95079	0.151398
20120514C1	K15	Tocris	2191	9	F08	CM003RL110	K	15	0.799571	1.11973
20120514C1	K16	Tocris	2633	11	F08	CM003RL110	K	16	-0.776818	0.295879
20120514C1	K17	Tocris	2192	9	F09	CM003RL110	K	17	-1.52552	-0.635563
20120514C1	K18	Tocris	2634	11	F09	CM003RL110	K	18	-0.646311	0.323546
20120514C1	K19	Tocris	2193	9	F10	CM003RL110	K	19	-0.374993	-0.02075
20120514C1	K20	Tocris	2635	11	F10	CM003RL110	K	20	-1.84492	-0.248231
20120514C1	K21	Tocris	2194	9	F11	CM003RL110	K	21	-1.81057	0.833841
20120514C1	K22	Tocris	2638	11	F11	CM003RL110	K	22	-2.30512	-0.306638
20120514C1	L03	Tocris	2395	10	F02	CM003RL110	L	3	-1.21985	-0.773897
20120514C1	L04	Tocris	3361	12	F02	CM003RL110	L	4	-1.24733	0.526434
20120514C1	L05	Tocris	2396	10	F03	CM003RL110	L	5	-0.306305	-0.448045
20120514C1	L06	Tocris	3362	12	F03	CM003RL110	L	6	0.311886	-0.306638
20120514C1	L07	Tocris	2397	10	F04	CM003RL110	L	7	0.068044	0.760063
20120514C1	L08	Tocris	3366	12	F04	CM003RL110	L	8	-1.20268	-0.174453
20120514C1	L09	Tocris	2398	10	F05	CM003RL110	L	9	-3.83	-1.04442
20120514C1	L10	Tocris	3367	12	F05	CM003RL110	L	10	1.76464	1.2181
20120514C1	L11	Tocris	2400	10	F06	CM003RL110	L	11	-2.07502	-0.488008
20120514C1	L12	Tocris	3370	12	F06	CM003RL110	L	12	-1.01723	0.883026
20120514C1	L13	Tocris	2404	10	F07	CM003RL110	L	13	-1.89987	0.311249
20120514C1	L14	Tocris	3387	12	F07	CM003RL110	L	14	-1.86552	-0.420379
20120514C1	L15	Tocris	2408	10	F08	CM003RL110	L	15	-20.0575	-7.54914
20120514C1	L16	Tocris	3397	12	F08	CM003RL110	L	16	-0.673786	0.471101
20120514C1	L17	Tocris	2415	10	F09	CM003RL110	L	17	-0.546713	0.655545
20120514C1	L18	Tocris	3411	12	F09	CM003RL110	L	18	-1.75219	-0.733934
20120514C1	L19	Tocris	2416	10	F10	CM003RL110	L	19	-11.1315	-4.18304
20120514C1	L20	Tocris	3427	12	F10	CM003RL110	L	20	-0.67722	0.372731
20120514C1	L21	Tocris	2417	10	F11	CM003RL110	L	21	-10.0978	-4.223
20120514C1	L22	Tocris	3429	12	F11	CM003RL110	L	22	-1.20612	0.944507
20120514C1	M03	Tocris	2195	9	G02	CM003RL110	M	3	-3.6102	-0.743156
20120514C1	M04	Tocris	2639	11	G02	CM003RL110	M	4	-3.91242	-1.27804
20120514C1	M05	Tocris	2196	9	G03	CM003RL110	M	5	-2.61422	-0.38349
20120514C1	M06	Tocris	2641	11	G03	CM003RL110	M	6	-4.13222	-0.358897
20120514C1	M07	Tocris	2197	9	G04	CM003RL110	M	7	-6.46762	-3.29463
20120514C1	M08	Tocris	2642	11	G04	CM003RL110	M	8	-3.67888	0.839989
20120514C1	M09	Tocris	2198	9	G05	CM003RL110	M	9	-4.23869	-1.71764
20120514C1	M10	Tocris	2645	11	G05	CM003RL110	M	10	-5.36174	-1.41945
20120514C1	M11	Tocris	2199	9	G06	CM003RL110	M	11	-8.60724	-4.69641
20120514C1	M12	Tocris	2647	11	G06	CM003RL110	M	12	-1.98573	-0.312786
20120514C1	M13	Tocris	2200	9	G07	CM003RL110	M	13	-4.34516	-1.72686
20120514C1	M14	Tocris	2649	11	G07	CM003RL110	M	14	-4.93587	-0.171379
20120514C1	M15	Tocris	2201	9	G08	CM003RL110	M	15	-4.37607	-0.469564
20120514C1	M16	Tocris	2651	11	G08	CM003RL110	M	16	-5.50255	-0.527971
20120514C1	M17	Tocris	2202	9	G09	CM003RL110	M	17	-2.22957	-0.18675
20120514C1	M18	Tocris	2652	11	G09	CM003RL110	M	18	-1.98916	-0.165231
20120514C1	M19	Tocris	3869	9	G10	CM003RL110	M	19	-5.3377	-1.1889
20120514C1	M20	Tocris	2653	11	G10	CM003RL110	M	20	-3.17746	-0.0791572
20120514C1	M21	Tocris	2208	9	G11	CM003RL110	M	21	-3.00231	-0.199046
20120514C1	M22	Tocris	2654	11	G11	CM003RL110	M	22	-1.67663	-0.325083
20120514C1	N03	Tocris	2418	10	G02	CM003RL110	N	3	-1.61481	0.95373
20120514C1	N04	Tocris	3430	12	G02	CM003RL110	N	4	0.521385	0.105287
20120514C1	N05	Tocris	2421	10	G03	CM003RL110	N	5	-2.78251	-0.979859
20120514C1	N06	Tocris	3433	12	G03	CM003RL110	N	6	-3.15342	-0.0883794
20120514C1	N07	Tocris	2429	10	G04	CM003RL110	N	7	-0.471156	0.646323
20120514C1	N08	Tocris	3439	12	G04	CM003RL110	N	8	-1.5633	0.197509
20120514C1	N09	Tocris	2435	10	G05	CM003RL110	N	9	-2.42876	0.0468795
20120514C1	N10	Tocris	3440	12	G05	CM003RL110	N	10	-1.96512	-0.152935
20120514C1	N11	Tocris	2436	10	G06	CM003RL110	N	11	-0.467722	0.744693
20120514C1	N12	Tocris	3489	12	G06	CM003RL110	N	12	-4.54779	-1.94819
20120514C1	N13	Tocris	2438	10	G07	CM003RL110	N	13	-2.7516	-0.377342
20120514C1	N14	Tocris	3495	12	G07	CM003RL110	N	14	-3.11221	-0.417305
20120514C1	N15	Tocris	2441	10	G08	CM003RL110	N	15	-3.52777	-1.20427
20120514C1	N16	Tocris	3517	12	G08	CM003RL110	N	16	-3.31827	-1.51475
20120514C1	N17	Tocris	2442	10	G09	CM003RL110	N	17	2.05999	5.5925
20120514C1	N18	Tocris	3521	12	G09	CM003RL110	N	18	1.50706	0.922989
20120514C1	N19	Tocris	2447	10	G10	CM003RL110	N	19	-3.73383	-0.515675
20120514C1	N20	Tocris	3523	12	G10	CM003RL110	N	20	-3.34231	-0.444971
20120514C1	N21	Tocris	2448	10	G11	CM003RL110	N	21	-2.76533	0.255916
20120514C1	N22	Tocris	3532	12	G11	CM003RL110	N	22	-1.71097	0.194435
20120514C1	O03	Tocris	2213	9	H02	CM003RL110	O	3	-1.96512	1.59621
20120514C1	O04	Tocris	2655	11	H02	CM003RL110	O	4	-0.134585	1.15354
20120514C1	O05	Tocris	2214	9	H03	CM003RL110	O	5	0.280977	0.852285
20120514C1	O06	Tocris	2657	11	H03	CM003RL110	O	6	-1.37784	1.00292
20120514C1	O07	Tocris	2227	9	H04	CM003RL110	O	7	-0.969144	0.44036
20120514C1	O08	Tocris	2661	11	H04	CM003RL110	O	8	-1.80714	0.557175
20120514C1	O09	Tocris	2229	9	H05	CM003RL110	O	9	2.55798	1.43943
20120514C1	O10	Tocris	2662	11	H05	CM003RL110	O	10	-3.68575	-1.05056
20120514C1	O11	Tocris	2237	9	H06	CM003RL110	O	11	-1.13743	-0.242083
20120514C1	O12	Tocris	2665	11	H06	CM003RL110	O	12	-2.0235	-0.226713
20120514C1	O13	Tocris	2238	9	H07	CM003RL110	O	13	10.0999	12.1987
20120514C1	O14	Tocris	2668	11	H07	CM003RL110	O	14	-2.97483	-0.561786
20120514C1	O15	Tocris	2241	9	H08	CM003RL110	O	15	11.7965	13.7511
20120514C1	O16	Tocris	2669	11	H08	CM003RL110	O	16	-2.18836	0.692434
20120514C1	O17	Tocris	2242	9	H09	CM003RL110	O	17	-3.60676	0.391175
20120514C1	O18	Tocris	2671	11	H09	CM003RL110	O	18	-2.85119	0.317397
20120514C1	O19	Tocris	2252	9	H10	CM003RL110	O	19	200.984	195.942
20120514C1	O20	Tocris	2673	11	H10	CM003RL110	O	20	-3.99485	-0.0268981
20120514C1	O21	Tocris	2254	9	H11	CM003RL110	O	21	-7.37773	-1.39793
20120514C1	O22	Tocris	2676	11	H11	CM003RL110	O	22	-5.50255	-1.51475
20120514C1	P03	Tocris	2451	10	H02	CM003RL110	P	3	-1.69724	0.569471
20120514C1	P04	Tocris	3534	12	H02	CM003RL110	P	4	0.768661	1.56547
20120514C1	P05	Tocris	2452	10	H03	CM003RL110	P	5	0.665629	1.15354
20120514C1	P06	Tocris	3540	12	H03	CM003RL110	P	6	-1.93077	0.858433
20120514C1	P07	Tocris	2456	10	H04	CM003RL110	P	7	-0.629139	0.6371
20120514C1	P08	Tocris	3543	12	H04	CM003RL110	P	8	-1.84835	1.12895
20120514C1	P09	Tocris	2457	10	H05	CM003RL110	P	9	38.3169	34.541
20120514C1	P10	Tocris	3544	12	H05	CM003RL110	P	10	-1.48774	1.19043
20120514C1	P11	Tocris	2458	10	H06	CM003RL110	P	11	-7.30217	-2.28326
20120514C1	P12	Tocris	3547	12	H06	CM003RL110	P	12	-1.7831	1.3718
20120514C1	P13	Tocris	2460	10	H07	CM003RL110	P	13	-1.43622	0.486471
20120514C1	P14	Tocris	3550	12	H07	CM003RL110	P	14	-1.64915	0.206731
20120514C1	P15	Tocris	2465	10	H08	CM003RL110	P	15	-2.77907	-0.278972
20120514C1	P16	Tocris	3551	12	H08	CM003RL110	P	16	-2.76533	0.698582
20120514C1	P17	Tocris	2466	10	H09	CM003RL110	P	17	-2.13684	0.338916
20120514C1	P18	Tocris	3568	12	H09	CM003RL110	P	18	-2.28452	-0.0576388
20120514C1	P19	Tocris	2467	10	H10	CM003RL110	P	19	-3.29423	0.6371
20120514C1	P20	Tocris	3571	12	H10	CM003RL110	P	20	-2.17118	0.00691665
20120514C1	P21	Tocris	2469	10	H11	CM003RL110	P	21	-1.99946	0.529508
20120514C1	P22	Tocris	3572	12	H11	CM003RL110	P	22	1.40746	8.4606
20120514D1	A03	Tocris	3575	13	A02	CM004RL110	A	3	-0.650495	-1.76443
20120514D1	A04					CM004RL110	A	4	1.7788	0.631468
20120514D1	A05	Tocris	3576	13	A03	CM004RL110	A	5	0.921204	0.628336
20120514D1	A06					CM004RL110	A	6	-0.777299	0.418499
20120514D1	A07	Tocris	3577	13	A04	CM004RL110	A	7	1.44844	-0.417716
20120514D1	A08					CM004RL110	A	8	0.317218	0.136629
20120514D1	A09	Tocris	3579	13	A05	CM004RL110	A	9	-1.19775	1.10125
20120514D1	A10					CM004RL110	A	10	1.26825	-0.239198
20120514D1	A11	Tocris	3586	13	A06	CM004RL110	A	11	-0.330149	-0.389529
20120514D1	A12					CM004RL110	A	12	-0.256736	-1.113
20120514D1	A13	Tocris	3589	13	A07	CM004RL110	A	13	1.19483	1.12631
20120514D1	A14					CM004RL110	A	14	-0.0631933	-0.849918
20120514D1	A15	Tocris	3595	13	A08	CM004RL110	A	15	1.25823	-0.427112
20120514D1	A16					CM004RL110	A	16	0.313881	0.358993
20120514D1	A17	Tocris	3596	13	A09	CM004RL110	A	17	0.814422	-1.06602
20120514D1	A18					CM004RL110	A	18	-0.0565194	-0.568047
20120514D1	A19	Tocris	3597	13	A10	CM004RL110	A	19	0.0769582	0.45295
20120514D1	A20					CM004RL110	A	20	0.557478	-0.865577
20120514D1	A21	Tocris	3599	13	A11	CM004RL110	A	21	-0.0131392	-0.662004
20120514D1	A22					CM004RL110	A	22	-1.05093	-0.846786
20120514D1	B03	Tocris	3703	14	A02	CM004RL110	B	3	0.320555	0.806854
20120514D1	B04					CM004RL110	B	4	0.730999	-0.267385
20120514D1	B05	Tocris	3706	14	A03	CM004RL110	B	5	-0.730582	0.593885
20120514D1	B06					CM004RL110	B	6	11.0555	0.255641
20120514D1	B07	Tocris	3707	14	A04	CM004RL110	B	7	1.68536	0.471742
20120514D1	B08					CM004RL110	B	8	1.28159	0.102178
20120514D1	B09	Tocris	3718	14	A05	CM004RL110	B	9	-0.613789	-0.405189
20120514D1	B10					CM004RL110	B	10	0.627553	0.014485
20120514D1	B11	Tocris	3724	14	A06	CM004RL110	B	11	1.52853	0.562566
20120514D1	B12					CM004RL110	B	12	1.95566	0.0176169
20120514D1	B13	Tocris	3733	14	A07	CM004RL110	B	13	-0.71056	-0.705851
20120514D1	B14					CM004RL110	B	14	0.297196	-0.201616
20120514D1	B15	Tocris	3734	14	A08	CM004RL110	B	15	0.791064	-0.433376
20120514D1	B16					CM004RL110	B	16	1.27492	-0.950138
20120514D1	B17	Tocris	3736	14	A09	CM004RL110	B	17	-0.413572	-0.414585
20120514D1	B18					CM004RL110	B	18	-0.313464	0.333938
20120514D1	B19	Tocris	3737	14	A10	CM004RL110	B	19	0.30387	-1.13492
20120514D1	B20					CM004RL110	B	20	0.727662	0.0426721
20120514D1	B21	Tocris	3743	14	A11	CM004RL110	B	21	0.0569366	-1.24767
20120514D1	B22					CM004RL110	B	22	0.761031	-0.608762
20120514D1	C03	Tocris	3603	13	B02	CM004RL110	C	3	-0.660506	-1.01904
20120514D1	C04					CM004RL110	C	4	-1.53478	0.102178
20120514D1	C05	Tocris	3605	13	B03	CM004RL110	C	5	-0.326812	-0.997117
20120514D1	C06					CM004RL110	C	6	-0.113247	1.21087
20120514D1	C07	Tocris	3607	13	B04	CM004RL110	C	7	1.01798	-1.44811
20120514D1	C08					CM004RL110	C	8	0.410652	-0.890632
20120514D1	C09	Tocris	3609	13	B05	CM004RL110	C	9	0.090306	-1.26646
20120514D1	C10					CM004RL110	C	10	0.430674	-0.286177
20120514D1	C11	Tocris	3610	13	B06	CM004RL110	C	11	-0.583756	-1.01278
20120514D1	C12					CM004RL110	C	12	0.220447	-0.445904
20120514D1	C13	Tocris	3617	13	B07	CM004RL110	C	13	0.861139	-0.486618
20120514D1	C14					CM004RL110	C	14	0.0936429	0.371521
20120514D1	C15	Tocris	3620	13	B08	CM004RL110	C	15	-0.476974	-1.21322
20120514D1	C16					CM004RL110	C	16	-0.520354	-0.226671
20120514D1	C17	Tocris	3622	13	B09	CM004RL110	C	17	0.233794	-1.50135
20120514D1	C18					CM004RL110	C	18	-0.733919	-0.790412
20120514D1	C19	Tocris	3634	13	B10	CM004RL110	C	19	-0.35017	-0.355079
20120514D1	C20					CM004RL110	C	20	0.704303	-2.28432
20120514D1	C21	Tocris	3639	13	B11	CM004RL110	C	21	-0.390214	-0.367606
20120514D1	C22					CM004RL110	C	22	-0.396888	-1.5358
20120514D1	D03	Tocris	3745	14	B02	CM004RL110	D	3	1.45511	-0.511673
20120514D1	D04					CM004RL110	D	4	0.680945	-0.107659
20120514D1	D05	Tocris	3746	14	B03	CM004RL110	D	5	2.55631	-1.15997
20120514D1	D06					CM004RL110	D	6	0.967922	1.06367
20120514D1	D07	Tocris	3748	14	B04	CM004RL110	D	7	0.627553	0.741085
20120514D1	D08					CM004RL110	D	8	0.704303	-0.223539
20120514D1	D09	Tocris	3805	14	B05	CM004RL110	D	9	-0.0565194	0.0959143
20120514D1	D10					CM004RL110	D	10	0.310544	-1.32597
20120514D1	D11	Tocris	3837	14	B06	CM004RL110	D	11	0.984606	-1.09734
20120514D1	D12					CM004RL110	D	12	-1.10766	-1.09734
20120514D1	D13	Tocris	3851	14	B07	CM004RL110	D	13	1.65533	-0.796676
20120514D1	D14					CM004RL110	D	14	-0.153291	-1.16311
20120514D1	D15	Tocris	3852	14	B08	CM004RL110	D	15	-0.083215	-1.22261
20120514D1	D16					CM004RL110	D	16	-0.14328	-0.43964
20120514D1	D17	Tocris	0109	14	B09	CM004RL110	D	17	0.340577	-1.21635
20120514D1	D18					CM004RL110	D	18	-0.717234	-0.273649
20120514D1	D19	Tocris	0130	14	B10	CM004RL110	D	19	-1.11099	-1.09421
20120514D1	D20					CM004RL110	D	20	1.19817	-0.189088
20120514D1	D21	Tocris	0131	14	B11	CM004RL110	D	21	0.924541	-0.984589
20120514D1	D22					CM004RL110	D	22	-0.847375	-1.15371
20120514D1	E03	Tocris	3642	13	C02	CM004RL110	E	3	-2.29561	-2.1935
20120514D1	E04					CM004RL110	E	4	-2.40239	-1.12553
20120514D1	E05	Tocris	3650	13	C03	CM004RL110	E	5	-1.68161	-2.20603
20120514D1	E06					CM004RL110	E	6	-2.89626	-1.58278
20120514D1	E07	Tocris	3656	13	C04	CM004RL110	E	7	-2.7828	-1.49822
20120514D1	E08					CM004RL110	E	8	-2.5926	-1.53267
20120514D1	E09	Tocris	3657	13	C05	CM004RL110	E	9	-0.800657	-1.01904
20120514D1	E10					CM004RL110	E	10	-0.947483	-0.96893
20120514D1	E11	Tocris	3661	13	C06	CM004RL110	E	11	-0.129932	-0.618158
20120514D1	E12					CM004RL110	E	12	-1.1744	0.10531
20120514D1	E13	Tocris	3670	13	C07	CM004RL110	E	13	-0.557061	-1.76443
20120514D1	E14					CM004RL110	E	14	-1.07762	-0.502278
20120514D1	E15	Tocris	3677	13	C08	CM004RL110	E	15	-0.907439	-1.20382
20120514D1	E16					CM004RL110	E	16	-0.0965627	-0.0387572
20120514D1	E17	Tocris	3678	13	C09	CM004RL110	E	17	1.89225	-1.15997
20120514D1	E18					CM004RL110	E	18	-0.864059	-0.768489
20120514D1	E19	Tocris	3679	13	C10	CM004RL110	E	19	-0.907439	-0.765357
20120514D1	E20					CM004RL110	E	20	-1.71164	-0.65574
20120514D1	E21	Tocris	3683	13	C11	CM004RL110	E	21	-0.0631933	-1.28212
20120514D1	E22					CM004RL110	E	22	-0.59043	-0.013702
20120514D1	F03	Tocris	0285	14	C02	CM004RL110	F	3	0.781053	0.180475
20120514D1	F04					CM004RL110	F	4	-0.156628	0.728557
20120514D1	F05	Tocris	0289	14	C03	CM004RL110	F	5	1.18149	-0.0606804
20120514D1	F06					CM004RL110	F	6	-0.0765411	-0.0105701
20120514D1	F07	Tocris	0388	14	C04	CM004RL110	F	7	-0.530365	-3.39302
20120514D1	F08					CM004RL110	F	8	0.831107	-0.37387
20120514D1	F09	Tocris	0444	14	C05	CM004RL110	F	9	-1.39797	0.146025
20120514D1	F10					CM004RL110	F	10	-0.026487	-1.18816
20120514D1	F11	Tocris	0462	14	C06	CM004RL110	F	11	-1.30454	0.0802548
20120514D1	F12					CM004RL110	F	12	-0.420246	-1.05976
20120514D1	F13	Tocris	0508	14	C07	CM004RL110	F	13	0.704303	-0.95327
20120514D1	F14					CM004RL110	F	14	-0.303453	-0.693323
20120514D1	F15	Tocris	0549	14	C08	CM004RL110	F	15	0.127012	0.0708591
20120514D1	F16					CM004RL110	F	16	-0.166638	-0.690191
20120514D1	F17	Tocris	0622	14	C09	CM004RL110	F	17	0.494076	-0.364474
20120514D1	F18					CM004RL110	F	18	-0.376866	-0.674532
20120514D1	F19	Tocris	0652	14	C10	CM004RL110	F	19	-1.85513	0.014485
20120514D1	F20					CM004RL110	F	20	-0.770625	-1.17563
20120514D1	F21	Tocris	0686	14	C11	CM004RL110	F	21	0.18374	-1.20695
20120514D1	F22					CM004RL110	F	22	-0.557061	-0.336287
20120514D1	G03	Tocris	3690	13	D02	CM004RL110	G	3	-1.7984	-1.27899
20120514D1	G04					CM004RL110	G	4	-1.52477	-1.05349
20120514D1	G05	Tocris	3692	13	D03	CM004RL110	G	5	-1.94523	-0.339419
20120514D1	G06					CM004RL110	G	6	-1.62488	-0.204748
20120514D1	G07	Tocris	3701	13	D04	CM004RL110	G	7	-2.03866	-0.818599
20120514D1	G08					CM004RL110	G	8	-3.06978	-0.53986
20120514D1	G09	Tocris	0190	13	D05	CM004RL110	G	9	-0.957494	-1.18503
20120514D1	G10					CM004RL110	G	10	-1.44802	0.214926
20120514D1	G11	Tocris	0414	13	D06	CM004RL110	G	11	-1.01422	1.26098
20120514D1	G12					CM004RL110	G	12	-1.93188	-1.06915
20120514D1	G13					CM004RL110	G	13	-0.907439	0.809986
20120514D1	G14					CM004RL110	G	14	-1.83177	-1.03783
20120514D1	G15	Tocris	0493	13	D08	CM004RL110	G	15	2.64307	0.327674
20120514D1	G16					CM004RL110	G	16	-1.25782	0.00508933
20120514D1	G17	Tocris	0497	13	D09	CM004RL110	G	17	-1.08763	0.0708591
20120514D1	G18					CM004RL110	G	18	-0.703886	-0.934479
20120514D1	G19	Tocris	0523	13	D10	CM004RL110	G	19	-0.71056	-1.07855
20120514D1	G20					CM004RL110	G	20	1.10807	-1.36668
20120514D1	G21	Tocris	0579	13	D11	CM004RL110	G	21	0.033578	0.891415
20120514D1	G22					CM004RL110	G	22	-0.290105	-1.18816
20120514D1	H03	Tocris	0690	14	D02	CM004RL110	H	3	0.781053	0.418499
20120514D1	H04					CM004RL110	H	4	0.801075	-0.533597
20120514D1	H05	Tocris	0759	14	D03	CM004RL110	H	5	1.61195	-0.00430636
20120514D1	H06					CM004RL110	H	6	-0.904103	0.327674
20120514D1	H07	Tocris	0840	14	D04	CM004RL110	H	7	-0.153291	0.202399
20120514D1	H08					CM004RL110	H	8	0.106991	-0.574311
20120514D1	H09	Tocris	0873	14	D05	CM004RL110	H	9	-0.463626	-0.364474
20120514D1	H10					CM004RL110	H	10	0.400641	-0.164033
20120514D1	H11	Tocris	0908	14	D06	CM004RL110	H	11	-0.783973	-1.66421
20120514D1	H12					CM004RL110	H	12	-0.163302	-0.286177
20120514D1	H13	Tocris	0931	14	D07	CM004RL110	H	13	-0.970841	-1.39173
20120514D1	H14					CM004RL110	H	14	-0.0865519	-0.533597
20120514D1	H15	Tocris	0940	14	D08	CM004RL110	H	15	0.557478	-0.796676
20120514D1	H16					CM004RL110	H	16	0.307207	-0.878105
20120514D1	H17	Tocris	0960	14	D09	CM004RL110	H	17	-0.200008	-1.79262
20120514D1	H18					CM004RL110	H	18	0.270501	0.208663
20120514D1	H19	Tocris	0962	14	D10	CM004RL110	H	19	-1.64157	-0.740301
20120514D1	H20					CM004RL110	H	20	-0.283432	-0.959534
20120514D1	H21	Tocris	0965	14	D11	CM004RL110	H	21	-1.44802	7.76592
20120514D1	H22					CM004RL110	H	22	-1.24781	0.265037
20120514D1	I03	Tocris	0616	13	E02	CM004RL110	I	3	-0.156628	0.706634
20120514D1	I04					CM004RL110	I	4	-0.904103	-0.25799
20120514D1	I05	Tocris	0618	13	E03	CM004RL110	I	5	-0.14328	0.769271
20120514D1	I06					CM004RL110	I	6	-0.960831	-0.176561
20120514D1	I07	Tocris	0619	13	E04	CM004RL110	I	7	3.69087	4.49623
20120514D1	I08					CM004RL110	I	8	-0.793983	-1.22261
20120514D1	I09					CM004RL110	I	9	-2.10874	-1.34789
20120514D1	I10					CM004RL110	I	10	-1.36794	-0.937611
20120514D1	I11					CM004RL110	I	11	-1.64157	-0.62129
20120514D1	I12					CM004RL110	I	12	-1.00421	-1.02844
20120514D1	I13	Tocris	0797	13	E07	CM004RL110	I	13	-2.03866	-1.03157
20120514D1	I14					CM004RL110	I	14	-0.290105	-0.718378
20120514D1	I15	Tocris	0832	13	E08	CM004RL110	I	15	-2.28226	-0.0356253
20120514D1	I16					CM004RL110	I	16	-0.593767	-2.01498
20120514D1	I17	Tocris	0902	13	E09	CM004RL110	I	17	-1.28451	-1.62976
20120514D1	I18					CM004RL110	I	18	1.31496	0.434159
20120514D1	I19	Tocris	0993	13	E10	CM004RL110	I	19	-1.08763	-0.846786
20120514D1	I20					CM004RL110	I	20	-1.30787	-0.868709
20120514D1	I21	Tocris	1045	13	E11	CM004RL110	I	21	-0.0998997	-1.18503
20120514D1	I22					CM004RL110	I	22	1.16814	-0.37387
20120514D1	J03	Tocris	0994	14	E02	CM004RL110	J	3	-0.02315	1.31422
20120514D1	J04					CM004RL110	J	4	1.03466	0.0959143
20120514D1	J05	Tocris	0996	14	E03	CM004RL110	J	5	-1.55814	-0.871841
20120514D1	J06					CM004RL110	J	6	0.824433	-0.627553
20120514D1	J07	Tocris	1001	14	E04	CM004RL110	J	7	-1.58484	-1.32597
20120514D1	J08					CM004RL110	J	8	-0.430257	0.308883
20120514D1	J09	Tocris	1030	14	E05	CM004RL110	J	9	-0.79732	-1.39487
20120514D1	J10					CM004RL110	J	10	-0.4703	-1.01591
20120514D1	J11	Tocris	1064	14	E06	CM004RL110	J	11	-1.38129	-0.768489
20120514D1	J12					CM004RL110	J	12	-0.113247	-0.95327
20120514D1	J13	Tocris	1067	14	E07	CM004RL110	J	13	0.413989	-1.19443
20120514D1	J14					CM004RL110	J	14	-0.757277	-1.05036
20120514D1	J15	Tocris	1077	14	E08	CM004RL110	J	15	-1.8885	-1.19443
20120514D1	J16					CM004RL110	J	16	-0.690538	-1.32283
20120514D1	J17	Tocris	1100	14	E09	CM004RL110	J	17	-1.43801	-0.289309
20120514D1	J18					CM004RL110	J	18	-1.73834	-0.91882
20120514D1	J19	Tocris	1103	14	E10	CM004RL110	J	19	-1.55147	-1.14432
20120514D1	J20					CM004RL110	J	20	-0.974178	-2.31878
20120514D1	J21	Tocris	1125	14	E11	CM004RL110	J	21	-1.6082	-0.0262296
20120514D1	J22					CM004RL110	J	22	-0.890755	-0.909424
20120514D1	K03	Tocris	1065	13	F02	CM004RL110	K	3	-1.24113	-1.08481
20120514D1	K04					CM004RL110	K	4	-1.00755	-1.21322
20120514D1	K05	Tocris	1144	13	F03	CM004RL110	K	5	-0.860722	-0.301836
20120514D1	K06					CM004RL110	K	6	-0.363518	-1.23827
20120514D1	K07	Tocris	1300	13	F04	CM004RL110	K	7	-0.693875	-0.521069
20120514D1	K08					CM004RL110	K	8	-0.176649	0.0645953
20120514D1	K09	Tocris	1323	13	F05	CM004RL110	K	9	1.32831	-0.865577
20120514D1	K10					CM004RL110	K	10	0.17373	-1.00964
20120514D1	K11	Tocris	1347	13	F06	CM004RL110	K	11	0.527445	-0.624421
20120514D1	K12					CM004RL110	K	12	-0.773962	-0.182824
20120514D1	K13	Tocris	1377	13	F07	CM004RL110	K	13	1.7154	-1.07855
20120514D1	K14					CM004RL110	K	14	-0.00312838	0.603281
20120514D1	K15	Tocris	1378	13	F08	CM004RL110	K	15	0.494076	-0.492882
20120514D1	K16					CM004RL110	K	16	-1.00755	-1.01591
20120514D1	K17	Tocris	1412	13	F09	CM004RL110	K	17	0.413989	-1.83647
20120514D1	K18					CM004RL110	K	18	0.657586	-1.58905
20120514D1	K19	Tocris	1427	13	F10	CM004RL110	K	19	-0.884081	-1.04409
20120514D1	K20					CM004RL110	K	20	0.460707	-0.470959
20120514D1	K21	Tocris	1475	13	F11	CM004RL110	K	21	-0.343496	-1.42619
20120514D1	K22					CM004RL110	K	22	-0.473637	0.227454
20120514D1	L03	Tocris	1127	14	F02	CM004RL110	L	3	-0.136606	-0.0105701
20120514D1	L04					CM004RL110	L	4	-0.139943	0.0927824
20120514D1	L05	Tocris	1142	14	F03	CM004RL110	L	5	0.640901	0.415368
20120514D1	L06					CM004RL110	L	6	0.0369149	0.418499
20120514D1	L07	Tocris	1205	14	F04	CM004RL110	L	7	0.0435888	-1.00025
20120514D1	L08					CM004RL110	L	8	0.240468	0.0426721
20120514D1	L09	Tocris	1230	14	F05	CM004RL110	L	9	1.4084	0.972845
20120514D1	L10					CM004RL110	L	10	-1.05427	-0.630685
20120514D1	L11	Tocris	1235	14	F06	CM004RL110	L	11	-1.28785	-0.48975
20120514D1	L12					CM004RL110	L	12	-0.38354	-0.232935
20120514D1	L13	Tocris	1257	14	F07	CM004RL110	L	13	-0.466963	-0.295573
20120514D1	L14					CM004RL110	L	14	-0.436931	-0.0168339
20120514D1	L15	Tocris	1260	14	F08	CM004RL110	L	15	-0.517017	-1.07228
20120514D1	L16					CM004RL110	L	16	-0.233377	-0.351947
20120514D1	L17	Tocris	1290	14	F09	CM004RL110	L	17	0.0836321	-0.232935
20120514D1	L18					CM004RL110	L	18	0.580836	0.534379
20120514D1	L19	Tocris	1326	14	F10	CM004RL110	L	19	-0.136606	-0.790412
20120514D1	L20					CM004RL110	L	20	-0.483648	-0.715246
20120514D1	L21	Tocris	1364	14	F11	CM004RL110	L	21	-0.410235	-1.1036
20120514D1	L22					CM004RL110	L	22	0.293859	-0.0951313
20120514D1	M03	Tocris	1494	13	G02	CM004RL110	M	3	-1.83511	-1.42932
20120514D1	M04					CM004RL110	M	4	-1.31788	-0.207879
20120514D1	M05	Tocris	1541	13	G03	CM004RL110	M	5	-2.83953	-0.677664
20120514D1	M06					CM004RL110	M	6	-2.57925	-1.00338
20120514D1	M07	Tocris	1555	13	G04	CM004RL110	M	7	3.32714	3.78215
20120514D1	M08					CM004RL110	M	8	-2.58926	-1.22261
20120514D1	M09	Tocris	1634	13	G05	CM004RL110	M	9	-3.93738	-2.27493
20120514D1	M10					CM004RL110	M	10	-0.807331	-1.968
20120514D1	M11	Tocris	1690	13	G06	CM004RL110	M	11	-2.19884	-1.3197
20120514D1	M12					CM004RL110	M	12	-1.54146	-1.50762
20120514D1	M13	Tocris	1743	13	G07	CM004RL110	M	13	-2.57591	-2.07762
20120514D1	M14					CM004RL110	M	14	-0.440268	-2.48477
20120514D1	M15	Tocris	1744	13	G08	CM004RL110	M	15	-1.61153	-0.934479
20120514D1	M16					CM004RL110	M	16	-2.44577	-2.71026
20120514D1	M17	Tocris	1806	13	G09	CM004RL110	M	17	-3.12317	-2.17784
20120514D1	M18					CM004RL110	M	18	-2.13877	-1.88031
20120514D1	M19	Tocris	1868	13	G10	CM004RL110	M	19	-1.50141	-1.92103
20120514D1	M20					CM004RL110	M	20	-0.840701	-1.15058
20120514D1	M21	Tocris	1969	13	G11	CM004RL110	M	21	-2.45578	-2.70713
20120514D1	M22					CM004RL110	M	22	-1.60486	-1.94608
20120514D1	N03	Tocris	1390	14	G02	CM004RL110	N	3	0.0469257	-0.333155
20120514D1	N04					CM004RL110	N	4	-0.4703	-0.254858
20120514D1	N05	Tocris	1416	14	G03	CM004RL110	N	5	-1.98861	-0.611894
20120514D1	N06					CM004RL110	N	6	-0.330149	-1.36042
20120514D1	N07	Tocris	1467	14	G04	CM004RL110	N	7	94.2188	100.191
20120514D1	N08					CM004RL110	N	8	0.0435888	-1.52327
20120514D1	N09	Tocris	1620	14	G05	CM004RL110	N	9	-3.04308	-0.292441
20120514D1	N10					CM004RL110	N	10	-0.743929	-1.52954
20120514D1	N11	Tocris	1707	14	G06	CM004RL110	N	11	1.15145	-0.339419
20120514D1	N12					CM004RL110	N	12	-1.75836	-1.62976
20120514D1	N13	Tocris	1708	14	G07	CM004RL110	N	13	-1.55814	-0.821731
20120514D1	N14					CM004RL110	N	14	-1.55481	-1.77069
20120514D1	N15	Tocris	1759	14	G08	CM004RL110	N	15	-0.483648	-1.52327
20120514D1	N16					CM004RL110	N	16	0.524108	-1.47943
20120514D1	N17	Tocris	1769	14	G09	CM004RL110	N	17	-1.43134	-0.248594
20120514D1	N18					CM004RL110	N	18	-0.593767	-1.40426
20120514D1	N19	Tocris	1869	14	G10	CM004RL110	N	19	-1.19775	-1.69866
20120514D1	N20					CM004RL110	N	20	-1.82176	-0.589971
20120514D1	N21	Tocris	2073	14	G11	CM004RL110	N	21	-2.1054	-1.9085
20120514D1	N22					CM004RL110	N	22	-0.50367	-1.4669
20120514D1	O03					CM004RL110	O	3	0.213773	-1.2508
20120514D1	O04					CM004RL110	O	4	-0.00646532	0.944658
20120514D1	O05	Tocris	2076	13	H03	CM004RL110	O	5	-0.50367	1.15763
20120514D1	O06					CM004RL110	O	6	0.283849	0.0426721
20120514D1	O07	Tocris	2077	13	H04	CM004RL110	O	7	-0.380203	1.01356
20120514D1	O08					CM004RL110	O	8	1.09472	-0.37387
20120514D1	O09	Tocris	2387	13	H05	CM004RL110	O	9	-0.00312838	0.277564
20120514D1	O10					CM004RL110	O	10	0.187077	-0.298704
20120514D1	O11	Tocris	2403	13	H06	CM004RL110	O	11	-1.04425	0.193003
20120514D1	O12					CM004RL110	O	12	-0.416909	-0.0105701
20120514D1	O13	Tocris	2477	13	H07	CM004RL110	O	13	-1.10098	-0.802939
20120514D1	O14					CM004RL110	O	14	-0.783973	-1.52327
20120514D1	O15	Tocris	1254	13	H08	CM004RL110	O	15	-1.53145	-1.31031
20120514D1	O16					CM004RL110	O	16	-1.40131	-1.46064
20120514D1	O17	Tocris	3506	13	H09	CM004RL110	O	17	-1.29786	-1.3886
20120514D1	O18					CM004RL110	O	18	-1.51476	0.0113531
20120514D1	O19					CM004RL110	O	19	-1.92187	-1.11613
20120514D1	O20					CM004RL110	O	20	-0.443605	-1.13805
20120514D1	O21					CM004RL110	O	21	-1.15437	-2.31564
20120514D1	O22					CM004RL110	O	22	-0.106574	-1.20069
20120514D1	P03	Tocris	2228	14	H02	CM004RL110	P	3	1.45511	0.528116
20120514D1	P04					CM004RL110	P	4	0.921204	-0.154637
20120514D1	P05	Tocris	2251	14	H03	CM004RL110	P	5	1.969	0.456082
20120514D1	P06					CM004RL110	P	6	2.63639	0.299487
20120514D1	P07	Tocris	2459	14	H04	CM004RL110	P	7	1.00463	0.0332764
20120514D1	P08					CM004RL110	P	8	1.39839	-0.583707
20120514D1	P09	Tocris	2470	14	H05	CM004RL110	P	9	1.02465	-0.204748
20120514D1	P10					CM004RL110	P	10	0.680945	-0.37387
20120514D1	P11	Tocris	2503	14	H06	CM004RL110	P	11	-0.627136	-1.05662
20120514D1	P12					CM004RL110	P	12	-0.707223	1.01356
20120514D1	P13	Tocris	2521	14	H07	CM004RL110	P	13	-1.00087	-1.01591
20120514D1	P14					CM004RL110	P	14	-0.543713	-0.317496
20120514D1	P15	Tocris	2550	14	H08	CM004RL110	P	15	0.0369149	-0.442772
20120514D1	P16					CM004RL110	P	16	0.00688244	-1.02217
20120514D1	P17	Tocris	2687	14	H09	CM004RL110	P	17	0.377283	-0.884369
20120514D1	P18					CM004RL110	P	18	-0.937472	-0.608762
20120514D1	P19	Tocris	3545	14	H10	CM004RL110	P	19	-1.0209	-1.6235
20120514D1	P20					CM004RL110	P	20	-1.07762	0.108442
20120514D1	P21	Tocris	3689	14	H11	CM004RL110	P	21	-0.777299	0.111574
20120514D1	P22					CM004RL110	P	22	-1.31455	-0.176561
20120514E1	A03	MicroSource	01503637	120130-01	A02	CM005RL110	A	3	-1.76685	0.12932
20120514E1	A04	MicroSource	00330058	120130-03	A02	CM005RL110	A	4	-1.908	0.935024
20120514E1	A05	MicroSource	01503921	120130-01	A03	CM005RL110	A	5	-1.32997	1.03848
20120514E1	A06	MicroSource	01502003	120130-03	A03	CM005RL110	A	6	-2.52636	1.66549
20120514E1	A07	MicroSource	01504523	120130-01	A04	CM005RL110	A	7	-0.432681	1.60592
20120514E1	A08	MicroSource	01600716	120130-03	A04	CM005RL110	A	8	-1.34341	0.891134
20120514E1	A09	MicroSource	01503032	120130-01	A05	CM005RL110	A	9	-1.35013	0.596441
20120514E1	A10	MicroSource	01500996	120130-03	A05	CM005RL110	A	10	-1.86767	2.43671
20120514E1	A11	MicroSource	01504187	120130-01	A06	CM005RL110	A	11	-1.57194	1.31123
20120514E1	A12	MicroSource	01501143	120130-03	A06	CM005RL110	A	12	-2.72127	0.978915
20120514E1	A13	MicroSource	01503114	120130-01	A07	CM005RL110	A	13	-1.5921	0.361313
20120514E1	A14	MicroSource	01501157	120130-03	A07	CM005RL110	A	14	-1.88447	1.2642
20120514E1	A15	MicroSource	01503920	120130-01	A08	CM005RL110	A	15	-1.74333	1.04789
20120514E1	A16	MicroSource	01501198	120130-03	A08	CM005RL110	A	16	-0.802351	0.543145
20120514E1	A17	MicroSource	01500641	120130-01	A09	CM005RL110	A	17	-1.78365	0.11678
20120514E1	A18	MicroSource	01503043	120130-03	A09	CM005RL110	A	18	-1.01407	0.784543
20120514E1	A19	MicroSource	00310006	120130-01	A10	CM005RL110	A	19	-1.06784	0.163806
20120514E1	A20	MicroSource	01503391	120130-03	A10	CM005RL110	A	20	-1.12161	0.242181
20120514E1	A21	MicroSource	01501114	120130-01	A11	CM005RL110	A	21	-2.84897	0.775138
20120514E1	A22	MicroSource	01503051	120130-03	A11	CM005RL110	A	22	-2.34152	0.383258
20120514E1	B03	MicroSource	01500618	120130-02	A02	CM005RL110	B	3	-	-
20120514E1	B04	MicroSource	01502375	120130-04	A02	CM005RL110	B	4	-0.987186	0.819028
20120514E1	B05	MicroSource	01503894	120130-02	A03	CM005RL110	B	5	-1.56521	1.85359
20120514E1	B06	MicroSource	01500656	120130-04	A03	CM005RL110	B	6	-1.04096	0.662276
20120514E1	B07	MicroSource	01502248	120130-02	A04	CM005RL110	B	7	-0.16047	1.48052
20120514E1	B08	MicroSource	01502263	120130-04	A04	CM005RL110	B	8	-1.1485	0.859784
20120514E1	B09	MicroSource	01503740	120130-02	A05	CM005RL110	B	9	0.229363	-0.215534
20120514E1	B10	MicroSource	01504027	120130-04	A05	CM005RL110	B	10	-1.42407	0.555685
20120514E1	B11	MicroSource	01502412	120130-02	A06	CM005RL110	B	11	-0.31842	0.257857
20120514E1	B12	MicroSource	01505334	120130-04	A06	CM005RL110	B	12	1.14009	0.750057
20120514E1	B13	MicroSource	01502285	120130-02	A07	CM005RL110	B	13	-1.4039	0.624656
20120514E1	B14	MicroSource	01505355	120130-04	A07	CM005RL110	B	14	-1.50472	-0.594873
20120514E1	B15	MicroSource	01503887	120130-02	A08	CM005RL110	B	15	-1.11489	0.775138
20120514E1	B16	MicroSource	00330012	120130-04	A08	CM005RL110	B	16	-0.560385	1.51814
20120514E1	B17	MicroSource	01502303	120130-02	A09	CM005RL110	B	17	-0.456206	-0.0337016
20120514E1	B18	MicroSource	01504030	120130-04	A09	CM005RL110	B	18	-0.415878	0.737517
20120514E1	B19	MicroSource	01502311	120130-02	A10	CM005RL110	B	19	-0.919973	0.213966
20120514E1	B20	MicroSource	01500616	120130-04	A10	CM005RL110	B	20	-0.936776	-0.243749
20120514E1	B21	MicroSource	01502319	120130-02	A11	CM005RL110	B	21	-0.785548	0.317422
20120514E1	B22	MicroSource	00210296	120130-04	A11	CM005RL110	B	22	-0.325141	-0.143428
20120514E1	C03	MicroSource	01505168	120130-01	B02	CM005RL110	C	3	8.74856	13.7699
20120514E1	C04	MicroSource	01501199	120130-03	B02	CM005RL110	C	4	-1.39382	0.348773
20120514E1	C05	MicroSource	00330017	120130-01	B03	CM005RL110	C	5	-2.07603	-0.936592
20120514E1	C06	MicroSource	01503403	120130-03	B03	CM005RL110	C	6	-2.02226	-0.372285
20120514E1	C07	MicroSource	01300022	120130-01	B04	CM005RL110	C	7	-0.946858	0.0760246
20120514E1	C08	MicroSource	01503941	120130-03	B04	CM005RL110	C	8	1.40894	0.677952
20120514E1	C09	MicroSource	01300042	120130-01	B05	CM005RL110	C	9	0.219281	-0.347205
20120514E1	C10	MicroSource	01504145	120130-03	B05	CM005RL110	C	10	-2.02898	-1.21874
20120514E1	C11	MicroSource	01503606	120130-01	B06	CM005RL110	C	11	-1.98865	0.329962
20120514E1	C12	MicroSource	01504151	120130-03	B06	CM005RL110	C	12	-1.96177	-0.601143
20120514E1	C13	MicroSource	01500822	120130-01	B07	CM005RL110	C	13	-1.93488	0.192021
20120514E1	C14	MicroSource	01504244	120130-03	B07	CM005RL110	C	14	-0.177273	-1.32847
20120514E1	C15	MicroSource	01503917	120130-01	B08	CM005RL110	C	15	-0.200798	0.605846
20120514E1	C16	MicroSource	01504830	120130-03	B08	CM005RL110	C	16	-1.24931	-0.626223
20120514E1	C17	MicroSource	01503886	120130-01	B09	CM005RL110	C	17	-1.15858	-0.842541
20120514E1	C18	MicroSource	01505316	120130-03	B09	CM005RL110	C	18	0.259609	0.590171
20120514E1	C19	MicroSource	01502353	120130-01	B10	CM005RL110	C	19	-0.610795	0.289207
20120514E1	C20	MicroSource	01505317	120130-03	B10	CM005RL110	C	20	0.0445284	0.561955
20120514E1	C21	MicroSource	01500839	120130-01	B11	CM005RL110	C	21	-0.778826	-0.340935
20120514E1	C22	MicroSource	01505915	120130-03	B11	CM005RL110	C	22	-0.627598	-1.28772
20120514E1	D03	MicroSource	01502317	120130-02	B02	CM005RL110	D	3	-3.837	-1.85829
20120514E1	D04	MicroSource	01503219	120130-04	B02	CM005RL110	D	4	-2.69103	-0.895837
20120514E1	D05	MicroSource	01502324	120130-02	B03	CM005RL110	D	5	-0.977104	-0.250019
20120514E1	D06	MicroSource	01500819	120130-04	B03	CM005RL110	D	6	-0.570467	0.348773
20120514E1	D07	MicroSource	01502328	120130-02	B04	CM005RL110	D	7	0.346985	-0.450661
20120514E1	D08	MicroSource	01600300	120130-04	B04	CM005RL110	D	8	-0.940137	-0.065052
20120514E1	D09	MicroSource	01502329	120130-02	B05	CM005RL110	D	9	-0.5335	-0.30018
20120514E1	D10	MicroSource	01506169	120130-04	B05	CM005RL110	D	10	-1.63243	-0.732815
20120514E1	D11	MicroSource	01502322	120130-02	B06	CM005RL110	D	11	-0.220962	1.0761
20120514E1	D12	MicroSource	01506108	120130-04	B06	CM005RL110	D	12	0.273051	0.499254
20120514E1	D13	MicroSource	01502335	120130-02	B07	CM005RL110	D	13	-0.610795	-0.488282
20120514E1	D14	MicroSource	01506163	120130-04	B07	CM005RL110	D	14	-1.02751	-0.118348
20120514E1	D15	MicroSource	01502342	120130-02	B08	CM005RL110	D	15	-1.40726	0.411473
20120514E1	D16	MicroSource	01504305	120130-04	B08	CM005RL110	D	16	-	-
20120514E1	D17	MicroSource	01502344	120130-02	B09	CM005RL110	D	17	-1.22579	0.54628
20120514E1	D18	MicroSource	01503042	120130-04	B09	CM005RL110	D	18	-1.13169	0.0289991
20120514E1	D19	MicroSource	01502349	120130-02	B10	CM005RL110	D	19	-5.56773	-1.66705
20120514E1	D20	MicroSource	01506047	120130-04	B10	CM005RL110	D	20	-1.95169	-1.11215
20120514E1	D21	MicroSource	01502352	120130-02	B11	CM005RL110	D	21	-0.788908	-1.09648
20120514E1	D22	MicroSource	01505323	120130-04	B11	CM005RL110	D	22	-0.698171	-0.911512
20120514E1	E03	MicroSource	01506088	120130-01	C02	CM005RL110	E	3	-3.39004	-2.43514
20120514E1	E04	MicroSource	01505986	120130-03	C02	CM005RL110	E	4	-1.71308	0.13559
20120514E1	E05	MicroSource	01504510	120130-01	C03	CM005RL110	E	5	-0.382272	-1.30339
20120514E1	E06	MicroSource	01505773	120130-03	C03	CM005RL110	E	6	-2.17349	-0.262559
20120514E1	E07	MicroSource	01506173	120130-01	C04	CM005RL110	E	7	-2.7616	-0.914647
20120514E1	E08	MicroSource	01500629	120130-03	C04	CM005RL110	E	8	-1.14177	-1.49149
20120514E1	E09	MicroSource	00270029	120130-01	C05	CM005RL110	E	9	-1.12161	0.442824
20120514E1	E10	MicroSource	01500666	120130-03	C05	CM005RL110	E	10	-0.187355	-1.71408
20120514E1	E11	MicroSource	01504515	120130-01	C06	CM005RL110	E	11	6.22473	0.433419
20120514E1	E12	MicroSource	01502015	120130-03	C06	CM005RL110	E	12	-1.39718	-0.632494
20120514E1	E13	MicroSource	01503602	120130-01	C07	CM005RL110	E	13	-1.47448	-0.704599
20120514E1	E14	MicroSource	01503041	120130-03	C07	CM005RL110	E	14	-0.567106	-0.206129
20120514E1	E15	MicroSource	01503200	120130-01	C08	CM005RL110	E	15	3.19008	0.132455
20120514E1	E16	MicroSource	01500632	120130-03	C08	CM005RL110	E	16	-1.68284	-1.7517
20120514E1	E17	MicroSource	01503939	120130-01	C09	CM005RL110	E	17	-0.718335	0.192021
20120514E1	E18	MicroSource	00210205	120130-03	C09	CM005RL110	E	18	-0.721696	0.0634845
20120514E1	E19	MicroSource	01505083	120130-01	C10	CM005RL110	E	19	-1.93488	-0.31899
20120514E1	E20	MicroSource	01505354	120130-03	C10	CM005RL110	E	20	-1.72652	-0.177913
20120514E1	E21	MicroSource	01505329	120130-01	C11	CM005RL110	E	21	-1.44759	-1.02751
20120514E1	E22	MicroSource	01502386	120130-03	C11	CM005RL110	E	22	-1.1485	1.04475
20120514E1	F03	MicroSource	01502366	120130-02	C02	CM005RL110	F	3	0.699851	-0.0337016
20120514E1	F04	MicroSource	01506167	120130-04	C02	CM005RL110	F	4	1.99033	1.46798
20120514E1	F05	MicroSource	01502368	120130-02	C03	CM005RL110	F	5	0.632639	0.11051
20120514E1	F06	MicroSource	01503936	120130-04	C03	CM005RL110	F	6	-0.809072	-0.162238
20120514E1	F07	MicroSource	01502510	120130-02	C04	CM005RL110	F	7	0.951899	0.445959
20120514E1	F08	MicroSource	01506175	120130-04	C04	CM005RL110	F	8	0.488132	0.251587
20120514E1	F09	MicroSource	01504833	120130-02	C05	CM005RL110	F	9	-0.0294055	0.151265
20120514E1	F10	MicroSource	01506152	120130-04	C05	CM005RL110	F	10	-0.617516	-0.215534
20120514E1	F11	MicroSource	01505903	120130-02	C06	CM005RL110	F	11	-0.26801	-0.895837
20120514E1	F12	MicroSource	01301024	120130-04	C06	CM005RL110	F	12	0.141987	-0.450661
20120514E1	F13	MicroSource	01506168	120130-02	C07	CM005RL110	F	13	-0.388993	-0.648169
20120514E1	F14	MicroSource	01502012	120130-04	C07	CM005RL110	F	14	-0.829236	-0.31899
20120514E1	F15					CM005RL110	F	15	-0.194077	-0.776705
20120514E1	F16	MicroSource	01501189	120130-04	C08	CM005RL110	F	16	-0.103339	-0.598008
20120514E1	F17	MicroSource	01504507	120130-02	C09	CM005RL110	F	17	0.0142827	0.637196
20120514E1	F18	MicroSource	01504116	120130-04	C09	CM005RL110	F	18	0.988866	-0.0148914
20120514E1	F19	MicroSource	01502555	120130-02	C10	CM005RL110	F	19	0.649442	-1.08394
20120514E1	F20	MicroSource	01504098	120130-04	C10	CM005RL110	F	20	0.0848559	0.483579
20120514E1	F21	MicroSource	01504216	120130-02	C11	CM005RL110	F	21	-1.53497	-1.35982
20120514E1	F22	MicroSource	01504191	120130-04	C11	CM005RL110	F	22	-0.593992	-1.95548
20120514E1	G03	MicroSource	01505728	120130-01	D02	CM005RL110	G	3	-3.2052	-0.924052
20120514E1	G04	MicroSource	01502383	120130-03	D02	CM005RL110	G	4	-2.08947	-0.591738
20120514E1	G05	MicroSource	01504502	120130-01	D03	CM005RL110	G	5	-1.18882	-0.340935
20120514E1	G06	MicroSource	01500195	120130-03	D03	CM005RL110	G	6	-0.288174	-0.503957
20120514E1	G07	MicroSource	01505997	120130-01	D04	CM005RL110	G	7	1.32829	-0.660709
20120514E1	G08	MicroSource	01500679	120130-03	D04	CM005RL110	G	8	-0.997267	0.226506
20120514E1	G09	MicroSource	01502413	120130-01	D05	CM005RL110	G	9	-1.81054	-0.29391
20120514E1	G10	MicroSource	01503045	120130-03	D05	CM005RL110	G	10	-2.62717	-1.30339
20120514E1	G11	MicroSource	01504616	120130-01	D06	CM005RL110	G	11	-0.469648	0.0352691
20120514E1	G12	MicroSource	01502001	120130-03	D06	CM005RL110	G	12	-2.92627	0.119915
20120514E1	G13	MicroSource	01503744	120130-01	D07	CM005RL110	G	13	-1.85087	-0.692059
20120514E1	G14	MicroSource	01503105	120130-03	D07	CM005RL110	G	14	-0.644401	-1.28145
20120514E1	G15	MicroSource	02300218	120130-01	D08	CM005RL110	G	15	-0.661204	-0.31899
20120514E1	G16	MicroSource	00300546	120130-03	D08	CM005RL110	G	16	-1.84079	-1.41312
20120514E1	G17	MicroSource	01504505	120130-01	D09	CM005RL110	G	17	-2.26759	-1.53538
20120514E1	G18	MicroSource	01501170	120130-03	D09	CM005RL110	G	18	-0.963661	0.0289991
20120514E1	G19	MicroSource	01505990	120130-01	D10	CM005RL110	G	19	-0.953579	0.254722
20120514E1	G20	MicroSource	01503017	120130-03	D10	CM005RL110	G	20	-0.694811	-0.958537
20120514E1	G21	MicroSource	01503320	120130-01	D11	CM005RL110	G	21	-2.113	-0.535307
20120514E1	G22	MicroSource	00212151	120130-03	D11	CM005RL110	G	22	-0.335223	-1.04945
20120514E1	H03	MicroSource	01504518	120130-02	D02	CM005RL110	H	3	-0.973743	-1.11215
20120514E1	H04	MicroSource	01504831	120130-04	D02	CM005RL110	H	4	0.464607	-0.303315
20120514E1	H05	MicroSource	01506078	120130-02	D03	CM005RL110	H	5	1.11993	-0.717139
20120514E1	H06	MicroSource	01506107	120130-04	D03	CM005RL110	H	6	0.602393	-0.582333
20120514E1	H07	MicroSource	01500758	120130-02	D04	CM005RL110	H	7	0.666245	0.561955
20120514E1	H08	MicroSource	01503085	120130-04	D04	CM005RL110	H	8	-0.362108	-0.00235128
20120514E1	H09	MicroSource	01501116	120130-02	D05	CM005RL110	H	9	1.07288	0.627791
20120514E1	H10	MicroSource	01503630	120130-04	D05	CM005RL110	H	10	0.672966	-0.237479
20120514E1	H11	MicroSource	01501174	120130-02	D06	CM005RL110	H	11	0.615836	0.768868
20120514E1	H12	MicroSource	01503230	120130-04	D06	CM005RL110	H	12	-0.694811	-0.886431
20120514E1	H13	MicroSource	01503100	120130-02	D07	CM005RL110	H	13	0.189035	-0.218669
20120514E1	H14					CM005RL110	H	14	-0.399075	-0.309585
20120514E1	H15					CM005RL110	H	15	-0.37219	-0.870756
20120514E1	H16	MicroSource	01301027	120130-04	D08	CM005RL110	H	16	-2.13652	-0.0337016
20120514E1	H17	MicroSource	01503297	120130-02	D09	CM005RL110	H	17	-1.24259	-1.9304
20120514E1	H18	MicroSource	01301017	120130-04	D09	CM005RL110	H	18	-1.02751	-0.171643
20120514E1	H19	MicroSource	01503954	120130-02	D10	CM005RL110	H	19	-0.819154	-1.23128
20120514E1	H20	MicroSource	01400208	120130-04	D10	CM005RL110	H	20	0.0512496	-2.39125
20120514E1	H21	MicroSource	01505011	120130-02	D11	CM005RL110	H	21	-1.34005	-0.645034
20120514E1	H22					CM005RL110	H	22	-1.24595	-0.883296
20120514E1	I03	MicroSource	01506064	120130-01	E02	CM005RL110	I	3	-3.27242	-1.46641
20120514E1	I04	MicroSource	01506106	120130-03	E02	CM005RL110	I	4	-0.308338	-0.739085
20120514E1	I05	MicroSource	01505827	120130-01	E03	CM005RL110	I	5	-1.75005	-0.961672
20120514E1	I06	MicroSource	01400010	120130-03	E03	CM005RL110	I	6	-1.77357	-1.49463
20120514E1	I07	MicroSource	01503127	120130-01	E04	CM005RL110	I	7	-8.97877	-5.65169
20120514E1	I08	MicroSource	01502735	120130-03	E04	CM005RL110	I	8	-0.768745	-1.09334
20120514E1	I09	MicroSource	01506024	120130-01	E05	CM005RL110	I	9	-1.74669	-1.73916
20120514E1	I10	MicroSource	01505953	120130-03	E05	CM005RL110	I	10	-1.00399	-0.228074
20120514E1	I11	MicroSource	01503711	120130-01	E06	CM005RL110	I	11	-2.36504	-0.641899
20120514E1	I12	MicroSource	01500678	120130-03	E06	CM005RL110	I	12	0.353706	0.025864
20120514E1	I13	MicroSource	01503383	120130-01	E07	CM005RL110	I	13	-1.23587	-2.20315
20120514E1	I14	MicroSource	01500621	120130-03	E07	CM005RL110	I	14	-1.69292	-1.79873
20120514E1	I15	MicroSource	01504100	120130-01	E08	CM005RL110	I	15	-2.14996	-1.22501
20120514E1	I16	MicroSource	01503074	120130-03	E08	CM005RL110	I	16	-7.72189	-4.89928
20120514E1	I17	MicroSource	01504143	120130-01	E09	CM005RL110	I	17	-1.02415	-0.817461
20120514E1	I18	MicroSource	00210369	120130-03	E09	CM005RL110	I	18	-0.365469	-0.196723
20120514E1	I19	MicroSource	01505788	120130-01	E10	CM005RL110	I	19	-1.78365	-1.69214
20120514E1	I20	MicroSource	01504525	120130-03	E10	CM005RL110	I	20	-1.23923	-1.53538
20120514E1	I21	MicroSource	01500636	120130-01	E11	CM005RL110	I	21	-0.718335	-0.641899
20120514E1	I22	MicroSource	01502312	120130-03	E11	CM005RL110	I	22	-0.859482	-1.38177
20120514E1	J03	MicroSource	01500624	120130-02	E02	CM005RL110	J	3	-0.197437	-0.964807
20120514E1	J04	MicroSource	01500909	120130-04	E02	CM005RL110	J	4	1.09977	-0.532172
20120514E1	J05	MicroSource	03100024	120130-02	E03	CM005RL110	J	5	-0.987186	0.12305
20120514E1	J06	MicroSource	01501159	120130-04	E03	CM005RL110	J	6	0.175593	0.304882
20120514E1	J07	MicroSource	01503077	120130-02	E04	CM005RL110	J	7	-0.261289	-1.36923
20120514E1	J08	MicroSource	01500281	120130-04	E04	CM005RL110	J	8	3.07246	0.919349
20120514E1	J09	MicroSource	01504137	120130-02	E05	CM005RL110	J	9	-0.0966181	-0.118348
20120514E1	J10	MicroSource	01500623	120130-04	E05	CM005RL110	J	10	-0.177273	-1.17172
20120514E1	J11	MicroSource	01505772	120130-02	E06	CM005RL110	J	11	-0.74522	-1.21874
20120514E1	J12	MicroSource	01500645	120130-04	E06	CM005RL110	J	12	-0.466288	-1.23755
20120514E1	J13	MicroSource	02300261	120130-02	E07	CM005RL110	J	13	-1.19218	-1.3755
20120514E1	J14	MicroSource	01500646	120130-04	E07	CM005RL110	J	14	-2.04578	-1.04005
20120514E1	J15	MicroSource	01505304	120130-02	E08	CM005RL110	J	15	-0.654483	-0.845676
20120514E1	J16	MicroSource	01500626	120130-04	E08	CM005RL110	J	16	0.279773	-0.993023
20120514E1	J17	MicroSource	01501194	120130-02	E09	CM005RL110	J	17	-0.37219	-1.4382
20120514E1	J18	MicroSource	01501004	120130-04	E09	CM005RL110	J	18	0.259609	-0.80492
20120514E1	J19	MicroSource	01503218	120130-02	E10	CM005RL110	J	19	-1.78702	-2.11223
20120514E1	J20	MicroSource	01505082	120130-04	E10	CM005RL110	J	20	-1.28628	-1.805
20120514E1	J21	MicroSource	01500811	120130-02	E11	CM005RL110	J	21	-4.42511	-4.82404
20120514E1	J22	MicroSource	01502276	120130-04	E11	CM005RL110	J	22	-1.90464	-2.84583
20120514E1	K03	MicroSource	01500669	120130-01	F02	CM005RL110	K	3	0.434362	-1.2062
20120514E1	K04	MicroSource	01506190	120130-03	F02	CM005RL110	K	4	0.696491	-0.202994
20120514E1	K05	MicroSource	01505770	120130-01	F03	CM005RL110	K	5	0.296576	-0.32526
20120514E1	K06	MicroSource	01501146	120130-03	F03	CM005RL110	K	6	-1.40054	-1.62943
20120514E1	K07	MicroSource	01504617	120130-01	F04	CM005RL110	K	7	1.6173	-0.37542
20120514E1	K08	MicroSource	01506161	120130-03	F04	CM005RL110	K	8	0.437722	-0.964807
20120514E1	K09	MicroSource	01505755	120130-01	F05	CM005RL110	K	9	-0.58391	-0.73595
20120514E1	K10	MicroSource	01506200	120130-03	F05	CM005RL110	K	10	0.0512496	-1.34728
20120514E1	K11	MicroSource	01505783	120130-01	F06	CM005RL110	K	11	0.888047	-0.949132
20120514E1	K12	MicroSource	01504524	120130-03	F06	CM005RL110	K	12	0.400755	-0.745355
20120514E1	K13	MicroSource	01503231	120130-01	F07	CM005RL110	K	13	1.38206	-0.428716
20120514E1	K14	MicroSource	01701028	120130-03	F07	CM005RL110	K	14	-2.16005	-2.08715
20120514E1	K15	MicroSource	01505173	120130-01	F08	CM005RL110	K	15	0.894768	0.659141
20120514E1	K16	MicroSource	01503890	120130-03	F08	CM005RL110	K	16	1.44927	-1.24069
20120514E1	K17	MicroSource	01505992	120130-01	F09	CM005RL110	K	17	0.417558	-0.977347
20120514E1	K18	MicroSource	01503635	120130-03	F09	CM005RL110	K	18	0.471329	-1.32847
20120514E1	K19	MicroSource	01506027	120130-01	F10	CM005RL110	K	19	0.69313	-0.657574
20120514E1	K20	MicroSource	00330066	120130-03	F10	CM005RL110	K	20	-0.315059	-1.21247
20120514E1	K21	MicroSource	01500634	120130-01	F11	CM005RL110	K	21	-1.61226	-0.79865
20120514E1	K22	MicroSource	01506039	120130-03	F11	CM005RL110	K	22	-0.90317	-0.682654
20120514E1	L03	MicroSource	01501111	120130-02	F02	CM005RL110	L	3	1.23083	-0.848811
20120514E1	L04	MicroSource	01502315	120130-04	F02	CM005RL110	L	4	0.753622	-0.591738
20120514E1	L05	MicroSource	01505920	120130-02	F03	CM005RL110	L	5	1.01239	-1.09961
20120514E1	L06	MicroSource	01502331	120130-04	F03	CM005RL110	L	6	1.16698	-0.0180265
20120514E1	L07	MicroSource	01505774	120130-02	F04	CM005RL110	L	7	1.50304	0.170076
20120514E1	L08	MicroSource	01503036	120130-04	F04	CM005RL110	L	8	-0.315059	-0.751625
20120514E1	L09	MicroSource	01505762	120130-02	F05	CM005RL110	L	9	1.89288	-0.416176
20120514E1	L10	MicroSource	01503427	120130-04	F05	CM005RL110	L	10	2.66582	0.464769
20120514E1	L11	MicroSource	01505785	120130-02	F06	CM005RL110	L	11	0.387313	-1.22501
20120514E1	L12	MicroSource	01503053	120130-04	F06	CM005RL110	L	12	0.787228	-0.303315
20120514E1	L13	MicroSource	01503226	120130-02	F07	CM005RL110	L	13	3.21024	2.00094
20120514E1	L14	MicroSource	00307080	120130-04	F07	CM005RL110	L	14	1.86599	-1.64511
20120514E1	L15	MicroSource	01500836	120130-02	F08	CM005RL110	L	15	0.968702	-0.848811
20120514E1	L16	MicroSource	01506195	120130-04	F08	CM005RL110	L	16	0.760343	-0.698329
20120514E1	L17	MicroSource	01300019	120130-02	F09	CM005RL110	L	17	0.672966	-0.673249
20120514E1	L18	MicroSource	01506186	120130-04	F09	CM005RL110	L	18	-0.180634	-1.1341
20120514E1	L19	MicroSource	01500639	120130-02	F10	CM005RL110	L	19	-0.627598	-0.447526
20120514E1	L20	MicroSource	01506185	120130-04	F10	CM005RL110	L	20	0.256248	-1.52911
20120514E1	L21	MicroSource	01500999	120130-02	F11	CM005RL110	L	21	-1.02751	-0.538442
20120514E1	L22	MicroSource	01506172	120130-04	F11	CM005RL110	L	22	0.31674	-1.48209
20120514E1	M03	MicroSource	01503733	120130-01	G02	CM005RL110	M	3	-1.58202	-1.0087
20120514E1	M04	MicroSource	01500990	120130-03	G02	CM005RL110	M	4	0.296576	-0.221804
20120514E1	M05	MicroSource	01500841	120130-01	G03	CM005RL110	M	5	0.226002	-2.04953
20120514E1	M06	MicroSource	01505245	120130-03	G03	CM005RL110	M	6	-2.28775	-2.20628
20120514E1	M07	MicroSource	01506073	120130-01	G04	CM005RL110	M	7	-1.96849	-1.57927
20120514E1	M08	MicroSource	01503044	120130-03	G04	CM005RL110	M	8	-0.711614	-1.53538
20120514E1	M09	MicroSource	01502370	120130-01	G05	CM005RL110	M	9	-0.53014	-0.905242
20120514E1	M10	MicroSource	00300565	120130-03	G05	CM005RL110	M	10	-1.21571	-1.21874
20120514E1	M11	MicroSource	01503806	120130-01	G06	CM005RL110	M	11	-16.2243	-8.44187
20120514E1	M12	MicroSource	00210866	120130-03	G06	CM005RL110	M	12	-1.6862	-2.00564
20120514E1	M13	MicroSource	01503628	120130-01	G07	CM005RL110	M	13	-0.473009	-2.92421
20120514E1	M14	MicroSource	01506191	120130-03	G07	CM005RL110	M	14	-20.62	-12.2917
20120514E1	M15	MicroSource	01505779	120130-01	G08	CM005RL110	M	15	-0.231043	-1.59495
20120514E1	M16	MicroSource	01506164	120130-03	G08	CM005RL110	M	16	-0.681368	-1.82067
20120514E1	M17	MicroSource	01506065	120130-01	G09	CM005RL110	M	17	-0.15711	-2.34736
20120514E1	M18	MicroSource	01503325	120130-03	G09	CM005RL110	M	18	-2.29447	-1.60435
20120514E1	M19	MicroSource	01503381	120130-01	G10	CM005RL110	M	19	-0.812433	-1.57614
20120514E1	M20	MicroSource	01506156	120130-03	G10	CM005RL110	M	20	-0.620877	-2.23136
20120514E1	M21	MicroSource	01504511	120130-01	G11	CM005RL110	M	21	-2.52971	-1.99623
20120514E1	M22	MicroSource	01601000	120130-03	G11	CM005RL110	M	22	-2.51963	-2.54487
20120514E1	N03	MicroSource	01501000	120130-02	G02	CM005RL110	N	3	0.138626	-0.851946
20120514E1	N04	MicroSource	01506158	120130-04	G02	CM005RL110	N	4	2.00042	0.662276
20120514E1	N05	MicroSource	01501026	120130-02	G03	CM005RL110	N	5	1.97353	-1.21874
20120514E1	N06	MicroSource	01506155	120130-04	G03	CM005RL110	N	6	0.491492	-0.591738
20120514E1	N07	MicroSource	01502034	120130-02	G04	CM005RL110	N	7	0.420919	-0.438121
20120514E1	N08	MicroSource	01506153	120130-04	G04	CM005RL110	N	8	1.03591	-0.789245
20120514E1	N09	MicroSource	01503108	120130-02	G05	CM005RL110	N	9	0.464607	-1.89905
20120514E1	N10	MicroSource	01506151	120130-04	G05	CM005RL110	N	10	-0.0730937	-1.54165
20120514E1	N11	MicroSource	01502024	120130-02	G06	CM005RL110	N	11	0.0142827	-1.88964
20120514E1	N12	MicroSource	01506125	120130-04	G06	CM005RL110	N	12	1.16698	-1.12469
20120514E1	N13	MicroSource	01502010	120130-02	G07	CM005RL110	N	13	80.7736	74.3294
20120514E1	N14	MicroSource	01506105	120130-04	G07	CM005RL110	N	14	0.602393	-1.63884
20120514E1	N15	MicroSource	01503205	120130-02	G08	CM005RL110	N	15	-0.513336	-0.619953
20120514E1	N16	MicroSource	01502551	120130-04	G08	CM005RL110	N	16	0.807392	-1.79873
20120514E1	N17	MicroSource	01505310	120130-02	G09	CM005RL110	N	17	-0.163831	-1.5636
20120514E1	N18	MicroSource	01506199	120130-04	G09	CM005RL110	N	18	1.16026	-1.53225
20120514E1	N19	MicroSource	01502045	120130-02	G10	CM005RL110	N	19	-0.509976	-1.46955
20120514E1	N20	MicroSource	01506165	120130-04	G10	CM005RL110	N	20	-0.543582	-2.57622
20120514E1	N21	MicroSource	01505740	120130-02	G11	CM005RL110	N	21	-0.473009	-1.86143
20120514E1	N22	MicroSource	01300043	120130-04	G11	CM005RL110	N	22	0.431001	-2.04953
20120514E1	O03	MicroSource	01506049	120130-01	H02	CM005RL110	O	3	1.28124	-0.72968
20120514E1	O04	MicroSource	01505322	120130-03	H02	CM005RL110	O	4	-4.33101	-5.01214
20120514E1	O05	MicroSource	01504520	120130-01	H03	CM005RL110	O	5	2.26927	-0.488282
20120514E1	O06	MicroSource	01503225	120130-03	H03	CM005RL110	O	6	1.78198	-2.12791
20120514E1	O07	MicroSource	01504512	120130-01	H04	CM005RL110	O	7	2.39697	-0.33153
20120514E1	O08	MicroSource	01503822	120130-03	H04	CM005RL110	O	8	3.04557	-0.72968
20120514E1	O09	MicroSource	01504506	120130-01	H05	CM005RL110	O	9	1.84583	-1.72035
20120514E1	O10	MicroSource	01701060	120130-03	H05	CM005RL110	O	10	1.4123	-0.74849
20120514E1	O11	MicroSource	01504508	120130-01	H06	CM005RL110	O	11	1.046	-1.89905
20120514E1	O12	MicroSource	01502245	120130-03	H06	CM005RL110	O	12	2.41713	-1.3849
20120514E1	O13	MicroSource	01504504	120130-01	H07	CM005RL110	O	13	1.30813	-0.447526
20120514E1	O14	MicroSource	01500633	120130-03	H07	CM005RL110	O	14	-0.654483	-1.3849
20120514E1	O15	MicroSource	01504501	120130-01	H08	CM005RL110	O	15	1.78533	-2.67654
20120514E1	O16	MicroSource	01503648	120130-03	H08	CM005RL110	O	16	1.04264	-0.660709
20120514E1	O17	MicroSource	01503080	120130-01	H09	CM005RL110	O	17	1.58034	-1.32847
20120514E1	O18	MicroSource	01503206	120130-03	H09	CM005RL110	O	18	-0.788908	-1.49149
20120514E1	O19	MicroSource	01503222	120130-01	H10	CM005RL110	O	19	1.16698	-1.65451
20120514E1	O20	MicroSource	01500657	120130-03	H10	CM005RL110	O	20	-0.85276	-1.1341
20120514E1	O21					CM005RL110	O	21	1.51649	-2.19061
20120514E1	O22	MicroSource	02300228	120130-03	H11	CM005RL110	O	22	-0.281453	-2.10596
20120514E1	P03	MicroSource	00211175	120130-02	H02	CM005RL110	P	3	2.65238	0.11051
20120514E1	P04	MicroSource	01503006	120130-04	H02	CM005RL110	P	4	5.78785	-1.19993
20120514E1	P05	MicroSource	00310050	120130-02	H03	CM005RL110	P	5	2.26254	-1.04945
20120514E1	P06					CM005RL110	P	6	3.44549	1.65608
20120514E1	P07	MicroSource	00212064	120130-02	H04	CM005RL110	P	7	2.74984	-0.685789
20120514E1	P08	MicroSource	01500647	120130-04	H04	CM005RL110	P	8	1.65427	-0.905242
20120514E1	P09	MicroSource	01503134	120130-02	H05	CM005RL110	P	9	1.21739	-1.36609
20120514E1	P10	MicroSource	01503891	120130-04	H05	CM005RL110	P	10	3.24385	-1.10902
20120514E1	P11	MicroSource	01505167	120130-02	H06	CM005RL110	P	11	1.37198	-0.983618
20120514E1	P12					CM005RL110	P	12	3.07582	-1.46328
20120514E1	P13	MicroSource	01503732	120130-02	H07	CM005RL110	P	13	2.87754	-0.873891
20120514E1	P14					CM005RL110	P	14	1.31485	-0.234344
20120514E1	P15	MicroSource	01506079	120130-02	H08	CM005RL110	P	15	2.62213	-0.206129
20120514E1	P16	MicroSource	01506166	120130-04	H08	CM005RL110	P	16	0.972063	-1.72035
20120514E1	P17	MicroSource	01506085	120130-02	H09	CM005RL110	P	17	0.63936	-1.34101
20120514E1	P18	MicroSource	01506194	120130-04	H09	CM005RL110	P	18	2.5314	-1.62003
20120514E1	P19	MicroSource	01503094	120130-02	H10	CM005RL110	P	19	1.43919	-1.94607
20120514E1	P20					CM005RL110	P	20	0.864522	-1.06826
20120514E1	P21	MicroSource	01506077	120130-02	H11	CM005RL110	P	21	0.961981	-1.64824
20120514E1	P22	MicroSource	01502213	120130-04	H11	CM005RL110	P	22	2.26591	-1.60749
20120514F1	A03	MicroSource	01500372	120121-01	A02	CM006RL110	A	3	1.39834	1.08625
20120514F1	A04	MicroSource	01502359	120121-03	A02	CM006RL110	A	4	2.03411	-0.429683
20120514F1	A05	MicroSource	01505032	120121-01	A03	CM006RL110	A	5	1.765	-0.229229
20120514F1	A06	MicroSource	01500145	120121-03	A03	CM006RL110	A	6	3.0332	-1.38184
20120514F1	A07	MicroSource	01504280	120121-01	A04	CM006RL110	A	7	0.917296	-0.821193
20120514F1	A08	MicroSource	01500280	120121-03	A04	CM006RL110	A	8	1.86592	-0.357645
20120514F1	A09	MicroSource	01301015	120121-01	A05	CM006RL110	A	9	1.68427	-0.182248
20120514F1	A10	MicroSource	01505973	120121-03	A05	CM006RL110	A	10	2.63962	-1.08429
20120514F1	A11	MicroSource	00310035	120121-01	A06	CM006RL110	A	11	0.772648	-0.902627
20120514F1	A12	MicroSource	01500778	120121-03	A06	CM006RL110	A	12	1.6439	-1.49459
20120514F1	A13	MicroSource	01500377	120121-01	A07	CM006RL110	A	13	4.19711	-0.132135
20120514F1	A14	MicroSource	01500568	120121-03	A07	CM006RL110	A	14	2.11148	-1.22836
20120514F1	A15	MicroSource	01500380	120121-01	A08	CM006RL110	A	15	1.53626	-0.332588
20120514F1	A16	MicroSource	01500583	120121-03	A08	CM006RL110	A	16	-0.535913	-0.818061
20120514F1	A17	MicroSource	01500381	120121-01	A09	CM006RL110	A	17	1.14268	-0.0350402
20120514F1	A18	MicroSource	01500594	120121-03	A09	CM006RL110	A	18	1.72127	-0.614476
20120514F1	A19	MicroSource	01500382	120121-01	A10	CM006RL110	A	19	1.89619	-2.19618
20120514F1	A20	MicroSource	01502041	120121-03	A10	CM006RL110	A	20	2.76072	0.0651865
20120514F1	A21	MicroSource	00330001	120121-01	A11	CM006RL110	A	21	-17.9139	-11.298
20120514F1	A22	MicroSource	01506154	120121-03	A11	CM006RL110	A	22	1.61026	-1.18765
20120514F1	B03	MicroSource	01501137	120121-02	A02	CM006RL110	B	3	1.96011	-0.890099
20120514F1	B04	MicroSource	01503892	120121-04	A02	CM006RL110	B	4	2.70353	-0.291871
20120514F1	B05	MicroSource	01502267	120121-02	A03	CM006RL110	B	5	2.22922	-1.28474
20120514F1	B06	MicroSource	00307023	120121-04	A03	CM006RL110	B	6	2.36378	-0.764816
20120514F1	B07	MicroSource	01502271	120121-02	A04	CM006RL110	B	7	2.50842	-0.467268
20120514F1	B08	MicroSource	01502355	120121-04	A04	CM006RL110	B	8	1.802	-0.119607
20120514F1	B09	MicroSource	01502272	120121-02	A05	CM006RL110	B	9	0.883657	-1.35051
20120514F1	B10	MicroSource	00310039	120121-04	A05	CM006RL110	B	10	3.25521	-0.0851535
20120514F1	B11	MicroSource	01501142	120121-02	A06	CM006RL110	B	11	1.42188	-1.42255
20120514F1	B12	MicroSource	00310040	120121-04	A06	CM006RL110	B	12	1.69436	-0.918288
20120514F1	B13	MicroSource	01502273	120121-02	A07	CM006RL110	B	13	2.32005	-0.764816
20120514F1	B14	MicroSource	01505715	120121-04	A07	CM006RL110	B	14	0.819743	-1.15946
20120514F1	B15	MicroSource	01501144	120121-02	A08	CM006RL110	B	15	1.6439	-0.298135
20120514F1	B16	MicroSource	00330002	120121-04	A08	CM006RL110	B	16	1.34115	-1.78274
20120514F1	B17	MicroSource	01501147	120121-02	A09	CM006RL110	B	17	1.06194	-1.61048
20120514F1	B18	MicroSource	01505777	120121-04	A09	CM006RL110	B	18	1.60017	-0.520513
20120514F1	B19	MicroSource	01502274	120121-02	A10	CM006RL110	B	19	1.51944	-0.808665
20120514F1	B20	MicroSource	01500448	120121-04	A10	CM006RL110	B	20	0.580905	-1.29414
20120514F1	B21	MicroSource	01502275	120121-02	A11	CM006RL110	B	21	0.866838	-0.739759
20120514F1	B22	MicroSource	00330082	120121-04	A11	CM006RL110	B	22	-0.290347	-1.18138
20120514F1	C03	MicroSource	01500390	120121-01	B02	CM006RL110	C	3	-0.00777904	-0.918288
20120514F1	C04	MicroSource	01502195	120121-03	B02	CM006RL110	C	4	0.957663	-0.943345
20120514F1	C05	MicroSource	01300030	120121-01	B03	CM006RL110	C	5	0.940844	0.0119411
20120514F1	C06	MicroSource	01503092	120121-03	B03	CM006RL110	C	6	1.65736	-0.248022
20120514F1	C07	MicroSource	01500396	120121-01	B04	CM006RL110	C	7	1.66408	-1.77022
20120514F1	C08	MicroSource	01503101	120121-03	B04	CM006RL110	C	8	1.42188	-1.5541
20120514F1	C09	MicroSource	01500397	120121-01	B05	CM006RL110	C	9	1.02831	-0.201041
20120514F1	C10	MicroSource	01503428	120121-03	B05	CM006RL110	C	10	1.49253	-1.76708
20120514F1	C11	MicroSource	01500398	120121-01	B06	CM006RL110	C	11	3.33258	-0.987194
20120514F1	C12	MicroSource	01503722	120121-03	B06	CM006RL110	C	12	2.99956	-2.09908
20120514F1	C13	MicroSource	01500399	120121-01	B07	CM006RL110	C	13	4.79588	2.14176
20120514F1	C14	MicroSource	01503932	120121-03	B07	CM006RL110	C	14	1.23687	-1.57916
20120514F1	C15	MicroSource	01505024	120121-01	B08	CM006RL110	C	15	1.62035	-1.16885
20120514F1	C16	MicroSource	01503935	120121-03	B08	CM006RL110	C	16	1.23014	-1.53531
20120514F1	C17	MicroSource	01502341	120121-01	B09	CM006RL110	C	17	2.21577	-2.10222
20120514F1	C18	MicroSource	01503975	120121-03	B09	CM006RL110	C	18	2.34023	-1.33799
20120514F1	C19	MicroSource	01502374	120121-01	B10	CM006RL110	C	19	1.00139	-0.858778
20120514F1	C20	MicroSource	01503977	120121-03	B10	CM006RL110	C	20	1.67418	-0.814929
20120514F1	C21	MicroSource	01500406	120121-01	B11	CM006RL110	C	21	0.456441	-1.28161
20120514F1	C22	MicroSource	01503692	120121-03	B11	CM006RL110	C	22	0.974483	-1.39123
20120514F1	D03	MicroSource	01501150	120121-02	B02	CM006RL110	D	3	1.58671	0.105904
20120514F1	D04	MicroSource	01500252	120121-04	B02	CM006RL110	D	4	1.66072	-0.0507006
20120514F1	D05	MicroSource	01502318	120121-02	B03	CM006RL110	D	5	1.52953	-0.720967
20120514F1	D06	MicroSource	01505656	120121-04	B03	CM006RL110	D	6	1.78519	-0.554966
20120514F1	D07	MicroSource	01501153	120121-02	B04	CM006RL110	D	7	1.75155	0.00254482
20120514F1	D08	MicroSource	01505485	120121-04	B04	CM006RL110	D	8	1.4387	-0.614476
20120514F1	D09	MicroSource	01500358	120121-02	B05	CM006RL110	D	9	-0.512366	-2.01452
20120514F1	D10	MicroSource	01502345	120121-04	B05	CM006RL110	D	10	1.10231	30.5059
20120514F1	D11	MicroSource	01501155	120121-02	B06	CM006RL110	D	11	-0.276892	-1.30353
20120514F1	D12	MicroSource	01505348	120121-04	B06	CM006RL110	D	12	0.183964	-1.66686
20120514F1	D13	MicroSource	01501156	120121-02	B07	CM006RL110	D	13	0.220967	-0.605079
20120514F1	D14	MicroSource	01503864	120121-04	B07	CM006RL110	D	14	-0.216341	-0.542438
20120514F1	D15	MicroSource	01502042	120121-02	B08	CM006RL110	D	15	1.2436	-2.65346
20120514F1	D16	MicroSource	01500102	120121-04	B08	CM006RL110	D	16	0.728917	-0.623872
20120514F1	D17	MicroSource	01501171	120121-02	B09	CM006RL110	D	17	0.167144	-1.21584
20120514F1	D18	MicroSource	01500103	120121-04	B09	CM006RL110	D	18	1.36806	1.84734
20120514F1	D19	MicroSource	01505458	120121-02	B10	CM006RL110	D	19	1.17632	-1.7984
20120514F1	D20	MicroSource	01500104	120121-04	B10	CM006RL110	D	20	0.453077	-1.93622
20120514F1	D21	MicroSource	01501175	120121-02	B11	CM006RL110	D	21	-0.256708	-0.949609
20120514F1	D22	MicroSource	01500105	120121-04	B11	CM006RL110	D	22	0.0393157	-1.96127
20120514F1	E03	MicroSource	01500412	120121-01	C02	CM006RL110	E	3	-1.82093	-1.24089
20120514F1	E04	MicroSource	01506104	120121-03	C02	CM006RL110	E	4	-0.223069	-0.432815
20120514F1	E05	MicroSource	01501021	120121-01	C03	CM006RL110	E	5	-0.0885129	-0.667721
20120514F1	E06	MicroSource	01504094	120121-03	C03	CM006RL110	E	6	-1.59218	-2.70984
20120514F1	E07	MicroSource	01500415	120121-01	C04	CM006RL110	E	7	0.725553	-0.232361
20120514F1	E08	MicroSource	01504105	120121-03	C04	CM006RL110	E	8	6.33992	1.55919
20120514F1	E09	MicroSource	01501108	120121-01	C05	CM006RL110	E	9	-0.478726	-1.74516
20120514F1	E10	MicroSource	01502006	120121-03	C05	CM006RL110	E	10	0.325248	-0.154059
20120514F1	E11	MicroSource	01505396	120121-01	C06	CM006RL110	E	11	-	-
20120514F1	E12	MicroSource	01503978	120121-03	C06	CM006RL110	E	12	0.405982	-1.25655
20120514F1	E13	MicroSource	01505420	120121-01	C07	CM006RL110	E	13	241.75	240.609
20120514F1	E14	MicroSource	01503611	120121-03	C07	CM006RL110	E	14	0.368979	-0.367041
20120514F1	E15	MicroSource	01505399	120121-01	C08	CM006RL110	E	15	0.136869	-1.18765
20120514F1	E16	MicroSource	01504148	120121-03	C08	CM006RL110	E	16	0.173872	-0.727231
20120514F1	E17	MicroSource	01505519	120121-01	C09	CM006RL110	E	17	5.23656	2.98429
20120514F1	E18	MicroSource	01504152	120121-03	C09	CM006RL110	E	18	1.11913	-0.908892
20120514F1	E19	MicroSource	01505572	120121-01	C10	CM006RL110	E	19	-0.209614	-0.201041
20120514F1	E20	MicroSource	01504184	120121-03	C10	CM006RL110	E	20	0.402618	-1.50086
20120514F1	E21	MicroSource	01500425	120121-01	C11	CM006RL110	E	21	2.51852	-0.191644
20120514F1	E22	MicroSource	01503078	120121-03	C11	CM006RL110	E	22	-1.12796	-0.630136
20120514F1	F03	MicroSource	01503874	120121-02	C02	CM006RL110	F	3	-1.03041	-1.15319
20120514F1	F04	MicroSource	01500107	120121-04	C02	CM006RL110	F	4	0.984574	-1.30667
20120514F1	F05	MicroSource	01502357	120121-02	C03	CM006RL110	F	5	-1.66282	-1.61987
20120514F1	F06	MicroSource	01500108	120121-04	C03	CM006RL110	F	6	1.0384	-0.702174
20120514F1	F07	MicroSource	01501187	120121-02	C04	CM006RL110	F	7	0.338704	-1.1438
20120514F1	F08	MicroSource	01500109	120121-04	C04	CM006RL110	F	8	1.92311	-0.874439
20120514F1	F09	MicroSource	01501196	120121-02	C05	CM006RL110	F	9	0.47326	-0.645796
20120514F1	F10	MicroSource	01500110	120121-04	C05	CM006RL110	F	10	0.752465	-1.35678
20120514F1	F11	MicroSource	01501200	120121-02	C06	CM006RL110	F	11	-0.219705	-0.442211
20120514F1	F12	MicroSource	01500111	120121-04	C06	CM006RL110	F	12	0.631364	-0.733495
20120514F1	F13	MicroSource	01501201	120121-02	C07	CM006RL110	F	13	-1.25243	-0.645796
20120514F1	F14	MicroSource	01500112	120121-04	C07	CM006RL110	F	14	-0.455179	-0.677117
20120514F1	F15	MicroSource	01501202	120121-02	C08	CM006RL110	F	15	-0.650286	-1.56663
20120514F1	F16	MicroSource	01500114	120121-04	C08	CM006RL110	F	16	-1.58882	-0.780476
20120514F1	F17	MicroSource	01506183	120121-02	C09	CM006RL110	F	17	0.493443	-0.589419
20120514F1	F18	MicroSource	01500115	120121-04	C09	CM006RL110	F	18	-0.593099	-0.514249
20120514F1	F19	MicroSource	01502281	120121-02	C10	CM006RL110	F	19	1.14604	0.0150732
20120514F1	F20	MicroSource	01500116	120121-04	C10	CM006RL110	F	20	-0.912671	-1.35678
20120514F1	F21	MicroSource	01501215	120121-02	C11	CM006RL110	F	21	-0.434996	-0.702174
20120514F1	F22	MicroSource	01500117	120121-04	C11	CM006RL110	F	22	-0.620011	-0.739759
20120514F1	G03	MicroSource	01500611	120121-01	D02	CM006RL110	G	3	-2.04631	-0.26055
20120514F1	G04	MicroSource	01504229	120121-03	D02	CM006RL110	G	4	-1.7772	-0.999722
20120514F1	G05	MicroSource	01502424	120121-01	D03	CM006RL110	G	5	-0.478726	0.347074
20120514F1	G06	MicroSource	01504211	120121-03	D03	CM006RL110	G	6	-2.11022	-0.633268
20120514F1	G07	MicroSource	01502414	120121-01	D04	CM006RL110	G	7	0.745737	0.660282
20120514F1	G08	MicroSource	01504231	120121-03	D04	CM006RL110	G	8	-0.280256	-0.066361
20120514F1	G09	MicroSource	01505688	120121-01	D05	CM006RL110	G	9	0.883657	0.929642
20120514F1	G10	MicroSource	01506123	120121-03	D05	CM006RL110	G	10	-0.757931	-0.122739
20120514F1	G11	MicroSource	01500436	120121-01	D06	CM006RL110	G	11	0.00231269	0.34081
20120514F1	G12	MicroSource	01506101	120121-03	D06	CM006RL110	G	12	0.220967	-0.673985
20120514F1	G13	MicroSource	01500437	120121-01	D07	CM006RL110	G	13	1.41515	0.976623
20120514F1	G14	MicroSource	01500649	120121-03	D07	CM006RL110	G	14	-0.223069	-1.19704
20120514F1	G15	MicroSource	01500439	120121-01	D08	CM006RL110	G	15	1.87601	0.820019
20120514F1	G16	MicroSource	01504263	120121-03	D08	CM006RL110	G	16	-0.512366	-1.56663
20120514F1	G17	MicroSource	01500440	120121-01	D09	CM006RL110	G	17	-0.310531	-0.764816
20120514F1	G18	MicroSource	01504268	120121-03	D09	CM006RL110	G	18	-0.397993	-0.00685143
20120514F1	G19	MicroSource	01301003	120121-01	D10	CM006RL110	G	19	0.10323	-0.855646
20120514F1	G20	MicroSource	01505020	120121-03	D10	CM006RL110	G	20	-0.0515099	-0.962137
20120514F1	G21	MicroSource	01505206	120121-01	D11	CM006RL110	G	21	0.352159	-0.201041
20120514F1	G22	MicroSource	00300618	120121-03	D11	CM006RL110	G	22	1.33442	-1.51338
20120514F1	H03	MicroSource	01501217	120121-02	D02	CM006RL110	H	3	0.594361	0.488018
20120514F1	H04	MicroSource	01500119	120121-04	D02	CM006RL110	H	4	-5.25548	-3.6432
20120514F1	H05	MicroSource	01504078	120121-02	D03	CM006RL110	H	5	0.10323	0.704132
20120514F1	H06	MicroSource	01500120	120121-04	D03	CM006RL110	H	6	1.02158	-0.00998352
20120514F1	H07	MicroSource	01504088	120121-02	D04	CM006RL110	H	7	2.2494	-0.338852
20120514F1	H08	MicroSource	01500122	120121-04	D04	CM006RL110	H	8	0.702006	-0.197909
20120514F1	H09	MicroSource	01502020	120121-02	D05	CM006RL110	H	9	-0.778114	-0.968401
20120514F1	H10	MicroSource	01500123	120121-04	D05	CM006RL110	H	10	-1.2457	0.337678
20120514F1	H11	MicroSource	01502021	120121-02	D06	CM006RL110	H	11	0.513627	0.635226
20120514F1	H12	MicroSource	01500138	120121-04	D06	CM006RL110	H	12	-0.465271	-2.36844
20120514F1	H13	MicroSource	01502025	120121-02	D07	CM006RL110	H	13	-0.0548738	-1.56037
20120514F1	H14	MicroSource	01500127	120121-04	D07	CM006RL110	H	14	6.08426	1.38379
20120514F1	H15	MicroSource	01502026	120121-02	D08	CM006RL110	H	15	-1.15151	-0.379569
20120514F1	H16	MicroSource	01500128	120121-04	D08	CM006RL110	H	16	-1.49463	-1.30667
20120514F1	H17	MicroSource	01502028	120121-02	D09	CM006RL110	H	17	-1.05395	-0.551834
20120514F1	H18	MicroSource	01500126	120121-04	D09	CM006RL110	H	18	-0.842029	-0.814929
20120514F1	H19	MicroSource	01502030	120121-02	D10	CM006RL110	H	19	-0.788206	-0.633268
20120514F1	H20	MicroSource	01500129	120121-04	D10	CM006RL110	H	20	-2.6619	-0.617608
20120514F1	H21	MicroSource	01502288	120121-02	D11	CM006RL110	H	21	0.0561352	-1.82033
20120514F1	H22	MicroSource	01506174	120121-04	D11	CM006RL110	H	22	-0.683925	0.0244694
20120514F1	I03	MicroSource	01500430	120121-01	E02	CM006RL110	I	3	-2.35579	-1.16885
20120514F1	I04	MicroSource	01505022	120121-03	E02	CM006RL110	I	4	-0.932854	-0.974665
20120514F1	I05	MicroSource	01500444	120121-01	E03	CM006RL110	I	5	-4.86526	-1.68252
20120514F1	I06	MicroSource	01500675	120121-03	E03	CM006RL110	I	6	-1.02368	-0.843118
20120514F1	I07	MicroSource	01500445	120121-01	E04	CM006RL110	I	7	-1.25579	-0.830589
20120514F1	I08	MicroSource	02300292	120121-03	E04	CM006RL110	I	8	-1.26924	-0.116474
20120514F1	I09	MicroSource	01502422	120121-01	E05	CM006RL110	I	9	-2.02949	-0.761684
20120514F1	I10	MicroSource	01505209	120121-03	E05	CM006RL110	I	10	-0.916035	-0.86191
20120514F1	I11	MicroSource	01301011	120121-01	E06	CM006RL110	I	11	-1.37689	-0.955873
20120514F1	I12	MicroSource	00200331	120121-03	E06	CM006RL110	I	12	-2.19096	-0.833722
20120514F1	I13	MicroSource	01505500	120121-01	E07	CM006RL110	I	13	-2.27169	-1.45387
20120514F1	I14	MicroSource	00300024	120121-03	E07	CM006RL110	I	14	-1.63591	-0.00685143
20120514F1	I15	MicroSource	01500451	120121-01	E08	CM006RL110	I	15	-1.00013	-0.100814
20120514F1	I16	MicroSource	01505321	120121-03	E08	CM006RL110	I	16	-3.36833	11.5255
20120514F1	I17	MicroSource	01502391	120121-01	E09	CM006RL110	I	17	-1.81756	-0.229229
20120514F1	I18	MicroSource	01506124	120121-03	E09	CM006RL110	I	18	-2.60135	-1.64806
20120514F1	I19	MicroSource	01500455	120121-01	E10	CM006RL110	I	19	-1.63928	-0.536174
20120514F1	I20	MicroSource	01502351	120121-03	E10	CM006RL110	I	20	-1.59218	-1.28787
20120514F1	I21	MicroSource	01500442	120121-01	E11	CM006RL110	I	21	-1.7301	-1.3881
20120514F1	I22	MicroSource	01505292	120121-03	E11	CM006RL110	I	22	-0.280256	-0.811797
20120514F1	J03	MicroSource	01502286	120121-02	E02	CM006RL110	J	3	-1.75701	0.287565
20120514F1	J04	MicroSource	01500131	120121-04	E02	CM006RL110	J	4	-0.445087	0.296961
20120514F1	J05	MicroSource	01502289	120121-02	E03	CM006RL110	J	5	-0.845393	-0.354513
20120514F1	J06	MicroSource	01505976	120121-04	E03	CM006RL110	J	6	-2.16741	-0.445343
20120514F1	J07	MicroSource	01505394	120121-02	E04	CM006RL110	J	7	0.577541	-0.54557
20120514F1	J08	MicroSource	01500133	120121-04	E04	CM006RL110	J	8	0.140233	0.278168
20120514F1	J09	MicroSource	01505539	120121-02	E05	CM006RL110	J	9	-2.16741	-1.00285
20120514F1	J10	MicroSource	01500134	120121-04	E05	CM006RL110	J	10	-1.10441	-1.41316
20120514F1	J11	MicroSource	01502300	120121-02	E06	CM006RL110	J	11	-1.52827	-0.661457
20120514F1	J12	MicroSource	01500135	120121-04	E06	CM006RL110	J	12	-2.30869	-1.50086
20120514F1	J13	MicroSource	01502301	120121-02	E07	CM006RL110	J	13	-2.51726	-0.354513
20120514F1	J14	MicroSource	01500136	120121-04	E07	CM006RL110	J	14	-1.41389	-1.1344
20120514F1	J15	MicroSource	01505407	120121-02	E08	CM006RL110	J	15	-1.81083	0.2813
20120514F1	J16	MicroSource	01500124	120121-04	E08	CM006RL110	J	16	-2.67872	-1.09682
20120514F1	J17	MicroSource	01502044	120121-02	E09	CM006RL110	J	17	-1.10105	-1.83912
20120514F1	J18	MicroSource	01500137	120121-04	E09	CM006RL110	J	18	-0.300439	-0.163456
20120514F1	J19	MicroSource	01502046	120121-02	E10	CM006RL110	J	19	-0.0885129	-0.708438
20120514F1	J20	MicroSource	01500139	120121-04	E10	CM006RL110	J	20	-0.0817851	-2.77561
20120514F1	J21	MicroSource	01505720	120121-02	E11	CM006RL110	J	21	-1.8142	-1.46954
20120514F1	J22	MicroSource	01500141	120121-04	E11	CM006RL110	J	22	-1.76374	-2.15546
20120514F1	K03	MicroSource	01505443	120121-01	F02	CM006RL110	K	3	-2.1035	-0.821193
20120514F1	K04	MicroSource	01505366	120121-03	F02	CM006RL110	K	4	0.251242	-0.752287
20120514F1	K05	MicroSource	01504914	120121-01	F03	CM006RL110	K	5	-2.06986	-1.17825
20120514F1	K06	MicroSource	00211468	120121-03	F03	CM006RL110	K	6	0.0224961	3.0532
20120514F1	K07	MicroSource	01506196	120121-01	F04	CM006RL110	K	7	-1.80747	-1.2315
20120514F1	K08	MicroSource	01505376	120121-03	F04	CM006RL110	K	8	-1.46772	0.682207
20120514F1	K09	MicroSource	01502410	120121-01	F05	CM006RL110	K	9	-1.72337	-0.435947
20120514F1	K10	MicroSource	01505385	120121-03	F05	CM006RL110	K	10	-0.49891	-1.35991
20120514F1	K11	MicroSource	01500472	120121-01	F06	CM006RL110	K	11	-0.953038	0.121564
20120514F1	K12	MicroSource	00300029	120121-03	F06	CM006RL110	K	12	-1.01022	-0.633268
20120514F1	K13	MicroSource	01505544	120121-01	F07	CM006RL110	K	13	0.826471	0.804358
20120514F1	K14	MicroSource	01505389	120121-03	F07	CM006RL110	K	14	-1.6561	-0.539306
20120514F1	K15	MicroSource	01505446	120121-01	F08	CM006RL110	K	15	-0.0649655	-1.26595
20120514F1	K16	MicroSource	01505392	120121-03	F08	CM006RL110	K	16	-1.14142	1.1207
20120514F1	K17	MicroSource	01500477	120121-01	F09	CM006RL110	K	17	-1.52827	-1.45701
20120514F1	K18	MicroSource	01505801	120121-03	F09	CM006RL110	K	18	-1.85457	0.0557902
20120514F1	K19	MicroSource	01505553	120121-01	F10	CM006RL110	K	19	-2.06986	0.400319
20120514F1	K20	MicroSource	01505802	120121-03	F10	CM006RL110	K	20	-1.19188	-0.686514
20120514F1	K21	MicroSource	01500482	120121-01	F11	CM006RL110	K	21	-1.64937	-0.608212
20120514F1	K22	MicroSource	01505803	120121-03	F11	CM006RL110	K	22	-1.24233	-0.141531
20120514F1	L03	MicroSource	01502320	120121-02	F02	CM006RL110	L	3	-0.428268	-0.18538
20120514F1	L04	MicroSource	01500143	120121-04	F02	CM006RL110	L	4	-0.727656	-0.163456
20120514F1	L05	MicroSource	01502314	120121-02	F03	CM006RL110	L	5	-2.01603	0.322017
20120514F1	L06	MicroSource	01500144	120121-04	F03	CM006RL110	L	6	0.759192	-0.75542
20120514F1	L07	MicroSource	01505347	120121-02	F04	CM006RL110	L	7	-1.44417	-0.689646
20120514F1	L08	MicroSource	01500146	120121-04	F04	CM006RL110	L	8	0.0191322	0.00254482
20120514F1	L09	MicroSource	01504174	120121-02	F05	CM006RL110	L	9	-	-
20120514F1	L10	MicroSource	01500147	120121-04	F05	CM006RL110	L	10	-2.31542	-0.382701
20120514F1	L11	MicroSource	01505306	120121-02	F06	CM006RL110	L	11	-0.519093	-0.304399
20120514F1	L12	MicroSource	01500148	120121-04	F06	CM006RL110	L	12	1.3176	-0.868174
20120514F1	L13	MicroSource	01505742	120121-02	F07	CM006RL110	L	13	-0.620011	-0.611344
20120514F1	L14	MicroSource	01500151	120121-04	F07	CM006RL110	L	14	-2.2616	-0.717835
20120514F1	L15	MicroSource	01506188	120121-02	F08	CM006RL110	L	15	1.23014	-0.41089
20120514F1	L16	MicroSource	01500152	120121-04	F08	CM006RL110	L	16	-1.90166	0.400319
20120514F1	L17	MicroSource	01505397	120121-02	F09	CM006RL110	L	17	-0.895851	-0.504853
20120514F1	L18	MicroSource	01500155	120121-04	F09	CM006RL110	L	18	-0.0784211	-1.15633
20120514F1	L19	MicroSource	01505270	120121-02	F10	CM006RL110	L	19	-0.122152	0.13096
20120514F1	L20	MicroSource	01500156	120121-04	F10	CM006RL110	L	20	-0.79157	-0.802401
20120514F1	L21	MicroSource	01500401	120121-02	F11	CM006RL110	L	21	-0.720928	-0.598815
20120514F1	L22	MicroSource	01500157	120121-04	F11	CM006RL110	L	22	-0.899215	0.0714507
20120514F1	M03	MicroSource	01501010	120121-01	G02	CM006RL110	M	3	-2.74937	-1.08116
20120514F1	M04	MicroSource	01505811	120121-03	G02	CM006RL110	M	4	-2.78301	-1.00912
20120514F1	M05	MicroSource	01501011	120121-01	G03	CM006RL110	M	5	-2.96802	-1.95501
20120514F1	M06	MicroSource	01505814	120121-03	G03	CM006RL110	M	6	-3.20013	-0.746023
20120514F1	M07	MicroSource	01501015	120121-01	G04	CM006RL110	M	7	-3.71481	-1.0655
20120514F1	M08	MicroSource	01505816	120121-03	G04	CM006RL110	M	8	-2.48362	-1.67625
20120514F1	M09	MicroSource	00211425	120121-01	G05	CM006RL110	M	9	-3.34814	-0.226097
20120514F1	M10	MicroSource	01505820	120121-03	G05	CM006RL110	M	10	-	-
20120514F1	M11	MicroSource	01501016	120121-01	G06	CM006RL110	M	11	9.84511	11.9295
20120514F1	M12	MicroSource	02300176	120121-03	G06	CM006RL110	M	12	-1.43744	-1.42255
20120514F1	M13	MicroSource	01500262	120121-01	G07	CM006RL110	M	13	-3.62735	-1.52591
20120514F1	M14	MicroSource	01500680	120121-03	G07	CM006RL110	M	14	-3.5567	-0.313796
20120514F1	M15	MicroSource	01501103	120121-01	G08	CM006RL110	M	15	-2.69218	-1.53531
20120514F1	M16	MicroSource	01503432	120121-03	G08	CM006RL110	M	16	-2.57108	-0.843118
20120514F1	M17	MicroSource	01502343	120121-01	G09	CM006RL110	M	17	-4.49524	-1.90176
20120514F1	M18	MicroSource	01505818	120121-03	G09	CM006RL110	M	18	-3.17995	-0.924552
20120514F1	M19	MicroSource	01503207	120121-01	G10	CM006RL110	M	19	-3.00166	-1.13753
20120514F1	M20	MicroSource	02300241	120121-03	G10	CM006RL110	M	20	-3.35151	-0.301267
20120514F1	M21	MicroSource	01501109	120121-01	G11	CM006RL110	M	21	-1.26924	-0.370173
20120514F1	M22	MicroSource	02300332	120121-03	G11	CM006RL110	M	22	-3.49952	-2.21497
20120514F1	N03	MicroSource	02300219	120121-02	G02	CM006RL110	N	3	-0.229797	1.64062
20120514F1	N04	MicroSource	01500158	120121-04	G02	CM006RL110	N	4	-1.56527	0.375263
20120514F1	N05	MicroSource	02300009	120121-02	G03	CM006RL110	N	5	-0.478726	0.591377
20120514F1	N06	MicroSource	01500159	120121-04	G03	CM006RL110	N	6	-2.66863	0.0432619
20120514F1	N07	MicroSource	02300061	120121-02	G04	CM006RL110	N	7	-17.3521	-9.7445
20120514F1	N08	MicroSource	01500160	120121-04	G04	CM006RL110	N	8	-2.48025	-1.1438
20120514F1	N09	MicroSource	01504829	120121-02	G05	CM006RL110	N	9	-3.31114	-1.1438
20120514F1	N10	MicroSource	01500161	120121-04	G05	CM006RL110	N	10	-2.65518	-0.273079
20120514F1	N11	MicroSource	01506193	120121-02	G06	CM006RL110	N	11	-1.74356	-0.429683
20120514F1	N12	MicroSource	01500162	120121-04	G06	CM006RL110	N	12	-2.48025	-0.730363
20120514F1	N13	MicroSource	01505880	120121-02	G07	CM006RL110	N	13	-2.51053	-0.62074
20120514F1	N14	MicroSource	01500163	120121-04	G07	CM006RL110	N	14	-1.27597	-0.144663
20120514F1	N15	MicroSource	01506192	120121-02	G08	CM006RL110	N	15	-4.12521	-0.570627
20120514F1	N16	MicroSource	01500165	120121-04	G08	CM006RL110	N	16	-1.62582	-0.987194
20120514F1	N17	MicroSource	01505113	120121-02	G09	CM006RL110	N	17	-1.3668	-0.75542
20120514F1	N18	MicroSource	01500166	120121-04	G09	CM006RL110	N	18	-2.0564	-0.0569648
20120514F1	N19	MicroSource	01501140	120121-02	G10	CM006RL110	N	19	-3.20013	-1.62301
20120514F1	N20	MicroSource	01500167	120121-04	G10	CM006RL110	N	20	1.55307	0.412848
20120514F1	N21	MicroSource	01301016	120121-02	G11	CM006RL110	N	21	-2.81328	-0.761684
20120514F1	N22	MicroSource	01500168	120121-04	G11	CM006RL110	N	22	-1.15487	-0.0820214
20120514F1	O03	MicroSource	01501110	120121-01	H02	CM006RL110	O	3	-2.85365	-0.617608
20120514F1	O04	MicroSource	02300205	120121-03	H02	CM006RL110	O	4	-0.529185	0.246847
20120514F1	O05	MicroSource	01504282	120121-01	H03	CM006RL110	O	5	2.56225	1.67508
20120514F1	O06	MicroSource	01503221	120121-03	H03	CM006RL110	O	6	-1.15824	0.79183
20120514F1	O07	MicroSource	01504818	120121-01	H04	CM006RL110	O	7	0.409346	0.296961
20120514F1	O08	MicroSource	01503721	120121-03	H04	CM006RL110	O	8	-0.394629	0.249979
20120514F1	O09	MicroSource	01502264	120121-01	H05	CM006RL110	O	9	-0.677197	1.28043
20120514F1	O10	MicroSource	00300548	120121-03	H05	CM006RL110	O	10	-2.09677	0.177942
20120514F1	O11	MicroSource	01501119	120121-01	H06	CM006RL110	O	11	-1.54509	0.237451
20120514F1	O12	MicroSource	00300034	120121-03	H06	CM006RL110	O	12	-3.17995	-0.818061
20120514F1	O13	MicroSource	01502269	120121-01	H07	CM006RL110	O	13	-0.932854	0.528735
20120514F1	O14	MicroSource	01503240	120121-03	H07	CM006RL110	O	14	-3.06221	-0.84625
20120514F1	O15	MicroSource	01501127	120121-01	H08	CM006RL110	O	15	-0.865576	-0.348249
20120514F1	O16	MicroSource	01506067	120121-03	H08	CM006RL110	O	16	-0.640194	0.046394
20120514F1	O17	MicroSource	01505497	120121-01	H09	CM006RL110	O	17	-0.196158	0.381527
20120514F1	O18	MicroSource	01505725	120121-03	H09	CM006RL110	O	18	-1.09769	-0.288739
20120514F1	O19	MicroSource	01501134	120121-01	H10	CM006RL110	O	19	-1.41053	0.550659
20120514F1	O20	MicroSource	01502113	120121-03	H10	CM006RL110	O	20	-3.09585	-0.984062
20120514F1	O21	MicroSource	01505462	120121-01	H11	CM006RL110	O	21	10.6491	10.7456
20120514F1	O22	MicroSource	01504218	120121-03	H11	CM006RL110	O	22	-5.96526	-3.1546
20120514F1	P03	MicroSource	01506086	120121-02	H02	CM006RL110	P	3	-0.805026	1.02987
20120514F1	P04	MicroSource	01500169	120121-04	H02	CM006RL110	P	4	1.99038	-0.852514
20120514F1	P05	MicroSource	01506069	120121-02	H03	CM006RL110	P	5	-1.21879	0.782434
20120514F1	P06	MicroSource	01500171	120121-04	H03	CM006RL110	P	6	0.449713	1.71893
20120514F1	P07	MicroSource	01506082	120121-02	H04	CM006RL110	P	7	-1.30288	1.09564
20120514F1	P08	MicroSource	01500172	120121-04	H04	CM006RL110	P	8	-1.5249	-0.868174
20120514F1	P09	MicroSource	01506157	120121-02	H05	CM006RL110	P	9	-2.56099	-0.028776
20120514F1	P10	MicroSource	01500173	120121-04	H05	CM006RL110	P	10	-1.06741	0.209262
20120514F1	P11	MicroSource	01505438	120121-02	H06	CM006RL110	P	11	0.597725	-1.24716
20120514F1	P12	MicroSource	01500174	120121-04	H06	CM006RL110	P	12	0.76592	0.228055
20120514F1	P13	MicroSource	01505122	120121-02	H07	CM006RL110	P	13	-1.39707	0.159149
20120514F1	P14	MicroSource	01500175	120121-04	H07	CM006RL110	P	14	-1.572	1.06745
20120514F1	P15	MicroSource	01505271	120121-02	H08	CM006RL110	P	15	-2.70227	-0.0976819
20120514F1	P16	MicroSource	01500177	120121-04	H08	CM006RL110	P	16	-5.1882	-4.11615
20120514F1	P17	MicroSource	01505759	120121-02	H09	CM006RL110	P	17	0.0965022	0.390923
20120514F1	P18	MicroSource	01301023	120121-04	H09	CM006RL110	P	18	-2.32215	0.347074
20120514F1	P19	MicroSource	01505729	120121-02	H10	CM006RL110	P	19	-0.875668	-0.551834
20120514F1	P20	MicroSource	01500179	120121-04	H10	CM006RL110	P	20	-1.20197	-0.595683
20120514F1	P21	MicroSource	01505447	120121-02	H11	CM006RL110	P	21	1.03167	0.159149
20120514F1	P22	MicroSource	01500180	120121-04	H11	CM006RL110	P	22	-0.431632	-0.222965
20120514G1	A03	MicroSource	02300229	120121-05	A02	CM007RL110	A	3	0.577936	1.08208
20120514G1	A04	MicroSource	01500447	120121-07	A02	CM007RL110	A	4	-0.118822	-0.678927
20120514G1	A05	MicroSource	01500182	120121-05	A03	CM007RL110	A	5	0.528168	-1.03439
20120514G1	A06	MicroSource	01500465	120121-07	A03	CM007RL110	A	6	1.00263	1.0136
20120514G1	A07	MicroSource	01500183	120121-05	A04	CM007RL110	A	7	1.35764	-0.0919232
20120514G1	A08	MicroSource	01500467	120121-07	A04	CM007RL110	A	8	0.634341	-1.30833
20120514G1	A09	MicroSource	01500184	120121-05	A05	CM007RL110	A	9	-0.238267	-2.40733
20120514G1	A10	MicroSource	01500774	120121-07	A05	CM007RL110	A	10	0.800236	-2.32906
20120514G1	A11	MicroSource	01500185	120121-05	A06	CM007RL110	A	11	0.20965	-2.166
20120514G1	A12	MicroSource	01500483	120121-07	A06	CM007RL110	A	12	0.601162	-2.37472
20120514G1	A13	MicroSource	01500186	120121-05	A07	CM007RL110	A	13	1.67284	-2.43668
20120514G1	A14	MicroSource	01502387	120121-07	A07	CM007RL110	A	14	1.62307	-3.10521
20120514G1	A15	MicroSource	01500187	120121-05	A08	CM007RL110	A	15	1.80556	-2.06165
20120514G1	A16	MicroSource	01500486	120121-07	A08	CM007RL110	A	16	1.58326	-3.78026
20120514G1	A17	MicroSource	01500188	120121-05	A09	CM007RL110	A	17	1.9615	-3.03999
20120514G1	A18	MicroSource	01500487	120121-07	A09	CM007RL110	A	18	2.78766	-3.19652
20120514G1	A19	MicroSource	01505887	120121-05	A10	CM007RL110	A	19	1.75911	-2.0323
20120514G1	A20	MicroSource	01500488	120121-07	A10	CM007RL110	A	20	1.61312	-3.16065
20120514G1	A21	MicroSource	01500190	120121-05	A11	CM007RL110	A	21	2.17053	-4.5238
20120514G1	A22	MicroSource	01500489	120121-07	A11	CM007RL110	A	22	0.836732	-3.78353
20120514G1	B03	MicroSource	01500284	120121-06	A02	CM007RL110	B	3	0.664202	-0.809373
20120514G1	B04	MicroSource	01500586	120121-08	A02	CM007RL110	B	4	1.15857	-0.209324
20120514G1	B05	MicroSource	01500285	120121-06	A03	CM007RL110	B	5	0.614433	-0.65936
20120514G1	B06	MicroSource	01500587	120121-08	A03	CM007RL110	B	6	1.41073	-1.01482
20120514G1	B07	MicroSource	01500286	120121-06	A04	CM007RL110	B	7	-0.211723	-1.20723
20120514G1	B08	MicroSource	01500588	120121-08	A04	CM007RL110	B	8	1.02253	-1.71923
20120514G1	B09	MicroSource	01500287	120121-06	A05	CM007RL110	B	9	7.89722	-1.87576
20120514G1	B10	MicroSource	01500589	120121-08	A05	CM007RL110	B	10	0.680791	-2.88671
20120514G1	B11	MicroSource	01500288	120121-06	A06	CM007RL110	B	11	1.33773	-2.22144
20120514G1	B12	MicroSource	01500590	120121-08	A06	CM007RL110	B	12	0.0105758	-3.18674
20120514G1	B13	MicroSource	01500291	120121-06	A07	CM007RL110	B	13	0.783646	-4.33792
20120514G1	B14	MicroSource	01500591	120121-08	A07	CM007RL110	B	14	0.20965	-4.00202
20120514G1	B15	MicroSource	01500292	120121-06	A08	CM007RL110	B	15	0.305869	-3.64982
20120514G1	B16	MicroSource	01500592	120121-08	A08	CM007RL110	B	16	1.28465	-2.87693
20120514G1	B17	MicroSource	01500293	120121-06	A09	CM007RL110	B	17	-0.510334	-1.54313
20120514G1	B18	MicroSource	01500593	120121-08	A09	CM007RL110	B	18	0.906408	-4.4488
20120514G1	B19	MicroSource	01500295	120121-06	A10	CM007RL110	B	19	1.16189	-3.69221
20120514G1	B20	MicroSource	01500595	120121-08	A10	CM007RL110	B	20	1.23488	-2.94868
20120514G1	B21	MicroSource	01500296	120121-06	A11	CM007RL110	B	21	0.574619	-4.07703
20120514G1	B22	MicroSource	01500596	120121-08	A11	CM007RL110	B	22	0.833415	-3.64656
20120514G1	C03	MicroSource	01500191	120121-05	B02	CM007RL110	C	3	-0.404162	-2.07795
20120514G1	C04	MicroSource	01504258	120121-07	B02	CM007RL110	C	4	0.0636622	-0.597399
20120514G1	C05	MicroSource	01500192	120121-05	B03	CM007RL110	C	5	0.222921	-1.55943
20120514G1	C06	MicroSource	01500491	120121-07	B03	CM007RL110	C	6	-0.500381	-1.15831
20120514G1	C07	MicroSource	01500193	120121-05	B04	CM007RL110	C	7	0.0902054	-2.28993
20120514G1	C08	MicroSource	01500492	120121-07	B04	CM007RL110	C	8	-1.42939	-6.40222
20120514G1	C09	MicroSource	01500196	120121-05	B05	CM007RL110	C	9	-0.0226032	-3.91397
20120514G1	C10	MicroSource	01500494	120121-07	B05	CM007RL110	C	10	0.315822	-1.34746
20120514G1	C11	MicroSource	01500198	120121-05	B06	CM007RL110	C	11	0.564665	-2.87693
20120514G1	C12	MicroSource	01500495	120121-07	B06	CM007RL110	C	12	-1.90385	-1.7975
20120514G1	C13	MicroSource	01500200	120121-05	B07	CM007RL110	C	13	0.103477	-3.39219
20120514G1	C14	MicroSource	01500496	120121-07	B07	CM007RL110	C	14	0.312505	-3.06282
20120514G1	C15	MicroSource	01500201	120121-05	B08	CM007RL110	C	15	0.332412	-3.32697
20120514G1	C16	MicroSource	01500497	120121-07	B08	CM007RL110	C	16	0.246147	-4.24008
20120514G1	C17	MicroSource	01500202	120121-05	B09	CM007RL110	C	17	-0.155319	-3.47698
20120514G1	C18	MicroSource	01500499	120121-07	B09	CM007RL110	C	18	1.11875	-3.68243
20120514G1	C19	MicroSource	01500205	120121-05	B10	CM007RL110	C	19	1.29129	-2.92911
20120514G1	C20	MicroSource	01500500	120121-07	B10	CM007RL110	C	20	-0.221677	-4.51728
20120514G1	C21	MicroSource	01500206	120121-05	B11	CM007RL110	C	21	1.95155	-3.00085
20120514G1	C22	MicroSource	01500501	120121-07	B11	CM007RL110	C	22	-0.31126	-5.17603
20120514G1	D03	MicroSource	01500299	120121-06	B02	CM007RL110	D	3	2.15726	0.915767
20120514G1	D04	MicroSource	01500597	120121-08	B02	CM007RL110	D	4	0.893137	-0.581093
20120514G1	D05	MicroSource	01500300	120121-06	B03	CM007RL110	D	5	1.32446	-1.23332
20120514G1	D06	MicroSource	01500598	120121-08	B03	CM007RL110	D	6	0.425313	-1.62139
20120514G1	D07	MicroSource	01500302	120121-06	B04	CM007RL110	D	7	1.29129	-0.665883
20120514G1	D08	MicroSource	01500599	120121-08	B04	CM007RL110	D	8	0.558029	-2.36167
20120514G1	D09	MicroSource	01500303	120121-06	B05	CM007RL110	D	9	1.5534	-2.76279
20120514G1	D10	MicroSource	01500600	120121-08	B05	CM007RL110	D	10	1.34105	-2.75301
20120514G1	D11	MicroSource	01500304	120121-06	B06	CM007RL110	D	11	1.33773	-2.16927
20120514G1	D12	MicroSource	01500601	120121-08	B06	CM007RL110	D	12	1.38087	-2.603
20120514G1	D13	MicroSource	01500305	120121-06	B07	CM007RL110	D	13	1.71598	-3.39871
20120514G1	D14	MicroSource	01500603	120121-08	B07	CM007RL110	D	14	0.936269	-3.25522
20120514G1	D15	MicroSource	01500308	120121-06	B08	CM007RL110	D	15	0.710652	-4.09007
20120514G1	D16	MicroSource	01500604	120121-08	B08	CM007RL110	D	16	1.78233	-3.56177
20120514G1	D17	MicroSource	01500309	120121-06	B09	CM007RL110	D	17	1.06899	-3.79331
20120514G1	D18	MicroSource	01500605	120121-08	B09	CM007RL110	D	18	2.06767	-3.19978
20120514G1	D19	MicroSource	01500310	120121-06	B10	CM007RL110	D	19	0.992674	-2.98455
[truncated: 2,163 more rows]

## Sheet: Hit
Mother plate info.						HTS Results					Hit
Mother Plate No.	Well No.	Vender	Vender Compound ID	Vender Plate No.	Vender Well No.	Plate ID	Row	Column	Inhibition % @ 10 mM
									RelA	p52	RelA	p52
20120514A1	A04	Tocris	0691	3	A02	CM001RL110	A	4	156.883	150.591	1	1
20120514A1	F18	Tocris	0912	4	C09	CM001RL110	F	18	25.9747	30.7766		1
20120514B1	B08	Tocris	1675	8	A04	CM002RL110	B	8	62.4421	63.8533	1	1
20120514B1	C14	Tocris	1472	7	B07	CM002RL110	C	14	67.5342	4.74683	1
20120514B1	I18	Tocris	1550	7	E09	CM002RL110	I	18	43.7426	-0.602707	1
20120514B1	L11	Tocris	1381	6	F06	CM002RL110	L	11	96.7421	96.8555	1	1
20120514B1	L16	Tocris	1867	8	F08	CM002RL110	L	16	37.4798	39.5096	1	1
20120514B1	M06	Tocris	1616	7	G03	CM002RL110	M	6	145.496	18.647	1
20120514C1	B12	Tocris	2684	12	A06	CM003RL110	B	12	38.1555	35.7737	1	1
20120514C1	B20	Tocris	2693	12	A10	CM003RL110	B	20	100.905	103.074	1	1
20120514C1	G08	Tocris	2560	11	D04	CM003RL110	G	8	203.621	185.158	1	1
20120514C1	H10	Tocris	3037	12	D05	CM003RL110	H	10	113.183	110.055	1	1
20120514C1	J06	Tocris	3335	12	E03	CM003RL110	J	6	29.9027	33.7756		1
20120514C1	K05	Tocris	2176	9	F03	CM003RL110	K	5	34.3983	38.2299	1	1
20120514C1	O19	Tocris	2252	9	H10	CM003RL110	O	19	200.984	195.942	1	1
20120514C1	P09	Tocris	2457	10	H05	CM003RL110	P	9	38.3169	34.541	1	1
20120514D1	N07	Tocris	1467	14	G04	CM004RL110	N	7	94.2188	100.191	1	1
20120514E1	N13	MicroSource	01502010	120130-02	G07	CM005RL110	N	13	80.7736	74.3294	1	1
20120514F1	D10	MicroSource	01502345	120121-04	B05	CM006RL110	D	10	1.10231	30.5059		1
20120514F1	E13	MicroSource	01505420	120121-01	C07	CM006RL110	E	13	241.75	240.609	1	1
20120514G1	G09	MicroSource	01500223	120121-05	D05	CM007RL110	G	9	38.8167	42.28	1	1
20120514G1	G14	MicroSource	01500522	120121-07	D07	CM007RL110	G	14	56.6836	70.903	1	1
20120514G1	M05	MicroSource	01500259	120121-05	G03	CM007RL110	M	5	92.0092	107.662	1	1
20120514H1	H06	MicroSource	01505483	120121-12	D03	CM008RL110	H	6	92.1484	100.52	1	1
20120514H1	P06	MicroSource	01505708	120121-12	H03	CM008RL110	P	6	82.2099	88.4164	1	1
20120514I1	C13	MicroSource	01505782	120121-13	B07	CM009RL110	C	13	96.9024	97.9951	1	1
20120514I1	J11	MicroSource	01300017	120121-14	E06	CM009RL110	J	11	78.0985	23.9919	1
20120514I1	N06	MicroSource	01504413	120121-16	G03	CM009RL110	N	6	107.662	116.298	1	1
20120514I1	P06	MicroSource	00330071	120121-16	H03	CM009RL110	P	6	29.3343	31.4335		1
20120514J1	N05	Prestwick	Prestw-142	02	G03	CM010RL110	N	5	75.2399	81.339	1	1
20120514J1	P18	Prestwick	Prestw-318	04	H09	CM010RL110	P	18	55.1488	57.8899	1	1
20120514K1	A16	Prestwick	Prestw-487	07	A08	CM011RL110	A	16	59.5188	63.4009	1	1
20120514K1	H17	Prestwick	Prestw-438	06	D09	CM011RL110	H	17	46.6812	52.4721	1	1
20120514L1	B20	Prestwick	Prestw-1167	12	A10	CM012RL110	B	20	97.3533	72.187	1	1
20120514M1	K04	Prestwick	Prestw-1196	15	F02	CM013RL110	K	4	91.3929	74.5041	1	1
