# Supplementary material for: Identification of a Selective RelA Inhibitor Based on DSE-FRET Screening Methods
Source: Int J Mol Sci. 2020 Nov 30;21(23):9150. doi: 10.3390/ijms21239150 (PMC7734590; doi:10.3390/ijms21239150)
Supplement: Supplementary file 1 [file ijms-21-09150-s001.zip › Table S1D. NF-kB_Retest.xlsx]

## Sheet: Hits_Todai Core
#	UT-ID	RelA				p52				自家蛍光* @ 10 mM			Hit Judgement of		Kinetic assay @ 10 mM
		HTS % Inhibition @ 10 mM	Retest % Inhibition @ 10 mM			HTS % Inhibition @ 10 mM	Retest % Inhibition @ 10 mM								RelA		p52
			Run1	Run2	Avg.		Run1	Run2	Avg.	Run1	Run2	Avg.	RelA	p52	Inhibition % ΔRFU(60 min-0 min)	Kinetic fig	Inhibition % ΔRFU(60 min-0 min)	Kinetic fig
1	T-007798	-0.0364038	0.489898	-0.13327	0.178314	32.7116	0.368699	-0.0185486	0.175075	1.00566	1.00704	1.00635			-1.99219		-1.13843
2	T-010759	33.3293	72.7873	69.8069	71.2971	28.5652	69.1188	61.153	65.1359	4.62966	4.48834	4.559			-10.5411		-14.5386
3	T-023307	48.7707	82.9407	90.1059	86.5233	9.47647	47.7207	47.5027	47.6117	1.25999	1.49895	1.37947	1	1	43.1094		19.9508
4	T-026488	195.784	-	-	-	156.413	-	-	-	-	-	-			#VALUE!**		#VALUE!
5	T-033952	77.0356	151.208	169.443	160.326	63.8672	149.483	152.738	151.111	7.2878	12.4825	9.88513			-100.361		-110.514
6	T-039988	31.4302	51.06	47.3738	49.2169	23.4296	47.0353	43.282	45.1587	3.15282	3.11354	3.13318			0.0109461		0.128593
7	T-045738	71.5732	53.5877	52.8877	53.2377	30.5748	13.2447	10.1576	11.7012	1.18257	1.22406	1.20331	1	1	40.9056		16.3843
8	T-075385	42.5866	124.392	122.285	123.338	35.7373	115.406	112.649	114.027	5.37716	6.07515	5.72615			0.642172		2.1823
9	T-100548	39.9004	-1.10057	-1.72496	-1.41276	-0.0986322	0.214974	-0.423942	-0.104484	1.03798	1.0217	1.02984			-1.70759		-1.96672
10	T-104513	65.8366	77.1878	84.5451	80.8665	22.5852	11.4209	8.94141	10.1811	1.05639	1.02702	1.04171	1	1	26.6246		6.93268
11	T-104650	60.8757	94.3088	91.7244	93.0166	14.0847	32.6316	26.0291	29.3304	1.15258	1.28143	1.21701	1	1	31.1088		21.0855
12	T-104851	35.2864	67.7522	67.0735	67.4128	35.8536	63.3077	61.1821	62.2449	3.71123	4.32354	4.01738			-14.4963		-15.6997
13	T-115017	35.5123	137.27	136.476	136.873	30.2299	129.396	124.84	127.118	5.7407	7.19356	6.46713			-25.2052		-24.8185
14	T-139612	140.277	256.613	251.912	254.263	129.809	258.046	245.815	251.931	8.78377	11.5089	10.1463			-18.0173		-40.1286
PC	PC		109.198	105.19	107.194	112.05	112.05	109.251	110.65	0.990323	1.01824	1.00428	-		109.443		107.803

## Sheet: Hits_NPDepo
#	Compound name	Structure	M.W.	RelA				p52				自家蛍光* @ 5 mg/ml			Hit Judgement of:		Kinetic assay @ 5 mg/ml
				HTS % Inhibition @ 5 mg/ml	Retest % Inhibition @ 5 mg/ml			HTS % Inhibition @ 5 mg/ml	Retest % Inhibition @ 5 mg/ml								RelA		p52
					Run1	Run2	Avg.		Run1	Run2	Avg.	Run1	Run2	Avg.	RelA	p52	Inhibition % ΔRFU(60 min-0 min)	Kinetic fig	Inhibition % ΔRFU(60 min-0 min)	Kinetic fig
1	NPD9439		279.092	172.927	-	-	-	107.832	-	-	-	7.23363	8.8319	8.03277			#VALUE!**		#VALUE!
2	NPD9209		420.472	147.713	1.12317	0.605332	0.864252	121.825	0.953653	1.26302	1.10834	1.08041	1.06827	1.07434			-1.39552		0.338427
3	NPD2116		459.506	146.592	121.544	126.05	123.797	103.983	106.735	119.291	113.013	4.68682	7.50756	6.09719			2.46204		-10.0879
4	NPD14270		381.432	136.695	-	-	-	107.396	-	-	-	-	-	-			#VALUE!		#VALUE!
5	Nogalamycin		787.822	128.201	138.438	145.584	142.011	126.868	132.375	145.036	138.705	11.5435	10.0502	10.7969			-19.6204		-12.7577
6	NPD7814		242.233	125.028	149.324	159.858	154.591	108.157	134.192	150.832	142.512	10.0634	11.7208	10.8921			51.9342		36.451
7	NPD14089		359.429	118.171	226.91	258.086	242.498	88.65	188.544	230.213	209.379	5.14217	9.12795	7.13506			102.126		55.5054
8	Curcumin		368.39	115.904	134.68	148.979	141.829	126.74	119.603	135.507	127.555	7.22731	12.9978	10.1125			-84.2082		-91.9632
9	NPD5680		294.313	112.811	67.3739	69.2193	68.2966	101.937	59.1882	65.5477	62.368	4.69049	4.62352	4.657			-2.61388		0.687109
10	NPD10920		439.54	112.437	41.5964	47.0608	44.3286	87.8513	40.8536	44.0571	42.4553	2.7196	2.87423	2.79692			3.31164		4.30725
11	NPD14091		373.456	111.371	-	-	-	75.3067	222.145	263.82	242.983	11.3621	13.8582	12.6102			#VALUE!		-28.7663
12	3-{2-[2-(1-ethyl-3-methyl-5-oxo-2-thioxo-1,3-diazolidin-4-ylidene)ethylidene]-3-hydrobenzoxazol-3-yl}propanoic acid		372.426	107.727	-	-	-	115.024	-	-	-	-	-	-			-18.3008		-26.7084
13	NPD14092		389.455	105.269	122.475	102.306	112.39	63.6615	112.341	94.942	103.641	5.52847	8.45065	6.98956			-12.6103		-12.5184
14	NPD13432		415.45	104.418	86.8197	94.2551	90.5374	102.396	81.3809	89.5548	85.4678	4.24998	4.47134	4.36066			-5.19884		-4.01668
15	NPD14967		339.351	101.836	33.2816	49.3975	41.3395	73.3188	33.7907	47.9712	40.8809	3.54488	3.43174	3.48831			-2.11497		-0.974259
16	Phenosafranin		322.8	99.2748	77.1646	83.4215	80.2931	86.6534	78.6844	85.0891	81.8868	6.41983	6.61333	6.51658			-11.7679		-3.56203
17	NP1023		831.187	95.5267	79.2835	94.1233	86.7034	81.9234	70.2893	86.1445	78.2169	2.7825	6.02339	4.40295			-30.0217		-33.7265
18	NPD12298		369.378	94.1279	95.6077	88.9586	92.2832	154.073	90.3667	93.7219	92.0443	3.87707	3.09153	3.4843			-29.2661		-22.3772
19	NP812		459.033	92.8162	-1.31376	-0.392452	-0.853107	2.29353	-0.208459	0.340595	0.0660678	1.01903	1.05183	1.03543			-0.925524		-0.0854613
20	NPD7887		423.391	91.1726	210.193	227.142	218.668	83.4222	195.927	215.387	205.657	14.1711	14.914	14.5425			7.49458		60.6673
21	NPD7801		422.351	90.6597	82.8767	95.3098	89.0933	91.1102	82.2426	102.321	92.2817	1.01237	0.997405	1.00489	1	1	104.642		96.4516
22	NPD5664		291.046	89.7349	55.4839	88.3925	71.9382	31.3363	21.5181	28.6249	25.0715	1.48716	1.82869	1.65793	1	1	27.0318		16.7504
23	NPD10347		382.423	89.2594	42.5994	47.5331	45.0663	52.1359	37.1749	45.3703	41.2726	2.45673	2.71973	2.58823			0.571222		0.417051
24	NPD9410		308.337	88.8985	60.2268	68.2709	64.2489	21.3669	15.2638	18.9313	17.0975	1.06594	1.08183	1.07388	1	1	36.5112		19.5877
25	Sennoside B		862.759	87.4028	74.5312	85.062	79.7966	83.8042	47.8428	63.3727	55.6078	0.969332	1.01122	0.990275	1	1	72.9899		89.6865
26	NPD2018		459.506	86.5293	139.428	151.995	145.712	61.4777	126.843	141.128	133.985	6.09495	9.33906	7.717			6.49675		-3.10054
27	NPD5109		326.361	86.2936	204.772	177.164	190.968	44.7701	168.074	190.985	179.529	11.0873	11.0091	11.0482			16.2437		24.8932
28	NPD10729		353.356	86.0272	3.61665	2.1103	2.86348	79.267	1.60934	2.75278	2.18106	1.86365	2.25664	2.06014			-4.56255		-5.83188
29	Sennoside A		862.759	85.3803	88.7066	100.46	94.5834	38.6097	48.7351	62.0898	55.4125	1.02325	0.980786	1.00202	1	1	30.5748		63.3303
30	NPD12120		364.402	84.5642	124.294	113.542	118.918	31.3714	99.371	88.5152	93.9431	3.24002	3.23713	3.23857			57.209		37.1928
31	NPD12297		354.363	84.1247	83.3899	107.249	95.3194	41.7518	73.9198	101.733	87.8263	2.75201	4.11156	3.43179			27.2451		26.4075
32	NPD6129		431.496	83.9426	38.1532	39.5552	38.8542	75.5088	33.6419	36.5755	35.1087	2.24394	3.16811	2.70602			-3.48156		-3.6304
33	NPD12303		405.455	83.8889	201.606	179.296	190.451	72.5039	184.606	165.376	174.991	11.8593	14.1067	12.983			-9.58785		-10.1596
34	NPD11631		403.913	83.4448	51.0796	55.3604	53.22	58.7231	44.3731	48.3273	46.3502	3.39058	3.86137	3.62598			1.33406		4.28332
35	NPD11715		480.45	82.4418	27.3796	28.4397	27.9096	63.7901	24.5151	27.5657	26.0404	2.05113	2.05182	2.05147			-0.180766		0.0341845
36	NPD9067		281.314	82.1091	72.2803	95.8225	84.0514	79.4661	74.3259	156.946	115.636	8.4035	14.2844	-			-195.893		-49.2291
37	NPD8590		353.356	82.0305	148.497	138.962	143.729	69.3434	128.311	120.451	124.381	10.1857	9.91032	10.048			#VALUE!		12.4124
38	Daunomycin		527.533	80.712	91.5636	97.7844	94.674	77.7685	92.7291	99.0019	95.8655	7.81355	7.54993	7.68174			-12.838		-4.66277
39	NPD943		483.529	80.563	-	-	-	65.7112	-	-	-	-	-	-			#VALUE!		#VALUE!
40	NP1022		256.263	78.3685	51.4372	54.0087	52.7229	67.3604	47.8225	52.1167	49.9696	3.84973	3.86499	3.85736			-2.30658		-0.881961
41	Daunorubicin(Daunomycin)		527.533	76.5161	75.3411	83.8798	79.6104	78.467	79.205	84.2871	81.746	6.89927	6.76128	6.83028			-10.4989		-6.71726
42	NPD7209		305.339	75.8507	4.88303	3.58207	4.23255	75.3408	4.29841	6.59228	5.44534	1.30349	1.34435	1.32392			-2.72596		-3.55519
43	NPD9012		220.183	73.7434	39.9825	44.9722	42.4773	7.24834	13.0672	15.3627	14.215	0.993596	1.0197	1.00665	1	1	19.4902		7.12406
44	NPD14741		286.377	73.4214	12.0299	12.2407	12.1353	15.9403	10.6178	12.4206	11.5192	-	10.9664	10.9664			-116.443		-162.24
45	NPD11137		392.502	71.1284	48.1892	49.7065	48.9479	44.3037	44.9458	50.0922	47.519	1.35404	1.43215	1.39309	1	1	28.2936		28.1304
46	NPD9222		474.341	71.1062	84.4471	87.081	85.764	91.6153	78.4641	84.139	81.3016	7.9981	5.2956	6.64685			-35.0723		-14.9421
47	Doxorubicin		543.532	70.5213	69.1988	78.3314	73.7651	75.0834	72.2825	76.5192	74.4009	6.03419	5.96614	6.00017			-11.7498		-6.08143
48	NPD14265		363.417	69.0095	143.612	153.795	148.704	59.1001	131.547	142.303	136.925	4.84704	5.65422	5.25063			-8.65871		-7.98551
49	NPD1074		392.521	68.0095	165.317	179.487	172.402	61.1494	155.103	167.563	161.333	10.6842	11.8547	11.2695			-10.6688		-15.1096
50	NPD7500		433.49	67.8514	-0.54647	0.54132	-0.00257522	-0.981846	-0.00923465	0.183122	0.0869438	1.00196	1.08597	1.04396			-0.676067		0.717875
51	NPD14090		389.455	66.901	196.549	169.876	183.212	58.2113	165.491	184.371	174.931	6.32233	10.2518	8.28707			-13.7491		-19.4647
52	T746-14ll		268.225	66.37	36.0049	38.5466	37.2758	42.8732	25.9386	28.4126	27.1756	1.55423	1.67597	1.6151	1	1	3.37672		13.9917
53	NPD14060		355.394	64.1792	40.1449	42.9491	41.547	61.0561	37.6011	40.2049	38.903	4.30707	4.51009	4.40858			-11.1461		-12.8397
54	NPD1753		525.566	63.8847	48.9027	51.5473	50.225	66.0888	44.8727	48.7075	46.7901	2.66795	5.88838	4.27817			1.74982		-8.01969
55	NPD6202		229.2	63.153	-	-	-	58.7685	-	-	-	-	-	-			#VALUE!		#VALUE!
56	NPD9272		346.343	62.8517	89.7615	87.4913	88.6264	66.5008	71.9732	81.038	76.5056	4.98287	6.6661	5.82448			-12.0969		-15.5881
57	NPD5628		256.26	62.7821	12.6757	17.0835	14.8796	4.03246	0.525892	2.5459	1.5359	0.975859	1.0377	1.00678			11.6558		2.28694
58	NPD11981		424.504	62.2422	70.7887	51.5236	61.1561	48.6992	57.5872	40.2241	48.9057	4.93163	4.34987	4.64075			-6.60882		-16.1761
59	NPD6363		396.491	61.6754	88.8729	93.9088	91.3908	77.1625	78.0405	87.4371	82.7388	4.50047	8.49843	6.49945			-69.9819		-72.7789
60	NPD4254		371.44	60.3668	-0.732522	-1.08868	-0.910601	-0.471557	-0.274773	0.748624	0.236926	1.0098	1.0275	1.01865			-2.54881		-0.5743
61	NPD4317		427.458	58.4705	-	-	-	56.8034	-	-	-	12.3791	14.5978	-			-37.5452		-44.2963
62	NP968		494.509	57.8569	37.0097	39.1257	38.0677	44.0915	32.9915	36.2106	34.6011	2.8363	3.11978	2.97804			-5.04338		-4.61491
63	NPD1279		563.702	57.731	147.519	159.178	153.348	46.3082	128.433	149.22	138.827	5.75587	9.18296	7.46942			-22.4187		-26.4349
64	NPD8621		342.151	57.1453	1.42507	1.63131	1.52819	-0.451116	0.417274	2.09911	1.25819	1.02213	0.987382	1.00476			-1.09544		-0.249547
65	NPD9318		297.401	56.946	35.66	40.5871	38.1235	44.5446	34.7878	36.935	35.8614	2.87458	3.13003	3.0023			-1.63413		-0.799918
66	Trypan blue		960.817	54.8479	62.0092	68.9997	65.5045	2.82172	15.1198	16.4208	15.7703	1.00291	1.06484	1.03388	1	1	25.9364		6.75486
67	NPD11773		389.414	54.6764	28.2121	30.0764	29.1443	45.1943	26.3106	28.8366	27.5736	2.23168	3.17995	2.70582			0.621837		1.35371
68	NPD14268		411.459	53.6887	-	-	-	46.3304	-	-	-	14.6447	-	14.6447			#VALUE!		#VALUE!
69	NPD6280		286.377	53.123	47.4625	52.4997	49.9811	48.1511	45.054	50.046	47.55	3.43461	3.712	3.57331			-3.80694		-5.31911
70	Anisomycin		265.312	52.5267	0.564573	2.14536	1.35497	1.62832	0.620794	1.82599	1.22339	0.987915	1.02251	1.00521			-1.47867		-0.0410214
71	Pyrocatechol violet		386.383	52.5126	43.1844	47.4602	45.3223	4.36505	14.9477	16.2259	15.5868	1.50816	1.52422	1.51619	1	1	14.9385		5.90025
72	NPD11046		553.58	51.631	41.5324	39.714	40.6232	48.07	40.2144	30.9666	35.5905	2.61405	2.74966	2.68186			-2.77657		-7.41121
73	NPD8747		413.39	51.3088	137.14	68.2457	102.693	30.3532	103.275	69.8732	86.5742	2.12	3.43251	2.77626			80.6218		25.3273
74	NPD11681		402.41	50.9912	19.4387	18.9908	19.2148	31.94	16.8104	17.8495	17.33	1.57691	2.316	1.94645			1.35936		1.49045
75	NPD7210		271.237	50.1274	51.2292	54.0647	52.6469	42.4208	46.2412	52.4598	49.3505	3.76868	4.23256	4.00062			-0.921909		-1.6682
76	MT-I-459		194.192	50.0297	-	-	-	42.8477	-	-	-	-	-	-			-1.21114		-0.252966
77	NPD9321		299.373	48.023	45.2027	47.8166	46.5097	44.6316	41.5714	45.3708	43.4711	3.43008	3.40723	3.41865			-1.75343		-0.967422
78	lAMe		364.355	47.1665	25.158	27.6865	26.4222	8.31031	3.99314	5.55642	4.77478	1.0329	0.997237	1.01507			4.80116		5.9276
79	NPD2703		413.475	47.1529	83.3878	89.2916	86.3397	39.9482	76.127	83.1438	79.6354	4.83716	6.57625	5.7067			-19.1938		-18.716
80	NPD12253		456.456	46.8283	74.964	75.344	75.154	23.5474	84.1693	61.2889	72.7291	4.97458	4.87179	4.92319			2.46565		2.39634
81	NPD1522		417.425	46.5241	46.2535	50.8988	48.5761	45.1077	45.1079	46.9482	46.028	3.43339	4.88377	4.15858			-5.235		-3.79106
82	NPD12302		432.524	45.5039	-	-	-	46.1446	-	-	-	-	-	-			-20.2169		#VALUE!
83	NPD10954		437.497	45.18	0.771015	1.67873	1.22487	44.5722	1.10603	0.389536	0.747783	1.00735	1.03489	1.02112			-0.625452		0.591392
84	NPD14294		440.501	44.9302	1.61792	2.88843	2.25317	1.37911	1.24652	1.32107	1.28379	1.05902	1.07441	1.06672			-1.01591		0.567463
85	NPD16		382.42	44.5316	-	-	-	38.8811	-	-	-	8.99112	10.9734	9.98227			-15.3868		-8.88114
86	NPD8357		327.25	44.2812	26.8336	28.0414	27.4375	36.735	22.4882	26.5425	24.5154	2.64626	3.55306	3.09966			13.8286		7.54453
87	NPD3603		385.421	43.8127	46.2253	46.5544	46.3899	37.8941	40.3352	43.054	41.6946	3.48458	3.8915	3.68804			-7.48373		-6.69333
88	NPD6175		393.403	41.8696	31.3981	31.139	31.2685	34.6294	25.9853	28.7407	27.363	2.36188	2.79915	2.58052			-1.97397		0.512768
89	NPD1386		366.423	41.6993	-	-	-	37.3539	-	-	-	-	-	-			#VALUE!		#VALUE!
90	NPD8305		257.402	41.4525	66.9537	61.9004	64.4271	37.0207	53.0865	61.4583	57.2724	4.21155	4.66192	4.43674			-13.8431		-14.7233
91	NPD3016		449.511	41.2233	233.483	234.004	233.744	32.6316	216.356	217.554	216.955	7.95496	15.3654	11.6602			#VALUE!		#VALUE!
92	NPD1537		571.636	40.3929	53.8343	62.5098	58.172	37.3961	46.7901	56.3558	51.573	2.74454	4.03965	3.3921			-7.67896		-9.32212
93	NP322		388.29	40.1495	39.786	43.8428	41.8144	3.1909	6.34636	11.3034	8.8249	0.994406	0.992765	0.993586	1		21.1497		7.23345
94	NPD5449		693.781	39.2225	37.435	43.6841	40.5596	47.9484	42.7756	47.113	44.9443	3.74326	3.83428	3.78877			-10.2205		-5.74642
95	NPD12252		416.456	39.0046	-	-	-	20.1014	-	-	-	-	-	-			#VALUE!		#VALUE!
96	NPD8651		394.474	38.2199	55.0281	62.8566	58.9424	12.8807	49.4992	64.4525	56.9759	4.71182	5.74655	5.22919			-61.4281		-12.6038
97	NPD5185		345.402	37.3547	175.853	169.239	172.546	32.768	151.082	175.358	163.22	5.10018	7.41805	6.25911			2.52711		1.96903
98	NPD12654		473.506	36.9943	37.8616	37.8634	37.8625	33.8878	35.0694	38.487	36.7782	3.15258	3.30463	3.2286			-3.48156		-3.92438
99	NPD3770		461.519	36.1233	70.8935	75.5656	73.2295	29.4993	66.049	71.3197	68.6843	4.8048	5.1938	4.9993			-10.8894		-8.1701
100	NPD3114		410.474	35.9256	28.09	32.1475	30.1188	32.7696	25.4428	28.4226	26.9327	3.35224	3.35961	3.35592			-14.6782		-11.7561
101	{[2-(8-cyclohexyl-1,2,3a,4,5,6-hexahydro-3H-pyrazino[3,2,1-jk]carbazol-3-yl)-2-oxoethyl]sulfanyl}acetic acid		426.582	35.7053	22.2057	23.6617	22.9337	19.2153	18.7973	22.5784	20.6878	1.84174	2.01621	1.92897			-2.33912		-3.51759
102	NPD14639		353.422	35.5075	88.4205	95.4055	91.913	34.0994	80.5053	88.9732	84.7393	3.52521	3.66784	3.59652			0.531453		2.13995
103	NPD5745		218.255	35.1874	43.3852	48.7436	46.0644	9.11642	10.5767	13.1486	11.8627	1.19725	1.2888	1.24302	1	1	16.927		5.77719
104	NPD4288		397.475	35.1431	87.2213	95.8037	91.5125	41.3819	81.2771	91.8399	86.5585	5.414	6.54878	5.98139			-19.7542		-18.3468
105	Coelicolorin	Unkown	-	34.0744	32.2554	36.0879	34.1716	24.2105	25.3815	30.5978	27.9897	2.61261	2.38651	2.49956			2.10774		0.697364
106	NP829		442.429	33.7728	0.901303	0.192969	0.547136	6.12922	0.118755	0.62071	0.369732	0.988005	1.02433	1.00617			0.524223		-0.0957167
107	2-{[5-(2-fluorophenyl)-2-furyl]methylene}-6,7,8,9-tetrahydro-5H-[1]benzothieno[3,2-e][1,3]thiazolo[3,2-a]pyrimidine-1,5(2H)-dione		450.514	33.5719	26.3835	32.2279	29.3057	20.7032	25.76	30.691	28.2255	2.34727	2.30663	2.32695			0.77368		-0.235873
108	NPD14269		363.417	33.2127	102.609	86.5677	94.5882	30.3313	98.3792	91.7556	95.0674	7.59354	9.84033	8.71693			-13.0766		-2.86466
109	NPD1237		408.502	31.8312	8.78346	10.4425	9.61299	41.7587	8.97665	10.1109	9.54379	1.40702	1.38604	1.39653			-3.98048		-2.75527
110	NPD4131		393.443	30.9687	60.7226	63.9921	62.3573	30.0935	54.3047	60.648	57.4763	4.74554	5.31544	5.03049			-17.274		-14.6241
111	NPD8311		362.432	30.808	20.8752	21.5484	21.2118	28.9556	14.9693	19.4472	17.2082	1.65812	3.03852	2.34832			-5.73391		-13.4243
112	NP519		364.361	30.7515	50.7384	59.5146	55.1265	23.8775	42.9119	59.4788	51.1953	4.24255	4.63373	4.43814			-2.29212		0.533279
113	NPD9207		368.303	30.1162	109.607	117.806	113.707	33.4553	108.92	114.315	111.618	3.94238	8.318	6.13019			5.094		3.90387
114	NPD3379		355.394	30.0973	19.8218	20.7608	20.2913	22.912	18.466	20.5497	19.5079	2.47284	2.87817	2.67551			-5.01085		-5.27125
115	NPD3769		480.906	30.0298	50.561	54.7066	52.6338	25.0106	45.9906	52.1435	49.067	2.57091	4.07431	3.32261			-18.4056		-20.2475
116	NPD6974		303.367	28.9227	16.9713	23.2949	20.1331	31.9598	23.5076	26.331	24.9193	2.10451	2.74557	2.42504			-13.4816		-13.9199
117	NPD3124		453.54	28.3718	35.9242	37.597	36.7606	33.337	31.6913	36.0101	33.8507	3.18722	3.26154	3.22438			-7.80188		-6.61812
118	NPD2552		427.502	23.1217	125.865	136.709	131.287	32.4339	112.548	127.139	119.843	6.82349	9.52297	8.17323			-31.9414		-42.1188
119	NPD574		356.422	-1.49795	-0.567686	-0.0396343	-0.30366	59.8237	-0.424633	0.17359	-0.125521	0.996	0.977856	0.986928			-0.860448		1.11442
120	NPD5391		346.494	-3.60955	-0.0426583	1.46324	0.710289	99.7075	-0.0321495	1.06321	0.51553	0.9775	1.04495	1.01123			0.122921		0.263221
PC	PC	Unkown	422.34		88.7191	103.595	96.1573		85.5825	105.176	95.3791	0.990323	1.01824	1.00428	-		107.596		105.538

## Sheet: Hits_Known Drugs
#	Compound name	Structure	RelA				p52				自家蛍光 @ 10 mM			Hit Judgement of:		Kinetic assay @ 10 mM							* : @ 10 mM
			HTS % Inhibition @ 10 mM	Retest % Inhibition @ 10 mM			HTS % Inhibition @ 10 mM	Retest % Inhibition @ 10 mM								RelA		p52
				Run1	Run2	Avg.		Run1	Run2	Avg.	Run1	Run2	Avg.	RelA	p52	% Inhibition ΔRFU(60 min-0 min)	Kinetic fig	% Inhibition ΔRFU(60 min-0 min)	Kinetic fig
1	Dipyridamole		156.883	139.533	151.975	145.754	150.591	130.708	143.948	137.328	9.20804	10.1342	9.67112			-5.30886		-5.07943
2	RU 24969 hemisuccinate		25.9747	27.6512	32.4528	30.052	30.7766	31.008	32.3543	31.6812	2.53858	2.75578	2.64718			-19.36		-22.2882
3	YM 90709		62.4421	72.7338	80.7292	76.7315	63.8533	69.8694	75.8712	72.8703	5.30607	4.74012	5.0231			-3.6706		-1.43343
4	Suramin hexasodium salt		67.5342	57.9841	65.5633	61.7737	4.74683	4.91355	5.31565	5.1146	0.996145	1.01019	1.00317	1		36.3082		7.15204
5	SC 560		43.7426	-1.16413	0.0408825	-0.561625	-0.602707	-0.436922	1.18051	0.371792	0.995461	1.01166	1.00356			-1.20772		-1.45234
6	GW 5074		96.7421	95.8175	109.006	102.412	96.8555	86.2003	99.9912	93.0958	4.49885	6.76797	5.63341			-16.6308		-18.3434
7	NSC 663284		37.4798	37.2441	41.7527	39.4984	39.5096	24.8518	28.6074	26.7296	1.01286	1.02864	1.02075	1	1	9.28595		1.64145
8	SB 216763		145.496	73.2571	82.0669	77.662	18.647	64.6031	76.0711	70.3371	4.63144	4.99267	4.81206			-12.4165		-10.0151
9	SN 38		38.1555	30.5294	33.6644	32.0969	35.7737	28.4254	31.6442	30.0348	2.77548	3.00028	2.88788			-0.813661		-1.9062
10	PHA 665752		100.905	88.5951	99.1161	93.8556	103.074	87.9905	99.794	93.8922	4.77928	6.58912	5.6842			-27.0004		-30.7337
11	SB 218078		203.621	123.746	168.574	146.16	185.158	107.171	137.664	122.417	6.56675	5.82954	6.19814			12.6719		4.77307
12	SU 5416		113.183	94.0953	107.841	100.968	110.055	88.436	101.704	95.0701	4.32247	3.53181	3.92714			9.24581		-7.82148
13	SU 6668		29.9027	32.2651	36.3502	34.3077	33.7756	29.2929	32.2542	30.7735	3.18118	3.13082	3.156			-14.5839		-12.2466
14	BVT 948		34.3983	48.3686	67.5563	57.9624	38.2299	21.9793	33.6863	27.8328	1.01738	0.99173	1.00456	1	1	20.5531		6.94402
15	Doxorubicin hydrochloride		200.984	161.117	178.074	169.596	195.942	155.388	171.295	163.342	9.9511	9.99058	9.97084			-15.2662		-14.6445
16	Arcyriaflavin A		38.3169	27.0184	28.469	27.7437	34.541	23.5352	27.0554	25.2953	2.53093	2.81468	2.67281			-3.5137		-3.53631
17	Daunorubicin hydrochloride		94.2188	96.1731	107.888	102.031	100.191	95.6541	107.71	101.682	6.43262	6.85815	6.64538			-15.31		-16.2254
18	DIACERIN		80.7736	84.6995	90.9838	87.8417	74.3294	77.8456	87.1684	82.507	2.57688	5.39894	3.98791			3.05761		2.21256
19	URACIL		1.10231	0.0644289	0.634433	0.349431	30.5059	0.245211	0.918414	0.581812	0.985668	1.03306	1.00936			-1.11285		-1.03253
20	DEXPANTHENOL		241.75	226.5	246.172	236.336	240.609	206.989	231.05	219.019	12.4022	12.5555	12.4789			-4.6448		-1.2292
21	DAUNORUBICIN		38.8167	22.1488	27.2557	24.7023	42.28	29.405	30.4547	29.9298	3.99613	3.54636	3.77124			-14.9341		-15.5371
22	QUINACRINE HYDROCHLORIDE		56.6836	60.5814	66.3376	63.4595	70.903	60.7359	69.7353	65.2356	3.98659	4.43248	4.20954			-18.1888		-15.9947
23	DIPYRIDAMOLE		92.0092	87.1222	93.1225	90.1224	107.662	80.3341	88.2816	84.3078	6.58391	5.85489	6.2194			-1.48867		-1.17247
24	DOXORUBICIN		92.1484	78.8172	84.835	81.8261	100.52	76.6348	88.0508	82.3428	6.46795	6.51167	6.48981			-13.9964		-15.7678
25	EPIRUBICIN HYDROCHLORIDE		82.2099	77.3322	88.4228	82.8775	88.4164	77.2235	88.8248	83.0241	5.74631	6.20862	5.97746			-10.9753		-11.1006
26	CEFTAZIDIME		96.9024	91.9256	105.859	98.8925	97.9951	78.8848	109.486	94.1856	1.07097	1.03156	1.05127	1	1	93.6841		92.4281
27	EVANS BLUE		78.0985	70.4201	77.1889	73.8045	23.9919	62.2546	35.7551	49.0048	0.969737	0.966789	0.968263			4.59372		2.43949
28	TROSPIUM CHLORIDE		107.662	-	-	-	116.298	-	-	-	-	-	-			#VALUE!		#VALUE!
29	LINDANE		29.3343	6.1474	5.58511	5.86626	31.4335	5.50621	6.38719	5.9467	1.33947	1.26086	1.30017			-1.86449		-1.68684
30	Dipyridamole		75.2399	85.4424	87.6959	86.5692	81.339	76.5976	85.5169	81.0572	6.12954	5.79798	5.96376			-4.24344		-0.805598
31	Quinacrine dihydrochloride dihydrate		55.1488	56.8801	59.0838	57.982	57.8899	54.2701	61.84	58.0551	3.76149	3.98663	3.87406			-17.3131		-16.5129
32	Daunorubicin hydrochloride		59.5188	62.0019	66.8569	64.4294	63.4009	64.0751	69.9595	67.0173	5.38019	5.19205	5.28612			-15.1056		-17.8253
33	Doxorubicin hydrochloride		46.6812	48.4903	55.9602	52.2253	52.4721	54.6692	56.6921	55.6806	4.83021	5.45302	5.14162			-14.1606		-16.823
34	Diacerein		97.3533	51.6354	57.1638	54.3996	72.187	46.8489	53.9774	50.4131	1.94429	3.29995	2.62212			3.86763		3.11649
35	Topotecan		91.3929	99.3313	108.67	104.001	74.5041	94.5939	103.618	99.1061	6.26054	6.29051	6.27553			-4.46236		-3.66868
PC	PC	PC		88.7191	103.595	96.1573		85.5825	105.176	95.3791	0.990323	1.01824	1.00428	-		109.443		107.803
