# Supplementary material for: Identification of a Selective RelA Inhibitor Based on DSE-FRET Screening Methods
Source: Int J Mol Sci. 2020 Nov 30;21(23):9150. doi: 10.3390/ijms21239150 (PMC7734590; doi:10.3390/ijms21239150)
Supplement: Supplementary file 1 [file ijms-21-09150-s001.zip › Table S1E. p65_homodimer_VS_final_50 DSE inhibition rate, docking score.xlsx]

## Sheet: Sheet1
Rank	NAMIKI_ID	docking score	auto-fluorescence @ 50 µM	RelA inhibition rate (DSE-FRET) @ 50 µM
1	NS-02162756	-9.40047	1.76	1.1
2	NS-00533505	-7.9031	not availabled	not availabled
3	NS-00965028	-7.69974	55.4	0
4	NS-00847865	-7.69498	not availabled	not availabled
5	NS-02257737	-7.23857	1.11	2
6	NS-00222091	-7.12411	1.04	1.6
7	NS-00216173	-6.97305	1.16	3.5
8	NS-00001527	-6.86545	8.68	0
9	NS-00337693	-6.84689	1.45	2.2
10	NS-07168644	-6.76862	1.46	4.3
11	NS-08537263	-6.72219	1.33	1.9
12	NS-09857507	-6.7096	2.57	0
13	NS-09841345	-6.69656	1.64	0
14	NS-02634918	-6.64671	1.02	0
15	NS-00645464	-6.6352	1.39	0
16	NS-09805263	-6.61727	31.3	0
17	NS-08635954	-6.60345	1.59	7.7
18	NS-00026970	-6.57272	1.1	3.9
19	NS-01888724	-6.46296	1.95	0
20	NS-03969457	-6.4117	1.66	2.2
21	NS-06390864	-6.39542	1	0.3
22	NS-03835996	-6.38146	3.26	0
23	NS-00875109	-6.37016	1.36	0
24	NS-02728006	-6.36838	not availabled	not availabled
25	NS-08543362	-6.34729	2.96	54.4
26	NS-05516319	-6.28839	1.32	0
27	NS-09807525	-6.25677	1	1.8
28	NS-02449199	-6.23968	1.13	0
29	NS-02132130	-6.23568	not availabled	not availabled
30	NS-02355926	-6.23331	1.03	0
31	NS-00625681	-6.22532	1.3	0
32	NS-03160043	-6.21977	30.1	0
33	NS-06831414	-6.21763	1.15	0
34	NS-02375683	-6.18661	1.1	1.6
35	NS-00672374	-6.18363	1.12	0.3
36	NS-01980132	-6.17734	not availabled	not availabled
37	NS-09753922	-6.1584	5.58	0
38	NS-06100959	-6.14639	2.04	7.3
39	NS-01971270	-6.12686	not availabled	not availabled
40	NS-02239115	-6.12631	1.11	0
41	NS-01967366	-6.00047	1.92	62.8	A55
42	NS-03928343	-5.97196	1.04	0.6
43	NS-02653685	-5.88043	not availabled	not availabled
44	NS-00887054	-5.87764	not availabled	not availabled
45	NS-01522549	-5.83329	9.43	100
46	NS-06973524	-5.65856	1.31	2.5
47	NS-07203386	-5.62157	not availabled	not availabled
48	NS-02194613	-5.60317	1.15	28.2
49	NS-02487108	-5.58364	1.33	9.5
50	NS-06404069	-5.53037	0.77	0
