# Supplementary material for: Identification of a Selective RelA Inhibitor Based on DSE-FRET Screening Methods
Source: Int J Mol Sci. 2020 Nov 30;21(23):9150. doi: 10.3390/ijms21239150 (PMC7734590; doi:10.3390/ijms21239150)
Supplement: Supplementary file 1 [file ijms-21-09150-s001.zip › Table S1F. 2nd screening at 96 well plate.xlsx]

## Sheet: Sheet1
#	Compound name	Structure	auto-fluorescence @ 50 µM			Hit Judgement of:		Kinetic assay @ 50 µM
								RelA		p52
			Run1	Run2	Average	RelA	p52	Inhibition % ΔRFU(120 min-0 min)	Kinetic fig	Inhibition % ΔRFU(120 min-0 min)	Kinetic fig
1	NP322		0.979434	1.15147	1.06545	1	1	92.3282		88.6357
2	Suramin hexasodium salt		1.11026	1.79237	1.45131	1	1	107.344		72.6772
3	A55		1.9152	1.23542	1.57531	1		62.8401		6.65705
