# Supplementary material for: Identification of a Selective RelA Inhibitor Based on DSE-FRET Screening Methods
Source: Int J Mol Sci. 2020 Nov 30;21(23):9150. doi: 10.3390/ijms21239150 (PMC7734590; doi:10.3390/ijms21239150)
Supplement: Supplementary file 1 [file ijms-21-09150-s001.zip › Table S2 SPR analysis.xlsx]

## Sheet: Results
								GST-RelA (MW 61.0kDa)							GST-p52 (MW 73.4kDa)
index	Compound	Structure	MW	Run	Concentration range	immobilized ligand (RU)	Binding to reference (sample: green, reference: red)	Difference (Sample - Reference)	Kinetic analysis or Equilibrium analysis	Theoretical Rmax	Rmax	Kd	immobilized ligand (RU)	Binding to reference (sample: green, reference: red)	Difference (Sample - Reference)	Kinetic analysis or Equilibrium analysis	Theoretical Rmax	Rmax	Kd	Remarks
1	A55		226.19	1	100 uM - 3.13 uM	1220				4.5238	4.7	13.0 uM	1110				3.42058	11.4	1.27 uM
				2	20 uM - 0.625 uM	1350				5.00584	7.3	2.87 uM	930				2.8659	n.d. (not determined)	n.d.
